# Supplementary material
Source: PubMed Central journal article supplement (PMC8530207)
Supplement: NIHMS1724710-supplement-Supplemental_Publication_Material.pdf [file NIHMS1724710-supplement-Supplemental_Publication_Material.pdf]

## SUPPLEMENTAL MATERIALS

### **Inhibition of homeodomain-interacting protein kinase 2 (HIPK2) alleviates thoracic aortic disease in mice with progressively severe Marfan syndrome**

Cristina I. Caescu,<sup>1\*</sup> Jens Hansen,<sup>1\*</sup> Brittany Crockett,<sup>1\*</sup> Wenzhen Xiao,<sup>2</sup> Pauline Arnaud,<sup>4,5</sup> Bart Spronck,<sup>6</sup> Alan Weinberg,<sup>3</sup> Takeshi Hashimoto,<sup>1</sup> Sae-Il Murtada,<sup>6</sup> Roshan Borkar,<sup>7</sup> James M. Gallo,<sup>7</sup> Guillaume Jondeau,<sup>4,5</sup> Catherine Boileau,<sup>4,5</sup> Jay D. Humphrey,<sup>6</sup> John Cijiang He,<sup>2</sup> Ravi Iyengar,<sup>1</sup> Francesco Ramirez<sup>1</sup>

From the Departments of <sup>1</sup> Pharmacological Sciences and Institute for Systems Biomedicine, <sup>2</sup> Medicine, Division of Nephrology, and <sup>3</sup> Population Health Science and Policy, Icahn School of Medicine at Mount Sinai, New York, NY 10029; <sup>4</sup> Département de Génétique et Centre de Référence Maladies Rares Syndrome de Marfan et Pathologies Apparentées, Assistance Publique-Hôpitaux de Paris, Hôpital Bichat, Paris, France; <sup>5</sup> LVTS, INSERM U1148, Université de Paris, Hôpital Bichat, Paris, France; <sup>6</sup> Department of Biomedical Engineering, Yale University, New Haven, CT 06520; <sup>7</sup> Department of Pharmaceutical Sciences, State University of New York at Buffalo, NY 14260

## Major Resources Table

In order to allow validation and replication of experiments, all essential research materials listed in the Methods should be included in the Major Resources Table below. Authors are encouraged to use public repositories for protocols, data, code, and other materials and provide persistent identifiers and/or links to repositories when available. Authors may add or delete rows as needed.

### Genetically Modified Animals

|               | Species | Vendor or Source       | Background Strain     | Other Information |
|---------------|---------|------------------------|-----------------------|-------------------|
| Parent - Male | Rodent  | The Jackson Laboratory | C57BL/6j;129T2/SvEmsJ | Stock# 004847     |

### Antibodies

| Target antigen | Vendor or Source | Catalog # |
|----------------|------------------|-----------|
| Smad3          | Cell Signaling   | 3108      |
| p-Smad3        | Abcam            | Ab52903   |
| GAPDH          | Cell Signaling   | 6383S     |

Supplemental Material: Figures

Supp. Fig. I

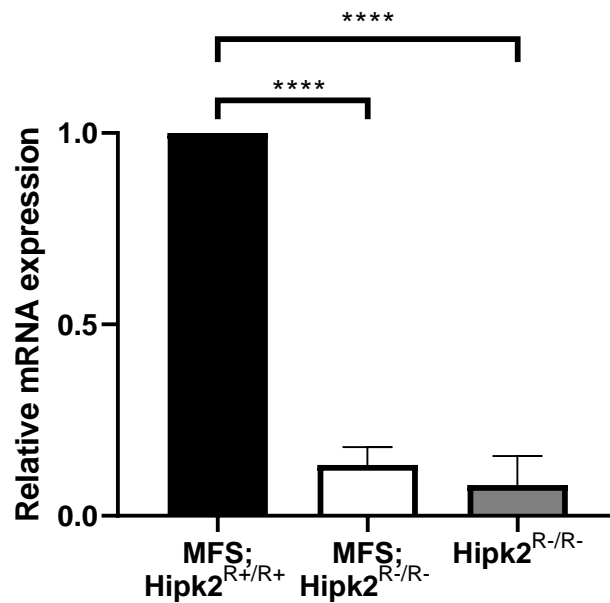

**Supplemental Figure I: Cre-directed *Hipk2* recombination.** Bar graphs summarize q-PCR estimates of *Hipk2* transcript levels in the ascending aorta of 3-month-old vehicle (VEH)-or tamoxifen (Tmx)-treated  $Hipk2^{R-/R-}$  and  $Fbn1^{mgR/mgR};Hipk2^{R-/R-}$  mice (n=3 per genotype and treatment). Data quantification is shown below with average WT value normalized to 1. 2 × 2 Factorial ANOVA to test for interaction followed by main effect comparisons by CONTRAST statements were employed to determine statistically significant differences which are indicated by asterisks (\*\*\*\* $p$ <0.0001). Error bars indicate means ± SD

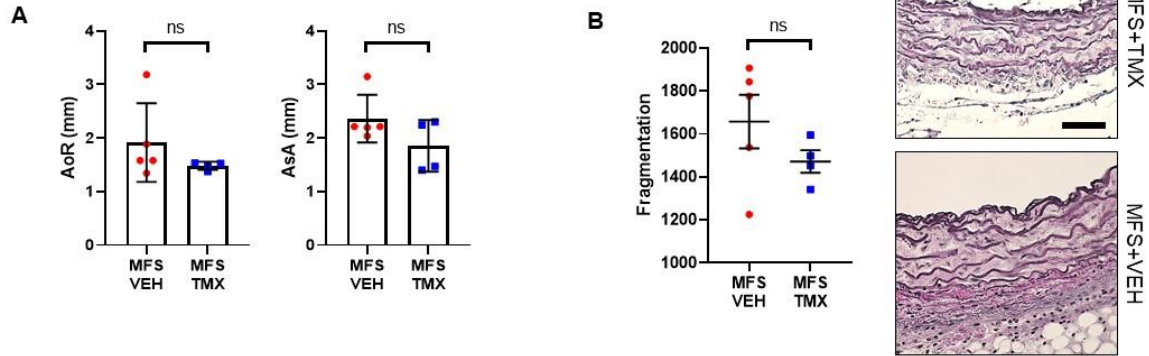

**Supplemental Figure II: Tamoxifen effects on TAAD progression in MFS mice.** (A) Diameters of the aortic root (AoR) and proximal ascending aorta (AsA) and (B) degree of elastic fiber fragmentation (illustrated in the representative images on the right; scale bar: 50 μm) in 3-month-old MFS mice injected with vehicle (VEH) or tamoxifen (TMX) for 5 consecutive days soon after birth. Data are presented as mean ± SD. The Wilcoxon Rank sum test compared the two groups with no statistically significant differences found.

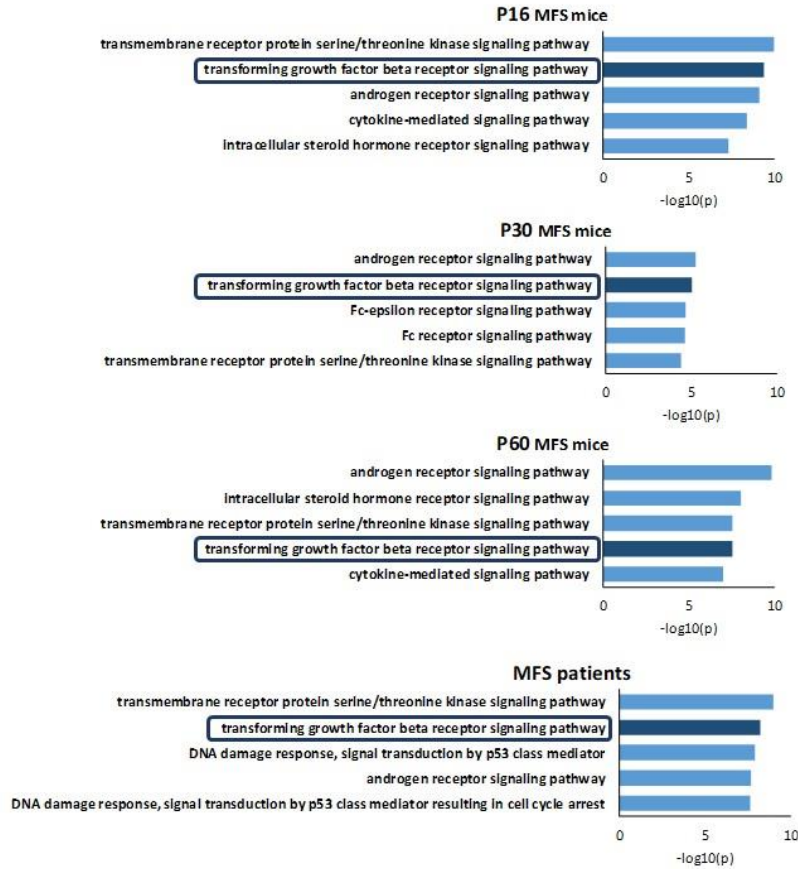

**Supplemental Figure III: Predicted DEG-associated signaling pathways.** Top 5 predictions of signaling pathways associated with X2K regulatory subnetworks derived from the mouse and human data sets with highlighted TGFβ receptor signaling pathway.

|             | P16<br>HIPK2 | P30<br>HIPK2 | P60<br>HIPK2 | Patients<br>HIPK2 |
|-------------|--------------|--------------|--------------|-------------------|
| AR          |              |              |              |                   |
| ASXL1       |              |              |              |                   |
| CAV1        |              |              |              |                   |
| CEBPB       |              |              |              |                   |
| CHD8        |              |              |              |                   |
| CHUK        |              |              |              |                   |
| CITED1      |              |              |              |                   |
| FOS         |              |              |              |                   |
| FOXH1       |              |              |              |                   |
| GATA1       |              |              |              |                   |
| HDAC4       |              |              |              |                   |
| HIF1A       |              |              |              |                   |
| HIPK2       |              |              |              |                   |
| JUN         |              |              |              |                   |
| MAPK8       |              |              |              |                   |
| MDM4        |              |              |              |                   |
| MECP2       |              |              |              |                   |
| MYC         |              |              |              |                   |
| NCOR1       |              |              |              |                   |
| NFKB1       |              |              |              |                   |
| PARP1       |              |              |              |                   |
| PAX6        |              |              |              |                   |
| PHF1        |              |              |              |                   |
| PML         |              |              |              |                   |
| RCHY1       |              |              |              |                   |
| RELA        |              |              |              |                   |
| RUNX1       |              |              |              |                   |
| SIAH2       |              |              |              |                   |
| SIN3A       |              |              |              |                   |
| SIN3A PARP1 |              |              |              |                   |
| SKI         |              |              |              |                   |
| SIRT1       |              |              |              |                   |
| SMAD1       |              |              |              |                   |
| SMAD2       |              |              |              |                   |
| SMAD3       |              |              |              |                   |
| SMAD4       |              |              |              |                   |
| SMURF1      |              |              |              |                   |
| SUMO1       |              |              |              |                   |
| TLE1        |              |              |              |                   |
| TP53        |              |              |              |                   |
| TP63        |              |              |              |                   |
| TRIM28      |              |              |              |                   |

Supp. Fig. IV

**Supplemental Figure IV: Predicted HIPK2-targeted subnetwork components.** All potential HIPK2 targets in both human and mouse MFS aortas are listed; blue frame highlights the Smad3 protein.





























































































| <b>NCBI gene symbol</b> | <b>P-value</b> | <b>Q-value</b> |
|-------------------------|----------------|----------------|
| 1190005I06RIK           | 0.00117165     | 0.0431344      |
| 2900055J20RIK           | 2.47423E-05    | 0.00182177     |
| 6030408B16RIK           | 0.000568793    | 0.0249837      |
| ABR                     | 1.31571E-08    | 2.50141E-06    |
| ACAN                    | 5.70783E-07    | 7.41901E-05    |
| ACTA1                   | 3.76967E-05    | 0.00259557     |
| ACTR3B                  | 9.880979E-13   | 4.66163E-10    |
| ADAMTS17                | 3.23075E-12    | 1.41908E-09    |
| ADAMTSL3                | 2.44522E-07    | 3.53945E-05    |
| ADGRD1                  | 1.06013E-05    | 0.000937776    |
| ADRA1B                  | 2.05478E-05    | 0.00160576     |
| AGAP2                   | 0.000225686    | 0.0112737      |
| AGPAT4                  | 0.000112256    | 0.00611075     |
| AGT                     | 0.00038069     | 0.0175697      |
| AKAP5                   | 3.80016E-10    | 1.0757E-07     |
| ALDH3A1                 | 5.00877E-10    | 1.38699E-07    |
| ALOX5                   | 0.000217585    | 0.0109118      |
| ALOX5AP                 | 0.000154797    | 0.00808117     |
| ANGPT2                  | 6.53861E-09    | 1.34337E-06    |
| ANGPTL1                 | 0.000348448    | 0.016439       |
| ANGPTL7                 | 1.58159E-05    | 0.00129143     |
| APOL10A                 | 0.000891205    | 0.0352552      |
| APOL9A                  | 8.87496E-05    | 0.00506947     |
| AQP11                   | 0.000245568    | 0.0121714      |
| ARC                     | 0.00066222     | 0.0279317      |
| ARHGAP26                | 1.87361E-05    | 0.00150101     |
| ARMC3                   | 0.000118423    | 0.00633813     |
| ART3                    | 0              | 0              |
| ATP10B                  | 6.85674E-13    | 3.79744E-10    |
| B4GALNT3                | 2.75469E-09    | 6.26593E-07    |
| BAHCC1                  | 0.000718448    | 0.0296168      |
| BC067074                | 0.00100562     | 0.0387928      |
| BLNK                    | 0.000919794    | 0.0361615      |
| BMPR1B                  | 0              | 0              |
| BPGM                    | 1.07476E-05    | 0.000944158    |
| C5AR1                   | 0.00115461     | 0.0427541      |
| CACNA1G                 | 3.11638E-09    | 6.84422E-07    |
| CAMK2B                  | 6.01519E-10    | 1.53243E-07    |
| CCBE1                   | 0.000165267    | 0.00859254     |
| CCDC24                  | 0.000603236    | 0.0261361      |
| CCDC88C                 | 1.69909E-12    | 7.72962E-10    |
| CCK                     | 0.000103556    | 0.00572606     |
| CCL27A                  | 6.9906E-06     | 0.000684971    |
| CCL6                    | 0              | 0              |
| CCL9                    | 0.00038308     | 0.0176162      |



|         |             |             |
|---------|-------------|-------------|
| CCR9    | 4.45491E-08 | 7.77352E-06 |
| CD209F  | 0.000204035 | 0.010396    |
| CD3D    | 0.000361775 | 0.0168802   |
| CD3E    | 0.000795376 | 0.0321635   |
| CD3G    | 1.04528E-06 | 0.000128026 |
| CD84    | 0.00103968  | 0.0396511   |
| CD8B1   | 1.28562E-08 | 2.50141E-06 |
| CHAD    | 1.01214E-05 | 0.000901585 |
| CHIL3   | 0.00039207  | 0.0179647   |
| CHRDL1  | 1.04016E-10 | 3.75593E-08 |
| CILP    | 6.54548E-07 | 8.23227E-05 |
| CLDN3   | 3.04162E-07 | 4.23144E-05 |
| CLEC1A  | 0.000323768 | 0.0154463   |
| CLEC4A2 | 8.59692E-05 | 0.00493277  |
| CLEC4A3 | 4.21285E-11 | 1.67698E-08 |
| CLMP    | 0.00110812  | 0.0413691   |
| CNTN2   | 0.00053357  | 0.0237644   |
| COL19A1 | 5.0406E-06  | 0.00052201  |
| COL27A1 | 0           | 0           |
| COL6A6  | 2.80467E-05 | 0.00201841  |
| CP      | 9.4514E-06  | 0.000859942 |
| CREM    | 2.22045E-15 | 1.76775E-12 |
| CRHR2   | 2.29707E-05 | 0.00174167  |
| CTHRC1  | 9.07496E-13 | 4.44603E-10 |
| CXCL3   | 0.000818571 | 0.0328926   |
| CXXC4   | 1.36902E-06 | 0.000159987 |
| DAPK2   | 8.16716E-05 | 0.00481132  |
| DGKG    | 1.07583E-09 | 2.58565E-07 |
| DHRS9   | 0.000189461 | 0.00973126  |
| DLGAP1  | 6.4229E-09  | 1.34123E-06 |
| DLL1    | 9.73394E-05 | 0.0054382   |
| DMC1    | 1.19751E-07 | 1.83782E-05 |
| DNAJC17 | 8.04448E-06 | 0.00074796  |
| DNTT    | 1.63989E-11 | 6.96297E-09 |
| DOK2    | 6.56901E-05 | 0.00408176  |
| DPEP1   | 0.000585786 | 0.0255793   |
| DPEP2   | 1.44327E-05 | 0.00120159  |
| DPP10   | 6.59202E-07 | 8.23227E-05 |
| DUOXA1  | 2.45038E-05 | 0.00182116  |
| DYSF    | 1.33176E-05 | 0.00111605  |
| EFHD1   | 0.000682469 | 0.0284856   |
| EHD4    | 1.91564E-08 | 3.53644E-06 |
| EPHA1   | 0.000342183 | 0.0162035   |
| EPHB6   | 0.000844942 | 0.0338455   |
| ESM1    | 0.000154542 | 0.00808117  |
| ETV1    | 7.55825E-06 | 0.000723887 |
| F13A1   | 0.000327092 | 0.0155466   |

|               |             |             |
|---------------|-------------|-------------|
| F830016B08RIK | 2.4591E-05  | 0.00182116  |
| FAIM2         | 1.37239E-07 | 2.05664E-05 |
| FAM169B       | 0.000132626 | 0.00703914  |
| FAM198A       | 2.36369E-05 | 0.00178158  |
| FAM46B        | 1.30866E-06 | 0.000155792 |
| FAM65B        | 1.92328E-05 | 0.00152166  |
| FBLN1         | 3.4163E-06  | 0.000371939 |
| FBLN7         | 1.72144E-05 | 0.00138783  |
| FBN1          | 0.000115202 | 0.006218    |
| FBXL22        | 0.000184521 | 0.00951592  |
| FCGR2B        | 1.20741E-05 | 0.00104129  |
| FCNA          | 1.23738E-07 | 1.8764E-05  |
| FECH          | 0.00108546  | 0.0410283   |
| FKBP5         | 2.16237E-05 | 0.0016603   |
| FMO3          | 6.46649E-06 | 0.000643517 |
| FOLH1         | 0.000256408 | 0.0125198   |
| FOXO6         | 1.12045E-06 | 0.000135807 |
| FRYL          | 2.61196E-05 | 0.00191214  |
| FST           | 2.90585E-08 | 5.28782E-06 |
| GABRQ         | 9.56462E-05 | 0.00537423  |
| GATM          | 0.000114466 | 0.00620456  |
| GBP6          | 3.67089E-06 | 0.00039627  |
| GBP8          | 2.60032E-09 | 6.02234E-07 |
| GCNT4         | 7.38139E-05 | 0.00445612  |
| GDA           | 0.000492475 | 0.0220886   |
| GDF10         | 5.54567E-05 | 0.00356772  |
| GFRA2         | 7.24728E-05 | 0.00441702  |
| GIPC2         | 8.2187E-05  | 0.00481132  |
| GM28042       | 7.28084E-13 | 3.86431E-10 |
| GM4532        | 0.000979014 | 0.0379048   |
| GM5820        | 1.87361E-05 | 0.00150101  |
| GM5859        | 0.000968354 | 0.0377214   |
| GPNMB         | 5.47026E-06 | 0.000561937 |
| GPR176        | 0.000807018 | 0.032531    |
| GPR35         | 4.24518E-05 | 0.00283116  |
| GRB14         | 8.30097E-05 | 0.00482821  |
| GRCC10        | 0.000101945 | 0.00567062  |
| GRIA4         | 2.83994E-06 | 0.000314567 |
| GRP           | 0.00101108  | 0.0387928   |
| GRTP1         | 0.000749406 | 0.0305959   |
| GSTM1         | 0.000154485 | 0.00808117  |
| GXYLT2        | 6.31666E-06 | 0.000633556 |
| H2-Q4         | 8.46905E-06 | 0.00078173  |
| H2-Q6         | 3.35011E-08 | 6.01038E-06 |
| HDAC9         | 0.000716181 | 0.0296168   |
| HHIPL1        | 1.44732E-08 | 2.71116E-06 |
| HMCN2         | 1.48284E-05 | 0.00121861  |

|         |             |             |
|---------|-------------|-------------|
| HSPA1A  | 0.000539569 | 0.0239478   |
| IGF1    | 3.38903E-10 | 1.00394E-07 |
| IGSF9   | 5.70153E-11 | 2.20079E-08 |
| IIGP1   | 4.12803E-07 | 5.53504E-05 |
| ILDR2   | 2.27121E-06 | 0.000253778 |
| ISG20   | 1.11022E-15 | 9.42801E-13 |
| ITGAM   | 1.20312E-10 | 4.142E-08   |
| ITGB2   | 0.000432008 | 0.0196533   |
| JPH4    | 6.3758E-10  | 1.59245E-07 |
| KANK4   | 4.77774E-05 | 0.00313545  |
| KCNJ15  | 0           | 0           |
| KCTD16  | 2.67554E-07 | 3.82933E-05 |
| KHK     | 0.00133693  | 0.0479714   |
| KIF26B  | 0.000481371 | 0.021821    |
| KRT18   | 6.72131E-05 | 0.00413741  |
| LAMA3   | 9.57725E-05 | 0.00537423  |
| LAMC2   | 5.1237E-09  | 1.08776E-06 |
| LAPTM5  | 3.79191E-07 | 5.13844E-05 |
| LAT     | 0.000489154 | 0.0220171   |
| LBH     | 0.000211892 | 0.0107106   |
| LCK     | 7.24576E-06 | 0.000699216 |
| LCLAT1  | 0.00102664  | 0.0392714   |
| LCN8    | 0.000888761 | 0.0352552   |
| LCP1    | 1.20985E-05 | 0.00104129  |
| LIFR    | 0.000408897 | 0.0186686   |
| LILR4B  | 2.16368E-05 | 0.0016603   |
| LILRB4A | 1.63257E-05 | 0.00132457  |
| LMCD1   | 0.00137079  | 0.0490482   |
| LMNTD1  | 2.63258E-05 | 0.00191621  |
| LMO7    | 8.52651E-14 | 5.43054E-11 |
| LOXL1   | 0.00100967  | 0.0387928   |
| LPAR1   | 3.34406E-05 | 0.00234048  |
| LRRC17  | 1.26568E-05 | 0.00107603  |
| LRRC75B | 0.00121308  | 0.0440235   |
| LRRC8B  | 6.03728E-05 | 0.00386446  |
| LRTM2   | 0.000724207 | 0.0296718   |
| LSP1    | 1.99917E-10 | 6.36636E-08 |
| LY6D    | 4.14006E-06 | 0.000435836 |
| LYPD1   | 0.000548891 | 0.024193    |
| LYVE1   | 0.000264377 | 0.0128536   |
| LYZ1    | 2.0065E-06  | 0.000226184 |
| LYZ2    | 2.09676E-05 | 0.00162857  |
| MAF     | 6.56713E-05 | 0.00408176  |
| MAGI1   | 3.56569E-10 | 1.03227E-07 |
| MARCH1  | 0.000234442 | 0.0116653   |
| MCTP1   | 0.00139879  | 0.0499096   |
| MDFI    | 0.000105958 | 0.00581633  |

|            |             |             |
|------------|-------------|-------------|
| MDGA1      | 3.05986E-05 | 0.00216536  |
| MEG3       | 5.87636E-10 | 1.52761E-07 |
| METTL20    | 2.93822E-05 | 0.00210078  |
| MFAP4      | 4.95159E-13 | 2.86697E-10 |
| MGAT5B     | 1.30746E-08 | 2.50141E-06 |
| MKRN1      | 7.19425E-14 | 4.82317E-11 |
| MLXIPL     | 8.21565E-15 | 5.81394E-12 |
| MPPED2     | 3.7588E-05  | 0.00259557  |
| MRGPRF     | 0.000656596 | 0.0277864   |
| MS4A6D     | 0.000623954 | 0.0266807   |
| MTMR7      | 9.03892E-05 | 0.00513648  |
| MUM1L1     | 2.95211E-05 | 0.00210078  |
| MYB        | 4.24326E-06 | 0.000443038 |
| MYLK2      | 1.0615E-10  | 3.75593E-08 |
| NCAM1      | 0.000213356 | 0.010742    |
| NDRG1      | 4.01041E-06 | 0.000425705 |
| NECAB1     | 0.000705527 | 0.0292736   |
| NFAT5      | 6.28139E-06 | 0.000633556 |
| NGP        | 0.00108906  | 0.0410427   |
| NLRC5      | 8.55589E-06 | 0.000784064 |
| NOTCH3     | 0.000314246 | 0.0151051   |
| NOV        | 1.36497E-06 | 0.000159987 |
| NPAS4      | 0.000959391 | 0.0374869   |
| NPPA       | 0           | 0           |
| NPR3       | 9.05884E-09 | 1.83161E-06 |
| NPTX2      | 4.73791E-08 | 8.15561E-06 |
| NPY1R      | 0.000251681 | 0.012378    |
| NR2F2      | 0           | 0           |
| NR4A1      | 4.11231E-05 | 0.00275698  |
| NRG1       | 3.87771E-05 | 0.00262918  |
| NSG2       | 2.66195E-05 | 0.00192659  |
| NTN4       | 0.000958873 | 0.0374869   |
| NXPH1      | 0.0011657   | 0.0430397   |
| OLFR328    | 1.26921E-05 | 0.00107603  |
| OLFR329-PS | 0.000978988 | 0.0379048   |
| OLFR330    | 0           | 0           |
| OPTC       | 0.000650421 | 0.0276169   |
| OSR1       | 0.000197968 | 0.0101274   |
| P2RX1      | 1.91684E-06 | 0.000218006 |
| PALLD      | 0           | 0           |
| PAQR6      | 1.1151E-07  | 1.73222E-05 |
| PDE4B      | 0.000371055 | 0.01725     |
| PDLIM4     | 1.89376E-05 | 0.00150767  |
| PDZRN4     | 0.000544607 | 0.0240875   |
| PIPOX      | 0.000248737 | 0.0122807   |
| PIRA2      | 0.000675702 | 0.0284062   |
| PKDCC      | 0           | 0           |

|          |             |             |
|----------|-------------|-------------|
| PLA1A    | 0.000886551 | 0.0352552   |
| PLA2G7   | 9.42438E-08 | 1.50068E-05 |
| PMEPA1   | 5.30313E-07 | 6.96405E-05 |
| PNCK     | 6.98033E-07 | 8.63256E-05 |
| PODXL2   | 3.40301E-06 | 0.000371939 |
| PPFIBP2  | 8.23416E-05 | 0.00481132  |
| PPP1R1B  | 4.08562E-13 | 2.47822E-10 |
| PREX2    | 0.0010964   | 0.0411537   |
| PRSS12   | 7.72222E-05 | 0.00459652  |
| PRSS23   | 7.90604E-06 | 0.000740494 |
| PSMB8    | 0.00108137  | 0.0409955   |
| PTGFR    | 1.99073E-05 | 0.0015653   |
| PTGIR    | 0           | 0           |
| PTPRZ1   | 8.58574E-05 | 0.00493277  |
| RAB17    | 3.05615E-07 | 4.23144E-05 |
| RCOR2    | 9.42487E-08 | 1.50068E-05 |
| RGS17    | 8.81961E-13 | 4.44603E-10 |
| RGS2     | 3.41647E-09 | 7.37609E-07 |
| RLTPR    | 0.00111071  | 0.0413691   |
| RPA1     | 2.42589E-05 | 0.00181771  |
| S100A8   | 7.05774E-06 | 0.000686271 |
| S100A9   | 1.60274E-10 | 5.2348E-08  |
| SELPLG   | 0.00025653  | 0.0125198   |
| SEMA3E   | 7.78521E-06 | 0.000738    |
| SEMA4G   | 2.84044E-07 | 4.02017E-05 |
| SEPT1    | 0.000979014 | 0.0379048   |
| SERPINB8 | 0.00124948  | 0.0450875   |
| SKAP1    | 0.000313862 | 0.0151051   |
| SLC11A1  | 0.000268319 | 0.0129956   |
| SLC15A2  | 1.13012E-06 | 0.000135807 |
| SLC16A10 | 6.45234E-05 | 0.00406881  |
| SLC22A3  | 9.78765E-06 | 0.00088422  |
| SLC25A23 | 1.01175E-05 | 0.000901585 |
| SLC35G1  | 5.86834E-08 | 9.70792E-06 |
| SLC37A1  | 4.55924E-05 | 0.0030091   |
| SLC43A3  | 6.72354E-05 | 0.00413741  |
| SLC6A2   | 0.00118779  | 0.043368    |
| SLC7A2   | 5.84762E-06 | 0.000595896 |
| SLIT3    | 7.82148E-06 | 0.000738    |
| SMAD7    | 3.86156E-05 | 0.00262918  |
| SMIM5    | 0.000684298 | 0.0284856   |
| SMOC1    | 6.80284E-06 | 0.000671741 |
| SNCG     | 0.00010384  | 0.00572606  |
| SNRK     | 4.7999E-05  | 0.00313544  |
| SPARCL1  | 7.45642E-05 | 0.00448018  |
| SPRY4    | 0.000374103 | 0.0173284   |
| SRPX2    | 2.24611E-05 | 0.00171323  |

|               |             |             |
|---------------|-------------|-------------|
| STEAP4        | 6.53785E-05 | 0.00408176  |
| STK38L        | 0.000868085 | 0.0346635   |
| TAL2          | 0.00123448  | 0.0446728   |
| TANC2         | 0.00014445  | 0.00763488  |
| TCEA3         | 5.83097E-07 | 7.50251E-05 |
| TCEAL3        | 0           | 0           |
| TCF7          | 0           | 0           |
| TDRD7         | 0.000618824 | 0.0266303   |
| TGTP1         | 2.68096E-10 | 8.32928E-08 |
| TGTP2         | 4.71772E-07 | 6.25983E-05 |
| THEMIS        | 3.83965E-06 | 0.000411004 |
| THY1          | 0.000207563 | 0.0105336   |
| TIAM1         | 1.04646E-07 | 1.64566E-05 |
| TIMM50        | 0.00107347  | 0.0408177   |
| TMEM106A      | 9.96298E-09 | 1.98294E-06 |
| TMEM120A      | 0.000352265 | 0.0165578   |
| TMEM132E      | 0.000914598 | 0.0360686   |
| TMEM141       | 9.07291E-05 | 0.00513648  |
| TMEM215       | 5.61919E-08 | 9.41807E-06 |
| TMEM26        | 0.000120037 | 0.00639764  |
| TMEM35        | 1.7746E-06  | 0.000203647 |
| TMEM52        | 3.51984E-07 | 4.82105E-05 |
| TNFSF13B      | 0.00128245  | 0.0461466   |
| TNNI1         | 0.00109847  | 0.0411537   |
| TNNT1         | 1.55795E-10 | 5.2224E-08  |
| TNNT3         | 1.39643E-09 | 3.29402E-07 |
| TPD52L1       | 3.53361E-05 | 0.00245962  |
| TREM2         | 0.00119504  | 0.0434926   |
| TRIL          | 0.000724441 | 0.0296718   |
| TRIM7         | 7.84917E-05 | 0.00465036  |
| TRNP1         | 6.79758E-05 | 0.00416287  |
| TUBB4A        | 7.52166E-05 | 0.00449816  |
| TUFT1         | 0.000586369 | 0.0255793   |
| TULP1         | 6.39936E-07 | 8.15151E-05 |
| TYRO3         | 0           | 0           |
| UCMA          | 5.22275E-05 | 0.00337702  |
| UPB1          | 2.23332E-07 | 3.30791E-05 |
| UTS2R         | 3.8804E-05  | 0.00262918  |
| VIPR2         | 0.000487679 | 0.0220171   |
| VTCN1         | 0.00112096  | 0.0416292   |
| WISP1         | 6.3055E-05  | 0.00400094  |
| WNT2          | 3.03667E-09 | 6.78615E-07 |
| WTIP          | 0.000786101 | 0.0318897   |
| XPNPEP1       | 0.000681924 | 0.0284856   |
| ZCCHC18       | 8.55081E-05 | 0.00493277  |
| ZIM1          | 4.83462E-05 | 0.00314201  |
| 1190005I06RIK | 0.000169618 | 0.0069431   |

|               |              |             |
|---------------|--------------|-------------|
| 1810011H11RIK | 0.00144397   | 0.0369348   |
| 9330159F19RIK | 0.000245807  | 0.00920251  |
| A530064D06RIK | 0.000210951  | 0.0081442   |
| ACAN          | 9.658579E-10 | 2.14747E-07 |
| ACBD4         | 5.2514E-11   | 1.52389E-08 |
| ACO2          | 0.00116062   | 0.0311768   |
| ACTA1         | 7.51122E-08  | 1.05276E-05 |
| ACTG1         | 0.000924592  | 0.0261659   |
| ADAMTS17      | 0.000681336  | 0.0207149   |
| ADAMTSL2      | 1.03892E-08  | 1.76902E-06 |
| ADAP2         | 2.32363E-11  | 7.11008E-09 |
| ADIPOQ        | 1.42513E-10  | 3.79687E-08 |
| ADORA2B       | 0.000416223  | 0.0138465   |
| AGAP2         | 0.00148974   | 0.037738    |
| AI662270      | 2.40883E-08  | 3.84728E-06 |
| AKNAD1        | 0.000970775  | 0.0272249   |
| ALOX5AP       | 6.69541E-05  | 0.00335013  |
| ANGPT2        | 0.000237357  | 0.00896762  |
| ANGPTL7       | 0.000745823  | 0.0222594   |
| ANK1          | 0.00156839   | 0.0392271   |
| ANKRD1        | 0.000330009  | 0.0115648   |
| APOBEC1       | 0            | 0           |
| ARG1          | 3.0378E-08   | 4.68246E-06 |
| ARHGAP30      | 7.79354E-06  | 0.000562027 |
| ARHGAP9       | 1.45217E-05  | 0.000919657 |
| ARL4A         | 5.40632E-07  | 5.83184E-05 |
| ASPA          | 5.62827E-06  | 0.000424766 |
| ATF3          | 0.000153571  | 0.00640933  |
| ATP10B        | 0.000854833  | 0.0247134   |
| ATP6V0A4      | 0.0018917    | 0.0453025   |
| ATP8B4        | 8.45856E-06  | 0.00059615  |
| ATRX          | 0.0003896    | 0.0131426   |
| AURKB         | 0.000409069  | 0.0136969   |
| AVPR1A        | 7.47884E-06  | 0.000546415 |
| B4GALNT1      | 0.000687158  | 0.020815    |
| B4GALT5       | 5.5405E-11   | 1.60027E-08 |
| BB218582      | 0.000520263  | 0.0166619   |
| BC029214      | 9.94071E-06  | 0.000677437 |
| BIRC5         | 3.85845E-06  | 0.000312385 |
| BMPR1B        | 9.35161E-09  | 1.61459E-06 |
| C1QA          | 0.000411704  | 0.0137628   |
| C1QB          | 2.12591E-05  | 0.00126106  |
| C1QC          | 3.9505E-05   | 0.00213818  |
| C3AR1         | 2.74594E-07  | 3.33451E-05 |
| C4B           | 0.00118491   | 0.0317054   |
| C530008M17RIK | 0.000188522  | 0.00751292  |
| C6            | 0.00118761   | 0.0317501   |

|         |             |             |
|---------|-------------|-------------|
| C7      | 1.31939E-12 | 5.26138E-10 |
| CACNA1G | 7.88862E-09 | 1.38916E-06 |
| CAR3    | 0.00143668  | 0.0368291   |
| CASK    | 1.40572E-08 | 2.34832E-06 |
| CCBE1   | 0.00013585  | 0.00582711  |
| CCDC141 | 0.00033638  | 0.0117314   |
| CCDC28A | 2.9875E-09  | 5.97597E-07 |
| CCDC42  | 0.000153536 | 0.00640933  |
| CCDC88B | 0.00113513  | 0.0307056   |
| CCK     | 7.99801E-05 | 0.00384713  |
| CCL2    | 2.16271E-13 | 1.06093E-10 |
| CCL22   | 0.00014869  | 0.00626057  |
| CCL27A  | 4.44089E-16 | 3.22931E-13 |
| CCL4    | 0.000893048 | 0.0254727   |
| CCL7    | 1.38847E-10 | 3.73137E-08 |
| CCL8    | 0.00136557  | 0.0354916   |
| CCL9    | 3.60228E-06 | 0.00029491  |
| CCR1    | 1.16695E-06 | 0.000114129 |
| CCR5    | 6.81488E-11 | 1.95013E-08 |
| CCR9    | 0.000994741 | 0.0277084   |
| CD14    | 4.40847E-07 | 4.87456E-05 |
| CD200R1 | 0.00131434  | 0.0344965   |
| CD209A  | 0.000859708 | 0.0248079   |
| CD300LD | 0.000968561 | 0.0271751   |
| CD33    | 0.00127835  | 0.0337017   |
| CD38    | 0.00126344  | 0.0334161   |
| CD52    | 9.15507E-06 | 0.000635815 |
| CD53    | 1.77078E-05 | 0.00108278  |
| CD59A   | 1.19435E-07 | 1.60834E-05 |
| CD5L    | 5.02069E-06 | 0.000389099 |
| CD80    | 2.22045E-16 | 1.69439E-13 |
| CD83    | 0.00162345  | 0.0402186   |
| CDH18   | 0.00193442  | 0.0460403   |
| CDKN1A  | 0.000514504 | 0.0164946   |
| CERS6   | 0.00119698  | 0.0319316   |
| CES1D   | 0           | 0           |
| CFP     | 0.0018266   | 0.0441009   |
| CH25H   | 5.83212E-09 | 1.06337E-06 |
| CHDH    | 6.78744E-09 | 1.21911E-06 |
| CHRD1   | 8.01335E-06 | 0.000572796 |
| CIDEA   | 5.40311E-05 | 0.00280408  |
| CLCA3A1 | 0.00113317  | 0.0306796   |
| CLEC12A | 2.22546E-10 | 5.63752E-08 |
| CLEC3B  | 0.000252475 | 0.00936997  |
| CLEC4A2 | 4.25215E-07 | 4.74308E-05 |
| CLEC4D  | 1.92851E-06 | 0.000176073 |
| CLEC4E  | 1.68432E-05 | 0.00104316  |



|               |             |             |
|---------------|-------------|-------------|
| CLEC5A        | 9.16625E-06 | 0.000635876 |
| CLEC7A        | 3.00043E-07 | 3.58024E-05 |
| CNTRL         | 0.00118998  | 0.0317998   |
| COL2A1        | 8.70823E-05 | 0.00411825  |
| COL6A6        | 9.0976E-06  | 0.00063396  |
| COL8A1        | 2.22506E-07 | 2.77841E-05 |
| CPEB2         | 0.00104875  | 0.0288009   |
| CRABP2        | 3.08922E-05 | 0.00173744  |
| CRIM1         | 0.000218861 | 0.00840238  |
| CRLF1         | 4.44089E-16 | 3.22931E-13 |
| CSF2RA        | 0.001016    | 0.0281737   |
| CSF2RB        | 7.94899E-06 | 0.000569985 |
| CSF3          | 8.22843E-05 | 0.00392135  |
| CTSS          | 2.68254E-11 | 8.08819E-09 |
| CX3CL1        | 5.30427E-06 | 0.00040677  |
| CX3CR1        | 8.82195E-06 | 0.000618938 |
| CXCL1         | 1.09881E-09 | 2.42562E-07 |
| CXCL2         | 6.24841E-09 | 1.13259E-06 |
| CXCL3         | 2.10158E-05 | 0.00124903  |
| CXCR2         | 3.45556E-06 | 0.000285928 |
| CXCR4         | 3.95299E-07 | 4.43531E-05 |
| CYSLTR1       | 0.000475677 | 0.0155267   |
| CYTH4         | 1.04129E-06 | 0.000103643 |
| CYTL1         | 0.000574501 | 0.0180528   |
| DAPK2         | 0.000543807 | 0.0172994   |
| DCLRE1C       | 2.68694E-07 | 3.26929E-05 |
| DCTD          | 0.000581697 | 0.0182418   |
| DEPDC1A       | 2.54457E-07 | 3.12064E-05 |
| DLGAP1        | 6.65948E-09 | 1.20357E-06 |
| DLGAP5        | 0.000282944 | 0.0102754   |
| DOCK8         | 0.00149391  | 0.0378127   |
| DOK2          | 7.79317E-07 | 8.04167E-05 |
| DRP2          | 0.00117368  | 0.031473    |
| DTNB          | 0.00135057  | 0.0352232   |
| DUSP5         | 0.00111477  | 0.0302607   |
| E130006D01RIK | 3.5043E-06  | 0.000288801 |
| E2F7          | 0.00147598  | 0.0374662   |
| EAF2          | 0.000744647 | 0.0222351   |
| EAR2          | 0.000820343 | 0.0239176   |
| EDF1          | 0.000112336 | 0.00504246  |
| EGR2          | 0.000975073 | 0.0273082   |
| EHD4          | 6.79427E-07 | 7.09381E-05 |
| ENPP3         | 0.000649754 | 0.019892    |
| EP400         | 0.000883792 | 0.0253011   |
| EPHA1         | 0.00200269  | 0.0473008   |
| EREG          | 0.00188933  | 0.0452984   |
| ESM1          | 9.91865E-09 | 1.70298E-06 |

|         |             |             |
|---------|-------------|-------------|
| ETV1    | 1.95653E-08 | 3.18245E-06 |
| ETV4    | 9.42006E-07 | 9.45217E-05 |
| ETV5    | 2.33147E-13 | 1.11712E-10 |
| ETV6    | 1.16246E-05 | 0.000772686 |
| EVC     | 7.42487E-05 | 0.00365101  |
| F10     | 0.000297818 | 0.0106962   |
| F13A1   | 2.2001E-06  | 0.000196231 |
| FAIM2   | 0.000699118 | 0.0210998   |
| FAM105A | 0.00076281  | 0.022657    |
| FAM132A | 1.30292E-05 | 0.000848612 |
| FAM13A  | 1.8896E-12  | 7.29976E-10 |
| FAM64A  | 0.000677886 | 0.0206291   |
| FAM78B  | 0.00155723  | 0.0390252   |
| FASN    | 0           | 0           |
| FBN1    | 4.85139E-06 | 0.00037814  |
| FCER1G  | 0.0013176   | 0.0345674   |
| FCGR4   | 0.000106891 | 0.00485091  |
| FCRLS   | 5.12824E-10 | 1.21914E-07 |
| FGD2    | 4.65869E-08 | 6.83976E-06 |
| FGD3    | 0.000502084 | 0.0162141   |
| FHL2    | 2.37276E-05 | 0.00137952  |
| FMNL1   | 1.32519E-05 | 0.000857867 |
| FOSL1   | 0.000369444 | 0.0126582   |
| FOXM1   | 0.000205094 | 0.00797286  |
| FPR2    | 0.000656766 | 0.0200567   |
| FUCA2   | 0.000509261 | 0.0164116   |
| G2E3    | 0.000799809 | 0.0234851   |
| GABRQ   | 1.15096E-07 | 1.55669E-05 |
| GAS1    | 0.000471575 | 0.0154141   |
| GATM    | 5.41971E-10 | 1.2786E-07  |
| GCNT4   | 1.93684E-09 | 4.04447E-07 |
| GDA     | 6.38041E-06 | 0.000476296 |
| GDE1    | 0.000911803 | 0.0258526   |
| GDF6    | 0.000694441 | 0.0209894   |
| GJA5    | 2.00064E-05 | 0.00119709  |
| GM14548 | 2.03868E-05 | 0.00121632  |
| GM15448 | 0.000841036 | 0.0244288   |
| GM28042 | 1.62777E-09 | 3.46357E-07 |
| GPR132  | 0.000673299 | 0.0205109   |
| GPR176  | 1.67816E-07 | 2.17457E-05 |
| GPR39   | 0.00213254  | 0.0495524   |
| GRIA4   | 5.03446E-05 | 0.00264384  |
| GRM3    | 0.000804759 | 0.0235633   |
| GRTP1   | 0.000127911 | 0.00554256  |
| GSTT1   | 7.08857E-06 | 0.000520362 |
| H2-AA   | 6.10547E-05 | 0.00311369  |
| H2-AB1  | 3.77089E-07 | 4.30829E-05 |

|         |             |             |
|---------|-------------|-------------|
| H2-DMA  | 6.31495E-13 | 2.69286E-10 |
| HAS1    | 2.22058E-08 | 3.56505E-06 |
| HAVCR2  | 1.96137E-05 | 0.0011793   |
| HCK     | 0.000188075 | 0.00749994  |
| HCLS1   | 1.36458E-10 | 3.68473E-08 |
| HDC     | 0.000326192 | 0.0114687   |
| HELLS   | 0.00138641  | 0.0358212   |
| HGF     | 0.00157818  | 0.039413    |
| HHIP    | 0.000290569 | 0.0105091   |
| HMOX1   | 0           | 0           |
| HPGDS   | 0.00146765  | 0.0373008   |
| IFI203  | 3.39702E-11 | 1.00464E-08 |
| IFIT1   | 0.00135465  | 0.0353145   |
| IFITM1  | 7.64657E-05 | 0.0037186   |
| IFNGR2  | 0.00106679  | 0.0292279   |
| IL10RA  | 8.35764E-06 | 0.000590383 |
| IL11    | 7.88883E-05 | 0.0038154   |
| IL1B    | 4.69691E-12 | 1.69775E-09 |
| IL1RN   | 1.27619E-09 | 2.79578E-07 |
| IL6     | 1.36082E-11 | 4.40379E-09 |
| ILDR2   | 1.44233E-06 | 0.000136107 |
| INPP5D  | 1.24609E-08 | 2.09E-06    |
| IRF8    | 2.6478E-07  | 3.22801E-05 |
| JUNB    | 0.000107712 | 0.004881    |
| KCNC4   | 4.20112E-05 | 0.00225018  |
| KCNG4   | 0.000499606 | 0.0161764   |
| KCNK13  | 0.00168777  | 0.041496    |
| KIF11   | 0.00174218  | 0.0425072   |
| KIF23   | 0.000134862 | 0.00580085  |
| KIF2C   | 2.33478E-05 | 0.00136016  |
| KIFC1   | 0.000240953 | 0.00906357  |
| KIFC5B  | 0.000323003 | 0.011402    |
| KLHDC7A | 0.000802954 | 0.023544    |
| KLK10   | 0.000118592 | 0.00524706  |
| KMO     | 0.000999898 | 0.027827    |
| KRT80   | 6.43929E-15 | 4.23418E-12 |
| LCLAT1  | 9.92428E-07 | 9.92589E-05 |
| LCN2    | 1.48569E-05 | 0.000936089 |
| LITAF   | 0.000381146 | 0.0129585   |
| LMO7    | 3.56392E-10 | 8.81144E-08 |
| LRP8    | 3.49976E-11 | 1.03009E-08 |
| LRRC17  | 1.80654E-05 | 0.00110229  |
| LTBP2   | 0           | 0           |
| LTBP4   | 1.55298E-10 | 4.05021E-08 |
| LY86    | 0.000161734 | 0.00666895  |
| LYPD1   | 0.00129054  | 0.0339585   |
| LYVE1   | 9.55187E-06 | 0.00065893  |

|         |             |             |
|---------|-------------|-------------|
| LYZ1    | 1.4963E-05  | 0.000941815 |
| LYZ2    | 3.74344E-07 | 4.29281E-05 |
| MADD    | 2.70758E-08 | 4.2476E-06  |
| MAF     | 0.000170759 | 0.0069739   |
| MAFB    | 0.00108474  | 0.0296009   |
| MAGI1   | 3.88251E-09 | 7.54648E-07 |
| MAN2A1  | 0.000190042 | 0.00756374  |
| MAOB    | 0.00121904  | 0.0324361   |
| MARCO   | 6.31161E-05 | 0.00318987  |
| MEGF11  | 0.000216868 | 0.00833987  |
| MKI67   | 0.000344187 | 0.0119585   |
| MN1     | 0.00190868  | 0.0456032   |
| MNDA    | 0.000935336 | 0.0263987   |
| MPEG1   | 1.1915E-10  | 3.27318E-08 |
| MRC1    | 5.59725E-06 | 0.000423459 |
| MS4A4C  | 0.000186333 | 0.00745934  |
| MS4A6C  | 0           | 0           |
| MTR     | 0.000244738 | 0.00917917  |
| MUP16   | 0.00166268  | 0.0409933   |
| MYLK2   | 1.47379E-10 | 3.89329E-08 |
| MYO1F   | 1.39987E-06 | 0.000132912 |
| NAIP5   | 0.00167449  | 0.0412188   |
| NAPSA   | 0.000486825 | 0.0158372   |
| NAT6    | 1.45084E-05 | 0.000919657 |
| NCAM1   | 2.03163E-05 | 0.00121328  |
| NCKAP1L | 2.0883E-06  | 0.000187887 |
| NDNF    | 4.61479E-07 | 5.06643E-05 |
| NDUFAB1 | 0.00114989  | 0.0309828   |
| NDUFS5  | 2.6789E-05  | 0.00153877  |
| NDUFV3  | 0.000931565 | 0.0263138   |
| NEURL3  | 8.13811E-06 | 0.000579441 |
| NIN     | 2.87166E-08 | 4.45974E-06 |
| NLRC3   | 6.23606E-05 | 0.00315685  |
| NLRP3   | 0.000330614 | 0.0115781   |
| NOTCH3  | 3.50395E-05 | 0.0019372   |
| NOV     | 0.00117563  | 0.0315081   |
| NOXO1   | 0.00027689  | 0.0100912   |
| NPAS2   | 0.00036338  | 0.0124781   |
| NPPA    | 7.04709E-06 | 0.000518622 |
| NPR1    | 4.72913E-09 | 8.91181E-07 |
| NPTX2   | 0.000126301 | 0.00549379  |
| NR2F2   | 8.88178E-16 | 6.31015E-13 |
| NRG1    | 0.000311571 | 0.0110743   |
| NTS     | 1.33462E-05 | 0.000861997 |
| NUF2    | 0.00181608  | 0.0438655   |
| OAS1G   | 6.89078E-05 | 0.00343483  |
| OAS3    | 7.93866E-06 | 0.000569906 |

|           |             |             |
|-----------|-------------|-------------|
| OASL2     | 2.24265E-14 | 1.30772E-11 |
| OLFR1033  | 0.000192985 | 0.0076273   |
| OLFR328   | 0.000248404 | 0.00927166  |
| OLR1      | 0.000512965 | 0.0164595   |
| OPTC      | 1.54341E-10 | 4.05021E-08 |
| OSM       | 3.95114E-06 | 0.000317581 |
| P2RX1     | 5.44152E-07 | 5.85958E-05 |
| P2RX4     | 0.000188056 | 0.00749994  |
| PAK3      | 0.000173618 | 0.00706475  |
| PAQR6     | 1.42205E-08 | 2.36919E-06 |
| PBK       | 9.32198E-05 | 0.00434534  |
| PCCB      | 4.58634E-06 | 0.000361123 |
| PCK1      | 5.65986E-05 | 0.0029153   |
| PCOLCE2   | 5.92165E-07 | 6.32154E-05 |
| PDE9A     | 0.000876196 | 0.0251662   |
| PDLIM4    | 1.13505E-05 | 0.000757639 |
| PDLIM5    | 0.000361954 | 0.0124499   |
| PEMT      | 0.000807172 | 0.0236116   |
| PIK3R5    | 1.27694E-05 | 0.000834937 |
| PILRB1    | 0.00122257  | 0.0325018   |
| PLA2G4F   | 0.000383022 | 0.0130009   |
| PLA2G5    | 5.77168E-06 | 0.000434528 |
| PLAC8     | 0.000326126 | 0.0114687   |
| PLD4      | 0.000500554 | 0.0161816   |
| PLEKHB1   | 0.000492381 | 0.015973    |
| PLIN1     | 0.00115294  | 0.0310469   |
| POLE      | 3.95382E-07 | 4.43531E-05 |
| PPP1R1B   | 2.61302E-08 | 4.12017E-06 |
| PPP1R3A   | 0.00109029  | 0.0296877   |
| PREX1     | 0.00206429  | 0.048295    |
| PRKCB     | 1.92353E-05 | 0.00116562  |
| PRND      | 0.000564914 | 0.0178059   |
| PROCA1    | 0.00170999  | 0.041914    |
| PRSS12    | 0.000192479 | 0.00762636  |
| PRSS23    | 0.00149973  | 0.0379133   |
| PTAFR     | 3.16982E-05 | 0.0017747   |
| PTGFR     | 6.08712E-05 | 0.00310946  |
| PTGS2     | 1.17916E-07 | 1.59135E-05 |
| PTPN6     | 1.4506E-11  | 4.64566E-09 |
| PTPRO     | 5.20886E-05 | 0.00271467  |
| PTX3      | 4.29957E-08 | 6.40582E-06 |
| PXYLP1    | 0.00146533  | 0.0372571   |
| PYDC4     | 0.000758632 | 0.0225546   |
| PYHIN1    | 0.000174716 | 0.00709542  |
| RAB11FIP1 | 3.28075E-06 | 0.000273661 |
| RAC2      | 0.00071838  | 0.0215444   |
| RARRES1   | 0.000503702 | 0.0162579   |

|           |             |             |
|-----------|-------------|-------------|
| RASAL2    | 0.000832815 | 0.0242241   |
| RASGRP2   | 7.5965E-07  | 7.85184E-05 |
| RBMS1     | 0.000892423 | 0.0254666   |
| RBP4      | 7.37425E-05 | 0.00363189  |
| RDH10     | 0.00186994  | 0.0449207   |
| RETNLG    | 0.000640414 | 0.0196642   |
| RGS16     | 5.92332E-05 | 0.00304087  |
| RGS17     | 1.7128E-10  | 4.44824E-08 |
| RNASEL    | 2.15105E-05 | 0.00127431  |
| RND1      | 0.000355119 | 0.0122762   |
| RNF180    | 0.000382928 | 0.0130009   |
| RNF19B    | 4.63627E-05 | 0.0024556   |
| RUNX1     | 1.06581E-13 | 5.53596E-11 |
| RYR2      | 0.000144898 | 0.00613436  |
| S100A8    | 5.06563E-05 | 0.00265569  |
| SAA3      | 2.40696E-13 | 1.14442E-10 |
| SAMSN1    | 0.000138514 | 0.00591268  |
| SBNO2     | 8.84951E-07 | 8.96702E-05 |
| SCARA5    | 0.000649764 | 0.019892    |
| SCD1      | 0.000149859 | 0.00630123  |
| SCIMP     | 0.00133864  | 0.0349709   |
| SDC3      | 0.000187462 | 0.00748515  |
| SELE      | 0.000769087 | 0.0227778   |
| SELENBP2  | 0.000891658 | 0.0254565   |
| SEPT11    | 2.81193E-11 | 8.43715E-09 |
| SERPINA1B | 0.000607104 | 0.0188568   |
| SERPINA1E | 3.15893E-07 | 3.74049E-05 |
| SERPINA3N | 1.72674E-06 | 0.000159298 |
| SERPINI1  | 8.82713E-07 | 8.96702E-05 |
| SFRP2     | 5.9508E-13  | 2.59027E-10 |
| SLAMF7    | 0.000180263 | 0.00726815  |
| SLC16A11  | 1.41808E-06 | 0.000134435 |
| SLC25A23  | 2.14091E-09 | 4.41099E-07 |
| SLC2A6    | 3.83187E-05 | 0.00208676  |
| SLC38A4   | 0.000118776 | 0.00525147  |
| SLC4A10   | 0.000949479 | 0.026749    |
| SLC6A6    | 3.85905E-05 | 0.00209419  |
| SLFN1     | 0.000123199 | 0.00539685  |
| SLFN2     | 0.000139113 | 0.00593416  |
| SLFN5     | 0.000668951 | 0.0203936   |
| SLFN9     | 0.000701586 | 0.0211433   |
| SLIT3     | 0.000135591 | 0.00582653  |
| SNCG      | 2.07397E-05 | 0.00123618  |
| SND1      | 6.62507E-06 | 0.000492182 |
| SOCS3     | 2.96393E-10 | 7.41702E-08 |
| SPAG5     | 0.000748593 | 0.0223314   |
| SPI1      | 3.08642E-14 | 1.73429E-11 |

|           |             |             |
|-----------|-------------|-------------|
| SPOCK2    | 9.54266E-05 | 0.00442817  |
| SPP1      | 2.26041E-13 | 1.09797E-10 |
| SPRR1A    | 7.76393E-05 | 0.00376975  |
| SPRY4     | 0.000114888 | 0.00513095  |
| STAP1     | 0.00100811  | 0.0280174   |
| STT3A     | 0.000421872 | 0.0140118   |
| TBXAS1    | 0.000167027 | 0.00686432  |
| TFRC      | 9.11318E-06 | 0.000633993 |
| TGM1      | 0.000301828 | 0.0108088   |
| THEMIS2   | 0.00039685  | 0.0133384   |
| THRSP     | 2.55352E-06 | 0.0002223   |
| THY1      | 0.000628368 | 0.0194197   |
| TIAM1     | 0.000186586 | 0.00746466  |
| TIFAB     | 2.11903E-06 | 0.000190098 |
| TKT       | 0.000199059 | 0.00781851  |
| TLL2      | 0.000578073 | 0.0181558   |
| TLR1      | 0.00164406  | 0.0406316   |
| TLR13     | 1.93787E-05 | 0.0011689   |
| TLR9      | 0.000887567 | 0.0253515   |
| TMEM215   | 9.57842E-10 | 2.13734E-07 |
| TMEM242   | 0.00155506  | 0.0389932   |
| TMEM35    | 0.000157067 | 0.0065244   |
| TMEM45B   | 0.00215278  | 0.0498552   |
| TMEM52    | 3.61631E-09 | 7.11235E-07 |
| TMEM8     | 0.001972    | 0.046703    |
| TNFRSF11B | 1.28406E-05 | 0.000838096 |
| TNFRSF1B  | 2.92312E-05 | 0.00166217  |
| TNFRSF23  | 6.9795E-05  | 0.00346787  |
| TNFSF8    | 1.38787E-05 | 0.000887116 |
| TNMD      | 0.000330932 | 0.0115826   |
| TNNT1     | 4.61025E-08 | 6.80095E-06 |
| TREM1     | 1.16295E-08 | 1.96938E-06 |
| TRIM58    | 0.00122507  | 0.0325403   |
| TRIM7     | 1.33895E-05 | 0.00086299  |
| TSPAN11   | 0.000244573 | 0.00917853  |
| TUBB3     | 0.000126552 | 0.00549696  |
| TUBB4A    | 0.00151363  | 0.0381868   |
| TULP4     | 0           | 0           |
| TYROBP    | 0.000259291 | 0.00957392  |
| UBASH3B   | 2.85813E-07 | 3.44368E-05 |
| UBE2C     | 0.00163893  | 0.0405371   |
| UCP1      | 1.63246E-05 | 0.00101921  |
| USE1      | 0.00172184  | 0.0421159   |
| USP13     | 0.000355391 | 0.0122788   |
| VAV1      | 1.73074E-09 | 3.6511E-07  |
| VCAM1     | 1.17975E-08 | 1.99236E-06 |
| VIPR2     | 3.07778E-11 | 9.19023E-09 |

|               |             |             |
|---------------|-------------|-------------|
| VSIG4         | 2.85259E-08 | 4.45249E-06 |
| VSTM2B        | 3.76594E-05 | 0.00205811  |
| WDR92         | 0.000207613 | 0.00804046  |
| WDR95         | 8.20852E-07 | 8.37242E-05 |
| WFDC17        | 1.40268E-05 | 0.000893811 |
| WNK4          | 0.00136767  | 0.0355042   |
| XIRP2         | 5.89669E-07 | 6.31672E-05 |
| XKR5          | 0.00196309  | 0.0465255   |
| ZC3H12A       | 0.000743181 | 0.022202    |
| 1190005I06RIK | 0.000433238 | 0.0139585   |
| 1700017B05RIK | 0.000145366 | 0.00569129  |
| 1810011H11RIK | 9.97423E-05 | 0.00418996  |
| 3425401B19RIK | 0.00204134  | 0.0482811   |
| 3632451O06RIK | 3.83546E-09 | 5.83166E-07 |
| 4930402H24RIK | 0.000196065 | 0.00731981  |
| 4932438A13RIK | 2.5406E-05  | 0.00133938  |
| 5031414D18RIK | 0.000141677 | 0.0055813   |
| 5031439G07RIK | 0.00065165  | 0.0193844   |
| 9330159F19RIK | 2.84927E-06 | 0.000207352 |
| A630001G21RIK | 8.55665E-09 | 1.20474E-06 |
| AB124611      | 3.01216E-08 | 3.7679E-06  |
| ABCA8B        | 1.62715E-08 | 2.16936E-06 |
| ABCC3         | 0.000530885 | 0.0164383   |
| ABCD2         | 0.000227963 | 0.00830333  |
| ABCG1         | 0.000783781 | 0.0225562   |
| ABHD14A       | 0.000506067 | 0.0158417   |
| ABL2          | 0.00213103  | 0.0499322   |
| ABR           | 0.000535059 | 0.016535    |
| ACAN          | 1.96183E-11 | 4.56271E-09 |
| ACAP1         | 8.39819E-08 | 9.26827E-06 |
| ACBD4         | 2.51306E-05 | 0.00132688  |
| ACKR2         | 0.000142182 | 0.00559768  |
| ACOD1         | 8.67694E-05 | 0.0037397   |
| ACSL1         | 2.54246E-05 | 0.00133938  |
| ACSS1         | 0.000104418 | 0.00435388  |
| ACTA1         | 1.88446E-05 | 0.00104076  |
| ACTG2         | 9.45495E-09 | 1.32232E-06 |
| ADAM12        | 4.6444E-05  | 0.00223826  |
| ADAM19        | 8.29959E-06 | 0.000521694 |
| ADAM5         | 9.36931E-05 | 0.0039942   |
| ADAMTS4       | 7.86425E-08 | 8.74045E-06 |
| ADAMTSL2      | 1.04031E-05 | 0.000629347 |
| ADAP2         | 4.21863E-12 | 1.12249E-09 |
| ADAR          | 1.53857E-08 | 2.06001E-06 |
| ADCY4         | 4.52246E-08 | 5.45083E-06 |
| ADGRE1        | 0           | 0           |
| ADGRE4        | 7.11652E-05 | 0.00317839  |



|          |             |             |
|----------|-------------|-------------|
| ADH1     | 1.36866E-08 | 1.84037E-06 |
| ADH7     | 6.52279E-10 | 1.13777E-07 |
| ADIPOQ   | 5.44269E-05 | 0.00253918  |
| ADPRHL1  | 0.00074253  | 0.0215467   |
| ADRA1A   | 0.00049069  | 0.0154564   |
| ADRA2A   | 1.16783E-05 | 0.000698708 |
| ADRA2C   | 2.2137E-08  | 2.84856E-06 |
| ADRB3    | 0.000160069 | 0.00618937  |
| AFF3     | 6.26567E-08 | 7.21932E-06 |
| AGAP2    | 4.20711E-08 | 5.12739E-06 |
| AI504432 | 0.00178781  | 0.0435643   |
| AI507597 | 0.000908514 | 0.0253782   |
| AI607873 | 3.65731E-08 | 4.51199E-06 |
| AI662270 | 5.19988E-07 | 4.62502E-05 |
| AIF1     | 0           | 0           |
| AIFM3    | 0.000753513 | 0.021805    |
| AKAP12   | 0.00016698  | 0.00643283  |
| AKAP9    | 0.001664    | 0.0411381   |
| AKNA     | 0.00124339  | 0.0329029   |
| AKR1C13  | 1.00765E-05 | 0.000613883 |
| ALB      | 4.6962E-05  | 0.00225803  |
| ALDH1A1  | 0.00140492  | 0.0359942   |
| ALDH3A1  | 0           | 0           |
| ALOX5    | 7.22743E-07 | 6.30343E-05 |
| ALOX5AP  | 1.93477E-10 | 3.77311E-08 |
| AMICA1   | 3.82794E-06 | 0.000268877 |
| AMZ1     | 1.64107E-07 | 1.67836E-05 |
| ANGPT2   | 5.10703E-15 | 2.39325E-12 |
| ANGPTL1  | 1.00434E-05 | 0.000612898 |
| ANGPTL4  | 0.000466281 | 0.0148329   |
| ANGPTL7  | 0           | 0           |
| ANK1     | 0.00161264  | 0.0401529   |
| ANK2     | 0.000310912 | 0.0107017   |
| ANK3     | 0.00130695  | 0.0341248   |
| ANKRD1   | 3.33175E-06 | 0.00024048  |
| ANKRD44  | 0.000797161 | 0.0228365   |
| ANXA1    | 0.00136961  | 0.035219    |
| AOAH     | 8.08414E-08 | 8.95315E-06 |
| APLNR    | 3.31497E-07 | 3.11622E-05 |
| APOBEC1  | 3.13801E-10 | 5.84723E-08 |
| APOBR    | 0.000107052 | 0.00444599  |
| ARAP2    | 1.94331E-08 | 2.53175E-06 |
| ARHGAP15 | 2.47957E-11 | 5.56088E-09 |
| ARHGAP19 | 0.000311363 | 0.0107076   |
| ARHGAP26 | 1.0079E-05  | 0.000613883 |
| ARHGAP30 | 0           | 0           |
| ARHGAP9  | 2.1696E-12  | 6.24954E-10 |

|               |             |             |
|---------------|-------------|-------------|
| ARID5A        | 1.17873E-05 | 0.000702929 |
| ARL11         | 7.42786E-05 | 0.00328705  |
| ARL4C         | 2.5537E-05  | 0.00134304  |
| ARMC3         | 4.5915E-05  | 0.00221958  |
| ARRB2         | 0           | 0           |
| ART3          | 0           | 0           |
| ASPA          | 2.71364E-05 | 0.00141296  |
| ASPH          | 6.87581E-11 | 1.45867E-08 |
| ATP10B        | 1.32214E-08 | 1.80284E-06 |
| ATP1A3        | 1.74275E-07 | 1.7651E-05  |
| ATP2B2        | 0           | 0           |
| ATP6V0E2      | 0.000728212 | 0.0212294   |
| ATP8B4        | 1.29295E-07 | 1.34645E-05 |
| ATRX          | 0.000105865 | 0.00440242  |
| ATXN1         | 1.77804E-10 | 3.51106E-08 |
| AU021092      | 0.000376242 | 0.0124742   |
| AURKA         | 0.000606882 | 0.018269    |
| AURKB         | 1.18146E-05 | 0.000703885 |
| AVPR1A        | 0.000377104 | 0.0124962   |
| B430306N03RIK | 1.40446E-07 | 1.44816E-05 |
| B4GALNT1      | 5.00867E-05 | 0.00237747  |
| B4GALNT3      | 1.29008E-07 | 1.3457E-05  |
| B4GALT5       | 8.16712E-05 | 0.00356133  |
| BASP1         | 0.00129344  | 0.0338002   |
| BATF          | 0.000920734 | 0.0256738   |
| BAZ1A         | 5.01574E-05 | 0.00237805  |
| BBS9          | 5.42386E-05 | 0.00253416  |
| BC028528      | 1.77894E-06 | 0.000137911 |
| BC094916      | 4.49275E-05 | 0.00218446  |
| BCL2A1B       | 2.67758E-07 | 2.59074E-05 |
| BCL3          | 5.14085E-09 | 7.61367E-07 |
| BDH2          | 2.22045E-16 | 1.26757E-13 |
| BDNF          | 0.000856533 | 0.0242389   |
| BEND5         | 2.21583E-05 | 0.00119129  |
| BID           | 0.00161709  | 0.0402319   |
| BIRC3         | 0.00126431  | 0.0332882   |
| BIRC5         | 2.19301E-08 | 2.83355E-06 |
| BLMH          | 0.000181372 | 0.00685274  |
| BMP6          | 2.32607E-06 | 0.000175139 |
| BMX           | 0.000291569 | 0.0101944   |
| BST1          | 0.00013287  | 0.00530301  |
| BTBD11        | 0.000467468 | 0.0148631   |
| BTK           | 7.25244E-06 | 0.000467574 |
| BUB1B         | 0.0010847   | 0.0292458   |
| C1QA          | 1.44865E-09 | 2.35668E-07 |
| C1QB          | 3.80806E-12 | 1.03968E-09 |
| C1QC          | 1.18061E-12 | 3.64234E-10 |

|               |             |             |
|---------------|-------------|-------------|
| C1QTNF2       | 0.000990807 | 0.0272015   |
| C1QTNF3       | 7.82334E-08 | 8.71865E-06 |
| C330027C09RIK | 0.000219412 | 0.0080479   |
| C3AR1         | 1.33227E-15 | 6.91403E-13 |
| C4B           | 0.000167735 | 0.006454    |
| C6            | 5.54661E-08 | 6.49365E-06 |
| C7            | 0           | 0           |
| CACNA1G       | 1.37224E-12 | 4.10331E-10 |
| CACNA2D3      | 0.000385825 | 0.0127292   |
| CALML4        | 6.45424E-05 | 0.00293479  |
| CAMK1D        | 0.000575385 | 0.017548    |
| CAMSAP3       | 0.00134283  | 0.0347868   |
| CAPZA2        | 0.000474867 | 0.0150375   |
| CAR8          | 0.00132164  | 0.0343797   |
| CARD11        | 2.08719E-05 | 0.00113085  |
| CASP4         | 0.000640786 | 0.0190974   |
| CASQ2         | 3.80616E-05 | 0.0018999   |
| CASS4         | 5.31819E-08 | 6.24216E-06 |
| CCDC141       | 0.00065647  | 0.0195092   |
| CCDC88B       | 7.99272E-12 | 2.00278E-09 |
| CCL11         | 0.000127685 | 0.00513643  |
| CCL12         | 1.55165E-12 | 4.59602E-10 |
| CCL2          | 1.68472E-11 | 3.99215E-09 |
| CCL22         | 7.1836E-05  | 0.00320174  |
| CCL4          | 0.000450685 | 0.0144097   |
| CCL5          | 1.45211E-06 | 0.000116904 |
| CCL6          | 0           | 0           |
| CCL7          | 7.99361E-15 | 3.71821E-12 |
| CCL8          | 3.10862E-15 | 1.51323E-12 |
| CCL9          | 1.52246E-07 | 1.56469E-05 |
| CCM2L         | 5.79662E-08 | 6.71585E-06 |
| CCNA2         | 0.000252391 | 0.00903585  |
| CCNB2         | 4.88389E-05 | 0.00233043  |
| CCNF          | 2.41409E-05 | 0.00127926  |
| CCR1          | 1.30673E-12 | 3.94501E-10 |
| CCR5          | 6.63913E-14 | 2.51147E-11 |
| CCR7          | 0.000701164 | 0.0206421   |
| CD14          | 1.84619E-08 | 2.42535E-06 |
| CD163L1       | 4.48286E-09 | 6.70241E-07 |
| CD19          | 3.54635E-08 | 4.39236E-06 |
| CD2           | 0.000220716 | 0.00808626  |
| CD200R1       | 0.000962896 | 0.026543    |
| CD209A        | 2.27268E-06 | 0.000171736 |
| CD209F        | 3.84787E-06 | 0.000269673 |
| CD244         | 0.000450364 | 0.0144068   |
| CD300A        | 3.68028E-06 | 0.000261429 |
| CD300C2       | 0           | 0           |

|          |              |             |
|----------|--------------|-------------|
| CD300LD  | 1.85237E-07  | 1.86111E-05 |
| CD300LD3 | 1.23315E-06  | 0.000101355 |
| CD300LD4 | 4.83013E-05  | 0.00230846  |
| CD300LD5 | 8.94735E-06  | 0.000555736 |
| CD300LF  | 2.94542E-12  | 8.22034E-10 |
| CD33     | 1.09864E-09  | 1.83482E-07 |
| CD38     | 0.000667181  | 0.0197714   |
| CD3D     | 0.000880406  | 0.0247693   |
| CD3E     | 0.000135661  | 0.00539849  |
| CD3G     | 0.000345406  | 0.0116615   |
| CD40     | 0.000495838  | 0.0155837   |
| CD44     | 1.09416E-09  | 1.83221E-07 |
| CD48     | 3.45004E-10  | 6.39072E-08 |
| CD5      | 0.00032914   | 0.0112145   |
| CD52     | 2.41815E-11  | 5.46908E-09 |
| CD53     | 1.42109E-14  | 6.32887E-12 |
| CD69     | 0.000181021  | 0.00684964  |
| CD79A    | 0.000402918  | 0.0131782   |
| CD79B    | 2.99359E-05  | 0.00154489  |
| CD80     | 0.000119742  | 0.00487309  |
| CD83     | 1.06569E-08  | 1.48712E-06 |
| CD84     | 2.22045E-16  | 1.26757E-13 |
| CD86     | 6.36074E-08  | 7.31544E-06 |
| CD8A     | 5.08236E-08  | 6.02164E-06 |
| CD8B1    | 0.00141908   | 0.0362242   |
| CDCA2    | 0.00135799   | 0.035086    |
| CDCA3    | 1.68874E-06  | 0.000131896 |
| CDCA5    | 0.0009954789 | 0.0272736   |
| CDCA8    | 8.40999E-05  | 0.00364462  |
| CDH6     | 0.000454509  | 0.0145025   |
| CDK1     | 6.09776E-09  | 8.86364E-07 |
| CDK6     | 1.10705E-07  | 1.18026E-05 |
| CDKN1A   | 2.8957E-05   | 0.00150153  |
| CDKN1C   | 6.4253E-08   | 7.34931E-06 |
| CEACAM1  | 1.00649E-09  | 1.71281E-07 |
| CELF1    | 4.38754E-06  | 0.000302101 |
| CEMIP    | 5.0244E-07   | 4.48276E-05 |
| CENPE    | 6.73575E-05  | 0.00302988  |
| CENPI    | 0.00197756   | 0.0471718   |
| CEP192   | 4.99191E-05  | 0.00237295  |
| CEP55    | 6.94888E-06  | 0.0004524   |
| CEP85    | 0.000440453  | 0.0141547   |
| CERS6    | 0.000116956  | 0.00478764  |
| CFI      | 0.000396482  | 0.0130283   |
| CFP      | 3.99375E-07  | 3.68806E-05 |
| CH25H    | 2.29417E-07  | 2.24747E-05 |
| CHAD     | 0            | 0           |

|         |             |             |
|---------|-------------|-------------|
| CHIL3   | 7.35391E-06 | 0.000472176 |
| CHL1    | 0.00148323  | 0.037617    |
| CHRD    | 0.000616109 | 0.0185113   |
| CHRD1   | 1.34209E-05 | 0.000781062 |
| CIITA   | 7.94698E-08 | 8.8168E-06  |
| CILP    | 1.23712E-07 | 1.29691E-05 |
| CKAP2L  | 0.000203723 | 0.00756521  |
| CLASP2  | 0.00014021  | 0.0055409   |
| CLEC12A | 0           | 0           |
| CLEC1A  | 1.62057E-05 | 0.00091549  |
| CLEC2I  | 0.000100399 | 0.00420992  |
| CLEC3A  | 2.58429E-07 | 2.51208E-05 |
| CLEC3B  | 9.34808E-07 | 7.9326E-05  |
| CLEC4A1 | 1.68003E-11 | 3.99215E-09 |
| CLEC4A2 | 3.55271E-15 | 1.703E-12   |
| CLEC4D  | 1.57661E-06 | 0.000124376 |
| CLEC4E  | 0.00136931  | 0.035219    |
| CLEC5A  | 1.04252E-06 | 8.71707E-05 |
| CLEC7A  | 7.71427E-09 | 1.10346E-06 |
| CNR2    | 4.44506E-06 | 0.000305726 |
| CNTFR   | 8.84183E-09 | 1.24211E-06 |
| CNTN6   | 4.78009E-09 | 7.11293E-07 |
| CNTRL   | 7.09862E-06 | 0.000460018 |
| COL11A1 | 4.2179E-10  | 7.61101E-08 |
| COL11A2 | 7.29301E-07 | 6.3518E-05  |
| COL12A1 | 1.95437E-05 | 0.00107277  |
| COL19A1 | 1.67948E-07 | 1.71206E-05 |
| COL6A6  | 3.47697E-08 | 4.31495E-06 |
| COL8A1  | 7.38988E-06 | 0.000474001 |
| CORO1A  | 0           | 0           |
| CORO2A  | 3.10613E-07 | 2.95082E-05 |
| CORO2B  | 7.69578E-05 | 0.00338178  |
| COTL1   | 1.14078E-10 | 2.3642E-08  |
| CRABP2  | 0.00052588  | 0.0163466   |
| CRACR2B | 0.000136445 | 0.00542273  |
| CRLF1   | 0           | 0           |
| CRLF2   | 0.000791034 | 0.0227232   |
| CSDC2   | 0.000303236 | 0.0105203   |
| CSF2RA  | 1.93384E-05 | 0.00106429  |
| CSF2RB  | 1.83868E-08 | 2.42054E-06 |
| CSF2RB2 | 4.63485E-07 | 4.16971E-05 |
| CSMD1   | 0.00111159  | 0.0298638   |
| CTHRC1  | 2.44249E-15 | 1.21727E-12 |
| CTLA2B  | 0.000238087 | 0.00858926  |
| CTSS    | 0           | 0           |
| CX3CL1  | 0.000178399 | 0.00679356  |
| CX3CR1  | 1.11022E-15 | 5.85853E-13 |

|               |             |             |
|---------------|-------------|-------------|
| CXADR         | 0.000869236 | 0.024521    |
| CXCL1         | 0.000197761 | 0.00736998  |
| CXCL10        | 0           | 0           |
| CXCL13        | 1.32106E-08 | 1.80284E-06 |
| CXCL14        | 2.80144E-06 | 0.000204554 |
| CXCL2         | 0.00201651  | 0.0477837   |
| CXCL9         | 3.08642E-14 | 1.2504E-11  |
| CXCR2         | 2.08191E-07 | 2.07185E-05 |
| CXCR3         | 4.53445E-05 | 0.00219707  |
| CXCR4         | 4.14654E-05 | 0.00203742  |
| CXCR6         | 1.55537E-06 | 0.000123476 |
| CYLD          | 3.05763E-10 | 5.73147E-08 |
| CYP4F16       | 9.88588E-06 | 0.000605053 |
| CYP4F18       | 1.86901E-08 | 2.45013E-06 |
| CYP51         | 0.000292697 | 0.0102206   |
| CYS1          | 4.31243E-06 | 0.000297908 |
| CYSLTR1       | 1.94636E-05 | 0.00106931  |
| CYTH1         | 0.000882773 | 0.0248137   |
| CYTH4         | 5.77316E-14 | 2.21052E-11 |
| CYTIP         | 5.72388E-08 | 6.65614E-06 |
| CYTL1         | 1.58313E-11 | 3.77996E-09 |
| D630003M21RIK | 3.66767E-08 | 4.51591E-06 |
| D8ERTD82E     | 0.000460422 | 0.0146688   |
| DAPP1         | 0.00048366  | 0.0152774   |
| DBI           | 1.27965E-07 | 1.33703E-05 |
| DCK           | 1.40843E-05 | 0.0008114   |
| DDAH1         | 2.61207E-05 | 0.00136574  |
| DDAH2         | 0.000135286 | 0.00538698  |
| DDX58         | 2.19077E-08 | 2.83355E-06 |
| DENND1C       | 0.000213943 | 0.00788875  |
| DEPDC1A       | 5.61519E-05 | 0.00259926  |
| DGKG          | 4.556E-07   | 4.11646E-05 |
| DHH           | 7.72037E-06 | 0.00049153  |
| DIAPH3        | 2.08698E-07 | 2.07361E-05 |
| DIO2          | 8.40068E-07 | 7.24616E-05 |
| DIRAS2        | 6.07923E-07 | 5.35407E-05 |
| DLGAP5        | 0.000140013 | 0.00553658  |
| DLL1          | 0.000307547 | 0.0106346   |
| DNA2          | 0.00201117  | 0.0477155   |
| DNAJA1        | 3.33511E-13 | 1.1382E-10  |
| DNAJC17       | 0.000192826 | 0.00721605  |
| DNM1          | 0           | 0           |
| DNMT3A        | 1.94715E-06 | 0.000149111 |
| DOCK10        | 0.000845824 | 0.0240115   |
| DOCK2         | 7.47998E-06 | 0.000478623 |
| DOCK5         | 0.000325393 | 0.0111049   |
| DOCK8         | 5.17141E-06 | 0.000348432 |

|               |             |             |
|---------------|-------------|-------------|
| DOK2          | 2.45104E-10 | 4.66404E-08 |
| DOK3          | 0.000116611 | 0.00477978  |
| DOLPP1        | 0.000549113 | 0.0168875   |
| DPEP2         | 8.77567E-08 | 9.61725E-06 |
| DPYSL3        | 6.98432E-05 | 0.00313048  |
| DROSHA        | 1.57274E-12 | 4.63664E-10 |
| DTNB          | 5.3306E-05  | 0.00249616  |
| DTX2          | 0.00138685  | 0.0356184   |
| DUOXA1        | 6.44458E-10 | 1.12726E-07 |
| DUSP19        | 0.00105581  | 0.0285897   |
| DUSP27        | 0.00073142  | 0.0212932   |
| DUSP6         | 0.000158451 | 0.00613434  |
| E2F8          | 5.575E-06   | 0.000372824 |
| EBF4          | 5.65714E-06 | 0.000377915 |
| EBI3          | 2.98771E-05 | 0.00154414  |
| EDA           | 2.68183E-09 | 4.1788E-07  |
| EFEMP1        | 1.69987E-05 | 0.000955628 |
| EFHD1         | 0.000934037 | 0.0258953   |
| EGR3          | 0.000438933 | 0.0141131   |
| EIF1A         | 5.18209E-09 | 7.65207E-07 |
| EIF2AK2       | 0.00178215  | 0.0434434   |
| EIF4EBP2      | 0.000153122 | 0.00595006  |
| ELL2          | 0.00103736  | 0.0281995   |
| EMB           | 0.000204878 | 0.00759913  |
| ENPP3         | 2.18594E-09 | 3.44025E-07 |
| EPB41L3       | 1.33227E-15 | 6.91403E-13 |
| EPSTI1        | 2.08341E-10 | 4.0379E-08  |
| EPT1          | 2.5665E-05  | 0.00134639  |
| EREG          | 2.8716E-07  | 2.75722E-05 |
| ESCO2         | 0.00148569  | 0.0376642   |
| ESM1          | 1.61996E-08 | 2.16438E-06 |
| ESPN          | 0.000624229 | 0.0186837   |
| ETV5          | 0.00124579  | 0.0329525   |
| EVI2A         | 0           | 0           |
| EXOC5         | 9.50156E-05 | 0.00403961  |
| F10           | 0.000102142 | 0.00427317  |
| F13A1         | 8.21565E-15 | 3.76571E-12 |
| F3            | 1.22182E-05 | 0.00072245  |
| F630028O10RIK | 0.00122809  | 0.0326349   |
| FADS3         | 0.000889835 | 0.0249525   |
| FAIM2         | 7.27514E-06 | 0.000467597 |
| FAM105A       | 1.28666E-11 | 3.13821E-09 |
| FAM107A       | 0           | 0           |
| FAM110C       | 4.93405E-05 | 0.00235257  |
| FAM198A       | 2.51228E-09 | 3.92434E-07 |
| FAM19A5       | 6.4484E-12  | 1.64605E-09 |
| FAM26F        | 0.000816608 | 0.0233298   |

|         |             |             |
|---------|-------------|-------------|
| FAM49B  | 1.6135E-07  | 1.65285E-05 |
| FAM64A  | 0.000351037 | 0.0117942   |
| FAM65B  | 3.03458E-06 | 0.000220042 |
| FAR1    | 0.000189246 | 0.007111174 |
| FBLN1   | 0           | 0           |
| FBXL22  | 0.000587412 | 0.0177766   |
| FBXO30  | 3.79451E-10 | 6.90655E-08 |
| FBXO31  | 0.000730746 | 0.0212835   |
| FCER1G  | 6.18509E-10 | 1.08585E-07 |
| FCGR1   | 0           | 0           |
| FCGR2B  | 0           | 0           |
| FCGR4   | 1.30812E-09 | 2.15232E-07 |
| FCNA    | 0           | 0           |
| FCRLS   | 0           | 0           |
| FERMT3  | 4.73207E-05 | 0.00227179  |
| FES     | 6.66113E-05 | 0.00300492  |
| FFAR2   | 9.94599E-05 | 0.00418819  |
| FGD3    | 3.18443E-09 | 4.90113E-07 |
| FGF1    | 1.95399E-14 | 8.46214E-12 |
| FGF2    | 1.14805E-10 | 2.37144E-08 |
| FGFR4   | 0.00185217  | 0.0448715   |
| FGR     | 0           | 0           |
| FHL2    | 5.52158E-12 | 1.4387E-09  |
| FHL3    | 1.26335E-09 | 2.08768E-07 |
| FIBIN   | 2.38182E-06 | 0.000178693 |
| FMNL1   | 3.08642E-14 | 1.2504E-11  |
| FMO2    | 0.00199889  | 0.0475363   |
| FMO3    | 0.00118715  | 0.0316549   |
| FNDC1   | 6.60542E-05 | 0.00299053  |
| FNDC4   | 0.00197368  | 0.0471066   |
| FOLH1   | 2.5091E-14  | 1.05039E-11 |
| FOLR2   | 2.26998E-10 | 4.35913E-08 |
| FOS     | 7.66486E-05 | 0.00337055  |
| FOXD1   | 4.98249E-06 | 0.000337878 |
| FOXM1   | 0.000105933 | 0.00440242  |
| FOXP2   | 0.000124252 | 0.00502409  |
| FOXRED2 | 7.04134E-05 | 0.00314705  |
| FPR2    | 0.00193375  | 0.0464004   |
| FRYL    | 0.000923142 | 0.0257002   |
| FST     | 3.7963E-12  | 1.03968E-09 |
| FUCA2   | 6.4457E-05  | 0.00293303  |
| FXYD5   | 5.55313E-08 | 6.49365E-06 |
| G3BP2   | 0.000324943 | 0.0110956   |
| GALNT12 | 0.000117683 | 0.00480801  |
| GALNT15 | 1.38829E-06 | 0.000112925 |
| GAS1    | 8.89662E-07 | 7.63201E-05 |
| GATA2   | 0.000484951 | 0.0153047   |



|         |             |             |
|---------|-------------|-------------|
| GATM    | 0           | 0           |
| GBP4    | 1.57656E-05 | 0.00089431  |
| GCNT4   | 8.88178E-16 | 4.76694E-13 |
| GCSAM   | 0.000401458 | 0.0131505   |
| GFOD1   | 0.000426654 | 0.0138102   |
| GIMAP3  | 0.000640462 | 0.0190968   |
| GIPC2   | 2.80017E-05 | 0.0014544   |
| GJA1    | 1.51165E-05 | 0.000861383 |
| GJA5    | 2.95257E-11 | 6.52841E-09 |
| GK      | 3.49486E-06 | 0.00024967  |
| GKN3    | 1.31466E-05 | 0.000767947 |
| GLI1    | 0.00140159  | 0.0359383   |
| GLIPR1  | 4.37272E-07 | 3.98837E-05 |
| GLIS3   | 0.000210441 | 0.00777791  |
| GLUL    | 0.00164617  | 0.0407615   |
| GM13304 | 0.00127773  | 0.0334976   |
| GM13305 | 0.000729477 | 0.0212564   |
| GM14085 | 1.26966E-06 | 0.00010422  |
| GM14548 | 5.93E-07    | 5.22997E-05 |
| GM21975 | 5.59042E-12 | 1.45062E-09 |
| GM28042 | 0.000533085 | 0.0164902   |
| GM5431  | 4.2619E-11  | 9.26042E-09 |
| GM5820  | 1.0079E-05  | 0.000613883 |
| GMFG    | 3.85469E-12 | 1.04786E-09 |
| GMIP    | 9.20709E-09 | 1.29053E-06 |
| GNA15   | 4.07529E-05 | 0.00201096  |
| GNG2    | 4.00749E-07 | 3.6953E-05  |
| GOT1    | 0.00025526  | 0.00912298  |
| GPBAR1  | 4.83096E-05 | 0.00230846  |
| GPCPD1  | 0.000444109 | 0.0142503   |
| GPNMB   | 5.59382E-09 | 8.18798E-07 |
| GPR132  | 4.41611E-07 | 4.01316E-05 |
| GPR141  | 0.000120161 | 0.00488066  |
| GPR160  | 5.77461E-08 | 6.70271E-06 |
| GPR171  | 0.000310008 | 0.0106961   |
| GPR176  | 1.75193E-13 | 6.18048E-11 |
| GPR183  | 6.0575E-06  | 0.000401804 |
| GPR34   | 2.43938E-12 | 6.96277E-10 |
| GPR65   | 1.47941E-07 | 1.52295E-05 |
| GPRC5C  | 4.56499E-08 | 5.49154E-06 |
| GRHPR   | 9.36262E-05 | 0.00399406  |
| GSTA3   | 2.81997E-13 | 9.83777E-11 |
| GSTM1   | 1.55431E-15 | 7.93521E-13 |
| GSTT1   | 3.78417E-06 | 0.000267297 |
| GTSE1   | 0.000413349 | 0.0134628   |
| GXYLT2  | 0.000105714 | 0.00439915  |
| GZMB    | 0.00140453  | 0.0359942   |

|          |             |             |
|----------|-------------|-------------|
| H2-AA    | 1.79328E-10 | 3.53007E-08 |
| H2-AB1   | 1.28937E-11 | 3.13821E-09 |
| H2-DMA   | 5.35127E-14 | 2.08716E-11 |
| H2-DMB1  | 9.25641E-08 | 1.0039E-05  |
| H2-DMB2  | 4.94055E-09 | 7.33432E-07 |
| H2-EB1   | 0           | 0           |
| H2-OA    | 0.000178317 | 0.00679356  |
| H2-OB    | 3.44882E-07 | 3.21796E-05 |
| HAAO     | 0.00125014  | 0.0330397   |
| HAVCR2   | 9.78906E-12 | 2.42966E-09 |
| HBEGF    | 0.000898476 | 0.0251239   |
| HCK      | 2.91926E-11 | 6.47757E-09 |
| HCLS1    | 1.11022E-15 | 5.85853E-13 |
| HCST     | 0.00126027  | 0.0332235   |
| HDAC5    | 2.59281E-08 | 3.28257E-06 |
| HDC      | 0.000400764 | 0.0131415   |
| HGF      | 3.7515E-05  | 0.0018771   |
| HHIP     | 3.5083E-14  | 1.39433E-11 |
| HIPK2    | 3.09086E-07 | 2.94076E-05 |
| HK3      | 9.31738E-06 | 0.000575305 |
| HLF      | 0.000616687 | 0.0185198   |
| HMCN2    | 2.22045E-16 | 1.26757E-13 |
| HMGA1    | 1.36568E-08 | 1.84029E-06 |
| HMGB3    | 0.000544932 | 0.0167921   |
| HMGCR    | 0.000577375 | 0.0175745   |
| HMMR     | 0.000114311 | 0.00471009  |
| HMOX1    | 8.55501E-06 | 0.000534539 |
| HNRNPH1  | 1.95035E-06 | 0.000149175 |
| HOXA9    | 0.000829755 | 0.0236301   |
| HOXB8    | 0.000527149 | 0.0163604   |
| HP       | 1.34775E-08 | 1.82396E-06 |
| HPGDS    | 4.59151E-08 | 5.50237E-06 |
| HS3ST1   | 0.000706193 | 0.0207512   |
| HS6ST2   | 1.21863E-06 | 0.000100425 |
| HSPA12B  | 6.40558E-08 | 7.34931E-06 |
| HSPA4L   | 1.17142E-05 | 0.000699363 |
| HSPB6    | 0.000581926 | 0.0176787   |
| HTR2A    | 0.00106199  | 0.0287324   |
| HTRA3    | 1.02863E-07 | 1.10604E-05 |
| HTRA4    | 2.11251E-05 | 0.00114161  |
| IBSP     | 2.24617E-07 | 2.20388E-05 |
| ICAM2    | 4.44089E-16 | 2.46784E-13 |
| ICAM5    | 0.00175983  | 0.0429659   |
| ICT1     | 3.37264E-12 | 9.2888E-10  |
| IFI203   | 6.66134E-16 | 3.60602E-13 |
| IFI205   | 9.3063E-06  | 0.000575186 |
| IFI27L2A | 0.00142648  | 0.0363492   |

|          |             |             |
|----------|-------------|-------------|
| IFI30    | 0.000270929 | 0.00957939  |
| IFI44    | 0.00016827  | 0.00647062  |
| IFIT1    | 8.24559E-06 | 0.000519862 |
| IFIT1BL1 | 1.20045E-08 | 1.65675E-06 |
| IFITM1   | 1.17724E-07 | 1.24034E-05 |
| IFNAR2   | 0.00167311  | 0.0412383   |
| IGF1     | 2.12012E-07 | 2.09989E-05 |
| IGSF10   | 9.84073E-05 | 0.00415288  |
| IGSF6    | 3.44764E-07 | 3.21796E-05 |
| IKZF3    | 3.42702E-05 | 0.00173408  |
| IL10RA   | 0           | 0           |
| IL11RA1  | 4.81104E-10 | 8.60709E-08 |
| IL18R1   | 0.000113281 | 0.00467991  |
| IL18RAP  | 3.22376E-09 | 4.93746E-07 |
| IL1B     | 1.38862E-11 | 3.34094E-09 |
| IL1R2    | 6.08319E-06 | 0.000402947 |
| IL1RL1   | 3.81877E-05 | 0.00190468  |
| IL1RN    | 5.42336E-06 | 0.000364235 |
| IL20RB   | 0.000175924 | 0.0067156   |
| IL2RB    | 3.83875E-06 | 0.000269334 |
| IL2RG    | 5.11844E-05 | 0.00241482  |
| IL33     | 0.0014353   | 0.0365193   |
| IL4RA    | 2.04148E-12 | 5.90759E-10 |
| IL6      | 1.27302E-05 | 0.000746398 |
| IL6RA    | 0.00149463  | 0.0378297   |
| IL7R     | 3.34921E-06 | 0.000241462 |
| ILD2R2   | 0.000343521 | 0.01161     |
| INHBA    | 0.000297784 | 0.0103577   |
| INMT     | 7.54084E-09 | 1.08607E-06 |
| INPP4A   | 6.31606E-12 | 1.61884E-09 |
| INPP4B   | 0.000265059 | 0.00941353  |
| INPP5B   | 0.00156321  | 0.039155    |
| INPP5D   | 5.10703E-15 | 2.39325E-12 |
| IQGAP3   | 1.03219E-05 | 0.000625639 |
| IRF5     | 1.00951E-05 | 0.000614266 |
| IRF8     | 0           | 0           |
| ISG15    | 3.3925E-06  | 0.000244023 |
| ITCH     | 9.50812E-07 | 8.03583E-05 |
| ITGA3    | 1.72931E-06 | 0.000134396 |
| ITGAX    | 3.01159E-12 | 8.36783E-10 |
| ITGB2    | 0           | 0           |
| ITGB4    | 2.12026E-11 | 4.87699E-09 |
| ITGB7    | 1.12774E-07 | 1.19622E-05 |
| ITK      | 4.49451E-05 | 0.00218446  |
| ITM2A    | 0.000413014 | 0.0134589   |
| ITPRIPL1 | 0.000241682 | 0.0086985   |
| JAM2     | 1.01215E-05 | 0.000615276 |

|          |             |             |
|----------|-------------|-------------|
| JCHAIN   | 0           | 0           |
| KALRN    | 2.66454E-15 | 1.31748E-12 |
| KANK4    | 4.27841E-06 | 0.00029646  |
| KBTBD11  | 0.00196669  | 0.0469934   |
| KCNA6    | 4.20531E-09 | 6.3632E-07  |
| KCNAB2   | 8.97109E-08 | 9.76325E-06 |
| KCNC4    | 5.19619E-05 | 0.00244232  |
| KCNG4    | 0.000352217 | 0.0118275   |
| KCNJ15   | 0           | 0           |
| KHK      | 7.49785E-05 | 0.00330691  |
| KIF11    | 1.01702E-05 | 0.000617637 |
| KIF15    | 0.000314942 | 0.0108011   |
| KIF1B    | 0.0012621   | 0.0332579   |
| KIF21B   | 2.64188E-06 | 0.000194944 |
| KIF23    | 0.000677909 | 0.0200478   |
| KIF26B   | 0           | 0           |
| KIF2C    | 6.20835E-06 | 0.000409941 |
| KIF4     | 2.77649E-05 | 0.00144449  |
| KIFC3    | 1.86529E-09 | 2.97286E-07 |
| KLK10    | 0           | 0           |
| KLK11    | 8.32841E-06 | 0.000522983 |
| KLK8     | 3.40586E-07 | 3.18734E-05 |
| KLRA2    | 1.87139E-05 | 0.00103536  |
| KLRD1    | 0.000473006 | 0.0149861   |
| KLRK1    | 5.10903E-06 | 0.00034534  |
| KMO      | 1.73931E-07 | 1.76446E-05 |
| KMT5A    | 3.41708E-06 | 0.00024467  |
| KNG2     | 0.000725008 | 0.0211582   |
| KNSTRN   | 0.000126668 | 0.00511123  |
| KRT80    | 1.88294E-13 | 6.60554E-11 |
| LACC1    | 1.92905E-08 | 2.5184E-06  |
| LAIR1    | 3.10862E-15 | 1.51323E-12 |
| LAMA2    | 2.90123E-12 | 8.13317E-10 |
| LAMA4    | 4.5614E-05  | 0.00220843  |
| LAPTM5   | 0           | 0           |
| LAT      | 0.000429001 | 0.0138718   |
| LCK      | 7.26333E-08 | 8.15923E-06 |
| LCLAT1   | 9.36483E-06 | 0.000577666 |
| LCN2     | 8.21565E-15 | 3.76571E-12 |
| LCP1     | 0           | 0           |
| LCP2     | 1.42109E-14 | 6.32887E-12 |
| LDHA     | 0.000862147 | 0.0243538   |
| LGALS12  | 0.00101186  | 0.0276019   |
| LGALS3BP | 0           | 0           |
| LGI1     | 1.7835E-08  | 2.35778E-06 |
| LILR4B   | 0           | 0           |
| LILRA5   | 1.41596E-05 | 0.00081499  |

|          |             |             |
|----------|-------------|-------------|
| LILRA6   | 0.002056    | 0.0485545   |
| LIMD2    | 1.05937E-12 | 3.30962E-10 |
| LMO7     | 5.51307E-06 | 0.000369076 |
| LONRF2   | 0.00161902  | 0.0402638   |
| LPCAT2   | 5.93998E-06 | 0.000395967 |
| LPCAT3   | 2.31801E-05 | 0.00123632  |
| LPXN     | 4.90116E-08 | 5.81793E-06 |
| LRG1     | 4.05162E-05 | 0.00200648  |
| LRMP     | 2.22045E-16 | 1.26757E-13 |
| LRP8     | 6.78513E-06 | 0.000443825 |
| LRRC17   | 1.77978E-05 | 0.000994315 |
| LRRC25   | 8.80003E-08 | 9.62714E-06 |
| LRRC39   | 3.98541E-05 | 0.00197525  |
| LRRC3B   | 0.00089348  | 0.025025    |
| LSAMP    | 1.54862E-05 | 0.000880847 |
| LST1     | 2.67993E-06 | 0.000196826 |
| LTB      | 1.10023E-05 | 0.00066177  |
| LTBP2    | 4.2622E-10  | 7.64699E-08 |
| LTBP4    | 2.14388E-10 | 4.1296E-08  |
| LTC4S    | 0.00199686  | 0.0475152   |
| LY86     | 4.80282E-13 | 1.6128E-10  |
| LYVE1    | 4.06143E-10 | 7.34978E-08 |
| LYZ1     | 1.90633E-06 | 0.000146521 |
| LYZ2     | 5.973E-13   | 1.99508E-10 |
| MAD2L1   | 0.00151022  | 0.0380996   |
| MADD     | 6.37282E-06 | 0.000419918 |
| MAF      | 1.09488E-11 | 2.6962E-09  |
| MAFB     | 0.00185939  | 0.0450116   |
| MALL     | 1.81316E-06 | 0.000140046 |
| MAMSTR   | 7.83499E-05 | 0.00343814  |
| MANF     | 0.00122858  | 0.0326349   |
| MAP3K6   | 0.000310656 | 0.0107017   |
| MAP3K7   | 0.000133872 | 0.00533747  |
| MAP4K1   | 1.20449E-05 | 0.000714221 |
| MAP7D2   | 4.10664E-08 | 5.01705E-06 |
| MAPK8IP3 | 0.000717914 | 0.021003    |
| MAPKAPK3 | 0.000448476 | 0.0143538   |
| MARCH1   | 0           | 0           |
| MARCKSL1 | 2.98597E-08 | 3.74259E-06 |
| MARCO    | 0.000641306 | 0.0191038   |
| MAST3    | 4.4287E-05  | 0.00215582  |
| MATN4    | 0.00123665  | 0.0327797   |
| MCCC2    | 0.00187612  | 0.0452776   |
| MDGA1    | 0.000189135 | 0.00711174  |
| MDM2     | 4.66161E-05 | 0.00224483  |
| MEDAG    | 0.000896991 | 0.025101    |
| MEFV     | 0.00027609  | 0.00971757  |

|         |             |             |
|---------|-------------|-------------|
| MEGF6   | 0.000128481 | 0.00515854  |
| MELK    | 0.000184568 | 0.00696094  |
| MERTK   | 1.40702E-06 | 0.000114005 |
| METAP1D | 0.00145125  | 0.0368952   |
| MFAP4   | 4.44089E-16 | 2.46784E-13 |
| MGAT5   | 7.92921E-13 | 2.55341E-10 |
| MGAT5B  | 3.32294E-05 | 0.00168822  |
| MILR1   | 7.26411E-10 | 1.26357E-07 |
| MKI67   | 3.20557E-11 | 7.03824E-09 |
| MLX     | 6.22403E-05 | 0.00284453  |
| MMP12   | 2.9754E-14  | 1.22921E-11 |
| MMP13   | 2.08435E-11 | 4.81202E-09 |
| MMP14   | 0.000861223 | 0.0243496   |
| MMP25   | 0.000578348 | 0.0175871   |
| MMP27   | 8.54797E-05 | 0.0036917   |
| MMRN2   | 2.62823E-05 | 0.00137305  |
| MN1     | 7.00168E-05 | 0.00313379  |
| MNDA    | 7.65725E-08 | 8.55581E-06 |
| MNDAL   | 6.73917E-06 | 0.000441739 |
| MOB4    | 0.00213454  | 0.049977    |
| MPEG1   | 0           | 0           |
| MPZ     | 6.77236E-14 | 2.54653E-11 |
| MRC1    | 0           | 0           |
| MRGPRG  | 3.07972E-10 | 5.75569E-08 |
| MS4A1   | 5.19115E-09 | 7.65207E-07 |
| MS4A4B  | 1.60337E-07 | 1.64516E-05 |
| MS4A4C  | 1.17615E-07 | 1.24034E-05 |
| MS4A6C  | 0           | 0           |
| MS4A6D  | 0           | 0           |
| MS4A8A  | 0.00022522  | 0.00824164  |
| MSR1    | 0           | 0           |
| MTG2    | 0.000335274 | 0.0113926   |
| MTHFR   | 0.00187614  | 0.0452776   |
| MTUS2   | 0           | 0           |
| MUM1L1  | 7.3696E-05  | 0.00326587  |
| MUP7    | 0.000161909 | 0.00625281  |
| MUSK    | 0.000821743 | 0.0234232   |
| MXD3    | 0.00153812  | 0.0386345   |
| MYBPC2  | 0.000843177 | 0.0239472   |
| MYCBP2  | 0.000402451 | 0.0131762   |
| MYD88   | 3.96132E-05 | 0.00196641  |
| MYLK2   | 1.34133E-11 | 3.23956E-09 |
| MYO18B  | 0.00191114  | 0.046016    |
| MYO1B   | 0.00127568  | 0.033476    |
| MYO1F   | 4.40314E-13 | 1.49457E-10 |
| MYRIP   | 4.76795E-05 | 0.00228552  |
| MZB1    | 0.00100684  | 0.0274888   |

|           |             |             |
|-----------|-------------|-------------|
| NAALAD2   | 0.000817316 | 0.0233394   |
| NABP1     | 0.00102386  | 0.027893    |
| NAIP2     | 6.20591E-06 | 0.000409941 |
| NAIP5     | 8.88568E-08 | 9.70394E-06 |
| NAPSA     | 1.64563E-08 | 2.18936E-06 |
| NBR1      | 0.00156868  | 0.0392765   |
| NCF1      | 0           | 0           |
| NCF2      | 5.65547E-08 | 6.58878E-06 |
| NCKAP1L   | 0           | 0           |
| NCOR2     | 4.67467E-06 | 0.000318725 |
| NCS1      | 0.000137911 | 0.00546725  |
| NDC80     | 0.00104512  | 0.028386    |
| NDUFA4L2  | 0.000712759 | 0.0209051   |
| NECTIN4   | 1.06246E-07 | 1.13658E-05 |
| NEK2      | 0.000521096 | 0.0162313   |
| NEK6      | 3.04581E-09 | 4.6993E-07  |
| NEURL3    | 1.84035E-11 | 4.31212E-09 |
| NFAM1     | 0           | 0           |
| NFATC4    | 0.000132924 | 0.00530301  |
| NFIC      | 5.10377E-05 | 0.00240971  |
| NFIX      | 0.000544359 | 0.0167893   |
| NFKBID    | 0.00021529  | 0.00792446  |
| NFKBIZ    | 0.000345906 | 0.0116718   |
| NGF       | 2.33569E-12 | 6.69724E-10 |
| NIPSNAP3B | 3.70506E-05 | 0.00185682  |
| NKG7      | 1.7277E-05  | 0.000969533 |
| NKX2-3    | 0.000431692 | 0.0139159   |
| NLRC3     | 5.235E-08   | 6.17917E-06 |
| NLRC4     | 6.63126E-05 | 0.00300007  |
| NLRP1B    | 2.76509E-08 | 3.49363E-06 |
| NLRP3     | 3.69517E-10 | 6.76496E-08 |
| NOS2      | 0.000349201 | 0.0117514   |
| NOS3      | 1.70168E-09 | 2.73292E-07 |
| NOTCH3    | 2.02378E-08 | 2.63112E-06 |
| NOXO1     | 0.000335672 | 0.0113986   |
| NPL       | 1.57047E-06 | 0.000124047 |
| NPPA      | 2.72788E-11 | 6.096E-09   |
| NPPB      | 0.000167294 | 0.00644096  |
| NPR1      | 4.27741E-05 | 0.0020919   |
| NPR3      | 4.51169E-08 | 5.45083E-06 |
| NPTX2     | 3.19051E-08 | 3.96729E-06 |
| NPY       | 6.08909E-05 | 0.00279     |
| NRG1      | 0.00213321  | 0.0499646   |
| NRXN2     | 0.000238138 | 0.00858926  |
| NTNG2     | 0.000728014 | 0.0212294   |
| NTPCR     | 1.49277E-06 | 0.000119412 |
| NTRK2     | 0.000227654 | 0.00829907  |

|         |              |             |
|---------|--------------|-------------|
| NUDCD2  | 0.000922883  | 0.0257002   |
| NUDT6   | 6.29718E-13  | 2.09223E-10 |
| NUF2    | 0.0017279    | 0.0423676   |
| NUSAP1  | 6.02791E-06  | 0.000400977 |
| NYAP1   | 0.000103889  | 0.00433756  |
| OAS1A   | 0            | 0           |
| OAS1G   | 4.77254E-11  | 1.02987E-08 |
| OAS3    | 7.92131E-10  | 1.3703E-07  |
| OASL1   | 1.28765E-10  | 2.59658E-08 |
| OASL2   | 5.72653E-12  | 1.47376E-09 |
| OCRL    | 7.47811E-05  | 0.00330463  |
| OGT     | 0.000128477  | 0.00515854  |
| OLFM2   | 0.000389574  | 0.0128214   |
| OLFML1  | 0.000105226  | 0.00438174  |
| OLFR224 | 1.02878E-10  | 2.13915E-08 |
| OLFR330 | 0.0009969691 | 0.0273025   |
| OLFR558 | 6.91006E-08  | 7.83774E-06 |
| OLR1    | 5.17659E-05  | 0.00243676  |
| OMD     | 1.19804E-06  | 9.88583E-05 |
| OPTC    | 4.77634E-08  | 5.70209E-06 |
| OSM     | 0.00017948   | 0.00681515  |
| P2RX1   | 0            | 0           |
| P2RX4   | 0.000408833  | 0.0133503   |
| P2RX7   | 0.00136266   | 0.035141    |
| P2RY10  | 2.51451E-05  | 0.00132688  |
| P2RY13  | 7.91054E-05  | 0.00346645  |
| P4HA3   | 0.00148731   | 0.03769     |
| PAIP1   | 0.000191966  | 0.00720533  |
| PAK3    | 0.000430864  | 0.0139034   |
| PALLD   | 0            | 0           |
| PALM    | 0.0016035    | 0.039973    |
| PAPPA   | 1.67338E-06  | 0.000131022 |
| PAPSS2  | 0.000246469  | 0.00883897  |
| PAQR6   | 1.02428E-09  | 1.73836E-07 |
| PARD3   | 0.000236081  | 0.00853959  |
| PARP14  | 0.00153699   | 0.0386215   |
| PARP8   | 0.00132721   | 0.0344816   |
| PARVG   | 3.8903E-06   | 0.000271585 |
| PAX1    | 7.55806E-08  | 8.47515E-06 |
| PBK     | 0.000628944  | 0.0188069   |
| PCDH7   | 4.74731E-13  | 1.60273E-10 |
| PCOLCE2 | 2.09837E-10  | 4.05438E-08 |
| PDCD6IP | 1.08136E-13  | 3.90252E-11 |
| PDE1C   | 1.09194E-05  | 0.000657415 |
| PDE3A   | 1.08076E-05  | 0.000653188 |
| PDE9A   | 1.291E-08    | 1.77005E-06 |
| PDGFB   | 6.53507E-05  | 0.00296082  |



|         |             |             |
|---------|-------------|-------------|
| PDGFRL  | 3.79591E-08 | 4.65556E-06 |
| PDLIM7  | 1.69678E-11 | 4.0056E-09  |
| PEX5L   | 0           | 0           |
| PF4     | 0.0010697   | 0.0288912   |
| PFKFB4  | 7.76934E-13 | 2.51482E-10 |
| PHF11B  | 0.000464312 | 0.0147777   |
| PHLDB1  | 1.50824E-06 | 0.000120343 |
| PIEZO2  | 2.16839E-09 | 3.42121E-07 |
| PIK3AP1 | 0           | 0           |
| PIK3CG  | 9.3226E-05  | 0.00397969  |
| PIK3R5  | 1.83322E-09 | 2.92918E-07 |
| PILRA   | 2.91594E-08 | 3.66947E-06 |
| PILRB1  | 1.67756E-06 | 0.000131186 |
| PILRB2  | 0.000724389 | 0.0211572   |
| PIP4K2A | 3.13818E-07 | 2.97228E-05 |
| PIRA1   | 0.000442939 | 0.01422     |
| PIRA2   | 1.56541E-13 | 5.55368E-11 |
| PITPNA  | 4.95767E-07 | 4.43471E-05 |
| PLA2G2D | 2.2736E-05  | 0.00121621  |
| PLA2G4F | 0.00011883  | 0.00484228  |
| PLA2G5  | 1.28463E-10 | 2.59658E-08 |
| PLAC8   | 3.55076E-06 | 0.0002528   |
| PLAU    | 0.000137788 | 0.00546584  |
| PLBD1   | 2.42122E-11 | 5.46908E-09 |
| PLCXD3  | 0.00122977  | 0.0326526   |
| PLD4    | 7.29417E-13 | 2.38561E-10 |
| PLEK2   | 9.53583E-06 | 0.000586486 |
| PLK1    | 0.000206179 | 0.00763386  |
| PLPPR3  | 0.000792582 | 0.0227573   |
| PLXDC1  | 9.45253E-05 | 0.00402422  |
| PLXNC1  | 0.00101031  | 0.0275716   |
| PMAIP1  | 1.62119E-05 | 0.00091549  |
| PNKD    | 0.000933018 | 0.0258785   |
| PNPT1   | 0.00208039  | 0.0490566   |
| PODXL   | 6.55738E-06 | 0.000430722 |
| PODXL2  | 4.61819E-07 | 4.16372E-05 |
| POLG    | 0.00015342  | 0.00595428  |
| POR     | 5.54471E-05 | 0.00257693  |
| POU2AF1 | 1.3585E-05  | 0.000788679 |
| PPARA   | 0.000513483 | 0.0160339   |
| PPFIA4  | 0.00179875  | 0.043797    |
| PPL     | 3.47459E-09 | 5.30869E-07 |
| PPM1H   | 0.00113164  | 0.0303032   |
| PPP1R1B | 2.68829E-12 | 7.60412E-10 |
| PPTC7   | 8.17242E-05 | 0.00356133  |
| PRDM1   | 0.000288521 | 0.0101159   |
| PRKCB   | 9.77567E-06 | 0.000599476 |

|           |             |             |
|-----------|-------------|-------------|
| PRND      | 4.33161E-05 | 0.00211511  |
| PROCR     | 5.18862E-05 | 0.0024406   |
| PROSER2   | 0.00212194  | 0.0497413   |
| PRPF38B   | 0.00136588  | 0.0351808   |
| PRRT4     | 1.38205E-05 | 0.000797365 |
| PRSS12    | 8.99313E-06 | 0.000557477 |
| PRSS23    | 1.48455E-05 | 0.000847233 |
| PRUNE2    | 2.02715E-05 | 0.00110499  |
| PSD4      | 4.98596E-05 | 0.00237233  |
| PSMB8     | 7.20098E-06 | 0.000465026 |
| PSRC1     | 1.85228E-07 | 1.86111E-05 |
| PSTPIP1   | 0.000180615 | 0.00684964  |
| PSTPIP2   | 3.1919E-05  | 0.00163417  |
| PTAFR     | 4.24018E-10 | 7.62928E-08 |
| PTGER3    | 0.000153414 | 0.00595428  |
| PTGFR     | 1.62359E-12 | 4.76417E-10 |
| PTHLH     | 0.000358189 | 0.0120024   |
| PTPN1     | 4.47525E-06 | 0.000307465 |
| PTPN18    | 4.11085E-05 | 0.00202305  |
| PTPN2     | 0.000870076 | 0.0245336   |
| PTPN6     | 0           | 0           |
| PTPN7     | 8.63754E-13 | 2.73936E-10 |
| PTPRC     | 0           | 0           |
| PTPRCAP   | 6.72885E-05 | 0.00302895  |
| PTPRE     | 1.06131E-09 | 1.78785E-07 |
| PTPRF     | 0.00175157  | 0.0428477   |
| PTPRO     | 1.54181E-11 | 3.69534E-09 |
| PTPRZ1    | 0.000345417 | 0.0116615   |
| PYDC3     | 9.44737E-07 | 7.99525E-05 |
| PYDC4     | 1.07351E-07 | 1.14644E-05 |
| PYHIN1    | 3.23075E-13 | 1.10861E-10 |
| RAB11FIP1 | 0.00120171  | 0.0320023   |
| RAB17     | 0.000242015 | 0.00870407  |
| RAB31     | 0.000180977 | 0.00684964  |
| RAB44     | 9.95109E-05 | 0.00418819  |
| RAB8B     | 3.05267E-06 | 0.000221099 |
| RAC2      | 1.52777E-08 | 2.04993E-06 |
| RACGAP1   | 4.34307E-09 | 6.52447E-07 |
| RADIL     | 0.00155342  | 0.0389564   |
| RALGPS2   | 2.26294E-05 | 0.0012135   |
| RARRES1   | 1.11592E-07 | 1.1877E-05  |
| RASAL2    | 5.2063E-05  | 0.00244525  |
| RASAL3    | 0.0003073   | 0.0106346   |
| RASGRF2   | 0.00160254  | 0.0399649   |
| RASGRP1   | 5.00898E-05 | 0.00237747  |
| RASGRP3   | 0.000636786 | 0.0190017   |
| RASGRP4   | 2.87984E-10 | 5.41436E-08 |

|         |              |             |
|---------|--------------|-------------|
| RASSF2  | 9.614949E-07 | 8.09344E-05 |
| RASSF4  | 7.6303E-09   | 1.09498E-06 |
| RASSF5  | 3.89111E-12  | 1.0532E-09  |
| RBL1    | 0.000848994  | 0.024076    |
| RBM47   | 2.68894E-05  | 0.00140242  |
| RBP4    | 6.06676E-05  | 0.00278278  |
| RCBTB2  | 0.000367402  | 0.0122458   |
| RCOR2   | 0.00208422   | 0.0491182   |
| RELT    | 1.87961E-12  | 5.48977E-10 |
| REPS2   | 3.7593E-06   | 0.000266139 |
| REST    | 1.35895E-05  | 0.000788679 |
| RGS10   | 1.31596E-06  | 0.000107599 |
| RGS14   | 1.03128E-07  | 1.10699E-05 |
| RGS16   | 0.000259351  | 0.00925337  |
| RGS17   | 0.000969758  | 0.0267087   |
| RGS19   | 0.000814725  | 0.0233095   |
| RGS2    | 6.19055E-10  | 1.08585E-07 |
| RGS3    | 6.02872E-05  | 0.00277095  |
| RHOH    | 6.42668E-05  | 0.00292649  |
| RINL    | 0.000311022  | 0.0107017   |
| RIPK3   | 1.23743E-05  | 0.000729621 |
| RNASE6  | 6.64936E-05  | 0.00300492  |
| RNASEL  | 3.38028E-07  | 3.16813E-05 |
| RND3    | 0.00051064   | 0.015961    |
| RNF149  | 0.000627195  | 0.0187636   |
| RNF152  | 1.12394E-07  | 1.19421E-05 |
| RNF19B  | 4.45572E-11  | 9.64818E-09 |
| RPH3AL  | 0.000289619  | 0.0101431   |
| RPS6KA1 | 3.75739E-10  | 6.85888E-08 |
| RRAGD   | 3.34887E-05  | 0.00170002  |
| RSAD2   | 1.35468E-08  | 1.8294E-06  |
| RTP4    | 7.19195E-05  | 0.00320297  |
| RUNX1   | 0            | 0           |
| RUNX3   | 2.62055E-06  | 0.000193597 |
| S100A10 | 0.00185396   | 0.0448975   |
| S100A4  | 0.000937502  | 0.0259684   |
| S100A8  | 0.000550378  | 0.0169085   |
| S100A9  | 3.08946E-07  | 2.94076E-05 |
| SAA3    | 1.35447E-14  | 6.119E-12   |
| SACS    | 0.000185319  | 0.00698089  |
| SALL2   | 0.000814785  | 0.0233095   |
| SAMHD1  | 0            | 0           |
| SAMSN1  | 1.74593E-07  | 1.76547E-05 |
| SASH3   | 1.08789E-09  | 1.82657E-07 |
| SBF1    | 0.00103337   | 0.0281155   |
| SBF2    | 0.000495681  | 0.0155837   |
| SBNO2   | 7.85065E-06  | 0.000497898 |

|           |             |             |
|-----------|-------------|-------------|
| SBSN      | 0.000402933 | 0.0131782   |
| SCARA5    | 3.53802E-05 | 0.00178737  |
| SCG2      | 2.22045E-16 | 1.26757E-13 |
| SCIMP     | 2.40958E-09 | 3.7733E-07  |
| SCIN      | 1.04485E-07 | 1.11965E-05 |
| SDF2L1    | 0.00201191  | 0.0477155   |
| SEC14L2   | 0.00123802  | 0.0327886   |
| SELENBP2  | 0.0011214   | 0.0300806   |
| SELL      | 2.15594E-07 | 2.12531E-05 |
| SELM      | 0.00123367  | 0.0327283   |
| SELPLG    | 0           | 0           |
| SEMA3E    | 4.58088E-08 | 5.50012E-06 |
| SEPT3     | 0.000234129 | 0.00849343  |
| SERPINA1B | 5.35182E-10 | 9.54738E-08 |
| SERPINA1D | 4.49635E-09 | 6.70662E-07 |
| SERPINA1E | 4.44089E-16 | 2.46784E-13 |
| SERPINA3F | 7.20903E-05 | 0.00320684  |
| SERPINA3N | 8.13475E-05 | 0.00354984  |
| SERPINB8  | 0.000803229 | 0.0229999   |
| SERPINI1  | 1.51834E-12 | 4.51868E-10 |
| SFMBT1    | 3.80627E-06 | 0.000268556 |
| SFRP2     | 3.9535E-12  | 1.06094E-09 |
| SFRP4     | 0.000580191 | 0.0176346   |
| SGCB      | 0.000558028 | 0.01711     |
| SGCE      | 0.000257097 | 0.00918104  |
| SH2D2A    | 3.27338E-05 | 0.00166844  |
| SH3BP2    | 2.00905E-07 | 2.0121E-05  |
| SH3D21    | 2.5528E-05  | 0.00134304  |
| SH3PXD2B  | 7.5198E-05  | 0.00331372  |
| SHCBP1    | 0.00127665  | 0.0334867   |
| SHISA2    | 1.46933E-05 | 0.000841078 |
| SHPRH     | 0.000328581 | 0.0112047   |
| SHROOM1   | 0.000383632 | 0.0126724   |
| SHTN1     | 0.000932855 | 0.0258785   |
| SIGLECE   | 2.44095E-06 | 0.000181826 |
| SIGLECG   | 3.58913E-05 | 0.00180593  |
| SLAMF7    | 8.00537E-12 | 2.00278E-09 |
| SLAMF8    | 2.97635E-06 | 0.000216319 |
| SLAMF9    | 3.08108E-05 | 0.00158587  |
| SLC14A1   | 7.23402E-05 | 0.00321259  |
| SLC16A11  | 1.49473E-06 | 0.000119417 |
| SLC16A4   | 0.000412794 | 0.0134587   |
| SLC25A13  | 0.00016888  | 0.00648613  |
| SLC25A22  | 3.12461E-07 | 2.96389E-05 |
| SLC25A45  | 7.82692E-05 | 0.003437    |
| SLC28A2   | 9.56672E-10 | 1.6369E-07  |
| SLC38A4   | 3.47102E-07 | 3.23387E-05 |

|            |             |             |
|------------|-------------|-------------|
| SLC39A14   | 6.45456E-09 | 9.33903E-07 |
| SLC43A2    | 1.87286E-08 | 2.45013E-06 |
| SLC43A3    | 2.02134E-06 | 0.000154229 |
| SLC4A10    | 0.000569275 | 0.0174039   |
| SLC52A3    | 0.000330555 | 0.0112444   |
| SLC7A8     | 1.14235E-07 | 1.20967E-05 |
| SLC9A9     | 0.000665528 | 0.0197447   |
| SLFN1      | 1.23381E-10 | 2.50735E-08 |
| SLFN2      | 5.62212E-10 | 9.94481E-08 |
| SLFN9      | 1.55721E-05 | 0.000884129 |
| SLIT3      | 0.00046857  | 0.0148831   |
| SLMAP      | 0.00210816  | 0.0495071   |
| SLMO2      | 0.000527327 | 0.0163604   |
| SLPI       | 2.62013E-14 | 1.08961E-11 |
| SMIM5      | 4.96601E-05 | 0.00236601  |
| SMOC2      | 1.30196E-07 | 1.35358E-05 |
| SMS        | 0.00162507  | 0.0403825   |
| SNCG       | 2.71141E-06 | 0.000198905 |
| SNX20      | 4.05381E-07 | 3.73254E-05 |
| SOCS2      | 7.54108E-05 | 0.00332077  |
| SOCS3      | 9.67025E-07 | 8.1291E-05  |
| SOCS6      | 9.24002E-05 | 0.00394712  |
| SOX10      | 1.78744E-06 | 0.0001384   |
| SOX8       | 0.000369702 | 0.0123159   |
| SP100      | 2.16898E-11 | 4.95276E-09 |
| SPC25      | 0.000110707 | 0.0045796   |
| SPI1       | 0           | 0           |
| SPN        | 1.72534E-06 | 0.000134396 |
| SPOCK2     | 4.83419E-05 | 0.00230846  |
| SPON1      | 2.67258E-06 | 0.000196516 |
| SPP1       | 1.9984E-15  | 1.00392E-12 |
| SPRY4      | 9.71312E-05 | 0.00411325  |
| SREBF1     | 0.000448172 | 0.0143538   |
| ST13       | 0.00105261  | 0.0285278   |
| ST6GALNAC2 | 0.000228346 | 0.00831121  |
| ST8SIA4    | 6.67018E-06 | 0.000437674 |
| STAC2      | 0.0004353   | 0.0140034   |
| STAP1      | 0.00154491  | 0.0387896   |
| STARD8     | 0.000235081 | 0.00850831  |
| STAT4      | 6.99167E-05 | 0.00313154  |
| STC2       | 1.18058E-07 | 1.24178E-05 |
| STK4       | 0.000111829 | 0.00462297  |
| STMN1      | 4.31119E-06 | 0.000297908 |
| STMN2      | 0           | 0           |
| STRADB     | 0.000359567 | 0.0120357   |
| STXBP2     | 3.10365E-05 | 0.00159357  |
| STXBP6     | 1.8006E-05  | 0.00100506  |

|           |             |             |
|-----------|-------------|-------------|
| SUSD1     | 0.00111617  | 0.0299531   |
| SUSD3     | 4.75429E-05 | 0.00228071  |
| SYNC      | 0.000597023 | 0.0180327   |
| SYT7      | 6.95014E-05 | 0.00311875  |
| SYTL2     | 6.95696E-08 | 7.8714E-06  |
| TANC1     | 0.000181074 | 0.00684964  |
| TBC1D1    | 4.21328E-08 | 5.12739E-06 |
| TBC1D14   | 1.68902E-07 | 1.71899E-05 |
| TBC1D4    | 0.0017015   | 0.0418182   |
| TBXAS1    | 4.20275E-09 | 6.3632E-07  |
| TCAP      | 2.37575E-06 | 0.000178452 |
| TCEAL3    | 9.03722E-14 | 3.33819E-11 |
| TCF23     | 8.51037E-05 | 0.00368558  |
| TEAD1     | 1.53821E-05 | 0.000875722 |
| TENM4     | 0.00210649  | 0.049499    |
| TGFBI     | 6.88329E-06 | 0.000449777 |
| TGM1      | 3.9241E-05  | 0.00195102  |
| THBS4     | 5.785E-05   | 0.00266522  |
| THEMIS2   | 7.12386E-12 | 1.8038E-09  |
| THSD4     | 0.000882015 | 0.0248035   |
| TIA1      | 9.16126E-08 | 9.95296E-06 |
| TICAM2    | 4.66727E-06 | 0.000318567 |
| TIE1      | 0.00100145  | 0.0273774   |
| TIFAB     | 3.43559E-11 | 7.49089E-09 |
| TIMD4     | 0.000267678 | 0.00948582  |
| TK1       | 1.3467E-07  | 1.39318E-05 |
| TLR1      | 5.24848E-07 | 4.66165E-05 |
| TLR13     | 2.75922E-10 | 5.21883E-08 |
| TLR7      | 2.12566E-08 | 2.75787E-06 |
| TLR9      | 8.40345E-10 | 1.44971E-07 |
| TM9SF3    | 0.000896857 | 0.025101    |
| TMCC1     | 8.25876E-05 | 0.00359396  |
| TMEM110   | 5.64333E-05 | 0.00260952  |
| TMEM132C  | 1.74496E-05 | 0.000977471 |
| TMEM132E  | 0.000549875 | 0.0169013   |
| TMEM176A  | 7.83075E-08 | 8.71865E-06 |
| TMEM255B  | 0.000136529 | 0.00542273  |
| TMEM38B   | 2.26901E-05 | 0.00121572  |
| TMEM52    | 8.85011E-05 | 0.00380125  |
| TMEM82    | 2.16422E-11 | 4.95276E-09 |
| TMEM9     | 8.90712E-06 | 0.000553785 |
| TNF       | 0.00132563  | 0.0344692   |
| TNFAIP8   | 0           | 0           |
| TNFAIP8L2 | 9.70744E-06 | 0.000596457 |
| TNFRSF11B | 2.00359E-05 | 0.00109595  |
| TNFRSF13B | 0.00134964  | 0.0349198   |
| TNFRSF18  | 0.00149373  | 0.037822    |

|          |             |             |
|----------|-------------|-------------|
| TNFRSF19 | 5.16893E-06 | 0.000348432 |
| TNFRSF1B | 9.27636E-07 | 7.8824E-05  |
| TNFRSF25 | 4.21926E-05 | 0.00206507  |
| TNFRSF9  | 0.000117431 | 0.0048014   |
| TNFSF11  | 0.000421459 | 0.0136773   |
| TNFSF8   | 4.94612E-06 | 0.000335775 |
| TNN      | 0.000528332 | 0.016373    |
| TNNT1    | 1.82193E-05 | 0.00101426  |
| TNS3     | 0.000129106 | 0.0051738   |
| TOM1L1   | 0.00013178  | 0.00526406  |
| TOP2A    | 9.52571E-14 | 3.49805E-11 |
| TOR3A    | 0.00125431  | 0.0330942   |
| TPM3     | 1.24135E-07 | 1.29917E-05 |
| TPSB2    | 0.000123381 | 0.00499689  |
| TRABD2B  | 0.00184922  | 0.0448257   |
| TRAF3IP3 | 2.89401E-07 | 2.77449E-05 |
| TREM1    | 8.54419E-05 | 0.0036917   |
| TREM2    | 0           | 0           |
| TRIB3    | 1.02836E-05 | 0.000623924 |
| TRIM14   | 0.000198269 | 0.00738452  |
| TRIM25   | 0.00075143  | 0.0217548   |
| TRIM30A  | 3.26552E-06 | 0.000236242 |
| TRIM30D  | 1.23324E-05 | 0.000727833 |
| TRNP1    | 0.000182855 | 0.0069046   |
| TRPM2    | 0.000161405 | 0.00623717  |
| TRPM3    | 1.52548E-06 | 0.000121564 |
| TRPV4    | 1.95293E-06 | 0.00014919  |
| TSPAN11  | 2.01299E-10 | 3.9135E-08  |
| TSPAN2   | 1.37168E-05 | 0.000793855 |
| TSPAN32  | 5.88285E-07 | 5.20301E-05 |
| TTC13    | 0.000502166 | 0.0157431   |
| TTC39B   | 3.19313E-05 | 0.00163417  |
| TUBB4A   | 0.00174331  | 0.0426788   |
| TYRO3    | 0.000841073 | 0.0238983   |
| TYROBP   | 2.07143E-11 | 4.79984E-09 |
| UBE2C    | 1.33855E-05 | 0.000780448 |
| UGT1A6A  | 0.000375319 | 0.0124597   |
| UGT1A7C  | 0.000375319 | 0.0124597   |
| UNC5C    | 2.2186E-05  | 0.00119176  |
| UNC93B1  | 0           | 0           |
| UPP1     | 0.000864804 | 0.0244179   |
| USF3     | 3.58184E-10 | 6.59595E-08 |
| USP18    | 0.000210901 | 0.00779032  |
| USP7     | 0.000118728 | 0.00484123  |
| UTRN     | 3.33006E-06 | 0.00024048  |
| UTS2R    | 0.00166763  | 0.0412115   |
| VAV1     | 0           | 0           |

|         |             |             |
|---------|-------------|-------------|
| VCL     | 0.000938108 | 0.0259738   |
| VIPR2   | 1.44329E-14 | 6.38249E-12 |
| VMP1    | 1.23304E-11 | 3.02455E-09 |
| VSIG4   | 1.54873E-09 | 2.50006E-07 |
| VSIR    | 1.67306E-06 | 0.000131022 |
| VWF     | 0           | 0           |
| WAS     | 3.00129E-09 | 4.64203E-07 |
| WDFY4   | 5.49697E-05 | 0.0025607   |
| WDR95   | 0.000241721 | 0.0086985   |
| WFDC17  | 2.54949E-10 | 4.8367E-08  |
| WFDC21  | 0.0003822   | 0.0126317   |
| WHRN    | 1.44483E-05 | 0.000829325 |
| WHSC1   | 0.000122563 | 0.00497179  |
| WISP1   | 0.000190903 | 0.00716969  |
| WNK4    | 0.000199964 | 0.00744135  |
| WNT16   | 0.000195773 | 0.00731325  |
| WNT2B   | 0.00187342  | 0.0452468   |
| WNT5A   | 0           | 0           |
| WNT9B   | 0.000115683 | 0.00475413  |
| WSB1    | 1.74557E-06 | 0.000135492 |
| XCR1    | 0.000666117 | 0.0197492   |
| XPNPEP2 | 9.97142E-05 | 0.00418996  |
| YPEL4   | 0.000236459 | 0.00854834  |
| ZBP1    | 1.18328E-12 | 3.64234E-10 |
| ZC3H12D | 9.47107E-06 | 0.000583647 |
| ZC3H7A  | 1.16391E-10 | 2.39631E-08 |
| ZFP367  | 0.000337322 | 0.0114374   |
| ZFP521  | 8.64418E-10 | 1.48715E-07 |
| ZFYVE16 | 0.000217175 | 0.00798448  |



**Log2(fold\_change)**

-1.03043  
-1.705441  
1.287068  
1.062359  
1.741346  
1.811201  
1.062741  
-2.195885  
0.857245  
0.8611273  
0.5610406  
1.584343  
0.5940632  
1.255191  
-1.091893  
-1.269224  
0.9232416  
1.592966  
1.315729  
-1.149668  
-1.488822  
-0.7006501  
-0.8493932  
-0.8001989  
0.6016304  
0.836792  
1.966171  
1.344065  
-2.393088  
-1.664175  
0.6062279  
-0.8879632  
0.5681292  
-2.083567  
1.007676  
1.173541  
-1.363901  
-1.24409  
1.056836  
-0.5745668  
-0.8837208  
-2.46802  
-0.6724104  
1.85454  
1.509077

-1.208918  
1.260151  
-1.55784  
-1.234132  
-2.419988  
0.8540351  
-1.83334  
-1.592101  
-1.649281  
1.83904  
-1.537352  
-1.449938  
0.5150476  
1.52297  
1.085029  
-0.7952225  
-0.986563  
1.448426  
-1.502606  
-1.704133  
0.4770555  
-0.7041645  
1.562089  
-1.435831  
0.4947116  
-1.748282  
-1.167401  
1.984901  
-0.7940979  
-1.697205  
-0.9470035  
-1.248734  
-1.219881  
-2.153841  
1.445046  
1.15437  
0.9933629  
1.776873  
2.133878  
0.3794588  
0.7930315  
1.336385  
-1.245428  
-0.7089298  
1.218066  
0.6454049  
1.205988

-1.878983  
-1.615181  
-1.899081  
-1.05448  
2.010263  
0.9603815  
-0.6358243  
1.56713  
-1.811037  
-1.232358  
1.303192  
1.907  
0.5227305  
0.8170277  
1.21229  
0.9448491  
-1.535385  
0.629618  
1.36489  
1.291812  
1.294515  
-1.891642  
-1.997189  
1.824318  
1.170426  
1.301309  
0.9305258  
1.19605  
-2.160213  
-0.7977442  
0.7767197  
-1.315249  
0.4957806  
0.9874276  
1.254772  
-0.8499408  
-0.4233817  
1.763902  
-3.343138  
-1.049197  
-0.7486134  
-1.52418  
-0.9794805  
-1.309957  
0.6831346  
-0.847522  
-0.9456638

-1.195454  
-1.259117  
-1.002844  
-1.809219  
1.637014  
1.261962  
1.152746  
1.261461  
-1.694756  
1.579303  
-3.031866  
-2.681974  
-0.6144452  
0.395827  
-1.507839  
0.5831846  
0.514047  
0.9384415  
-1.945105  
1.257612  
-2.0917  
0.7320081  
-1.288577  
1.083074  
0.8861575  
1.511123  
1.37257  
0.8598843  
-1.757383  
0.891866  
-0.5334235  
-0.4243789  
-1.581669  
-1.240124  
0.5255327  
-1.831426  
-0.6668841  
-1.965514  
1.488228  
1.273339  
2.032689  
1.480511  
0.9173849  
0.7762988  
1.035364  
0.7126051  
-0.9965836

-0.5849995  
0.3966052  
0.4822853  
-1.994002  
1.77079  
0.8657147  
-1.191078  
-1.234826  
-1.038668  
1.093147  
1.195728  
0.6804082  
-1.191521  
-2.641829  
-0.8926015  
0.9406595  
-0.6166597  
-0.5182607  
-1.097094  
-1.343497  
1.226215  
1.974497  
1.458987  
3.813192  
1.446212  
2.059867  
1.245219  
1.364281  
-1.496434  
1.999193  
-2.345151  
1.003902  
0.7087322  
-1.477175  
-1.238201  
-1.655171  
-0.9083498  
-1.321152  
1.348553  
0.9388549  
-1.051174  
-0.5329321  
-1.109976  
0.6639038  
-1.089506  
1.055751  
0.737445

1.617566  
1.005764  
-0.7092482  
-0.5775289  
-0.4535584  
0.5937907  
-1.835035  
1.080351  
-1.378458  
1.509416  
-0.6501172  
-1.273323  
0.9743697  
0.7863837  
-1.943507  
-1.681504  
2.4527  
-1.256031  
-1.032347  
0.8463539  
-2.665103  
-3.299441  
0.9818071  
0.4248869  
-1.209167  
-0.9098659  
1.016236  
-1.62796  
1.123213  
-1.779317  
-1.483783  
1.368133  
-0.7577596  
-1.750425  
0.6125871  
0.8621197  
-0.8670678  
1.039515  
1.606323  
0.5512456  
0.8196103  
-1.238429  
1.568148  
0.6928971  
1.446422  
1.190672  
-1.160135

1.377451  
-0.550225  
0.7470623  
-1.003597  
-0.6464535  
-0.8361316  
-1.7765  
-0.5533772  
-1.951888  
-1.932957  
-1.628128  
1.304602  
1.097534  
-0.4944782  
1.095928  
-0.4164487  
-0.6512014  
-0.8044438  
2.204105  
-1.381836  
-1.827442  
-1.688119  
1.235205  
-0.9837189  
-0.9473195  
-2.35425  
-1.467066  
1.199518  
1.082313  
-0.9422719  
1.175258  
-1.377673  
0.7088338  
-1.126247  
-1.531419  
-1.616354  
-1.326193  
-1.157096  
-1.455301  
-1.072699  
1.140105  
0.9103994  
0.7192451  
-1.196291  
-0.937409  
0.9562298  
-1.347452

1.419585  
-1.560546  
1.058226  
2.19531  
-0.6983747  
-0.6216388  
2.532528  
0.4050026  
-1.679987  
-1.196821  
1.533434  
-1.094246  
1.461169  
1.436831  
1.41875  
-1.854814  
1.887583  
0.7870312  
-1.318799  
1.177883  
1.602025  
1.187887  
2.604584  
1.401881  
1.810245  
-1.183033  
-1.445529  
-0.8844121  
-1.606407  
0.8114842  
1.803641  
0.5748394  
1.314817  
-1.696648  
1.817616  
1.540231  
-1.260321  
-0.5344816  
1.646391  
-1.783241  
1.316573  
1.60346  
1.537799  
1.909819  
0.7600396  
1.131236  
1.21396



-2.907239  
-1.642722  
-1.31701  
0.5333874  
0.9646749  
0.7855828  
-0.4184979  
-1.931544  
1.593906  
-2.61093  
4.059979  
0.8818987  
-0.7045022  
2.12489  
3.756798  
1.87654  
1.973182  
1.890635  
2.536002  
-0.5820521  
2.43151  
0.895636  
1.187066  
1.322936  
1.374109  
1.23805  
2.246134  
1.735478  
-1.053032  
1.479197  
1.852264  
1.480778  
-1.356601  
0.701875  
1.341878  
-1.335155  
1.142316  
2.76823  
-1.392748  
1.256883  
-1.736377  
1.465749  
2.194221  
-1.377288  
1.700772  
2.791497  
2.143011

1.808102  
2.731004  
0.3961558  
1.768565  
-1.82597  
2.027706  
0.7447135  
2.033199  
1.306232  
2.534581  
1.542117  
2.154114  
2.019729  
2.333669  
1.396341  
1.921162  
3.501332  
2.902012  
2.017498  
1.589066  
1.086176  
1.464431  
1.93077  
-1.296709  
-1.250658  
1.163368  
1.30517  
1.447024  
-1.498767  
1.487904  
1.185908  
1.718392  
-0.638652  
0.8260253  
1.364044  
-2.126432  
1.117441  
-0.7615871  
1.79697  
-0.603901  
1.512871  
1.002869  
-1.388947  
0.4568194  
-1.349037  
1.144302  
2.350247

0.6004784  
2.538583  
1.487374  
0.5616431  
-0.4954922  
1.217022  
1.563898  
-1.158164  
1.732306  
-0.5482234  
-1.188599  
1.131358  
-0.5453364  
-1.785148  
-1.704697  
1.425211  
2.179574  
2.039074  
1.633991  
1.570539  
1.747206  
1.439167  
1.474417  
1.085606  
0.7461993  
0.780463  
1.068318  
1.970113  
-1.264296  
2.340405  
3.084051  
1.290075  
-0.3866462  
1.346235  
-1.309804  
1.982376  
1.354516  
-1.664666  
1.692198  
2.038457  
1.203024  
1.203984  
0.7213848  
-1.22703  
-0.7966169  
1.483294  
1.593113

1.365316  
3.204151  
0.9816924  
1.836148  
1.192201  
1.678787  
1.020189  
1.834103  
-1.247562  
2.167602  
1.355338  
1.192207  
1.309756  
1.805055  
0.6837274  
1.984182  
2.483806  
4.227857  
3.304027  
5.059129  
1.648037  
1.717555  
1.561368  
1.595732  
-2.172458  
-1.573132  
1.158581  
1.033147  
1.322725  
1.600137  
0.9491957  
0.798086  
-0.7325053  
-1.854303  
0.6440775  
-0.9973013  
1.211081  
2.381196  
0.6655503  
0.8342259  
2.144898  
-1.638648  
0.8655487  
-0.8699203  
1.844471  
1.26823  
1.623305

1.86358  
1.893685  
0.8292466  
0.8698865  
1.214079  
0.6810673  
1.026429  
-0.7547404  
1.281787  
1.500774  
1.402373  
-1.093547  
1.626274  
2.661872  
1.603135  
3.37194  
2.280302  
0.5664414  
-1.025744  
-3.319892  
1.71464  
1.322538  
1.387403  
-1.119823  
-1.020649  
1.853031  
1.879109  
-0.4488347  
-0.5249942  
-1.002223  
2.316962  
0.4451033  
2.22483  
1.845244  
1.452726  
1.28207  
-1.3463  
-1.51253  
3.032977  
-0.8027256  
1.516936  
0.7086791  
2.104399  
2.444746  
1.456707  
1.488649  
0.916859

1.111471  
1.027825  
-1.328571  
3.129515  
-1.766786  
1.360632  
1.180213  
0.4047123  
1.157315  
-1.344107  
1.469814  
-0.4018239  
-1.473655  
-1.096751  
-0.8705709  
-1.136277  
1.034222  
-0.9641399  
1.864663  
1.954653  
-1.659423  
-1.971663  
2.085769  
1.486923  
-0.8847801  
-1.414099  
0.7303137  
-1.595393  
0.8332551  
0.5269666  
1.543227  
0.6559014  
-0.7857099  
-1.56054  
1.126546  
1.534831  
-1.503776  
2.276295  
1.853778  
1.27714  
2.865806  
0.5904605  
1.80892  
1.16011  
0.9537868  
1.31718  
1.559196

0.9425287  
-0.4939759  
0.4992592  
-1.499211  
1.033177  
1.94781  
1.569096  
2.683546  
1.270582  
1.35366  
1.404578  
0.6155251  
1.703273  
1.473094  
2.851297  
5.038419  
1.360485  
1.488773  
-1.271198  
-1.654142  
0.8597192  
1.01959  
1.653378  
-0.4156202  
0.6609043  
-1.195114  
-0.99914  
1.933487  
1.183025  
-1.085702  
1.946211  
-1.626431  
-0.7476141  
2.106533  
-1.169769  
-1.450312  
1.465535  
1.387712  
1.712863  
0.8747568  
0.9429065  
1.394606  
1.64988  
0.3797402  
2.790806  
1.907094  
1.848529

-1.154973  
3.407547  
1.613806  
1.360934  
1.489826  
0.4027045  
1.644458  
1.381789  
1.584312  
1.5508  
-1.967388  
1.278271  
0.8744533  
1.577435  
-0.7252373  
1.087084  
1.880275  
1.384566  
0.964146  
2.191577  
-0.4104709  
-1.626027  
-1.659225  
-2.226666  
1.377903  
1.62321  
1.399923  
0.9733428  
1.272919  
-1.981265  
-1.346853  
3.127569  
-1.478502  
-0.7697592  
-0.8566152  
1.565978  
-1.26852  
0.4328268  
1.616364  
1.688525  
1.513599  
-1.835607  
-0.6522369  
1.092711  
2.121192  
1.426497  
-3.05



2.316906  
-2.349875  
1.314463  
-1.602005  
2.264428  
-0.8236746  
1.634141  
1.096947  
1.0351  
-1.123125  
0.6861587  
1.750693  
-1.576752  
-1.447143  
1.030059  
0.5784526  
1.693426  
0.6079339  
-2.022256  
1.822034  
2.302736  
-1.501606  
1.801053  
1.181891  
1.063555  
-0.5081163  
0.9148936  
0.6968982  
2.275215  
1.635828  
-0.586753  
-1.013567  
1.085074  
0.8973342  
1.26151  
1.960725  
-0.624461  
1.031752  
0.9714804  
-0.9162009  
1.258343  
-0.8797376  
2.243612  
0.6763695  
-1.014319  
3.461889  
0.7212074

-1.367342  
-2.8666  
0.890949  
1.341102  
1.125792  
-1.517419  
-1.396976  
0.6812922  
-1.71181  
2.10593  
1.019673  
-1.509749  
1.345018  
2.286512  
2.611402  
-2.240847  
-0.9079534  
0.6792021  
1.097305  
1.884146  
-1.452729  
-1.11263  
-3.234482  
1.27601  
2.62554  
2.445414  
1.261139  
1.772018  
-1.575777  
0.9208151  
-3.52999  
1.323706  
-1.004099  
-0.6205274  
1.633297  
1.199863  
0.4705937  
2.729452  
1.585937  
1.486461  
1.665066  
1.387529  
2.774597  
1.347334  
1.352423  
2.167648  
2.591761

0.5227166  
1.811766  
1.318845  
2.128884  
1.546482  
1.260176  
-1.558164  
0.7191005  
-1.990467  
2.377841  
-3.187546  
-1.448532  
2.216604  
0.8745971  
1.046037  
-1.457235  
1.591834  
1.845203  
-1.324179  
1.888338  
1.640607  
-1.405764  
0.9931679  
1.189683  
1.414545  
1.716313  
-0.7264238  
1.18613  
0.9321663  
2.452998  
1.259471  
-1.926435  
1.340908  
1.335588  
0.9701473  
0.62135  
2.205341  
0.5065764  
-1.006089  
-1.283682  
1.1681  
-1.087566  
2.286001  
0.9656399  
2.180906  
2.425377  
2.463682

-0.6718502  
-1.411405  
1.451785  
2.44347  
0.9303724  
2.436701  
-3.606154  
-2.621354  
-1.784502  
-1.222463  
1.377682  
-0.8045173  
0.6410764  
-1.118349  
0.9191425  
0.6610958  
0.9362012  
1.323983  
1.04577  
2.234357  
-1.562474  
3.109727  
2.649981  
1.017379  
2.157079  
2.45029  
3.070088  
3.681428  
3.785451  
2.395556  
-1.324838  
1.315702  
1.467544  
1.128169  
2.161502  
2.753829  
1.509727  
2.050752  
1.733075  
1.621396  
1.269405  
0.8680366  
1.702953  
1.627231  
1.31403  
2.266976  
2.441161

1.728845  
2.460522  
2.461112  
2.346987  
4.264787  
2.500927  
1.097897  
1.584887  
1.772516  
1.824783  
1.132433  
0.9517664  
2.689721  
1.303078  
2.572181  
2.587543  
1.749462  
1.427223  
1.830386  
1.480898  
2.070848  
2.477177  
2.361597  
1.578866  
1.018913  
2.207886  
2.036233  
0.7928151  
1.290684  
1.699585  
2.26334  
0.963146  
1.056061  
-1.380937  
-0.9525788  
0.4922223  
3.386384  
0.8306583  
1.170535  
0.718313  
2.141917  
1.178582  
1.498642  
2.017303  
1.635716  
2.049895  
-3.811076

1.814719  
1.150498  
-1.16336  
1.07716  
1.899843  
-1.682345  
1.499913  
0.4805516  
3.050532  
-0.9961229  
2.0039  
-2.953117  
-1.840629  
2.618908  
2.85102  
2.574778  
1.275363  
2.590725  
2.484657  
1.439676  
-2.511474  
-1.261665  
0.8139788  
1.318344  
-1.992419  
0.89167  
1.833015  
-2.230529  
1.468129  
2.473844  
1.981114  
-1.170444  
1.756916  
1.529723  
-0.6660756  
3.133173  
0.7683591  
-1.21958  
1.602402  
2.176084  
1.693579  
0.6987285  
2.287576  
0.7642797  
3.428024  
1.104725  
2.829692

1.316889  
1.668589  
3.439444  
2.131843  
2.172153  
1.321681  
2.153155  
1.674856  
1.338994  
1.267833  
1.480769  
0.7511387  
0.843598  
2.877645  
1.080912  
-0.8001159  
2.010291  
0.5494096  
2.52826  
2.512922  
-2.604305  
-2.239108  
0.9560582  
0.9745467  
0.52574  
1.408731  
1.147346  
-0.4763308  
0.7461812  
1.747732  
1.396702  
1.658501  
-2.085652  
1.109991  
-1.627324  
1.738304  
1.692384  
-1.232432  
1.360064  
0.8664861  
-1.267942  
-1.193195  
0.8018669  
1.101821  
2.255702  
1.190047  
1.57344

2.381856  
1.592598  
0.7131768  
1.350324  
0.8235584  
-0.4699826  
1.057595  
0.4191641  
2.29876  
0.5012198  
1.24185  
1.223342  
1.563313  
-0.8863153  
2.064044  
-1.319976  
0.5197678  
0.8039769  
1.084366  
0.7849856  
0.9829836  
0.8570964  
1.040922  
1.255424  
-2.313191  
-1.112188  
3.280967  
0.7771981  
1.551096  
0.5236967  
1.970202  
-0.9513122  
0.8626947  
2.607589  
0.8067665  
1.362948  
2.467845  
-1.535046  
0.7384172  
0.4160165  
-1.720605  
3.030991  
-3.037495  
0.9045613  
-1.718104  
-1.624026  
1.369601



1.870219  
1.873088  
1.628902  
0.7536629  
-2.018322  
-1.186313  
1.190335  
-1.291407  
2.301773  
3.134887  
2.592979  
3.005295  
2.598414  
2.975752  
1.472529  
1.356099  
1.650789  
2.284987  
1.82841  
1.533006  
-1.252387  
2.758596  
2.451398  
1.492265  
-1.647364  
2.239906  
-1.180238  
-0.7792996  
-0.8427905  
-0.6214149  
-1.105574  
2.410156  
1.116159  
-1.620407  
1.184094  
-0.5736114  
1.012642  
1.022262  
0.6728785  
1.843244  
1.002089  
0.5273677  
0.5705592  
1.741093  
-0.8159146  
-1.618529  
-1.182044

2.796963  
-1.536064  
3.587513  
0.9995309  
1.176143  
1.556201  
1.38533  
1.212006  
-2.190366  
0.9663805  
-1.96169  
-1.069348  
1.420348  
1.735752  
-0.8765514  
1.42841  
-0.6781349  
1.475443  
2.210818  
1.784915  
-0.9903941  
1.220628  
1.238424  
2.054191  
1.436972  
1.647115  
1.907963  
0.8235264  
1.669294  
0.6353456  
-0.7136965  
2.262777  
2.226471  
1.861206  
1.120463  
2.648763  
1.357359  
2.623217  
1.830198  
2.686427  
-0.5713971  
-1.139487  
-1.633825  
-1.034706  
1.437142  
-1.338449  
0.9822957

2.061788  
2.173259  
1.598527  
1.290248  
1.520853  
2.026394  
1.316849  
1.783781  
2.163473  
1.600018  
1.117885  
2.710764  
1.828337  
1.752596  
-0.5556892  
1.576972  
2.016799  
-2.992504  
1.1251  
1.917007  
-1.109091  
-2.044781  
0.7679425  
0.654259  
0.9775708  
1.413815  
1.212835  
0.5022879  
-1.431598  
-1.611837  
2.24214  
2.293047  
-1.037829  
2.081033  
-1.156223  
1.038637  
-0.8682411  
0.9199958  
-1.172115  
-1.604362  
1.945636  
-1.731614  
0.525647  
-0.6053897  
1.901292  
1.683765  
1.144255

0.9815725  
1.44177  
1.539851  
2.022182  
2.672792  
0.4170319  
-0.8479552  
-1.384399  
2.061062  
1.999866  
3.180736  
-0.7025263  
1.875139  
2.341402  
3.385859  
3.495586  
1.656965  
3.399665  
-0.970308  
2.219794  
1.455432  
-0.7575753  
1.454344  
3.568603  
1.147935  
1.843696  
1.137228  
1.455865  
-2.129268  
0.4312328  
2.121463  
0.6916471  
2.317067  
0.9923436  
1.252807  
2.584481  
1.929366  
0.3947165  
0.7735328  
1.931345  
2.799239  
-1.514824  
2.175764  
1.785935  
-1.309896  
0.978212  
-1.240364

4.323707  
0.9260972  
1.60359  
1.134271  
-1.639101  
2.614069  
-1.899443  
-1.54186  
-1.67288  
-0.8102279  
0.9092448  
1.43302  
0.5774352  
1.797667  
1.369792  
1.5721  
2.362031  
1.61643  
0.8630421  
-3.854537  
-3.202547  
-2.577742  
2.761442  
2.322825  
2.131156  
1.465995  
0.4601548  
1.703087  
1.537356  
-1.493841  
2.166662  
3.052114  
-1.08516  
-1.012213  
2.838427  
1.971644  
2.62792  
1.240151  
3.350057  
3.178881  
2.548326  
0.6786  
0.9901151  
1.394916  
-1.302899  
2.630388  
2.062546

1.411966  
1.37449  
0.9608651  
-0.5780976  
1.775784  
0.6816998  
2.660069  
1.482171  
2.13483  
2.351048  
-1.550956  
2.120913  
1.477615  
-1.22994  
-2.027908  
2.331486  
1.881687  
0.8920826  
-1.359444  
1.305101  
2.938622  
2.040023  
1.724373  
2.697042  
0.7210073  
1.203444  
1.501522  
0.9963025  
-1.84176  
-1.172347  
0.6131942  
-0.684846  
0.7099957  
2.236617  
1.472605  
0.4320714  
1.066063  
2.954581  
2.042457  
1.024598  
0.5205616  
-0.8289613  
0.4671146  
-0.9147107  
0.7056724  
-1.133509  
2.528297

-0.8706481  
1.249086  
1.149462  
-0.5661507  
-2.589468  
0.9825073  
1.145252  
2.436852  
2.194093  
0.5496413  
1.985334  
2.329449  
1.187407  
1.254464  
-1.514743  
-1.410037  
-1.250184  
2.109989  
1.752374  
0.5826802  
3.136331  
2.199284  
2.862065  
-2.262633  
0.9698731  
1.963721  
5.004979  
3.642395  
2.728202  
1.410724  
3.11928  
-0.4198966  
0.542492  
1.184224  
1.078709  
-2.153448  
-1.388536  
1.325049  
-0.6140836  
0.5843886  
1.034161  
-3.13377  
-1.059468  
1.581883  
2.394979  
-1.810628  
1.970267

-0.5800825  
1.392662  
1.261  
1.848488  
2.226148  
0.4120048  
2.841899  
2.001043  
2.50013  
-0.4788985  
1.286481  
0.8156274  
-1.333852  
1.458747  
1.139166  
1.361299  
2.755161  
2.566127  
-0.5579952  
-0.563939  
-0.867826  
2.032983  
1.121607  
1.452861  
0.932906  
1.730214  
-1.306217  
2.582833  
1.661488  
2.787583  
2.453848  
1.491933  
-1.861262  
1.901194  
-1.272192  
1.823761  
2.887155  
2.881096  
-0.6400445  
1.494942  
1.948259  
-2.121601  
2.001905  
-1.609371  
-0.5870174  
0.8325001  
-1.154897



0.5420119  
1.052438  
1.34817  
1.509633  
-0.4278128  
2.602133  
2.534625  
1.645172  
2.777247  
1.355977  
0.4811154  
0.652098  
1.824547  
-1.440074  
-1.718461  
-1.086455  
1.939101  
2.509093  
-2.111213  
-1.369047  
0.8976007  
1.879483  
0.6050731  
0.7023267  
1.736655  
1.17347  
1.22321  
0.4781406  
1.778316  
1.3166  
-0.9610202  
1.023474  
-1.305626  
-1.439181  
-0.8167906  
1.030113  
0.4252524  
2.343462  
-2.251658  
2.031152  
0.9608035  
-1.522186  
0.682183  
1.119844  
1.226825  
-1.862723  
1.376438

-1.965388  
-0.4284574  
-1.881465  
1.180801  
1.560563  
1.637365  
-0.412226  
0.9137854  
2.703682  
2.144578  
2.132771  
2.012276  
2.556928  
2.152838  
1.422707  
2.023925  
2.414937  
0.6849968  
1.354697  
-1.938051  
-2.853294  
2.160187  
1.368069  
2.366755  
-1.257295  
2.590686  
-2.049861  
1.226226  
1.149376  
-1.2776  
1.009879  
1.153453  
-0.4176238  
0.8867507  
-1.430688  
-0.8372753  
0.589705  
-0.5214068  
1.012646  
1.74609  
1.162185  
-1.960432  
1.114134  
-2.704483  
0.5189664  
1.446282  
2.309958

1.561266  
-0.7739723  
-1.05394  
0.5224824  
-1.800802  
-1.656523  
1.576471  
1.292213  
2.676846  
0.796988  
1.329193  
0.9527645  
1.51656  
1.938468  
1.210573  
-2.952673  
-1.494331  
1.101525  
1.783332  
0.8575658  
2.79491  
2.011258  
3.296841  
1.732893  
1.815564  
0.7215224  
2.507039  
0.8525534  
1.69972  
3.070348  
2.171061  
0.7646037  
-2.273677  
1.204956  
2.070016  
0.5691002  
1.876494  
2.050339  
-0.9033688  
1.325405  
2.040273  
1.252023  
2.07459  
-0.9494756  
0.7956354  
1.087793  
2.204567

1.32595  
1.784497  
1.67644  
1.072696  
1.628819  
-1.343405  
0.3884865  
-1.457645  
3.181726  
0.9072086  
0.5008264  
1.111563  
2.320012  
1.133201  
1.33143  
0.6351208  
1.430573  
0.4543116  
1.399004  
1.656311  
1.58099  
2.285703  
1.702152  
1.111643  
1.238233  
1.373613  
1.053231  
-1.648477  
1.908183  
-0.7385663  
2.029361  
1.569919  
1.41659  
2.121569  
-0.7641269  
0.5811553  
2.013758  
1.81345  
5.657627  
1.215486  
-0.3846803  
1.091965  
1.715757  
2.390989  
0.5634978  
0.6389794  
1.28107

1.441261  
-1.563439  
2.888635  
2.301167  
-1.543324  
1.161633  
-1.069882  
-0.7003322  
2.670129  
-1.066374  
2.722656  
0.66198  
1.657994  
-2.416794  
-3.087822  
-2.333557  
1.412926  
1.478071  
1.186332  
1.823378  
0.6902466  
-1.661072  
-1.18388  
0.6135476  
-0.5447256  
1.366559  
1.35542  
-0.9589996  
1.273159  
0.7146498  
-1.444498  
0.7336889  
-1.343889  
0.7805454  
2.258332  
2.250851  
3.139448  
1.936377  
1.592124  
1.200929  
-1.686179  
1.214404  
1.216321  
0.8742889  
0.963704  
2.57261  
-2.473272

1.123187  
1.968509  
-1.089332  
-2.084145  
-0.9375027  
2.029216  
1.093542  
2.476921  
2.387239  
1.177354  
1.410733  
0.4862789  
0.6241859  
2.976802  
-1.035821  
-1.217491  
0.8419707  
1.578618  
2.489936  
-0.83329  
1.733803  
0.497408  
-0.5391618  
-1.11426  
0.7177905  
1.557246  
2.543412  
1.895237  
-1.358383  
-1.493677  
2.770526  
1.210492  
0.3815713  
0.464655  
-1.07786  
1.62557  
1.293424  
1.879738  
1.10314  
1.210864  
-1.556281  
0.8427759  
1.140583  
-1.725075  
0.7171196  
1.273217  
-1.026583

1.93836  
1.925223  
0.7985706  
-1.573389  
1.645321  
0.6575256  
0.8934239  
0.6320066  
0.4664705  
2.341478  
-1.940286  
-1.074837  
-1.412279  
0.8614115  
1.100964  
-1.715689  
1.656775  
-1.449201  
2.529025  
0.9653637  
0.7476896  
1.3343  
-0.9669526  
2.27412  
1.665547  
1.271901  
2.555573  
1.807567  
2.919337  
1.676588  
0.4546508  
0.7344565  
-0.7246932  
-0.6262645  
-1.401621  
1.41558  
-1.431645  
0.989202  
-2.749316  
-1.261562  
-0.4423816  
1.12004  
0.9117754  
1.939681  
1.383362  
1.968749  
1.041735

-0.9948472  
1.48145  
1.377884  
2.735609  
0.9933321  
1.509991  
1.217391  
-1.489581  
1.222438  
-0.8130435  
2.311749  
0.4727961  
0.9720885  
1.207507  
1.046416  
1.577634  
2.614167  
2.812064  
-1.02232  
1.595439  
0.8676373  
1.41135  
1.287156  
0.8174523  
1.574019  
-1.356676  
-0.7447074  
-1.686417  
1.176988  
1.880611  
0.5983196  
1.309928  
-1.1114  
-0.532173  
2.472734  
1.908799  
1.717492  
1.717492  
1.328062  
2.065658  
1.534002  
0.6552075  
1.433198  
0.4213666  
0.5295815  
-0.907809  
2.740355



1.187642  
-3.804443  
0.8149399  
2.304997  
0.6841682  
-1.168193  
2.053766  
2.466669  
-1.412745  
2.755913  
1.951335  
-0.7415869  
0.8342562  
1.155895  
-1.457173  
1.108359  
-1.115126  
-1.555694  
-1.20872  
0.6442125  
0.5214901  
-2.162919  
-0.7090893  
2.299056  
1.447439  
1.000259  
0.8900833  
-1.008566  
0.6675017

**Supplemental Table II Predicted regulatory PKS in the aortas of MFS mice and MFS**

| <b>Input list Rank</b> | <b>Protein Kinase</b> | <b>Hypergeometric</b> | <b> Z-score</b> | <b>Combine</b> | <b>Enriched Substrate</b> |
|------------------------|-----------------------|-----------------------|-----------------|----------------|---------------------------|
| MFS mice 1             | HIPK2                 | 1.91E-20              | 0               | 0              | title=Overlapping E       |
| MFS mice 2             | CSNK2A1               | 6.93E-19              | 0               | 0              | title=Overlapping E       |
| MFS mice 3             | CDK1                  | 1.80E-18              | 0               | 0              | title=Overlapping E       |
| MFS mice 4             | MAPK14                | 1.89E-18              | 0               | 0              | title=Overlapping E       |
| MFS mice 5             | CDK4                  | 4.79E-17              | 0               | 0              | title=Overlapping E       |
| MFS mice 6             | GSK3B                 | 7.75E-15              | 0               | 0              | title=Overlapping E       |
| MFS mice 7             | AKT1                  | 1.16E-12              | 0               | 0              | title=Overlapping E       |
| MFS mice 8             | PKBALPHA              | 2.05E-12              | 0               | 0              | title=Overlapping E       |
| MFS mice 9             | CDK2                  | 2.83E-12              | 0               | 0              | title=Overlapping E       |
| MFS mice 10            | ERK1                  | 1.43E-11              | 0               | 0              | title=Overlapping E       |
| MFS mice 11            | MAPK1                 | 1.49E-11              | 0               | 0              | title=Overlapping E       |
| MFS mice 12            | GSK3BETA              | 2.60E-11              | 0               | 0              | title=Overlapping E       |
| MFS mice 13            | JNK1                  | 4.29E-10              | 0               | 0              | title=Overlapping E       |
| MFS mice 14            | ERK2                  | 5.43E-10              | 0               | 0              | title=Overlapping E       |
| MFS mice 15            | MAPK3                 | 1.15E-09              | 0               | 0              | title=Overlapping E       |
| MFS mice 16            | TGFBR2                | 8.35E-09              | 0               | 0              | title=Overlapping E       |
| MFS mice 17            | ABL1                  | 1.14E-08              | 0               | 0              | title=Overlapping E       |
| MFS mice 18            | CK2ALPHA              | 2.88E-08              | 0               | 0              | title=Overlapping E       |
| MFS mice 19            | PKBBETA               | 3.61E-08              | 0               | 0              | title=Overlapping E       |
| MFS mice 20            | ATM                   | 4.05E-08              | 0               | 0              | title=Overlapping E       |
| MFS mice 21            | DNAPK                 | 4.35E-08              | 0               | 0              | title=Overlapping E       |
| MFS mice 22            | GSK3ALPHA             | 6.75E-08              | 0               | 0              | title=Overlapping E       |
| MFS mice 23            | IKKALPHA              | 8.53E-08              | 0               | 0              | title=Overlapping E       |
| MFS mice 24            | CDC2                  | 3.18E-07              | 0               | 0              | title=Overlapping E       |
| MFS mice 25            | RPS6KA3               | 0.000001875           | 0               | 0              | title=Overlapping E       |
| MFS mice 26            | RAF1                  | 0.000002174           | 0               | 0              | title=Overlapping E       |
| MFS mice 27            | MAPK8                 | 0.000003258           | 0               | 0              | title=Overlapping E       |
| MFS mice 28            | PKBGAMMA              | 0.000004339           | 0               | 0              | title=Overlapping E       |
| MFS mice 29            | GSK                   | 0.000004339           | 0               | 0              | title=Overlapping E       |
| MFS mice 30            | IKKBETA               | 0.000005045           | 0               | 0              | title=Overlapping E       |
| MFS mice 31            | PRKCD                 | 0.000005118           | 0               | 0              | title=Overlapping E       |
| MFS mice 32            | CHEK2                 | 0.000007351           | 0               | 0              | title=Overlapping E       |
| MFS mice 33            | MAP3K7                | 0.000009839           | 0               | 0              | title=Overlapping E       |
| MFS mice 34            | CDK5                  | 0.00001005            | 0               | 0              | title=Overlapping E       |
| MFS mice 35            | PIM1                  | 0.00001173            | 0               | 0              | title=Overlapping E       |
| MFS mice 36            | PRKCZ                 | 0.00002274            | 0               | 0              | title=Overlapping E       |
| MFS mice 37            | AURKA                 | 0.00002274            | 0               | 0              | title=Overlapping E       |
| MFS mice 38            | PRKCA                 | 0.0000235             | 0               | 0              | title=Overlapping E       |
| MFS mice 39            | TGFBR1                | 0.0000245             | 0               | 0              | title=Overlapping E       |
| MFS mice 40            | PKR                   | 0.00003413            | 0               | 0              | title=Overlapping E       |
| MFS mice 41            | CHEK1                 | 0.00004091            | 0               | 0              | title=Overlapping E       |
| MFS mice 42            | NLK                   | 0.00004853            | 0               | 0              | title=Overlapping E       |
| MFS mice 43            | CDK8                  | 0.00006176            | 0               | 0              | title=Overlapping E       |
| MFS mice 44            | MAP2K3                | 0.00006742            | 0               | 0              | title=Overlapping E       |
| MFS mice 45            | CDK3                  | 0.00009509            | 0               | 0              | title=Overlapping E       |

|             |          |            |   |   |                     |
|-------------|----------|------------|---|---|---------------------|
| MFS mice 46 | JNK2     | 0.00009509 | 0 | 0 | title=Overlapping E |
| MFS mice 47 | IKK      | 0.0001161  | 0 | 0 | title=Overlapping E |
| MFS mice 48 | TBK1     | 0.0001235  | 0 | 0 | title=Overlapping E |
| MFS mice 49 | IKBKE    | 0.0001329  | 0 | 0 | title=Overlapping E |
| MFS mice 50 | CHUK     | 0.0001764  | 0 | 0 | title=Overlapping E |
| MFS mice 51 | AKT2     | 0.0002089  | 0 | 0 | title=Overlapping E |
| MFS mice 52 | MAPK11   | 0.0002708  | 0 | 0 | title=Overlapping E |
| MFS mice 53 | PKCIOTA  | 0.0004203  | 0 | 0 | title=Overlapping E |
| MFS mice 54 | PDHK1    | 0.0004524  | 0 | 0 | title=Overlapping E |
| MFS mice 55 | PRKCB    | 0.0005203  | 0 | 0 | title=Overlapping E |
| MFS mice 56 | SRC      | 0.000557   | 0 | 0 | title=Overlapping E |
| MFS mice 57 | PRKDC    | 0.000819   | 0 | 0 | title=Overlapping E |
| MFS mice 58 | UHMK1    | 0.0008451  | 0 | 0 | title=Overlapping E |
| MFS mice 59 | MTOR     | 0.0009056  | 0 | 0 | title=Overlapping E |
| MFS mice 60 | CSNK1A1  | 0.0009307  | 0 | 0 | title=Overlapping E |
| MFS mice 61 | CDK9     | 0.00145    | 0 | 0 | title=Overlapping E |
| MFS mice 62 | IKBKB    | 0.001473   | 0 | 0 | title=Overlapping E |
| MFS mice 63 | CSNK1E   | 0.001653   | 0 | 0 | title=Overlapping E |
| MFS mice 64 | CK2A2    | 0.001768   | 0 | 0 | title=Overlapping E |
| MFS mice 65 | PKCALPHA | 0.00214    | 0 | 0 | title=Overlapping E |
| MFS mice 66 | DYRK2    | 0.002306   | 0 | 0 | title=Overlapping E |
| MFS mice 67 | CK2      | 0.002432   | 0 | 0 | title=Overlapping E |
| MFS mice 68 | PRKACA   | 0.002448   | 0 | 0 | title=Overlapping E |
| MFS mice 69 | RPS6KB1  | 0.002585   | 0 | 0 | title=Overlapping E |
| MFS mice 70 | RPS6KA5  | 0.002729   | 0 | 0 | title=Overlapping E |
| MFS mice 71 | MAP2K1   | 0.003263   | 0 | 0 | title=Overlapping E |
| MFS mice 72 | PRKAA1   | 0.003391   | 0 | 0 | title=Overlapping E |
| MFS mice 73 | CAM      | 0.00341    | 0 | 0 | title=Overlapping E |
| MFS mice 74 | CDK7     | 0.003849   | 0 | 0 | title=Overlapping E |
| MFS mice 75 | EGFR     | 0.004302   | 0 | 0 | title=Overlapping E |
| MFS mice 76 | RPS6KA1  | 0.004989   | 0 | 0 | title=Overlapping E |
| MFS mice 77 | PBK      | 0.005064   | 0 | 0 | title=Overlapping E |
| MFS mice 78 | GSK3A    | 0.005295   | 0 | 0 | title=Overlapping E |
| MFS mice 79 | JAK2     | 0.006029   | 0 | 0 | title=Overlapping E |
| MFS mice 80 | MOK      | 0.006208   | 0 | 0 | title=Overlapping E |
| MFS mice 81 | CK1ALPHA | 0.006652   | 0 | 0 | title=Overlapping E |
| MFS mice 82 | MELK     | 0.006833   | 0 | 0 | title=Overlapping E |
| MFS mice 83 | DNA      | 0.007122   | 0 | 0 | title=Overlapping E |
| MFS mice 84 | MAPK10   | 0.007251   | 0 | 0 | title=Overlapping E |
| MFS mice 85 | CAMK2A   | 0.007263   | 0 | 0 | title=Overlapping E |
| MFS mice 86 | TNK2     | 0.007494   | 0 | 0 | title=Overlapping E |
| MFS mice 87 | MAPK9    | 0.007614   | 0 | 0 | title=Overlapping E |
| MFS mice 88 | CDK6     | 0.008191   | 0 | 0 | title=Overlapping E |
| MFS mice 89 | CAMK4    | 0.008191   | 0 | 0 | title=Overlapping E |
| MFS mice 90 | CAMK2D   | 0.008926   | 0 | 0 | title=Overlapping E |
| MFS mice 91 | PKD1     | 0.01016    | 0 | 0 | title=Overlapping E |
| MFS mice 92 | CAMKIV   | 0.01027    | 0 | 0 | title=Overlapping E |

|              |            |         |   |   |                     |
|--------------|------------|---------|---|---|---------------------|
| MFS mice 93  | BMPR1B     | 0.01136 | 0 | 0 | title=Overlapping E |
| MFS mice 94  | BRD2       | 0.01392 | 0 | 0 | title=Overlapping E |
| MFS mice 95  | RET        | 0.01513 | 0 | 0 | title=Overlapping E |
| MFS mice 96  | ALK        | 0.01513 | 0 | 0 | title=Overlapping E |
| MFS mice 97  | MARK2      | 0.01618 | 0 | 0 | title=Overlapping E |
| MFS mice 98  | ERBB2      | 0.01718 | 0 | 0 | title=Overlapping E |
| MFS mice 99  | ACTR2B     | 0.01805 | 0 | 0 | title=Overlapping E |
| MFS mice 100 | PRKAA2     | 0.01838 | 0 | 0 | title=Overlapping E |
| MFS mice 101 | PAK2       | 0.02047 | 0 | 0 | title=Overlapping E |
| MFS mice 102 | BARK1      | 0.02133 | 0 | 0 | title=Overlapping E |
| MFS mice 103 | PKC        | 0.02401 | 0 | 0 | title=Overlapping E |
| MFS mice 104 | PKCEPSILON | 0.02495 | 0 | 0 | title=Overlapping E |
| MFS mice 105 | TRKA       | 0.02507 | 0 | 0 | title=Overlapping E |
| MFS mice 106 | ATR        | 0.0252  | 0 | 0 | title=Overlapping E |
| MFS mice 107 | AURORAA    | 0.02591 | 0 | 0 | title=Overlapping E |
| MFS mice 108 | FOXO3      | 0.02599 | 0 | 0 | title=Overlapping E |
| MFS mice 109 | TRIM33     | 0.02599 | 0 | 0 | title=Overlapping E |
| MFS mice 110 | HASPIN     | 0.02599 | 0 | 0 | title=Overlapping E |
| MFS mice 111 | TGM2       | 0.02599 | 0 | 0 | title=Overlapping E |
| MFS mice 112 | LYK5       | 0.02599 | 0 | 0 | title=Overlapping E |
| MFS mice 113 | PIKFYVE    | 0.02599 | 0 | 0 | title=Overlapping E |
| MFS mice 114 | PRKCI      | 0.02878 | 0 | 0 | title=Overlapping E |
| MFS mice 115 | ACVR2B     | 0.03028 | 0 | 0 | title=Overlapping E |
| MFS mice 116 | PKA        | 0.03302 | 0 | 0 | title=Overlapping E |
| MFS mice 117 | PKCTHETA   | 0.03334 | 0 | 0 | title=Overlapping E |
| MFS mice 118 | MERTK      | 0.04182 | 0 | 0 | title=Overlapping E |
| MFS mice 119 | RPS6KA4    | 0.04493 | 0 | 0 | title=Overlapping E |
| MFS mice 120 | PKAGAMMA   | 0.04533 | 0 | 0 | title=Overlapping E |
| MFS mice 121 | PIM2       | 0.04811 | 0 | 0 | title=Overlapping E |
| MFS mice 122 | EPHA8      | 0.04811 | 0 | 0 | title=Overlapping E |
| MFS mice 123 | MAP3K20    | 0.05131 | 0 | 0 | title=Overlapping E |
| MFS mice 124 | VRK1       | 0.05138 | 0 | 0 | title=Overlapping E |
| MFS mice 125 | ILK        | 0.05138 | 0 | 0 | title=Overlapping E |
| MFS mice 126 | AURKB      | 0.05705 | 0 | 0 | title=Overlapping E |
| MFS mice 127 | SGK1       | 0.05917 | 0 | 0 | title=Overlapping E |
| MFS mice 128 | DYRK1B     | 0.06164 | 0 | 0 | title=Overlapping E |
| MFS mice 129 | MAPKAPK2   | 0.06345 | 0 | 0 | title=Overlapping E |
| MFS mice 130 | PRKACB     | 0.06521 | 0 | 0 | title=Overlapping E |
| MFS mice 131 | PKAALPHA   | 0.06687 | 0 | 0 | title=Overlapping E |
| MFS mice 132 | PKN1       | 0.06884 | 0 | 0 | title=Overlapping E |
| MFS mice 133 | AXL        | 0.06884 | 0 | 0 | title=Overlapping E |
| MFS mice 134 | FER        | 0.06884 | 0 | 0 | title=Overlapping E |
| MFS mice 135 | PAK1       | 0.07549 | 0 | 0 | title=Overlapping E |
| MFS mice 136 | PKM        | 0.07598 | 0 | 0 | title=Overlapping E |
| MFS mice 137 | PRKD1      | 0.07712 | 0 | 0 | title=Overlapping E |
| MFS mice 138 | MAP3K5     | 0.08399 | 0 | 0 | title=Overlapping E |
| MFS mice 139 | PAK6       | 0.08399 | 0 | 0 | title=Overlapping E |

|              |             |         |   |   |                     |
|--------------|-------------|---------|---|---|---------------------|
| MFS mice 140 | PKG1CGKI    | 0.08793 | 0 | 0 | title=Overlapping E |
| MFS mice 141 | CHK2        | 0.08808 | 0 | 0 | title=Overlapping E |
| MFS mice 142 | PDHK2       | 0.08808 | 0 | 0 | title=Overlapping E |
| MFS mice 143 | NIK         | 0.08808 | 0 | 0 | title=Overlapping E |
| MFS mice 144 | RSK         | 0.1     | 0 | 0 | title=Overlapping E |
| MFS mice 145 | RSK3        | 0.1     | 0 | 0 | title=Overlapping E |
| MFS mice 146 | PLK3        | 0.1     | 0 | 0 | title=Overlapping E |
| MFS mice 147 | MAP2K2      | 0.1084  | 0 | 0 | title=Overlapping E |
| MFS mice 148 | DYRK1A      | 0.1084  | 0 | 0 | title=Overlapping E |
| MFS mice 149 | CSNK2A2     | 0.1195  | 0 | 0 | title=Overlapping E |
| MFS mice 150 | MAP2K6      | 0.1212  | 0 | 0 | title=Overlapping E |
| MFS mice 151 | TRRAP       | 0.1234  | 0 | 0 | title=Overlapping E |
| MFS mice 152 | CK1GAMMA1   | 0.1234  | 0 | 0 | title=Overlapping E |
| MFS mice 153 | CSNK1D      | 0.1255  | 0 | 0 | title=Overlapping E |
| MFS mice 154 | PRKCG       | 0.1344  | 0 | 0 | title=Overlapping E |
| MFS mice 155 | PKC         | 0.1349  | 0 | 0 | title=Overlapping E |
| MFS mice 156 | CK1         | 0.1349  | 0 | 0 | title=Overlapping E |
| MFS mice 157 | JNK3        | 0.1462  | 0 | 0 | title=Overlapping E |
| MFS mice 158 | MAP2K4      | 0.1524  | 0 | 0 | title=Overlapping E |
| MFS mice 159 | PDGFRALPHA  | 0.1574  | 0 | 0 | title=Overlapping E |
| MFS mice 160 | TTK         | 0.1613  | 0 | 0 | title=Overlapping E |
| MFS mice 161 | CK1DELTA    | 0.1662  | 0 | 0 | title=Overlapping E |
| MFS mice 162 | CAMKIIBETA  | 0.1662  | 0 | 0 | title=Overlapping E |
| MFS mice 163 | P70S6K      | 0.1685  | 0 | 0 | title=Overlapping E |
| MFS mice 164 | ABL         | 0.1802  | 0 | 0 | title=Overlapping E |
| MFS mice 165 | ERBB3       | 0.1849  | 0 | 0 | title=Overlapping E |
| MFS mice 166 | RIPK3       | 0.1871  | 0 | 0 | title=Overlapping E |
| MFS mice 167 | PKC         | 0.1901  | 0 | 0 | title=Overlapping E |
| MFS mice 168 | CAMKIIALPHA | 0.1944  | 0 | 0 | title=Overlapping E |
| MFS mice 169 | TAF1        | 0.2007  | 0 | 0 | title=Overlapping E |
| MFS mice 170 | MAP3K8      | 0.2184  | 0 | 0 | title=Overlapping E |
| MFS mice 171 | TAOK1       | 0.2215  | 0 | 0 | title=Overlapping E |
| MFS mice 172 | MAST1       | 0.2215  | 0 | 0 | title=Overlapping E |
| MFS mice 173 | POMK        | 0.2215  | 0 | 0 | title=Overlapping E |
| MFS mice 174 | PRKCG       | 0.2232  | 0 | 0 | title=Overlapping E |
| MFS mice 175 | PRKG1       | 0.2232  | 0 | 0 | title=Overlapping E |
| MFS mice 176 | BTK         | 0.228   | 0 | 0 | title=Overlapping E |
| MFS mice 177 | PDK         | 0.2317  | 0 | 0 | title=Overlapping E |
| MFS mice 178 | ROR1        | 0.2317  | 0 | 0 | title=Overlapping E |
| MFS mice 179 | LRRK1       | 0.2317  | 0 | 0 | title=Overlapping E |
| MFS mice 180 | ULK4        | 0.2317  | 0 | 0 | title=Overlapping E |
| MFS mice 181 | MINK1       | 0.2317  | 0 | 0 | title=Overlapping E |
| MFS mice 182 | STK40       | 0.2317  | 0 | 0 | title=Overlapping E |
| MFS mice 183 | MAP4K5      | 0.2317  | 0 | 0 | title=Overlapping E |
| MFS mice 184 | PKDCC       | 0.2317  | 0 | 0 | title=Overlapping E |
| MFS mice 185 | MAST4       | 0.2317  | 0 | 0 | title=Overlapping E |
| MFS mice 186 | TYRO3       | 0.2418  | 0 | 0 | title=Overlapping E |

|              |            |        |   |   |                     |
|--------------|------------|--------|---|---|---------------------|
| MFS micε 187 | DMPK       | 0.2418 | 0 | 0 | title=Overlapping E |
| MFS micε 188 | PKMYT1     | 0.2418 | 0 | 0 | title=Overlapping E |
| MFS micε 189 | PRKX       | 0.2418 | 0 | 0 | title=Overlapping E |
| MFS micε 190 | LMTK2      | 0.2418 | 0 | 0 | title=Overlapping E |
| MFS micε 191 | MARK4      | 0.2418 | 0 | 0 | title=Overlapping E |
| MFS micε 192 | MAP3K14    | 0.2452 | 0 | 0 | title=Overlapping E |
| MFS micε 193 | PRKD3      | 0.2518 | 0 | 0 | title=Overlapping E |
| MFS micε 194 | FASTK      | 0.2518 | 0 | 0 | title=Overlapping E |
| MFS micε 195 | PIM3       | 0.2518 | 0 | 0 | title=Overlapping E |
| MFS micε 196 | TRIB3      | 0.2518 | 0 | 0 | title=Overlapping E |
| MFS micε 197 | GSG2       | 0.2518 | 0 | 0 | title=Overlapping E |
| MFS micε 198 | SGK2       | 0.2518 | 0 | 0 | title=Overlapping E |
| MFS micε 199 | PNCK       | 0.2518 | 0 | 0 | title=Overlapping E |
| MFS micε 200 | MAPK15     | 0.2518 | 0 | 0 | title=Overlapping E |
| MFS micε 201 | TYK2       | 0.2571 | 0 | 0 | title=Overlapping E |
| MFS micε 202 | HIPK1      | 0.2616 | 0 | 0 | title=Overlapping E |
| MFS micε 203 | NEK9       | 0.2616 | 0 | 0 | title=Overlapping E |
| MFS micε 204 | STK26      | 0.2616 | 0 | 0 | title=Overlapping E |
| MFS micε 205 | TLK1       | 0.2616 | 0 | 0 | title=Overlapping E |
| MFS micε 206 | SIK1       | 0.2616 | 0 | 0 | title=Overlapping E |
| MFS micε 207 | CAMKK2     | 0.2616 | 0 | 0 | title=Overlapping E |
| MFS micε 208 | MAP4K4     | 0.2616 | 0 | 0 | title=Overlapping E |
| MFS micε 209 | WEE1       | 0.2616 | 0 | 0 | title=Overlapping E |
| MFS micε 210 | MAPK13     | 0.262  | 0 | 0 | title=Overlapping E |
| MFS micε 211 | CDK16      | 0.2713 | 0 | 0 | title=Overlapping E |
| MFS micε 212 | CSNK1G2    | 0.2713 | 0 | 0 | title=Overlapping E |
| MFS micε 213 | CSNK1G1    | 0.2713 | 0 | 0 | title=Overlapping E |
| MFS micε 214 | MAP3K11    | 0.2713 | 0 | 0 | title=Overlapping E |
| MFS micε 215 | TTN        | 0.2713 | 0 | 0 | title=Overlapping E |
| MFS micε 216 | DYRK3      | 0.2713 | 0 | 0 | title=Overlapping E |
| MFS micε 217 | AURKC      | 0.2713 | 0 | 0 | title=Overlapping E |
| MFS micε 218 | NUAK1      | 0.2808 | 0 | 0 | title=Overlapping E |
| MFS micε 219 | CAMKK1     | 0.2808 | 0 | 0 | title=Overlapping E |
| MFS micε 220 | GRK5       | 0.2808 | 0 | 0 | title=Overlapping E |
| MFS micε 221 | MKNK2      | 0.2808 | 0 | 0 | title=Overlapping E |
| MFS micε 222 | INSR       | 0.2815 | 0 | 0 | title=Overlapping E |
| MFS micε 223 | NEK1       | 0.2903 | 0 | 0 | title=Overlapping E |
| MFS micε 224 | EPHB3      | 0.2903 | 0 | 0 | title=Overlapping E |
| MFS micε 225 | PRKCE      | 0.2912 | 0 | 0 | title=Overlapping E |
| MFS micε 226 | RPS6KA2    | 0.2996 | 0 | 0 | title=Overlapping E |
| MFS micε 227 | MOS        | 0.2996 | 0 | 0 | title=Overlapping E |
| MFS micε 228 | CK1EPSILON | 0.3088 | 0 | 0 | title=Overlapping E |
| MFS micε 229 | CLK2       | 0.3088 | 0 | 0 | title=Overlapping E |
| MFS micε 230 | RPS6KB2    | 0.3088 | 0 | 0 | title=Overlapping E |
| MFS micε 231 | PLK1       | 0.3116 | 0 | 0 | title=Overlapping E |
| MFS micε 232 | AKT3       | 0.3178 | 0 | 0 | title=Overlapping E |
| MFS micε 233 | SGK3       | 0.3178 | 0 | 0 | title=Overlapping E |

|              |           |        |   |   |                     |
|--------------|-----------|--------|---|---|---------------------|
| MFS micε 234 | IRAK1     | 0.3178 | 0 | 0 | title=Overlapping E |
| MFS micε 235 | MAP3K1    | 0.32   | 0 | 0 | title=Overlapping E |
| MFS micε 236 | JAK3      | 0.3268 | 0 | 0 | title=Overlapping E |
| MFS micε 237 | LKB1      | 0.3268 | 0 | 0 | title=Overlapping E |
| MFS micε 238 | EPHA1     | 0.3268 | 0 | 0 | title=Overlapping E |
| MFS micε 239 | PTK6      | 0.3268 | 0 | 0 | title=Overlapping E |
| MFS micε 240 | STK3      | 0.3268 | 0 | 0 | title=Overlapping E |
| MFS micε 241 | GRK2      | 0.3268 | 0 | 0 | title=Overlapping E |
| MFS micε 242 | MAPK7     | 0.3268 | 0 | 0 | title=Overlapping E |
| MFS micε 243 | PTK2B     | 0.3268 | 0 | 0 | title=Overlapping E |
| MFS micε 244 | PRKCH     | 0.3356 | 0 | 0 | title=Overlapping E |
| MFS micε 245 | JAK1      | 0.3356 | 0 | 0 | title=Overlapping E |
| MFS micε 246 | PDK1      | 0.3356 | 0 | 0 | title=Overlapping E |
| MFS micε 247 | LATS2     | 0.3356 | 0 | 0 | title=Overlapping E |
| MFS micε 248 | NEK6      | 0.3444 | 0 | 0 | title=Overlapping E |
| MFS micε 249 | LRRK2     | 0.3444 | 0 | 0 | title=Overlapping E |
| MFS micε 250 | CAMK1     | 0.3444 | 0 | 0 | title=Overlapping E |
| MFS micε 251 | LYN       | 0.3488 | 0 | 0 | title=Overlapping E |
| MFS micε 252 | DAPK1     | 0.353  | 0 | 0 | title=Overlapping E |
| MFS micε 253 | PLK2      | 0.353  | 0 | 0 | title=Overlapping E |
| MFS micε 254 | EIF2AK2   | 0.353  | 0 | 0 | title=Overlapping E |
| MFS micε 255 | EPHB1     | 0.3615 | 0 | 0 | title=Overlapping E |
| MFS micε 256 | DAPK3     | 0.3698 | 0 | 0 | title=Overlapping E |
| MFS micε 257 | CSK       | 0.3698 | 0 | 0 | title=Overlapping E |
| MFS micε 258 | LCK       | 0.381  | 0 | 0 | title=Overlapping E |
| MFS micε 259 | FGFR1     | 0.3863 | 0 | 0 | title=Overlapping E |
| MFS micε 260 | ULK1      | 0.4023 | 0 | 0 | title=Overlapping E |
| MFS micε 261 | STK11     | 0.4179 | 0 | 0 | title=Overlapping E |
| MFS micε 262 | SLK       | 0.4179 | 0 | 0 | title=Overlapping E |
| MFS micε 263 | PDGFRBETA | 0.4179 | 0 | 0 | title=Overlapping E |
| MFS micε 264 | KIT       | 0.4179 | 0 | 0 | title=Overlapping E |
| MFS micε 265 | ABL2      | 0.4256 | 0 | 0 | title=Overlapping E |
| MFS micε 266 | RIPK1     | 0.4331 | 0 | 0 | title=Overlapping E |
| MFS micε 267 | MET       | 0.4406 | 0 | 0 | title=Overlapping E |
| MFS micε 268 | RIPK2     | 0.4479 | 0 | 0 | title=Overlapping E |
| MFS micε 269 | PRKD2     | 0.4552 | 0 | 0 | title=Overlapping E |
| MFS micε 270 | PTK2      | 0.4624 | 0 | 0 | title=Overlapping E |
| MFS micε 271 | PAK3      | 0.4624 | 0 | 0 | title=Overlapping E |
| MFS micε 272 | PDPK1     | 0.4694 | 0 | 0 | title=Overlapping E |
| MFS micε 273 | FYN       | 0.4751 | 0 | 0 | title=Overlapping E |
| MFS micε 274 | PAK4      | 0.4764 | 0 | 0 | title=Overlapping E |
| MFS micε 275 | PKABETA   | 0.4901 | 0 | 0 | title=Overlapping E |
| MFS micε 276 | FGR       | 0.4968 | 0 | 0 | title=Overlapping E |
| MFS micε 277 | ROCK1     | 0.6192 | 0 | 0 | title=Overlapping E |
| MFS micε 278 | AURORAB   | 0.6437 | 0 | 0 | title=Overlapping E |
| MFS micε 279 | MAPK12    | 0.6796 | 0 | 0 | title=Overlapping E |
| MFS micε 280 | MAP3K3    | 0.7098 | 0 | 0 | title=Overlapping E |

|             |           |             |   |   |                       |
|-------------|-----------|-------------|---|---|-----------------------|
| MFS mou 1   | CSNK2A1   | 9.70E-18    | 0 | 0 | title=Overlapping E   |
| MFS mou 2   | MAPK1     | 9.45E-17    | 0 | 0 | title=Overlapping E   |
| MFS mou 3   | MAPK3     | 2.12E-16    | 0 | 0 | title=Overlapping E   |
| MFS mou 4   | HIPK2     | 4.85E-16    | 0 | 0 | title=Overlapping E   |
| MFS mou 5   | ERK1      | 7.00E-16    | 0 | 0 | title=Overlapping E   |
| MFS mou 6   | MAPK14    | 8.13E-14    | 0 | 0 | title=Overlapping E   |
| MFS mou 7   | CDK1      | 4.07E-13    | 0 | 0 | title=Overlapping E   |
| MFS mou 8   | AKT1      | 2.37E-12    | 0 | 0 | title=Overlapping E   |
| MFS mou 9   | CK2ALPHA  | 6.54E-12    | 0 | 0 | title=Overlapping E   |
| MFS mou 10  | MAPK8     | 3.15E-11    | 0 | 0 | title=Overlapping E   |
| MFS mou 11  | ERK2      | 6.15E-11    | 0 | 0 | title=Overlapping E   |
| MFS mou 12  | CDK4      | 1.21E-10    | 0 | 0 | title=Overlapping E   |
| MFS mou 13  | GSK3B     | 1.94E-10    | 0 | 0 | title=Overlapping E   |
| MFS mou 14  | JNK1      | 9.25E-10    | 0 | 0 | title=Overlapping E   |
| MFS mou 15  | PRKCD     | 2.23E-09    | 0 | 0 | title=Overlapping E   |
| MFS mou 16  | CDC2      | 3.78E-08    | 0 | 0 | title=Overlapping E   |
| MFS mou 17  | PKBALPHA  | 3.81E-08    | 0 | 0 | title=Overlapping E   |
| MFS mou 18  | DNAPK     | 8.63E-08    | 0 | 0 | title=Overlapping E   |
| MFS mou 19  | CK2       | 1.63E-07    | 0 | 0 | title=Overlapping E   |
| MFS mou 20  | GSK3BETA  | 1.91E-07    | 0 | 0 | title=Overlapping E   |
| MFS mou 21  | CDK2      | 4.41E-07    | 0 | 0 | title=Overlapping E   |
| MFS mous 22 | ABL1      | 7.40E-07    | 0 | 0 | title=Overlapping Enr |
| MFS mous 23 | IKKBETA   | 0.000001967 | 0 | 0 | title=Overlapping Enr |
| MFS mous 24 | JNK2      | 0.000003212 | 0 | 0 | title=Overlapping Enr |
| MFS mous 25 | RAF1      | 0.000004008 | 0 | 0 | title=Overlapping Enr |
| MFS mous 26 | PRKCB     | 0.000006162 | 0 | 0 | title=Overlapping Enr |
| MFS mous 27 | RPS6KA3   | 0.000007138 | 0 | 0 | title=Overlapping Enr |
| MFS mous 28 | SRC       | 0.000007829 | 0 | 0 | title=Overlapping Enr |
| MFS mous 29 | PKD1      | 0.00001077  | 0 | 0 | title=Overlapping Enr |
| MFS mous 30 | PRKACA    | 0.00001313  | 0 | 0 | title=Overlapping Enr |
| MFS mous 31 | MAP2K4    | 0.00004177  | 0 | 0 | title=Overlapping Enr |
| MFS mous 32 | TBK1      | 0.00005059  | 0 | 0 | title=Overlapping Enr |
| MFS mous 33 | RPS6KA1   | 0.00005452  | 0 | 0 | title=Overlapping Enr |
| MFS mous 34 | CDK5      | 0.00007414  | 0 | 0 | title=Overlapping Enr |
| MFS mous 35 | MAPK9     | 0.0001024   | 0 | 0 | title=Overlapping Enr |
| MFS mous 36 | PRKCA     | 0.0001054   | 0 | 0 | title=Overlapping Enr |
| MFS mous 37 | ATM       | 0.0001428   | 0 | 0 | title=Overlapping Enr |
| MFS mous 38 | CHEK1     | 0.0002387   | 0 | 0 | title=Overlapping Enr |
| MFS mous 39 | CHEK2     | 0.0003474   | 0 | 0 | title=Overlapping Enr |
| MFS mous 40 | PRKDC     | 0.0003511   | 0 | 0 | title=Overlapping Enr |
| MFS mous 41 | GSK3ALPHA | 0.0004122   | 0 | 0 | title=Overlapping Enr |
| MFS mous 42 | GSK       | 0.0004414   | 0 | 0 | title=Overlapping Enr |
| MFS mous 43 | AURORAA   | 0.0004705   | 0 | 0 | title=Overlapping Enr |
| MFS mous 44 | PIM1      | 0.0004857   | 0 | 0 | title=Overlapping Enr |
| MFS mous 45 | CDK6      | 0.000498    | 0 | 0 | title=Overlapping Enr |
| MFS mous 46 | MAPK7     | 0.000498    | 0 | 0 | title=Overlapping Enr |
| MFS mous 47 | PRKCZ     | 0.0005      | 0 | 0 | title=Overlapping Enr |



|             |          |           |   |   |                       |
|-------------|----------|-----------|---|---|-----------------------|
| MFS mous 48 | CHUK     | 0.0005308 | 0 | 0 | title=Overlapping Enr |
| MFS mous 49 | IKBKB    | 0.0007081 | 0 | 0 | title=Overlapping Enr |
| MFS mous 50 | CSNK1E   | 0.000882  | 0 | 0 | title=Overlapping Enr |
| MFS mous 51 | MAP3K7   | 0.001139  | 0 | 0 | title=Overlapping Enr |
| MFS mous 52 | RET      | 0.00115   | 0 | 0 | title=Overlapping Enr |
| MFS mous 53 | MARK2    | 0.00126   | 0 | 0 | title=Overlapping Enr |
| MFS mous 54 | CSNK2A2  | 0.001369  | 0 | 0 | title=Overlapping Enr |
| MFS mous 55 | DYRK2    | 0.001377  | 0 | 0 | title=Overlapping Enr |
| MFS mous 56 | RPS6KA5  | 0.001634  | 0 | 0 | title=Overlapping Enr |
| MFS mous 57 | PRKAA1   | 0.001671  | 0 | 0 | title=Overlapping Enr |
| MFS mous 58 | MAP2K1   | 0.001768  | 0 | 0 | title=Overlapping Enr |
| MFS mous 59 | TGFBR2   | 0.001768  | 0 | 0 | title=Overlapping Enr |
| MFS mous 60 | PRKD1    | 0.001872  | 0 | 0 | title=Overlapping Enr |
| MFS mous 61 | ERBB2    | 0.001998  | 0 | 0 | title=Overlapping Enr |
| MFS mous 62 | PKA      | 0.002138  | 0 | 0 | title=Overlapping Enr |
| MFS mous 63 | LYN      | 0.002558  | 0 | 0 | title=Overlapping Enr |
| MFS mous 64 | CAM      | 0.002589  | 0 | 0 | title=Overlapping Enr |
| MFS mous 65 | IKK      | 0.002589  | 0 | 0 | title=Overlapping Enr |
| MFS mous 66 | PKBBETA  | 0.002603  | 0 | 0 | title=Overlapping Enr |
| MFS mous 67 | IKBKE    | 0.002734  | 0 | 0 | title=Overlapping Enr |
| MFS mous 68 | IKKALPHA | 0.003062  | 0 | 0 | title=Overlapping Enr |
| MFS mous 69 | MAPK11   | 0.003152  | 0 | 0 | title=Overlapping Enr |
| MFS mous 70 | AURKA    | 0.003179  | 0 | 0 | title=Overlapping Enr |
| MFS mous 71 | NIK      | 0.003426  | 0 | 0 | title=Overlapping Enr |
| MFS mous 72 | CK1ALPHA | 0.003675  | 0 | 0 | title=Overlapping Enr |
| MFS mous 73 | MAPK10   | 0.004424  | 0 | 0 | title=Overlapping Enr |
| MFS mous 74 | PKBGAMMA | 0.005081  | 0 | 0 | title=Overlapping Enr |
| MFS mous 75 | DNA      | 0.005425  | 0 | 0 | title=Overlapping Enr |
| MFS mous 76 | CK2A2    | 0.006597  | 0 | 0 | title=Overlapping Enr |
| MFS mous 77 | CDK3     | 0.006601  | 0 | 0 | title=Overlapping Enr |
| MFS mous 78 | EGFR     | 0.006981  | 0 | 0 | title=Overlapping Enr |
| MFS mous 79 | EIF2AK2  | 0.007161  | 0 | 0 | title=Overlapping Enr |
| MFS mous 80 | CAMKIV   | 0.00784   | 0 | 0 | title=Overlapping Enr |
| MFS mous 81 | CDK9     | 0.008363  | 0 | 0 | title=Overlapping Enr |
| MFS mous 82 | MAPKAPK2 | 0.00852   | 0 | 0 | title=Overlapping Enr |
| MFS mous 83 | BTK      | 0.00852   | 0 | 0 | title=Overlapping Enr |
| MFS mous 84 | MAP3K5   | 0.009006  | 0 | 0 | title=Overlapping Enr |
| MFS mous 85 | JNK3     | 0.009197  | 0 | 0 | title=Overlapping Enr |
| MFS mous 86 | ALK      | 0.01038   | 0 | 0 | title=Overlapping Enr |
| MFS mous 87 | MTOR     | 0.01052   | 0 | 0 | title=Overlapping Enr |
| MFS mous 88 | MAPK13   | 0.01178   | 0 | 0 | title=Overlapping Enr |
| MFS mous 89 | CDK7     | 0.0123    | 0 | 0 | title=Overlapping Enr |
| MFS mous 90 | PRKAA2   | 0.01265   | 0 | 0 | title=Overlapping Enr |
| MFS mous 91 | DYRK1A   | 0.01347   | 0 | 0 | title=Overlapping Enr |
| MFS mous 92 | CSNK1A1  | 0.01575   | 0 | 0 | title=Overlapping Enr |
| MFS mous 93 | CAMK2A   | 0.01603   | 0 | 0 | title=Overlapping Enr |
| MFS mous 94 | CSNK1D   | 0.01702   | 0 | 0 | title=Overlapping Enr |

|              |          |         |   |   |                       |
|--------------|----------|---------|---|---|-----------------------|
| MFS mous 95  | PRKCI    | 0.02    | 0 | 0 | title=Overlapping Enr |
| MFS mous 96  | GSK3A    | 0.02214 | 0 | 0 | title=Overlapping Enr |
| MFS mous 97  | FOXO3    | 0.02262 | 0 | 0 | title=Overlapping Enr |
| MFS mous 98  | PIKFYVE  | 0.02262 | 0 | 0 | title=Overlapping Enr |
| MFS mous 99  | PKCTHETA | 0.02326 | 0 | 0 | title=Overlapping Enr |
| MFS mous 100 | PDK      | 0.02335 | 0 | 0 | title=Overlapping Enr |
| MFS mous 101 | ACVR2B   | 0.02335 | 0 | 0 | title=Overlapping Enr |
| MFS mous 102 | PKMYT1   | 0.02549 | 0 | 0 | title=Overlapping Enr |
| MFS mous 103 | CSNK2B   | 0.02549 | 0 | 0 | title=Overlapping Enr |
| MFS mous 104 | HIPK1    | 0.03002 | 0 | 0 | title=Overlapping Enr |
| MFS mous 105 | MERTK    | 0.03239 | 0 | 0 | title=Overlapping Enr |
| MFS mous 106 | AURKB    | 0.03452 | 0 | 0 | title=Overlapping Enr |
| MFS mous 107 | NUAK1    | 0.03484 | 0 | 0 | title=Overlapping Enr |
| MFS mous 108 | PAK5     | 0.03484 | 0 | 0 | title=Overlapping Enr |
| MFS mous 109 | EPHA8    | 0.03735 | 0 | 0 | title=Overlapping Enr |
| MFS mous 110 | VRK1     | 0.03993 | 0 | 0 | title=Overlapping Enr |
| MFS mous 111 | RIPK3    | 0.04169 | 0 | 0 | title=Overlapping Enr |
| MFS mous 112 | MAP3K8   | 0.04198 | 0 | 0 | title=Overlapping Enr |
| MFS mous 113 | MELK     | 0.04258 | 0 | 0 | title=Overlapping Enr |
| MFS mous 114 | RPS6KB2  | 0.04258 | 0 | 0 | title=Overlapping Enr |
| MFS mous 115 | AKT3     | 0.04529 | 0 | 0 | title=Overlapping Enr |
| MFS mous 116 | TNK2     | 0.04529 | 0 | 0 | title=Overlapping Enr |
| MFS mous 117 | CDK8     | 0.04529 | 0 | 0 | title=Overlapping Enr |
| MFS mous 118 | DYRK1B   | 0.04806 | 0 | 0 | title=Overlapping Enr |
| MFS mous 119 | CAMK4    | 0.04806 | 0 | 0 | title=Overlapping Enr |
| MFS mous 120 | PDHK1    | 0.05005 | 0 | 0 | title=Overlapping Enr |
| MFS mous 121 | PRKACB   | 0.05089 | 0 | 0 | title=Overlapping Enr |
| MFS mous 122 | EEF2K    | 0.05089 | 0 | 0 | title=Overlapping Enr |
| MFS mous 123 | LATS2    | 0.05089 | 0 | 0 | title=Overlapping Enr |
| MFS mous 124 | CAMK2D   | 0.05089 | 0 | 0 | title=Overlapping Enr |
| MFS mous 125 | TEC      | 0.05089 | 0 | 0 | title=Overlapping Enr |
| MFS mous 126 | LRRK2    | 0.05379 | 0 | 0 | title=Overlapping Enr |
| MFS mous 127 | AXL      | 0.05379 | 0 | 0 | title=Overlapping Enr |
| MFS mous 128 | FER      | 0.05379 | 0 | 0 | title=Overlapping Enr |
| MFS mous 129 | ATR      | 0.05502 | 0 | 0 | title=Overlapping Enr |
| MFS mous 130 | MAPKAPK5 | 0.05674 | 0 | 0 | title=Overlapping Enr |
| MFS mous 131 | BARK1    | 0.06252 | 0 | 0 | title=Overlapping Enr |
| MFS mous 132 | DAPK3    | 0.0628  | 0 | 0 | title=Overlapping Enr |
| MFS mous 133 | MAP3K14  | 0.06315 | 0 | 0 | title=Overlapping Enr |
| MFS mous 134 | INSR     | 0.06441 | 0 | 0 | title=Overlapping Enr |
| MFS mous 135 | PAK6     | 0.06591 | 0 | 0 | title=Overlapping Enr |
| MFS mous 136 | MAP3K3   | 0.0661  | 0 | 0 | title=Overlapping Enr |
| MFS mous 137 | PKM      | 0.06634 | 0 | 0 | title=Overlapping Enr |
| MFS mous 138 | PKCALPHA | 0.06745 | 0 | 0 | title=Overlapping Enr |
| MFS mous 139 | PKC      | 0.06827 | 0 | 0 | title=Overlapping Enr |
| MFS mous 140 | PKG1CGKI | 0.06907 | 0 | 0 | title=Overlapping Enr |
| MFS mous 141 | FYN      | 0.07463 | 0 | 0 | title=Overlapping Enr |

|              |             |         |   |   |                       |
|--------------|-------------|---------|---|---|-----------------------|
| MFS mous 142 | CHK2        | 0.07697 | 0 | 0 | title=Overlapping Enr |
| MFS mous 143 | CHK1        | 0.07697 | 0 | 0 | title=Overlapping Enr |
| MFS mous 144 | PDHK2       | 0.07697 | 0 | 0 | title=Overlapping Enr |
| MFS mous 145 | MAPK12      | 0.07837 | 0 | 0 | title=Overlapping Enr |
| MFS mous 146 | PLK3        | 0.07884 | 0 | 0 | title=Overlapping Enr |
| MFS mous 147 | STK11       | 0.08219 | 0 | 0 | title=Overlapping Enr |
| MFS mous 148 | MAP2K7      | 0.08219 | 0 | 0 | title=Overlapping Enr |
| MFS mous 149 | PDGFRBETA   | 0.08219 | 0 | 0 | title=Overlapping Enr |
| MFS mous 150 | KIT         | 0.08219 | 0 | 0 | title=Overlapping Enr |
| MFS mous 151 | RSK         | 0.08747 | 0 | 0 | title=Overlapping Enr |
| MFS mous 152 | PKR         | 0.08902 | 0 | 0 | title=Overlapping Enr |
| MFS mous 153 | RIPK1       | 0.08902 | 0 | 0 | title=Overlapping Enr |
| MFS mous 154 | PKCIOTA     | 0.09601 | 0 | 0 | title=Overlapping Enr |
| MFS mous 155 | RIPK2       | 0.09601 | 0 | 0 | title=Overlapping Enr |
| MFS mous 156 | MAP2K6      | 0.09601 | 0 | 0 | title=Overlapping Enr |
| MFS mous 157 | AURORA      | 0.09786 | 0 | 0 | title=Overlapping Enr |
| MFS mous 158 | PRKD2       | 0.09956 | 0 | 0 | title=Overlapping Enr |
| MFS mous 159 | PAK3        | 0.1031  | 0 | 0 | title=Overlapping Enr |
| MFS mous 160 | TRRAP       | 0.1081  | 0 | 0 | title=Overlapping Enr |
| MFS mous 161 | RSK         | 0.1081  | 0 | 0 | title=Overlapping Enr |
| MFS mous 162 | CK1GAMMA1   | 0.1081  | 0 | 0 | title=Overlapping Enr |
| MFS mous 163 | MAP2K3      | 0.1104  | 0 | 0 | title=Overlapping Enr |
| MFS mous 164 | PAK4        | 0.1104  | 0 | 0 | title=Overlapping Enr |
| MFS mous 165 | PKC         | 0.1183  | 0 | 0 | title=Overlapping Enr |
| MFS mous 166 | STK17A      | 0.1183  | 0 | 0 | title=Overlapping Enr |
| MFS mous 167 | JAK2        | 0.1254  | 0 | 0 | title=Overlapping Enr |
| MFS mous 168 | LCK         | 0.128   | 0 | 0 | title=Overlapping Enr |
| MFS mous 169 | TP53RK      | 0.1283  | 0 | 0 | title=Overlapping Enr |
| MFS mous 170 | CK1DELTA    | 0.133   | 0 | 0 | title=Overlapping Enr |
| MFS mous 171 | IGF1R       | 0.133   | 0 | 0 | title=Overlapping Enr |
| MFS mous 172 | CAMKIIIBETA | 0.133   | 0 | 0 | title=Overlapping Enr |
| MFS mous 173 | TRKB        | 0.1383  | 0 | 0 | title=Overlapping Enr |
| MFS mous 174 | BRD2        | 0.1383  | 0 | 0 | title=Overlapping Enr |
| MFS mous 175 | ADRBK1      | 0.1383  | 0 | 0 | title=Overlapping Enr |
| MFS mous 176 | PKAALPHA    | 0.1452  | 0 | 0 | title=Overlapping Enr |
| MFS mous 177 | P70S6K      | 0.1481  | 0 | 0 | title=Overlapping Enr |
| MFS mous 178 | DMPK1       | 0.1481  | 0 | 0 | title=Overlapping Enr |
| MFS mous 179 | PKAGAMMA    | 0.1486  | 0 | 0 | title=Overlapping Enr |
| MFS mous 180 | ERBB3       | 0.1486  | 0 | 0 | title=Overlapping Enr |
| MFS mous 181 | AKT2        | 0.1566  | 0 | 0 | title=Overlapping Enr |
| MFS mous 182 | CAMKIIALPHA | 0.1566  | 0 | 0 | title=Overlapping Enr |
| MFS mous 183 | ACTR2B      | 0.1578  | 0 | 0 | title=Overlapping Enr |
| MFS mous 184 | PAK1        | 0.1587  | 0 | 0 | title=Overlapping Enr |
| MFS mous 185 | PKC         | 0.1674  | 0 | 0 | title=Overlapping Enr |
| MFS mous 186 | TAF1        | 0.1769  | 0 | 0 | title=Overlapping Enr |
| MFS mous 187 | PRKG1       | 0.1808  | 0 | 0 | title=Overlapping Enr |
| MFS mous 188 | TRKA        | 0.1862  | 0 | 0 | title=Overlapping Enr |

|              |          |        |   |   |                       |
|--------------|----------|--------|---|---|-----------------------|
| MFS mous 189 | RPS6KB1  | 0.189  | 0 | 0 | title=Overlapping Enr |
| MFS mous 190 | HIPK4    | 0.1955 | 0 | 0 | title=Overlapping Enr |
| MFS mous 191 | TAOK1    | 0.1955 | 0 | 0 | title=Overlapping Enr |
| MFS mous 192 | TNNI3K   | 0.1955 | 0 | 0 | title=Overlapping Enr |
| MFS mous 193 | BMP2K    | 0.1955 | 0 | 0 | title=Overlapping Enr |
| MFS mous 194 | LMTK3    | 0.1955 | 0 | 0 | title=Overlapping Enr |
| MFS mous 195 | MAST1    | 0.1955 | 0 | 0 | title=Overlapping Enr |
| MFS mous 196 | SCYL2    | 0.1955 | 0 | 0 | title=Overlapping Enr |
| MFS mous 197 | POMK     | 0.1955 | 0 | 0 | title=Overlapping Enr |
| MFS mous 198 | SYK      | 0.2014 | 0 | 0 | title=Overlapping Enr |
| MFS mous 199 | CDK10    | 0.2047 | 0 | 0 | title=Overlapping Enr |
| MFS mous 200 | CDK12    | 0.2047 | 0 | 0 | title=Overlapping Enr |
| MFS mous 201 | CDK13    | 0.2047 | 0 | 0 | title=Overlapping Enr |
| MFS mous 202 | CDKL2    | 0.2047 | 0 | 0 | title=Overlapping Enr |
| MFS mous 203 | ROR1     | 0.2047 | 0 | 0 | title=Overlapping Enr |
| MFS mous 204 | LRRK1    | 0.2047 | 0 | 0 | title=Overlapping Enr |
| MFS mous 205 | PKCETA   | 0.2047 | 0 | 0 | title=Overlapping Enr |
| MFS mous 206 | MAP4K5   | 0.2047 | 0 | 0 | title=Overlapping Enr |
| MFS mous 207 | WEE2     | 0.2047 | 0 | 0 | title=Overlapping Enr |
| MFS mous 208 | TYK2     | 0.2098 | 0 | 0 | title=Overlapping Enr |
| MFS mous 209 | PKCGAMMA | 0.2098 | 0 | 0 | title=Overlapping Enr |
| MFS mous 210 | TYRO3    | 0.2138 | 0 | 0 | title=Overlapping Enr |
| MFS mous 211 | DMPK     | 0.2138 | 0 | 0 | title=Overlapping Enr |
| MFS mous 212 | PKN3     | 0.2138 | 0 | 0 | title=Overlapping Enr |
| MFS mous 213 | NTRK3    | 0.2138 | 0 | 0 | title=Overlapping Enr |
| MFS mous 214 | PRKX     | 0.2138 | 0 | 0 | title=Overlapping Enr |
| MFS mous 215 | MARK4    | 0.2138 | 0 | 0 | title=Overlapping Enr |
| MFS mous 216 | SCYL1    | 0.2138 | 0 | 0 | title=Overlapping Enr |
| MFS mous 217 | CAMK1G   | 0.2138 | 0 | 0 | title=Overlapping Enr |
| MFS mous 218 | PLK1     | 0.2193 | 0 | 0 | title=Overlapping Enr |
| MFS mous 219 | PAK2     | 0.2223 | 0 | 0 | title=Overlapping Enr |
| MFS mous 220 | PRKD3    | 0.2227 | 0 | 0 | title=Overlapping Enr |
| MFS mous 221 | SMG1     | 0.2227 | 0 | 0 | title=Overlapping Enr |
| MFS mous 222 | PIM3     | 0.2227 | 0 | 0 | title=Overlapping Enr |
| MFS mous 223 | FLT3     | 0.2227 | 0 | 0 | title=Overlapping Enr |
| MFS mous 224 | PIK3CG   | 0.2227 | 0 | 0 | title=Overlapping Enr |
| MFS mous 225 | TLK2     | 0.2227 | 0 | 0 | title=Overlapping Enr |
| MFS mous 226 | TRIB3    | 0.2227 | 0 | 0 | title=Overlapping Enr |
| MFS mous 227 | CAM      | 0.2227 | 0 | 0 | title=Overlapping Enr |
| MFS mous 228 | SGK2     | 0.2227 | 0 | 0 | title=Overlapping Enr |
| MFS mous 229 | MAPK15   | 0.2227 | 0 | 0 | title=Overlapping Enr |
| MFS mous 230 | AURORAB  | 0.2265 | 0 | 0 | title=Overlapping Enr |
| MFS mous 231 | EIF2AK1  | 0.2316 | 0 | 0 | title=Overlapping Enr |
| MFS mous 232 | MAP3K6   | 0.2316 | 0 | 0 | title=Overlapping Enr |
| MFS mous 233 | VRK2     | 0.2316 | 0 | 0 | title=Overlapping Enr |
| MFS mous 234 | MAP3K10  | 0.2316 | 0 | 0 | title=Overlapping Enr |
| MFS mous 235 | SIK1     | 0.2316 | 0 | 0 | title=Overlapping Enr |

|              |            |        |   |   |                       |
|--------------|------------|--------|---|---|-----------------------|
| MFS mous 236 | CAMKK2     | 0.2316 | 0 | 0 | title=Overlapping Enr |
| MFS mous 237 | MAP4K4     | 0.2316 | 0 | 0 | title=Overlapping Enr |
| MFS mous 238 | MAPK6      | 0.2316 | 0 | 0 | title=Overlapping Enr |
| MFS mous 239 | WEE1       | 0.2316 | 0 | 0 | title=Overlapping Enr |
| MFS mous 240 | CDK16      | 0.2403 | 0 | 0 | title=Overlapping Enr |
| MFS mous 241 | FRK        | 0.2403 | 0 | 0 | title=Overlapping Enr |
| MFS mous 242 | CSNK1G1    | 0.2403 | 0 | 0 | title=Overlapping Enr |
| MFS mous 243 | MAP2K5     | 0.2403 | 0 | 0 | title=Overlapping Enr |
| MFS mous 244 | TTN        | 0.2403 | 0 | 0 | title=Overlapping Enr |
| MFS mous 245 | DYRK3      | 0.2403 | 0 | 0 | title=Overlapping Enr |
| MFS mous 246 | PKCEPSILON | 0.2434 | 0 | 0 | title=Overlapping Enr |
| MFS mous 247 | PBK        | 0.249  | 0 | 0 | title=Overlapping Enr |
| MFS mous 248 | RPS6KA4    | 0.249  | 0 | 0 | title=Overlapping Enr |
| MFS mous 249 | CAMKK1     | 0.249  | 0 | 0 | title=Overlapping Enr |
| MFS mous 250 | GRK5       | 0.249  | 0 | 0 | title=Overlapping Enr |
| MFS mous 251 | GRK6       | 0.249  | 0 | 0 | title=Overlapping Enr |
| MFS mous 252 | MAP3K1     | 0.2492 | 0 | 0 | title=Overlapping Enr |
| MFS mous 253 | PIM2       | 0.2576 | 0 | 0 | title=Overlapping Enr |
| MFS mous 254 | EPHB3      | 0.2576 | 0 | 0 | title=Overlapping Enr |
| MFS mous 255 | RPS6KA2    | 0.266  | 0 | 0 | title=Overlapping Enr |
| MFS mous 256 | MOK        | 0.266  | 0 | 0 | title=Overlapping Enr |
| MFS mous 257 | MOS        | 0.266  | 0 | 0 | title=Overlapping Enr |
| MFS mous 258 | ILK        | 0.266  | 0 | 0 | title=Overlapping Enr |
| MFS mous 259 | MAPKAPK3   | 0.2744 | 0 | 0 | title=Overlapping Enr |
| MFS mous 260 | PRKG2      | 0.2744 | 0 | 0 | title=Overlapping Enr |
| MFS mous 261 | CK1EPSILON | 0.2744 | 0 | 0 | title=Overlapping Enr |
| MFS mous 262 | SGK3       | 0.2827 | 0 | 0 | title=Overlapping Enr |
| MFS mous 263 | IRAK1      | 0.2827 | 0 | 0 | title=Overlapping Enr |
| MFS mous 264 | LATS1      | 0.2827 | 0 | 0 | title=Overlapping Enr |
| MFS mous 265 | JAK3       | 0.2909 | 0 | 0 | title=Overlapping Enr |
| MFS mous 266 | BMX        | 0.2909 | 0 | 0 | title=Overlapping Enr |
| MFS mous 267 | UHMK1      | 0.2909 | 0 | 0 | title=Overlapping Enr |
| MFS mous 268 | EPHA1      | 0.2909 | 0 | 0 | title=Overlapping Enr |
| MFS mous 269 | PTK6       | 0.2909 | 0 | 0 | title=Overlapping Enr |
| MFS mous 270 | PRKCH      | 0.299  | 0 | 0 | title=Overlapping Enr |
| MFS mous 271 | JAK1       | 0.299  | 0 | 0 | title=Overlapping Enr |
| MFS mous 272 | FLT1       | 0.299  | 0 | 0 | title=Overlapping Enr |
| MFS mous 273 | PDK1       | 0.299  | 0 | 0 | title=Overlapping Enr |
| MFS mous 274 | PKN1       | 0.307  | 0 | 0 | title=Overlapping Enr |
| MFS mous 275 | NEK6       | 0.307  | 0 | 0 | title=Overlapping Enr |
| MFS mous 276 | CAMK1      | 0.307  | 0 | 0 | title=Overlapping Enr |
| MFS mous 277 | DAPK1      | 0.3149 | 0 | 0 | title=Overlapping Enr |
| MFS mous 278 | YES1       | 0.3149 | 0 | 0 | title=Overlapping Enr |
| MFS mous 279 | EPHB1      | 0.3227 | 0 | 0 | title=Overlapping Enr |
| MFS mous 280 | CSK        | 0.3305 | 0 | 0 | title=Overlapping Enr |
| MFS mous 281 | PDGFRB     | 0.3305 | 0 | 0 | title=Overlapping Enr |
| MFS mous 282 | TTK        | 0.3361 | 0 | 0 | title=Overlapping Enr |

|              |           |             |   |   |                       |
|--------------|-----------|-------------|---|---|-----------------------|
| MFS mous 283 | FGFR1     | 0.3457      | 0 | 0 | title=Overlapping Enr |
| MFS mous 284 | ITK       | 0.3531      | 0 | 0 | title=Overlapping Enr |
| MFS mous 285 | ARAF      | 0.3605      | 0 | 0 | title=Overlapping Enr |
| MFS mous 286 | ULK1      | 0.3605      | 0 | 0 | title=Overlapping Enr |
| MFS mous 287 | HCK       | 0.3751      | 0 | 0 | title=Overlapping Enr |
| MFS mous 288 | MAP2K2    | 0.3822      | 0 | 0 | title=Overlapping Enr |
| MFS mous 289 | ABL2      | 0.3822      | 0 | 0 | title=Overlapping Enr |
| MFS mous 290 | MET       | 0.3962      | 0 | 0 | title=Overlapping Enr |
| MFS mous 291 | NLK       | 0.41        | 0 | 0 | title=Overlapping Enr |
| MFS mous 292 | PTK2      | 0.4167      | 0 | 0 | title=Overlapping Enr |
| MFS mous 293 | PRKCG     | 0.4234      | 0 | 0 | title=Overlapping Enr |
| MFS mous 294 | NEK2      | 0.4234      | 0 | 0 | title=Overlapping Enr |
| MFS mous 295 | PDPK1     | 0.4234      | 0 | 0 | title=Overlapping Enr |
| MFS mous 296 | KDR       | 0.443       | 0 | 0 | title=Overlapping Enr |
| MFS mous 297 | PKABETA   | 0.443       | 0 | 0 | title=Overlapping Enr |
| MFS mous 298 | PLK4      | 0.4741      | 0 | 0 | title=Overlapping Enr |
| MFS mous 299 | SGK1      | 0.5314      | 0 | 0 | title=Overlapping Enr |
| MFS mous 300 | PRKCQ     | 0.5367      | 0 | 0 | title=Overlapping Enr |
| MFS mous 301 | PRKCE     | 0.6059      | 0 | 0 | title=Overlapping Enr |
| MFS mous 1   | CSNK2A1   | 5.24E-18    | 0 | 0 | title=Overlapping Enr |
| MFS mous 2   | MAPK1     | 1.81E-17    | 0 | 0 | title=Overlapping Enr |
| MFS mous 3   | MAPK14    | 5.17E-17    | 0 | 0 | title=Overlapping Enr |
| MFS mous 4   | MAPK3     | 6.10E-16    | 0 | 0 | title=Overlapping Enr |
| MFS mous 5   | HIPK2     | 3.87E-14    | 0 | 0 | title=Overlapping Enr |
| MFS mous 6   | ERK1      | 4.45E-14    | 0 | 0 | title=Overlapping Enr |
| MFS mous 7   | CDK1      | 2.58E-13    | 0 | 0 | title=Overlapping Enr |
| MFS mous 8   | CK2ALPHA  | 2.91E-13    | 0 | 0 | title=Overlapping Enr |
| MFS mous 9   | CDK4      | 4.51E-13    | 0 | 0 | title=Overlapping Enr |
| MFS mous 10  | AKT1      | 8.64E-13    | 0 | 0 | title=Overlapping Enr |
| MFS mous 11  | GSK3B     | 2.61E-11    | 0 | 0 | title=Overlapping Enr |
| MFS mous 12  | ERK2      | 3.13E-10    | 0 | 0 | title=Overlapping Enr |
| MFS mous 13  | GSK3BETA  | 1.45E-09    | 0 | 0 | title=Overlapping Enr |
| MFS mous 14  | JNK1      | 6.94E-09    | 0 | 0 | title=Overlapping Enr |
| MFS mous 15  | MAPK8     | 7.19E-09    | 0 | 0 | title=Overlapping Enr |
| MFS mous 16  | CDK2      | 2.57E-08    | 0 | 0 | title=Overlapping Enr |
| MFS mous 17  | CK2       | 1.11E-07    | 0 | 0 | title=Overlapping Enr |
| MFS mous 18  | PKBALPHA  | 1.44E-07    | 0 | 0 | title=Overlapping Enr |
| MFS mous 19  | PRKCA     | 4.40E-07    | 0 | 0 | title=Overlapping Enr |
| MFS mous 20  | CDC2      | 6.72E-07    | 0 | 0 | title=Overlapping Enr |
| MFS mous 21  | RPS6KA3   | 0.000004195 | 0 | 0 | title=Overlapping Enr |
| MFS mous 22  | PRKACA    | 0.00001571  | 0 | 0 | title=Overlapping Enr |
| MFS mous 23  | IKKBETA   | 0.00001906  | 0 | 0 | title=Overlapping Enr |
| MFS mous 24  | GSK3ALPHA | 0.00003253  | 0 | 0 | title=Overlapping Enr |
| MFS mous 25  | TBK1      | 0.00003806  | 0 | 0 | title=Overlapping Enr |
| MFS mous 26  | PRKCD     | 0.00003924  | 0 | 0 | title=Overlapping Enr |
| MFS mous 27  | IKBKE     | 0.00004103  | 0 | 0 | title=Overlapping Enr |
| MFS mous 28  | AURORAA   | 0.00004753  | 0 | 0 | title=Overlapping Enr |

|             |          |            |   |   |                       |
|-------------|----------|------------|---|---|-----------------------|
| MFS mous 29 | CHUK     | 0.00005487 | 0 | 0 | title=Overlapping Enr |
| MFS mous 30 | ABL1     | 0.0001166  | 0 | 0 | title=Overlapping Enr |
| MFS mous 31 | CHEK1    | 0.0001655  | 0 | 0 | title=Overlapping Enr |
| MFS mous 32 | IKKALPHA | 0.0001899  | 0 | 0 | title=Overlapping Enr |
| MFS mous 33 | NLK      | 0.0001962  | 0 | 0 | title=Overlapping Enr |
| MFS mous 34 | SRC      | 0.0002147  | 0 | 0 | title=Overlapping Enr |
| MFS mous 35 | PRKAA1   | 0.0002158  | 0 | 0 | title=Overlapping Enr |
| MFS mous 36 | PKBBETA  | 0.0002366  | 0 | 0 | title=Overlapping Enr |
| MFS mous 37 | DNAPK    | 0.0002406  | 0 | 0 | title=Overlapping Enr |
| MFS mous 38 | RPS6KA1  | 0.0003276  | 0 | 0 | title=Overlapping Enr |
| MFS mous 39 | PKBGAMMA | 0.0003732  | 0 | 0 | title=Overlapping Enr |
| MFS mous 40 | PRKCZ    | 0.0003946  | 0 | 0 | title=Overlapping Enr |
| MFS mous 41 | CDK6     | 0.0004212  | 0 | 0 | title=Overlapping Enr |
| MFS mous 42 | JNK2     | 0.0005301  | 0 | 0 | title=Overlapping Enr |
| MFS mous 43 | IKBKB    | 0.0005602  | 0 | 0 | title=Overlapping Enr |
| MFS mous 44 | CK2A2    | 0.0007737  | 0 | 0 | title=Overlapping Enr |
| MFS mous 45 | CDK5     | 0.001223   | 0 | 0 | title=Overlapping Enr |
| MFS mous 46 | PDHK1    | 0.001292   | 0 | 0 | title=Overlapping Enr |
| MFS mous 47 | MAP2K1   | 0.001454   | 0 | 0 | title=Overlapping Enr |
| MFS mous 48 | TGFBR2   | 0.001454   | 0 | 0 | title=Overlapping Enr |
| MFS mous 49 | ERBB2    | 0.001595   | 0 | 0 | title=Overlapping Enr |
| MFS mous 50 | ATM      | 0.001693   | 0 | 0 | title=Overlapping Enr |
| MFS mous 51 | CDK7     | 0.001724   | 0 | 0 | title=Overlapping Enr |
| MFS mous 52 | PKA      | 0.001884   | 0 | 0 | title=Overlapping Enr |
| MFS mous 53 | PRKCB    | 0.002272   | 0 | 0 | title=Overlapping Enr |
| MFS mous 54 | IKK      | 0.002373   | 0 | 0 | title=Overlapping Enr |
| MFS mous 55 | MAP2K3   | 0.002381   | 0 | 0 | title=Overlapping Enr |
| MFS mous 56 | MAPK11   | 0.002526   | 0 | 0 | title=Overlapping Enr |
| MFS mous 57 | CHEK2    | 0.002555   | 0 | 0 | title=Overlapping Enr |
| MFS mous 58 | AURKA    | 0.002626   | 0 | 0 | title=Overlapping Enr |
| MFS mous 59 | GSK3A    | 0.002736   | 0 | 0 | title=Overlapping Enr |
| MFS mous 60 | PIM1     | 0.003335   | 0 | 0 | title=Overlapping Enr |
| MFS mous 61 | RAF1     | 0.003685   | 0 | 0 | title=Overlapping Enr |
| MFS mous 62 | MELK     | 0.00409    | 0 | 0 | title=Overlapping Enr |
| MFS mous 63 | CDK8     | 0.004492   | 0 | 0 | title=Overlapping Enr |
| MFS mous 64 | GSK      | 0.004492   | 0 | 0 | title=Overlapping Enr |
| MFS mous 65 | UHMK1    | 0.004919   | 0 | 0 | title=Overlapping Enr |
| MFS mous 66 | MAPK7    | 0.004919   | 0 | 0 | title=Overlapping Enr |
| MFS mous 67 | MAP3K7   | 0.005167   | 0 | 0 | title=Overlapping Enr |
| MFS mous 68 | CAMK2D   | 0.005368   | 0 | 0 | title=Overlapping Enr |
| MFS mous 69 | CDK3     | 0.005842   | 0 | 0 | title=Overlapping Enr |
| MFS mous 70 | CAMKIV   | 0.0072     | 0 | 0 | title=Overlapping Enr |
| MFS mous 71 | BTK      | 0.007311   | 0 | 0 | title=Overlapping Enr |
| MFS mous 72 | CDK9     | 0.00741    | 0 | 0 | title=Overlapping Enr |
| MFS mous 73 | PRKDC    | 0.008186   | 0 | 0 | title=Overlapping Enr |
| MFS mous 74 | MTOR     | 0.008787   | 0 | 0 | title=Overlapping Enr |
| MFS mous 75 | RET      | 0.009205   | 0 | 0 | title=Overlapping Enr |

|              |          |         |   |   |                       |
|--------------|----------|---------|---|---|-----------------------|
| MFS mous 76  | MAPK13   | 0.01014 | 0 | 0 | title=Overlapping Enr |
| MFS mous 77  | DYRK2    | 0.01053 | 0 | 0 | title=Overlapping Enr |
| MFS mous 78  | DYRK1A   | 0.01196 | 0 | 0 | title=Overlapping Enr |
| MFS mous 79  | RPS6KA5  | 0.01196 | 0 | 0 | title=Overlapping Enr |
| MFS mous 80  | CK1ALPHA | 0.01646 | 0 | 0 | title=Overlapping Enr |
| MFS mous 81  | TRKA     | 0.01776 | 0 | 0 | title=Overlapping Enr |
| MFS mous 82  | EGFR     | 0.01969 | 0 | 0 | title=Overlapping Enr |
| MFS mous 83  | CSNK2A2  | 0.02065 | 0 | 0 | title=Overlapping Enr |
| MFS mous 84  | MAP2K4   | 0.02073 | 0 | 0 | title=Overlapping Enr |
| MFS mous 85  | FYN      | 0.02105 | 0 | 0 | title=Overlapping Enr |
| MFS mous 86  | ACVR2B   | 0.0215  | 0 | 0 | title=Overlapping Enr |
| MFS mous 87  | FOXO3    | 0.02165 | 0 | 0 | title=Overlapping Enr |
| MFS mous 88  | TRIM33   | 0.02165 | 0 | 0 | title=Overlapping Enr |
| MFS mous 89  | LYK5     | 0.02165 | 0 | 0 | title=Overlapping Enr |
| MFS mous 90  | PIKFYVE  | 0.02165 | 0 | 0 | title=Overlapping Enr |
| MFS mous 91  | PKMYT1   | 0.02349 | 0 | 0 | title=Overlapping Enr |
| MFS mous 92  | ERBB3    | 0.0285  | 0 | 0 | title=Overlapping Enr |
| MFS mous 93  | MERTK    | 0.02987 | 0 | 0 | title=Overlapping Enr |
| MFS mous 94  | PAK5     | 0.03214 | 0 | 0 | title=Overlapping Enr |
| MFS mous 95  | CSNK1E   | 0.03223 | 0 | 0 | title=Overlapping Enr |
| MFS mous 96  | PKD1     | 0.03223 | 0 | 0 | title=Overlapping Enr |
| MFS mous 97  | EPHA8    | 0.03446 | 0 | 0 | title=Overlapping Enr |
| MFS mous 98  | RIPK3    | 0.03636 | 0 | 0 | title=Overlapping Enr |
| MFS mous 99  | ILK      | 0.03686 | 0 | 0 | title=Overlapping Enr |
| MFS mous 100 | MAP3K8   | 0.0376  | 0 | 0 | title=Overlapping Enr |
| MFS mous 101 | PKAALPHA | 0.03837 | 0 | 0 | title=Overlapping Enr |
| MFS mous 102 | TNK2     | 0.04183 | 0 | 0 | title=Overlapping Enr |
| MFS mous 103 | PRKACB   | 0.04704 | 0 | 0 | title=Overlapping Enr |
| MFS mous 104 | PRKCH    | 0.04704 | 0 | 0 | title=Overlapping Enr |
| MFS mous 105 | TEC      | 0.04704 | 0 | 0 | title=Overlapping Enr |
| MFS mous 106 | AXL      | 0.04973 | 0 | 0 | title=Overlapping Enr |
| MFS mous 107 | FER      | 0.04973 | 0 | 0 | title=Overlapping Enr |
| MFS mous 108 | EIF2AK2  | 0.05247 | 0 | 0 | title=Overlapping Enr |
| MFS mous 109 | MAP3K14  | 0.05542 | 0 | 0 | title=Overlapping Enr |
| MFS mous 110 | AURORAB  | 0.05623 | 0 | 0 | title=Overlapping Enr |
| MFS mous 111 | INSR     | 0.05795 | 0 | 0 | title=Overlapping Enr |
| MFS mous 112 | MAP3K5   | 0.06101 | 0 | 0 | title=Overlapping Enr |
| MFS mous 113 | PAK6     | 0.06101 | 0 | 0 | title=Overlapping Enr |
| MFS mous 114 | PKC      | 0.06146 | 0 | 0 | title=Overlapping Enr |
| MFS mous 115 | CSNK1A1  | 0.06326 | 0 | 0 | title=Overlapping Enr |
| MFS mous 116 | CAM      | 0.06357 | 0 | 0 | title=Overlapping Enr |
| MFS mous 117 | PKM      | 0.06357 | 0 | 0 | title=Overlapping Enr |
| MFS mous 118 | PKG1CGKI | 0.06395 | 0 | 0 | title=Overlapping Enr |
| MFS mous 119 | ALK      | 0.06695 | 0 | 0 | title=Overlapping Enr |
| MFS mous 120 | MARK2    | 0.06999 | 0 | 0 | title=Overlapping Enr |
| MFS mous 121 | MAPK12   | 0.07067 | 0 | 0 | title=Overlapping Enr |
| MFS mous 122 | CHK1     | 0.07376 | 0 | 0 | title=Overlapping Enr |



|              |             |         |   |   |                       |
|--------------|-------------|---------|---|---|-----------------------|
| MFS mous 123 | PDHK2       | 0.07376 | 0 | 0 | title=Overlapping Enr |
| MFS mous 124 | NIK         | 0.07376 | 0 | 0 | title=Overlapping Enr |
| MFS mous 125 | STK11       | 0.0762  | 0 | 0 | title=Overlapping Enr |
| MFS mous 126 | MAPK9       | 0.07846 | 0 | 0 | title=Overlapping Enr |
| MFS mous 127 | RIPK1       | 0.08258 | 0 | 0 | title=Overlapping Enr |
| MFS mous 128 | RSK         | 0.08385 | 0 | 0 | title=Overlapping Enr |
| MFS mous 129 | PLK1        | 0.08856 | 0 | 0 | title=Overlapping Enr |
| MFS mous 130 | PKCIOTA     | 0.08911 | 0 | 0 | title=Overlapping Enr |
| MFS mous 131 | RIPK2       | 0.08911 | 0 | 0 | title=Overlapping Enr |
| MFS mous 132 | MAP2K6      | 0.08911 | 0 | 0 | title=Overlapping Enr |
| MFS mous 133 | AURKB       | 0.09313 | 0 | 0 | title=Overlapping Enr |
| MFS mous 134 | AURORA      | 0.09383 | 0 | 0 | title=Overlapping Enr |
| MFS mous 135 | SGK         | 0.09383 | 0 | 0 | title=Overlapping Enr |
| MFS mous 136 | DNA         | 0.09383 | 0 | 0 | title=Overlapping Enr |
| MFS mous 137 | NEK2        | 0.09919 | 0 | 0 | title=Overlapping Enr |
| MFS mous 138 | PRKCI       | 0.1026  | 0 | 0 | title=Overlapping Enr |
| MFS mous 139 | TRRAP       | 0.1037  | 0 | 0 | title=Overlapping Enr |
| MFS mous 140 | RSK         | 0.1037  | 0 | 0 | title=Overlapping Enr |
| MFS mous 141 | CK1GAMMA1   | 0.1037  | 0 | 0 | title=Overlapping Enr |
| MFS mous 142 | PKCTHETA    | 0.1131  | 0 | 0 | title=Overlapping Enr |
| MFS mous 143 | PKC         | 0.1135  | 0 | 0 | title=Overlapping Enr |
| MFS mous 144 | CK1         | 0.1135  | 0 | 0 | title=Overlapping Enr |
| MFS mous 145 | JAK2        | 0.1167  | 0 | 0 | title=Overlapping Enr |
| MFS mous 146 | JNK3        | 0.1231  | 0 | 0 | title=Overlapping Enr |
| MFS mous 147 | CK1DELTA    | 0.1238  | 0 | 0 | title=Overlapping Enr |
| MFS mous 148 | IGF1R       | 0.1238  | 0 | 0 | title=Overlapping Enr |
| MFS mous 149 | CAMKIIIBETA | 0.1238  | 0 | 0 | title=Overlapping Enr |
| MFS mous 150 | MAPK10      | 0.1275  | 0 | 0 | title=Overlapping Enr |
| MFS mous 151 | TRKB        | 0.1327  | 0 | 0 | title=Overlapping Enr |
| MFS mous 152 | PDGFRALPHA  | 0.1327  | 0 | 0 | title=Overlapping Enr |
| MFS mous 153 | BRD2        | 0.1327  | 0 | 0 | title=Overlapping Enr |
| MFS mous 154 | PKAGAMMA    | 0.1385  | 0 | 0 | title=Overlapping Enr |
| MFS mous 155 | P70S6K      | 0.1421  | 0 | 0 | title=Overlapping Enr |
| MFS mous 156 | AKT2        | 0.146   | 0 | 0 | title=Overlapping Enr |
| MFS mous 157 | CAMKIIALPHA | 0.146   | 0 | 0 | title=Overlapping Enr |
| MFS mous 158 | ACTR2B      | 0.1515  | 0 | 0 | title=Overlapping Enr |
| MFS mous 159 | MAP3K3      | 0.1522  | 0 | 0 | title=Overlapping Enr |
| MFS mous 160 | ATR         | 0.155   | 0 | 0 | title=Overlapping Enr |
| MFS mous 161 | PKC         | 0.1607  | 0 | 0 | title=Overlapping Enr |
| MFS mous 162 | SGK1        | 0.1651  | 0 | 0 | title=Overlapping Enr |
| MFS mous 163 | MAPKAPK2    | 0.1728  | 0 | 0 | title=Overlapping Enr |
| MFS mous 164 | RPS6KB1     | 0.1767  | 0 | 0 | title=Overlapping Enr |
| MFS mous 165 | TAOK1       | 0.1879  | 0 | 0 | title=Overlapping Enr |
| MFS mous 166 | TNNI3K      | 0.1879  | 0 | 0 | title=Overlapping Enr |
| MFS mous 167 | TNIK        | 0.1879  | 0 | 0 | title=Overlapping Enr |
| MFS mous 168 | BMP2K       | 0.1879  | 0 | 0 | title=Overlapping Enr |
| MFS mous 169 | MAST1       | 0.1879  | 0 | 0 | title=Overlapping Enr |

|              |         |        |   |   |                       |
|--------------|---------|--------|---|---|-----------------------|
| MFS mous 170 | POMK    | 0.1879 | 0 | 0 | title=Overlapping Enr |
| MFS mous 171 | SYK     | 0.1885 | 0 | 0 | title=Overlapping Enr |
| MFS mous 172 | PRKD1   | 0.1964 | 0 | 0 | title=Overlapping Enr |
| MFS mous 173 | TYK2    | 0.1964 | 0 | 0 | title=Overlapping Enr |
| MFS mous 174 | PDK     | 0.1968 | 0 | 0 | title=Overlapping Enr |
| MFS mous 175 | CDK12   | 0.1968 | 0 | 0 | title=Overlapping Enr |
| MFS mous 176 | CDKL2   | 0.1968 | 0 | 0 | title=Overlapping Enr |
| MFS mous 177 | ROR1    | 0.1968 | 0 | 0 | title=Overlapping Enr |
| MFS mous 178 | LRRK1   | 0.1968 | 0 | 0 | title=Overlapping Enr |
| MFS mous 179 | MAP4K5  | 0.1968 | 0 | 0 | title=Overlapping Enr |
| MFS mous 180 | MAST4   | 0.1968 | 0 | 0 | title=Overlapping Enr |
| MFS mous 181 | WEE2    | 0.1968 | 0 | 0 | title=Overlapping Enr |
| MFS mous 182 | TYRO3   | 0.2055 | 0 | 0 | title=Overlapping Enr |
| MFS mous 183 | DMPK    | 0.2055 | 0 | 0 | title=Overlapping Enr |
| MFS mous 184 | PKN3    | 0.2055 | 0 | 0 | title=Overlapping Enr |
| MFS mous 185 | NTRK3   | 0.2055 | 0 | 0 | title=Overlapping Enr |
| MFS mous 186 | CSNK2B  | 0.2055 | 0 | 0 | title=Overlapping Enr |
| MFS mous 187 | PRKX    | 0.2055 | 0 | 0 | title=Overlapping Enr |
| MFS mous 188 | MARK4   | 0.2055 | 0 | 0 | title=Overlapping Enr |
| MFS mous 189 | SCYL1   | 0.2055 | 0 | 0 | title=Overlapping Enr |
| MFS mous 190 | CAMK1G  | 0.2055 | 0 | 0 | title=Overlapping Enr |
| MFS mous 191 | BARK1   | 0.2123 | 0 | 0 | title=Overlapping Enr |
| MFS mous 192 | PIM3    | 0.2142 | 0 | 0 | title=Overlapping Enr |
| MFS mous 193 | FLT3    | 0.2142 | 0 | 0 | title=Overlapping Enr |
| MFS mous 194 | TRIB3   | 0.2142 | 0 | 0 | title=Overlapping Enr |
| MFS mous 195 | CAM     | 0.2142 | 0 | 0 | title=Overlapping Enr |
| MFS mous 196 | SGK2    | 0.2142 | 0 | 0 | title=Overlapping Enr |
| MFS mous 197 | MAPK15  | 0.2142 | 0 | 0 | title=Overlapping Enr |
| MFS mous 198 | EIF2AK1 | 0.2228 | 0 | 0 | title=Overlapping Enr |
| MFS mous 199 | HIPK1   | 0.2228 | 0 | 0 | title=Overlapping Enr |
| MFS mous 200 | MAP3K6  | 0.2228 | 0 | 0 | title=Overlapping Enr |
| MFS mous 201 | STK26   | 0.2228 | 0 | 0 | title=Overlapping Enr |
| MFS mous 202 | MAP3K10 | 0.2228 | 0 | 0 | title=Overlapping Enr |
| MFS mous 203 | AMPKA2  | 0.2228 | 0 | 0 | title=Overlapping Enr |
| MFS mous 204 | SIK1    | 0.2228 | 0 | 0 | title=Overlapping Enr |
| MFS mous 205 | CAMKK2  | 0.2228 | 0 | 0 | title=Overlapping Enr |
| MFS mous 206 | MAP4K4  | 0.2228 | 0 | 0 | title=Overlapping Enr |
| MFS mous 207 | WEE1    | 0.2228 | 0 | 0 | title=Overlapping Enr |
| MFS mous 208 | MAP3K1  | 0.2293 | 0 | 0 | title=Overlapping Enr |
| MFS mous 209 | CDK16   | 0.2313 | 0 | 0 | title=Overlapping Enr |
| MFS mous 210 | FRK     | 0.2313 | 0 | 0 | title=Overlapping Enr |
| MFS mous 211 | CSNK1G1 | 0.2313 | 0 | 0 | title=Overlapping Enr |
| MFS mous 212 | TTN     | 0.2313 | 0 | 0 | title=Overlapping Enr |
| MFS mous 213 | DYRK3   | 0.2313 | 0 | 0 | title=Overlapping Enr |
| MFS mous 214 | PBK     | 0.2396 | 0 | 0 | title=Overlapping Enr |
| MFS mous 215 | RPS6KA4 | 0.2396 | 0 | 0 | title=Overlapping Enr |
| MFS mous 216 | CAMKK1  | 0.2396 | 0 | 0 | title=Overlapping Enr |

|              |            |        |   |   |                       |
|--------------|------------|--------|---|---|-----------------------|
| MFS mous 217 | GRK5       | 0.2396 | 0 | 0 | title=Overlapping Enr |
| MFS mous 218 | GRK6       | 0.2396 | 0 | 0 | title=Overlapping Enr |
| MFS mous 219 | BRSK1      | 0.2479 | 0 | 0 | title=Overlapping Enr |
| MFS mous 220 | EPHB3      | 0.2479 | 0 | 0 | title=Overlapping Enr |
| MFS mous 221 | LYN        | 0.2526 | 0 | 0 | title=Overlapping Enr |
| MFS mous 222 | VRK1       | 0.2562 | 0 | 0 | title=Overlapping Enr |
| MFS mous 223 | RPS6KA2    | 0.2562 | 0 | 0 | title=Overlapping Enr |
| MFS mous 224 | MOK        | 0.2562 | 0 | 0 | title=Overlapping Enr |
| MFS mous 225 | PRKG2      | 0.2643 | 0 | 0 | title=Overlapping Enr |
| MFS mous 226 | CK1EPSILON | 0.2643 | 0 | 0 | title=Overlapping Enr |
| MFS mous 227 | RPS6KB2    | 0.2643 | 0 | 0 | title=Overlapping Enr |
| MFS mous 228 | AKT3       | 0.2723 | 0 | 0 | title=Overlapping Enr |
| MFS mous 229 | SGK3       | 0.2723 | 0 | 0 | title=Overlapping Enr |
| MFS mous 230 | IRAK1      | 0.2723 | 0 | 0 | title=Overlapping Enr |
| MFS mous 231 | LATS1      | 0.2723 | 0 | 0 | title=Overlapping Enr |
| MFS mous 232 | LCK        | 0.2792 | 0 | 0 | title=Overlapping Enr |
| MFS mous 233 | JAK3       | 0.2803 | 0 | 0 | title=Overlapping Enr |
| MFS mous 234 | EPHA1      | 0.2803 | 0 | 0 | title=Overlapping Enr |
| MFS mous 235 | PTK6       | 0.2803 | 0 | 0 | title=Overlapping Enr |
| MFS mous 236 | CAMK4      | 0.2803 | 0 | 0 | title=Overlapping Enr |
| MFS mous 237 | PTK2B      | 0.2803 | 0 | 0 | title=Overlapping Enr |
| MFS mous 238 | JAK1       | 0.2881 | 0 | 0 | title=Overlapping Enr |
| MFS mous 239 | FLT1       | 0.2881 | 0 | 0 | title=Overlapping Enr |
| MFS mous 240 | PDK1       | 0.2881 | 0 | 0 | title=Overlapping Enr |
| MFS mous 241 | EEF2K      | 0.2881 | 0 | 0 | title=Overlapping Enr |
| MFS mous 242 | NEK6       | 0.2959 | 0 | 0 | title=Overlapping Enr |
| MFS mous 243 | LRRK2      | 0.2959 | 0 | 0 | title=Overlapping Enr |
| MFS mous 244 | MAPKAPK5   | 0.3036 | 0 | 0 | title=Overlapping Enr |
| MFS mous 245 | EPHB1      | 0.3112 | 0 | 0 | title=Overlapping Enr |
| MFS mous 246 | STK4       | 0.3112 | 0 | 0 | title=Overlapping Enr |
| MFS mous 247 | BMPR1B     | 0.3112 | 0 | 0 | title=Overlapping Enr |
| MFS mous 248 | CSK        | 0.3187 | 0 | 0 | title=Overlapping Enr |
| MFS mous 249 | FGFR1      | 0.3335 | 0 | 0 | title=Overlapping Enr |
| MFS mous 250 | ITK        | 0.3408 | 0 | 0 | title=Overlapping Enr |
| MFS mous 251 | ULK1       | 0.348  | 0 | 0 | title=Overlapping Enr |
| MFS mous 252 | PLK3       | 0.3552 | 0 | 0 | title=Overlapping Enr |
| MFS mous 253 | SLK        | 0.3622 | 0 | 0 | title=Overlapping Enr |
| MFS mous 254 | MAP2K7     | 0.3622 | 0 | 0 | title=Overlapping Enr |
| MFS mous 255 | PRKAA2     | 0.3622 | 0 | 0 | title=Overlapping Enr |
| MFS mous 256 | PDGFRBETA  | 0.3622 | 0 | 0 | title=Overlapping Enr |
| MFS mous 257 | HCK        | 0.3622 | 0 | 0 | title=Overlapping Enr |
| MFS mous 258 | KIT        | 0.3622 | 0 | 0 | title=Overlapping Enr |
| MFS mous 259 | MAP2K2     | 0.3692 | 0 | 0 | title=Overlapping Enr |
| MFS mous 260 | ABL2       | 0.3692 | 0 | 0 | title=Overlapping Enr |
| MFS mous 261 | PKR        | 0.3761 | 0 | 0 | title=Overlapping Enr |
| MFS mous 262 | PAK1       | 0.3767 | 0 | 0 | title=Overlapping Enr |
| MFS mous 263 | PRKD2      | 0.3964 | 0 | 0 | title=Overlapping Enr |

|               |            |             |   |   |                       |
|---------------|------------|-------------|---|---|-----------------------|
| MFS mous 264  | CSNK1D     | 0.3964      | 0 | 0 | title=Overlapping Enr |
| MFS mous 265  | PTK2       | 0.403       | 0 | 0 | title=Overlapping Enr |
| MFS mous 266  | CAMK2A     | 0.4037      | 0 | 0 | title=Overlapping Enr |
| MFS mous 267  | PRKCG      | 0.4095      | 0 | 0 | title=Overlapping Enr |
| MFS mous 268  | PDPK1      | 0.4095      | 0 | 0 | title=Overlapping Enr |
| MFS mous 269  | PKCALPHA   | 0.4265      | 0 | 0 | title=Overlapping Enr |
| MFS mous 270  | KDR        | 0.4287      | 0 | 0 | title=Overlapping Enr |
| MFS mous 271  | PKABETA    | 0.4287      | 0 | 0 | title=Overlapping Enr |
| MFS mous 272  | PLK4       | 0.4593      | 0 | 0 | title=Overlapping Enr |
| MFS mous 273  | ABL        | 0.4711      | 0 | 0 | title=Overlapping Enr |
| MFS mous 274  | TGFBR1     | 0.4883      | 0 | 0 | title=Overlapping Enr |
| MFS mous 275  | PRKCQ      | 0.5211      | 0 | 0 | title=Overlapping Enr |
| MFS mous 276  | PRKG1      | 0.5211      | 0 | 0 | title=Overlapping Enr |
| MFS mous 277  | PKCGAMMA   | 0.5567      | 0 | 0 | title=Overlapping Enr |
| MFS mous 278  | PAK2       | 0.5711      | 0 | 0 | title=Overlapping Enr |
| MFS mous 279  | PRKCE      | 0.5897      | 0 | 0 | title=Overlapping Enr |
| MFS mous 280  | PKCEPSILON | 0.5942      | 0 | 0 | title=Overlapping Enr |
| MFS mous 281  | TTK        | 0.6819      | 0 | 0 | title=Overlapping Enr |
| MFS patier 1  | CSNK2A1    | 2.03E-22    | 0 | 0 | title=Overlapping Enr |
| MFS patier 2  | HIPK2      | 2.25E-19    | 0 | 0 | title=Overlapping Enr |
| MFS patier 3  | CDK1       | 5.72E-18    | 0 | 0 | title=Overlapping Enr |
| MFS patier 4  | MAPK14     | 8.01E-18    | 0 | 0 | title=Overlapping Enr |
| MFS patier 5  | CDK4       | 6.34E-15    | 0 | 0 | title=Overlapping Enr |
| MFS patier 6  | MAPK3      | 7.88E-15    | 0 | 0 | title=Overlapping Enr |
| MFS patier 7  | MAPK1      | 1.04E-14    | 0 | 0 | title=Overlapping Enr |
| MFS patier 8  | GSK3B      | 9.17E-14    | 0 | 0 | title=Overlapping Enr |
| MFS patier 9  | CDK2       | 3.94E-13    | 0 | 0 | title=Overlapping Enr |
| MFS patier 10 | CDC2       | 5.05E-12    | 0 | 0 | title=Overlapping Enr |
| MFS patier 11 | GSK3BETA   | 2.23E-11    | 0 | 0 | title=Overlapping Enr |
| MFS patier 12 | DNAPK      | 3.89E-11    | 0 | 0 | title=Overlapping Enr |
| MFS patier 13 | CK2ALPHA   | 8.28E-11    | 0 | 0 | title=Overlapping Enr |
| MFS patier 14 | ERK1       | 1.10E-10    | 0 | 0 | title=Overlapping Enr |
| MFS patier 15 | ERK2       | 4.70E-10    | 0 | 0 | title=Overlapping Enr |
| MFS patier 16 | AKT1       | 1.66E-09    | 0 | 0 | title=Overlapping Enr |
| MFS patier 17 | RPS6KA3    | 1.91E-09    | 0 | 0 | title=Overlapping Enr |
| MFS patier 18 | JNK1       | 4.29E-09    | 0 | 0 | title=Overlapping Enr |
| MFS patier 19 | PKBALPHA   | 5.68E-09    | 0 | 0 | title=Overlapping Enr |
| MFS patier 20 | MAPK8      | 1.55E-08    | 0 | 0 | title=Overlapping Enr |
| MFS patier 21 | ATM        | 3.51E-08    | 0 | 0 | title=Overlapping Enr |
| MFS patier 22 | GSK3ALPHA  | 6.22E-08    | 0 | 0 | title=Overlapping Enr |
| MFS patier 23 | IKKBETA    | 3.86E-07    | 0 | 0 | title=Overlapping Enr |
| MFS patier 24 | CK2        | 5.05E-07    | 0 | 0 | title=Overlapping Enr |
| MFS patier 25 | IKKALPHA   | 0.000001529 | 0 | 0 | title=Overlapping Enr |
| MFS patier 26 | PRKCB      | 0.000004693 | 0 | 0 | title=Overlapping Enr |
| MFS patier 27 | TGFBR2     | 0.000008145 | 0 | 0 | title=Overlapping Enr |
| MFS patier 28 | ABL1       | 0.00001752  | 0 | 0 | title=Overlapping Enr |
| MFS patier 29 | CSNK1A1    | 0.00001803  | 0 | 0 | title=Overlapping Enr |

|               |          |            |   |   |                       |
|---------------|----------|------------|---|---|-----------------------|
| MFS patier 30 | AURORAA  | 0.00001958 | 0 | 0 | title=Overlapping Enr |
| MFS patier 31 | CSNK2A2  | 0.00002243 | 0 | 0 | title=Overlapping Enr |
| MFS patier 32 | CSNK1E   | 0.00002542 | 0 | 0 | title=Overlapping Enr |
| MFS patier 33 | PRKCD    | 0.00002819 | 0 | 0 | title=Overlapping Enr |
| MFS patier 34 | CHEK1    | 0.00003724 | 0 | 0 | title=Overlapping Enr |
| MFS patier 35 | CDK5     | 0.00004709 | 0 | 0 | title=Overlapping Enr |
| MFS patier 36 | MELK     | 0.00005062 | 0 | 0 | title=Overlapping Enr |
| MFS patier 37 | PRKCA    | 0.0000538  | 0 | 0 | title=Overlapping Enr |
| MFS patier 38 | PKBBETA  | 0.00005746 | 0 | 0 | title=Overlapping Enr |
| MFS patier 39 | PKBGAMMA | 0.00005905 | 0 | 0 | title=Overlapping Enr |
| MFS patier 40 | CDK6     | 0.00006852 | 0 | 0 | title=Overlapping Enr |
| MFS patier 41 | CHEK2    | 0.00007106 | 0 | 0 | title=Overlapping Enr |
| MFS patier 42 | JNK2     | 0.00009094 | 0 | 0 | title=Overlapping Enr |
| MFS patier 43 | PIM1     | 0.0001059  | 0 | 0 | title=Overlapping Enr |
| MFS patier 44 | PRKAA1   | 0.0001076  | 0 | 0 | title=Overlapping Enr |
| MFS patier 45 | RPS6KA1  | 0.0001253  | 0 | 0 | title=Overlapping Enr |
| MFS patier 46 | PRK CZ   | 0.0001552  | 0 | 0 | title=Overlapping Enr |
| MFS patier 47 | SRC      | 0.0001635  | 0 | 0 | title=Overlapping Enr |
| MFS patier 48 | PRKACA   | 0.0001729  | 0 | 0 | title=Overlapping Enr |
| MFS patier 49 | PKR      | 0.0003305  | 0 | 0 | title=Overlapping Enr |
| MFS patier 50 | PLK1     | 0.0003498  | 0 | 0 | title=Overlapping Enr |
| MFS patier 51 | GSK      | 0.0007242  | 0 | 0 | title=Overlapping Enr |
| MFS patier 52 | PRKDC    | 0.0007746  | 0 | 0 | title=Overlapping Enr |
| MFS patier 53 | TBK1     | 0.0007836  | 0 | 0 | title=Overlapping Enr |
| MFS patier 54 | IKBKE    | 0.0008336  | 0 | 0 | title=Overlapping Enr |
| MFS patier 55 | CHUK     | 0.001059   | 0 | 0 | title=Overlapping Enr |
| MFS patier 56 | CK1ALPHA | 0.001188   | 0 | 0 | title=Overlapping Enr |
| MFS patier 57 | ATR      | 0.001376   | 0 | 0 | title=Overlapping Enr |
| MFS patier 58 | CDK9     | 0.001401   | 0 | 0 | title=Overlapping Enr |
| MFS patier 59 | PKD1     | 0.001585   | 0 | 0 | title=Overlapping Enr |
| MFS patier 60 | CK2A2    | 0.001696   | 0 | 0 | title=Overlapping Enr |
| MFS patier 61 | RET      | 0.001865   | 0 | 0 | title=Overlapping Enr |
| MFS patier 62 | RAF1     | 0.002028   | 0 | 0 | title=Overlapping Enr |
| MFS patier 63 | PLK3     | 0.002228   | 0 | 0 | title=Overlapping Enr |
| MFS patier 64 | DYRK2    | 0.002228   | 0 | 0 | title=Overlapping Enr |
| MFS patier 65 | DYRK1A   | 0.002638   | 0 | 0 | title=Overlapping Enr |
| MFS patier 66 | PDHK1    | 0.002793   | 0 | 0 | title=Overlapping Enr |
| MFS patier 67 | IKK      | 0.003348   | 0 | 0 | title=Overlapping Enr |
| MFS patier 68 | NLK      | 0.003606   | 0 | 0 | title=Overlapping Enr |
| MFS patier 69 | CDK7     | 0.003698   | 0 | 0 | title=Overlapping Enr |
| MFS patier 70 | HIPK1    | 0.003952   | 0 | 0 | title=Overlapping Enr |
| MFS patier 71 | AURORAB  | 0.004112   | 0 | 0 | title=Overlapping Enr |
| MFS patier 72 | NIK      | 0.004426   | 0 | 0 | title=Overlapping Enr |
| MFS patier 73 | MAP2K3   | 0.004473   | 0 | 0 | title=Overlapping Enr |
| MFS patier 74 | MAP2K4   | 0.00547    | 0 | 0 | title=Overlapping Enr |
| MFS patier 75 | AURKA    | 0.005555   | 0 | 0 | title=Overlapping Enr |
| MFS patier 76 | CK1DELTA | 0.006607   | 0 | 0 | title=Overlapping Enr |

|                |           |          |   |   |                       |
|----------------|-----------|----------|---|---|-----------------------|
| MFS patier 77  | DNA       | 0.006994 | 0 | 0 | title=Overlapping Enr |
| MFS patier 78  | CDC7      | 0.007303 | 0 | 0 | title=Overlapping Enr |
| MFS patier 79  | CDK8      | 0.007303 | 0 | 0 | title=Overlapping Enr |
| MFS patier 80  | IKBKB     | 0.007324 | 0 | 0 | title=Overlapping Enr |
| MFS patier 81  | MAPK9     | 0.007324 | 0 | 0 | title=Overlapping Enr |
| MFS patier 82  | UHMK1     | 0.007983 | 0 | 0 | title=Overlapping Enr |
| MFS patier 83  | MAPK7     | 0.007983 | 0 | 0 | title=Overlapping Enr |
| MFS patier 84  | CK1GAMMA1 | 0.008476 | 0 | 0 | title=Overlapping Enr |
| MFS patier 85  | PKCALPHA  | 0.008584 | 0 | 0 | title=Overlapping Enr |
| MFS patier 86  | CDK3      | 0.009453 | 0 | 0 | title=Overlapping Enr |
| MFS patier 87  | EIF2AK2   | 0.01024  | 0 | 0 | title=Overlapping Enr |
| MFS patier 88  | BMPR1B    | 0.01107  | 0 | 0 | title=Overlapping Enr |
| MFS patier 89  | JNK3      | 0.01182  | 0 | 0 | title=Overlapping Enr |
| MFS patier 90  | SGK1      | 0.01208  | 0 | 0 | title=Overlapping Enr |
| MFS patier 91  | MAP3K5    | 0.01284  | 0 | 0 | title=Overlapping Enr |
| MFS patier 92  | PKG1CGKI  | 0.01378  | 0 | 0 | title=Overlapping Enr |
| MFS patier 93  | ALK       | 0.01476  | 0 | 0 | title=Overlapping Enr |
| MFS patier 94  | ERBB2     | 0.01656  | 0 | 0 | title=Overlapping Enr |
| MFS patier 95  | AURKB     | 0.01747  | 0 | 0 | title=Overlapping Enr |
| MFS patier 96  | MTOR      | 0.01772  | 0 | 0 | title=Overlapping Enr |
| MFS patier 97  | ACTR2B    | 0.01773  | 0 | 0 | title=Overlapping Enr |
| MFS patier 98  | STK11     | 0.01793  | 0 | 0 | title=Overlapping Enr |
| MFS patier 99  | PRKAA2    | 0.01793  | 0 | 0 | title=Overlapping Enr |
| MFS patier 100 | RPS6KA5   | 0.01906  | 0 | 0 | title=Overlapping Enr |
| MFS patier 101 | INSR      | 0.02153  | 0 | 0 | title=Overlapping Enr |
| MFS patier 102 | PKCIOTA   | 0.0227   | 0 | 0 | title=Overlapping Enr |
| MFS patier 103 | PKC       | 0.0233   | 0 | 0 | title=Overlapping Enr |
| MFS patier 104 | MAPK11    | 0.0236   | 0 | 0 | title=Overlapping Enr |
| MFS patier 105 | CSNK1D    | 0.02399  | 0 | 0 | title=Overlapping Enr |
| MFS patier 106 | FOXO3     | 0.02575  | 0 | 0 | title=Overlapping Enr |
| MFS patier 107 | TRIM33    | 0.02575  | 0 | 0 | title=Overlapping Enr |
| MFS patier 108 | LYK5      | 0.02575  | 0 | 0 | title=Overlapping Enr |
| MFS patier 109 | PIKFYVE   | 0.02575  | 0 | 0 | title=Overlapping Enr |
| MFS patier 110 | MAP3K14   | 0.02895  | 0 | 0 | title=Overlapping Enr |
| MFS patier 111 | ACVR2B    | 0.02976  | 0 | 0 | title=Overlapping Enr |
| MFS patier 112 | GSK3A     | 0.03103  | 0 | 0 | title=Overlapping Enr |
| MFS patier 113 | PKMYT1    | 0.03246  | 0 | 0 | title=Overlapping Enr |
| MFS patier 114 | PKA       | 0.03246  | 0 | 0 | title=Overlapping Enr |
| MFS patier 115 | MAPK15    | 0.03526  | 0 | 0 | title=Overlapping Enr |
| MFS patier 116 | AMPKA2    | 0.03814  | 0 | 0 | title=Overlapping Enr |
| MFS patier 117 | SIK1      | 0.03814  | 0 | 0 | title=Overlapping Enr |
| MFS patier 118 | MAP4K4    | 0.03814  | 0 | 0 | title=Overlapping Enr |
| MFS patier 119 | MERTK     | 0.04112  | 0 | 0 | title=Overlapping Enr |
| MFS patier 120 | EGFR      | 0.04156  | 0 | 0 | title=Overlapping Enr |
| MFS patier 121 | NUAK1     | 0.04417  | 0 | 0 | title=Overlapping Enr |
| MFS patier 122 | GRK5      | 0.04417  | 0 | 0 | title=Overlapping Enr |
| MFS patier 123 | EPHA8     | 0.04731  | 0 | 0 | title=Overlapping Enr |

|                |            |         |   |   |                       |
|----------------|------------|---------|---|---|-----------------------|
| MFS patier 124 | MARK3      | 0.04731 | 0 | 0 | title=Overlapping Enr |
| MFS patier 125 | TGFBR1     | 0.04798 | 0 | 0 | title=Overlapping Enr |
| MFS patier 126 | TTK        | 0.04986 | 0 | 0 | title=Overlapping Enr |
| MFS patier 127 | VRK1       | 0.05053 | 0 | 0 | title=Overlapping Enr |
| MFS patier 128 | ILK        | 0.05053 | 0 | 0 | title=Overlapping Enr |
| MFS patier 129 | CK1EPSILON | 0.05383 | 0 | 0 | title=Overlapping Enr |
| MFS patier 130 | TNK2       | 0.05719 | 0 | 0 | title=Overlapping Enr |
| MFS patier 131 | PRKG1      | 0.05993 | 0 | 0 | title=Overlapping Enr |
| MFS patier 132 | MAPKAPK2   | 0.06205 | 0 | 0 | title=Overlapping Enr |
| MFS patier 133 | BTK        | 0.06205 | 0 | 0 | title=Overlapping Enr |
| MFS patier 134 | PRKACB     | 0.06415 | 0 | 0 | title=Overlapping Enr |
| MFS patier 135 | EEF2K      | 0.06415 | 0 | 0 | title=Overlapping Enr |
| MFS patier 136 | LATS2      | 0.06415 | 0 | 0 | title=Overlapping Enr |
| MFS patier 137 | CAMK2D     | 0.06415 | 0 | 0 | title=Overlapping Enr |
| MFS patier 138 | RPS6KB1    | 0.0642  | 0 | 0 | title=Overlapping Enr |
| MFS patier 139 | LRRK2      | 0.06772 | 0 | 0 | title=Overlapping Enr |
| MFS patier 140 | AXL        | 0.06772 | 0 | 0 | title=Overlapping Enr |
| MFS patier 141 | FER        | 0.06772 | 0 | 0 | title=Overlapping Enr |
| MFS patier 142 | MAPKAPK5   | 0.07136 | 0 | 0 | title=Overlapping Enr |
| MFS patier 143 | MAP2K1     | 0.07313 | 0 | 0 | title=Overlapping Enr |
| MFS patier 144 | STK4       | 0.07507 | 0 | 0 | title=Overlapping Enr |
| MFS patier 145 | PKM        | 0.0753  | 0 | 0 | title=Overlapping Enr |
| MFS patier 146 | PRKD1      | 0.07545 | 0 | 0 | title=Overlapping Enr |
| MFS patier 147 | MAPK13     | 0.0778  | 0 | 0 | title=Overlapping Enr |
| MFS patier 148 | DAPK3      | 0.07883 | 0 | 0 | title=Overlapping Enr |
| MFS patier 149 | PAK6       | 0.08266 | 0 | 0 | title=Overlapping Enr |
| MFS patier 150 | CAMK2A     | 0.08614 | 0 | 0 | title=Overlapping Enr |
| MFS patier 151 | CHK2       | 0.08729 | 0 | 0 | title=Overlapping Enr |
| MFS patier 152 | CHK1       | 0.08729 | 0 | 0 | title=Overlapping Enr |
| MFS patier 153 | PDHK2      | 0.08729 | 0 | 0 | title=Overlapping Enr |
| MFS patier 154 | HSPB8      | 0.08729 | 0 | 0 | title=Overlapping Enr |
| MFS patier 155 | MARK2      | 0.09445 | 0 | 0 | title=Overlapping Enr |
| MFS patier 156 | PKC        | 0.09912 | 0 | 0 | title=Overlapping Enr |
| MFS patier 157 | RSK        | 0.09912 | 0 | 0 | title=Overlapping Enr |
| MFS patier 158 | MAP2K7     | 0.1026  | 0 | 0 | title=Overlapping Enr |
| MFS patier 159 | AURORA     | 0.1108  | 0 | 0 | title=Overlapping Enr |
| MFS patier 160 | SGK        | 0.1108  | 0 | 0 | title=Overlapping Enr |
| MFS patier 161 | TRRAP      | 0.1223  | 0 | 0 | title=Overlapping Enr |
| MFS patier 162 | PRKD2      | 0.1236  | 0 | 0 | title=Overlapping Enr |
| MFS patier 163 | PAK3       | 0.128   | 0 | 0 | title=Overlapping Enr |
| MFS patier 164 | NEK2       | 0.1323  | 0 | 0 | title=Overlapping Enr |
| MFS patier 165 | PKC        | 0.1337  | 0 | 0 | title=Overlapping Enr |
| MFS patier 166 | CAMKIV     | 0.1337  | 0 | 0 | title=Overlapping Enr |
| MFS patier 167 | STK17A     | 0.1337  | 0 | 0 | title=Overlapping Enr |
| MFS patier 168 | CK1        | 0.1337  | 0 | 0 | title=Overlapping Enr |
| MFS patier 169 | PRKCI      | 0.1367  | 0 | 0 | title=Overlapping Enr |
| MFS patier 170 | PAK4       | 0.1367  | 0 | 0 | title=Overlapping Enr |

|                |             |        |   |   |                       |
|----------------|-------------|--------|---|---|-----------------------|
| MFS patier 171 | MAP3K7      | 0.1428 | 0 | 0 | title=Overlapping Enr |
| MFS patier 172 | TP53RK      | 0.145  | 0 | 0 | title=Overlapping Enr |
| MFS patier 173 | KDR         | 0.1456 | 0 | 0 | title=Overlapping Enr |
| MFS patier 174 | PKCTHETA    | 0.1501 | 0 | 0 | title=Overlapping Enr |
| MFS patier 175 | JAK2        | 0.1547 | 0 | 0 | title=Overlapping Enr |
| MFS patier 176 | LYN         | 0.1559 | 0 | 0 | title=Overlapping Enr |
| MFS patier 177 | PDGFRALPHA  | 0.1561 | 0 | 0 | title=Overlapping Enr |
| MFS patier 178 | BRD2        | 0.1561 | 0 | 0 | title=Overlapping Enr |
| MFS patier 179 | P70S6K      | 0.167  | 0 | 0 | title=Overlapping Enr |
| MFS patier 180 | DMPK1       | 0.167  | 0 | 0 | title=Overlapping Enr |
| MFS patier 181 | PLK4        | 0.1684 | 0 | 0 | title=Overlapping Enr |
| MFS patier 182 | MAPK10      | 0.1684 | 0 | 0 | title=Overlapping Enr |
| MFS patier 183 | ABL         | 0.1776 | 0 | 0 | title=Overlapping Enr |
| MFS patier 184 | PKAGAMMA    | 0.1823 | 0 | 0 | title=Overlapping Enr |
| MFS patier 185 | ERBB3       | 0.1823 | 0 | 0 | title=Overlapping Enr |
| MFS patier 186 | PKC         | 0.1885 | 0 | 0 | title=Overlapping Enr |
| MFS patier 187 | AKT2        | 0.1917 | 0 | 0 | title=Overlapping Enr |
| MFS patier 188 | CAMKIIALPHA | 0.1917 | 0 | 0 | title=Overlapping Enr |
| MFS patier 189 | TAF1        | 0.199  | 0 | 0 | title=Overlapping Enr |
| MFS patier 190 | PAK1        | 0.2068 | 0 | 0 | title=Overlapping Enr |
| MFS patier 191 | TRKA        | 0.2094 | 0 | 0 | title=Overlapping Enr |
| MFS patier 192 | MAP3K8      | 0.2154 | 0 | 0 | title=Overlapping Enr |
| MFS patier 193 | HIPK4       | 0.2197 | 0 | 0 | title=Overlapping Enr |
| MFS patier 194 | TAOK1       | 0.2197 | 0 | 0 | title=Overlapping Enr |
| MFS patier 195 | TNNI3K      | 0.2197 | 0 | 0 | title=Overlapping Enr |
| MFS patier 196 | ROR2        | 0.2197 | 0 | 0 | title=Overlapping Enr |
| MFS patier 197 | BMP2K       | 0.2197 | 0 | 0 | title=Overlapping Enr |
| MFS patier 198 | RPS6KA6     | 0.2197 | 0 | 0 | title=Overlapping Enr |
| MFS patier 199 | MAST1       | 0.2197 | 0 | 0 | title=Overlapping Enr |
| MFS patier 200 | POMK        | 0.2197 | 0 | 0 | title=Overlapping Enr |
| MFS patier 201 | PDK         | 0.2298 | 0 | 0 | title=Overlapping Enr |
| MFS patier 202 | CDK13       | 0.2298 | 0 | 0 | title=Overlapping Enr |
| MFS patier 203 | ROR1        | 0.2298 | 0 | 0 | title=Overlapping Enr |
| MFS patier 204 | LRRK1       | 0.2298 | 0 | 0 | title=Overlapping Enr |
| MFS patier 205 | MINK1       | 0.2298 | 0 | 0 | title=Overlapping Enr |
| MFS patier 206 | MAP4K5      | 0.2298 | 0 | 0 | title=Overlapping Enr |
| MFS patier 207 | MAST4       | 0.2298 | 0 | 0 | title=Overlapping Enr |
| MFS patier 208 | WEE2        | 0.2298 | 0 | 0 | title=Overlapping Enr |
| MFS patier 209 | TYRO3       | 0.2399 | 0 | 0 | title=Overlapping Enr |
| MFS patier 210 | DMPK        | 0.2399 | 0 | 0 | title=Overlapping Enr |
| MFS patier 211 | NEK3        | 0.2399 | 0 | 0 | title=Overlapping Enr |
| MFS patier 212 | CSNK2B      | 0.2399 | 0 | 0 | title=Overlapping Enr |
| MFS patier 213 | PRKX        | 0.2399 | 0 | 0 | title=Overlapping Enr |
| MFS patier 214 | MARK4       | 0.2399 | 0 | 0 | title=Overlapping Enr |
| MFS patier 215 | SCYL1       | 0.2399 | 0 | 0 | title=Overlapping Enr |
| MFS patier 216 | SMG1        | 0.2497 | 0 | 0 | title=Overlapping Enr |
| MFS patier 217 | PIM3        | 0.2497 | 0 | 0 | title=Overlapping Enr |



|                |         |        |   |   |                       |
|----------------|---------|--------|---|---|-----------------------|
| MFS patier 218 | FLT3    | 0.2497 | 0 | 0 | title=Overlapping Enr |
| MFS patier 219 | PIK3CG  | 0.2497 | 0 | 0 | title=Overlapping Enr |
| MFS patier 220 | TRIB3   | 0.2497 | 0 | 0 | title=Overlapping Enr |
| MFS patier 221 | CAM     | 0.2497 | 0 | 0 | title=Overlapping Enr |
| MFS patier 222 | SGK2    | 0.2497 | 0 | 0 | title=Overlapping Enr |
| MFS patier 223 | FYN     | 0.2519 | 0 | 0 | title=Overlapping Enr |
| MFS patier 224 | MAP3K6  | 0.2595 | 0 | 0 | title=Overlapping Enr |
| MFS patier 225 | VRK2    | 0.2595 | 0 | 0 | title=Overlapping Enr |
| MFS patier 226 | TLK1    | 0.2595 | 0 | 0 | title=Overlapping Enr |
| MFS patier 227 | CAMKK2  | 0.2595 | 0 | 0 | title=Overlapping Enr |
| MFS patier 228 | WEE1    | 0.2595 | 0 | 0 | title=Overlapping Enr |
| MFS patier 229 | PAK2    | 0.2682 | 0 | 0 | title=Overlapping Enr |
| MFS patier 230 | CDK16   | 0.2691 | 0 | 0 | title=Overlapping Enr |
| MFS patier 231 | CSNK1G1 | 0.2691 | 0 | 0 | title=Overlapping Enr |
| MFS patier 232 | MAP2K5  | 0.2691 | 0 | 0 | title=Overlapping Enr |
| MFS patier 233 | TTN     | 0.2691 | 0 | 0 | title=Overlapping Enr |
| MFS patier 234 | DYRK3   | 0.2691 | 0 | 0 | title=Overlapping Enr |
| MFS patier 235 | AURKC   | 0.2691 | 0 | 0 | title=Overlapping Enr |
| MFS patier 236 | BARK1   | 0.273  | 0 | 0 | title=Overlapping Enr |
| MFS patier 237 | PBK     | 0.2786 | 0 | 0 | title=Overlapping Enr |
| MFS patier 238 | RPS6KA4 | 0.2786 | 0 | 0 | title=Overlapping Enr |
| MFS patier 239 | CAMKK1  | 0.2786 | 0 | 0 | title=Overlapping Enr |
| MFS patier 240 | GRK6    | 0.2786 | 0 | 0 | title=Overlapping Enr |
| MFS patier 241 | PIM2    | 0.288  | 0 | 0 | title=Overlapping Enr |
| MFS patier 242 | EPHB3   | 0.288  | 0 | 0 | title=Overlapping Enr |
| MFS patier 243 | RPS6KA2 | 0.2972 | 0 | 0 | title=Overlapping Enr |
| MFS patier 244 | MOK     | 0.2972 | 0 | 0 | title=Overlapping Enr |
| MFS patier 245 | PRKG2   | 0.3064 | 0 | 0 | title=Overlapping Enr |
| MFS patier 246 | RPS6KB2 | 0.3064 | 0 | 0 | title=Overlapping Enr |
| MFS patier 247 | MAPK12  | 0.3115 | 0 | 0 | title=Overlapping Enr |
| MFS patier 248 | AKT3    | 0.3154 | 0 | 0 | title=Overlapping Enr |
| MFS patier 249 | SGK3    | 0.3154 | 0 | 0 | title=Overlapping Enr |
| MFS patier 250 | IRAK1   | 0.3154 | 0 | 0 | title=Overlapping Enr |
| MFS patier 251 | LATS1   | 0.3154 | 0 | 0 | title=Overlapping Enr |
| MFS patier 252 | JAK3    | 0.3243 | 0 | 0 | title=Overlapping Enr |
| MFS patier 253 | DYRK1B  | 0.3243 | 0 | 0 | title=Overlapping Enr |
| MFS patier 254 | BMX     | 0.3243 | 0 | 0 | title=Overlapping Enr |
| MFS patier 255 | EPHA1   | 0.3243 | 0 | 0 | title=Overlapping Enr |
| MFS patier 256 | PTK6    | 0.3243 | 0 | 0 | title=Overlapping Enr |
| MFS patier 257 | CAMK4   | 0.3243 | 0 | 0 | title=Overlapping Enr |
| MFS patier 258 | GRK2    | 0.3243 | 0 | 0 | title=Overlapping Enr |
| MFS patier 259 | PTK2B   | 0.3243 | 0 | 0 | title=Overlapping Enr |
| MFS patier 260 | PRKCH   | 0.3331 | 0 | 0 | title=Overlapping Enr |
| MFS patier 261 | JAK1    | 0.3331 | 0 | 0 | title=Overlapping Enr |
| MFS patier 262 | FLT1    | 0.3331 | 0 | 0 | title=Overlapping Enr |
| MFS patier 263 | PDK1    | 0.3331 | 0 | 0 | title=Overlapping Enr |
| MFS patier 264 | TEC     | 0.3331 | 0 | 0 | title=Overlapping Enr |

|                |            |        |   |   |                       |
|----------------|------------|--------|---|---|-----------------------|
| MFS patier 265 | PKN1       | 0.3418 | 0 | 0 | title=Overlapping Enr |
| MFS patier 266 | NEK6       | 0.3418 | 0 | 0 | title=Overlapping Enr |
| MFS patier 267 | DAPK1      | 0.3503 | 0 | 0 | title=Overlapping Enr |
| MFS patier 268 | PLK2       | 0.3503 | 0 | 0 | title=Overlapping Enr |
| MFS patier 269 | EPHB1      | 0.3588 | 0 | 0 | title=Overlapping Enr |
| MFS patier 270 | CSK        | 0.3671 | 0 | 0 | title=Overlapping Enr |
| MFS patier 271 | FGFR1      | 0.3835 | 0 | 0 | title=Overlapping Enr |
| MFS patier 272 | ITK        | 0.3915 | 0 | 0 | title=Overlapping Enr |
| MFS patier 273 | ULK1       | 0.3994 | 0 | 0 | title=Overlapping Enr |
| MFS patier 274 | SLK        | 0.415  | 0 | 0 | title=Overlapping Enr |
| MFS patier 275 | PDGFRBETA  | 0.415  | 0 | 0 | title=Overlapping Enr |
| MFS patier 276 | KIT        | 0.415  | 0 | 0 | title=Overlapping Enr |
| MFS patier 277 | MAP2K2     | 0.4226 | 0 | 0 | title=Overlapping Enr |
| MFS patier 278 | ABL2       | 0.4226 | 0 | 0 | title=Overlapping Enr |
| MFS patier 279 | RIPK1      | 0.4301 | 0 | 0 | title=Overlapping Enr |
| MFS patier 280 | MET        | 0.4375 | 0 | 0 | title=Overlapping Enr |
| MFS patier 281 | PKAALPHA   | 0.4411 | 0 | 0 | title=Overlapping Enr |
| MFS patier 282 | MAP2K6     | 0.4449 | 0 | 0 | title=Overlapping Enr |
| MFS patier 283 | PTK2       | 0.4592 | 0 | 0 | title=Overlapping Enr |
| MFS patier 284 | PRKCG      | 0.4663 | 0 | 0 | title=Overlapping Enr |
| MFS patier 285 | PDPK1      | 0.4663 | 0 | 0 | title=Overlapping Enr |
| MFS patier 286 | PKABETA    | 0.4869 | 0 | 0 | title=Overlapping Enr |
| MFS patier 287 | IGF1R      | 0.5131 | 0 | 0 | title=Overlapping Enr |
| MFS patier 288 | CAMKIIBETA | 0.5131 | 0 | 0 | title=Overlapping Enr |
| MFS patier 289 | MAP3K1     | 0.5863 | 0 | 0 | title=Overlapping Enr |
| MFS patier 290 | TYK2       | 0.6208 | 0 | 0 | title=Overlapping Enr |
| MFS patier 291 | PKCGAMMA   | 0.6208 | 0 | 0 | title=Overlapping Enr |
| MFS patier 292 | LCK        | 0.6447 | 0 | 0 | title=Overlapping Enr |
| MFS patier 293 | PRKCE      | 0.6542 | 0 | 0 | title=Overlapping Enr |
| MFS patier 294 | PKCEPSILON | 0.6587 | 0 | 0 | title=Overlapping Enr |
| MFS patier 295 | MAP3K3     | 0.7049 | 0 | 0 | title=Overlapping Enr |
| MFS patier 296 | RIPK3      | 0.7703 | 0 | 0 | title=Overlapping Enr |

nrichrSubstrates" data-content="HIPK2 targets 25 genes from the input gene list.The full list of substr  
nrichrSubstrates" data-content="CSNK2A1 targets 56 genes from the input gene list.The full list of su  
nrichrSubstrates" data-content="CDK1 targets 58 genes from the input gene list.The full list of substr  
nrichrSubstrates" data-content="MAPK14 targets 45 genes from the input gene list.The full list of sub  
nrichrSubstrates" data-content="CDK4 targets 22 genes from the input gene list.The full list of substr  
nrichrSubstrates" data-content="GSK3B targets 59 genes from the input gene list.The full list of subst  
nrichrSubstrates" data-content="AKT1 targets 25 genes from the input gene list.The full list of substr  
nrichrSubstrates" data-content="PKBALPHA targets 21 genes from the input gene list.The full list of s  
nrichrSubstrates" data-content="CDK2 targets 60 genes from the input gene list.The full list of substr  
nrichrSubstrates" data-content="ERK1 targets 18 genes from the input gene list.The full list of substr  
nrichrSubstrates" data-content="MAPK1 targets 31 genes from the input gene list.The full list of subs  
nrichrSubstrates" data-content="GSK3BETA targets 17 genes from the input gene list.The full list of s  
nrichrSubstrates" data-content="JNK1 targets 13 genes from the input gene list.The full list of substr  
nrichrSubstrates" data-content="ERK2 targets 16 genes from the input gene list.The full list of substr  
nrichrSubstrates" data-content="MAPK3 targets 21 genes from the input gene list.The full list of subs  
nrichrSubstrates" data-content="TGFBR2 targets 11 genes from the input gene list.The full list of sub  
nrichrSubstrates" data-content="ABL1 targets 15 genes from the input gene list.The full list of substr  
nrichrSubstrates" data-content="CK2ALPHA targets 17 genes from the input gene list.The full list of s  
nrichrSubstrates" data-content="PKBBETA targets 9 genes from the input gene list.The full list of sub  
nrichrSubstrates" data-content="ATM targets 17 genes from the input gene list.The full list of substrat  
nrichrSubstrates" data-content="DNAPK targets 12 genes from the input gene list.The full list of subs  
nrichrSubstrates" data-content="GSK3ALPHA targets 9 genes from the input gene list.The full list of s  
nrichrSubstrates" data-content="IKKALPHA targets 7 genes from the input gene list.The full list of sul  
nrichrSubstrates" data-content="CDC2 targets 17 genes from the input gene list.The full list of substr  
nrichrSubstrates" data-content="RPS6KA3 targets 16 genes from the input gene list.The full list of su  
nrichrSubstrates" data-content="RAF1 targets 11 genes from the input gene list.The full list of substr  
nrichrSubstrates" data-content="MAPK8 targets 14 genes from the input gene list.The full list of subs  
nrichrSubstrates" data-content="PKBGAMMA targets 6 genes from the input gene list.The full list of s  
nrichrSubstrates" data-content="GSK targets 6 genes from the input gene list.The full list of substrate  
nrichrSubstrates" data-content="IKKBETA targets 7 genes from the input gene list.The full list of subs  
nrichrSubstrates" data-content="PRKCD targets 11 genes from the input gene list.The full list of subs  
nrichrSubstrates" data-content="CHEK2 targets 7 genes from the input gene list.The full list of substr  
nrichrSubstrates" data-content="MAP3K7 targets 9 genes from the input gene list.The full list of subs  
nrichrSubstrates" data-content="CDK5 targets 12 genes from the input gene list.The full list of substr  
nrichrSubstrates" data-content="PIM1 targets 7 genes from the input gene list.The full list of substrate  
nrichrSubstrates" data-content="PRKCZ targets 8 genes from the input gene list.The full list of substr  
nrichrSubstrates" data-content="AURKA targets 8 genes from the input gene list.The full list of substr  
nrichrSubstrates" data-content="PRKCA targets 28 genes from the input gene list.The full list of subs  
nrichrSubstrates" data-content="TGFBR1 targets 7 genes from the input gene list.The full list of subs  
nrichrSubstrates" data-content="PKR targets 6 genes from the input gene list.The full list of substrate  
nrichrSubstrates" data-content="CHEK1 targets 12 genes from the input gene list.The full list of subst  
nrichrSubstrates" data-content="NLK targets 6 genes from the input gene list.The full list of substrate  
nrichrSubstrates" data-content="CDK8 targets 5 genes from the input gene list.The full list of substrat  
nrichrSubstrates" data-content="MAP2K3 targets 6 genes from the input gene list.The full list of subs  
nrichrSubstrates" data-content="CDK3 targets 5 genes from the input gene list.The full list of substrat

nrichrSubstrates" data-content="JNK2 targets 5 genes from the input gene list.The full list of substrat  
nrichrSubstrates" data-content="IKK targets 3 genes from the input gene list.The full list of substrates  
nrichrSubstrates" data-content="TBK1 targets 7 genes from the input gene list.The full list of substrat  
nrichrSubstrates" data-content="IKBKE targets 7 genes from the input gene list.The full list of substra  
nrichrSubstrates" data-content="CHUK targets 7 genes from the input gene list.The full list of substra  
nrichrSubstrates" data-content="AKT2 targets 6 genes from the input gene list.The full list of substrat  
nrichrSubstrates" data-content="MAPK11 targets 8 genes from the input gene list.The full list of subs  
nrichrSubstrates" data-content="PKCIOTA targets 5 genes from the input gene list.The full list of sub  
nrichrSubstrates" data-content="PDHK1 targets 6 genes from the input gene list.The full list of substr  
nrichrSubstrates" data-content="PRKCB targets 10 genes from the input gene list.The full list of subs  
nrichrSubstrates" data-content="SRC targets 16 genes from the input gene list.The full list of substrat  
nrichrSubstrates" data-content="PRKDC targets 7 genes from the input gene list.The full list of substr  
nrichrSubstrates" data-content="UHMK1 targets 4 genes from the input gene list.The full list of substr  
nrichrSubstrates" data-content="MTOR targets 7 genes from the input gene list.The full list of substra  
nrichrSubstrates" data-content="CSNK1A1 targets 6 genes from the input gene list.The full list of sub  
nrichrSubstrates" data-content="CDK9 targets 4 genes from the input gene list.The full list of substrat  
nrichrSubstrates" data-content="IKBKB targets 6 genes from the input gene list.The full list of substra  
nrichrSubstrates" data-content="CSNK1E targets 5 genes from the input gene list.The full list of subs  
nrichrSubstrates" data-content="CK2A2 targets 5 genes from the input gene list.The full list of substr  
nrichrSubstrates" data-content="PKCALPHA targets 7 genes from the input gene list.The full list of st  
nrichrSubstrates" data-content="DYRK2 targets 4 genes from the input gene list.The full list of substr  
nrichrSubstrates" data-content="CK2 targets 5 genes from the input gene list.The full list of substrate  
nrichrSubstrates" data-content="PRKACA targets 25 genes from the input gene list.The full list of sub  
nrichrSubstrates" data-content="RPS6KB1 targets 5 genes from the input gene list.The full list of sub  
nrichrSubstrates" data-content="RPS6KA5 targets 4 genes from the input gene list.The full list of sub  
nrichrSubstrates" data-content="MAP2K1 targets 5 genes from the input gene list.The full list of subs  
nrichrSubstrates" data-content="PRKAA1 targets 6 genes from the input gene list.The full list of subs  
nrichrSubstrates" data-content="CAM targets 2 genes from the input gene list.The full list of substrate  
nrichrSubstrates" data-content="CDK7 targets 5 genes from the input gene list.The full list of substrat  
nrichrSubstrates" data-content="EGFR targets 8 genes from the input gene list.The full list of substra  
nrichrSubstrates" data-content="RPS6KA1 targets 5 genes from the input gene list.The full list of sub  
nrichrSubstrates" data-content="PBK targets 3 genes from the input gene list.The full list of substrate  
nrichrSubstrates" data-content="GSK3A targets 4 genes from the input gene list.The full list of substr  
nrichrSubstrates" data-content="JAK2 targets 4 genes from the input gene list.The full list of substrat  
nrichrSubstrates" data-content="MOK targets 3 genes from the input gene list.The full list of substrate  
nrichrSubstrates" data-content="CK1ALPHA targets 5 genes from the input gene list.The full list of su  
nrichrSubstrates" data-content="MELK targets 3 genes from the input gene list.The full list of substrat  
nrichrSubstrates" data-content="DNA targets 2 genes from the input gene list.The full list of substrate  
nrichrSubstrates" data-content="MAPK10 targets 4 genes from the input gene list.The full list of subs  
nrichrSubstrates" data-content="CAMK2A targets 6 genes from the input gene list.The full list of subs  
nrichrSubstrates" data-content="TNK2 targets 3 genes from the input gene list.The full list of substrat  
nrichrSubstrates" data-content="MAPK9 targets 5 genes from the input gene list.The full list of substr  
nrichrSubstrates" data-content="CDK6 targets 3 genes from the input gene list.The full list of substrat  
nrichrSubstrates" data-content="CAMK4 targets 3 genes from the input gene list.The full list of substr  
nrichrSubstrates" data-content="CAMK2D targets 3 genes from the input gene list.The full list of subs  
nrichrSubstrates" data-content="PKD1 targets 4 genes from the input gene list.The full list of substrat  
nrichrSubstrates" data-content="CAMKIV targets 2 genes from the input gene list.The full list of subst



nrchrSubstrates" data-content="PKG1CGKI targets 2 genes from the input gene list.The full list of su  
nrchrSubstrates" data-content="CHK2 targets 1 genes from the input gene list.The full list of substrat  
nrchrSubstrates" data-content="PDHK2 targets 1 genes from the input gene list.The full list of substr  
nrchrSubstrates" data-content="NIK targets 1 genes from the input gene list.The full list of substrates  
nrchrSubstrates" data-content="RSK targets 1 genes from the input gene list.The full list of substrate  
nrchrSubstrates" data-content="RSK3 targets 1 genes from the input gene list.The full list of substrat  
nrchrSubstrates" data-content="PLK3 targets 2 genes from the input gene list.The full list of substrat  
nrchrSubstrates" data-content="MAP2K2 targets 2 genes from the input gene list.The full list of subs  
nrchrSubstrates" data-content="DYRK1A targets 2 genes from the input gene list.The full list of subs  
nrchrSubstrates" data-content="CSNK2A2 targets 4 genes from the input gene list.The full list of sub  
nrchrSubstrates" data-content="MAP2K6 targets 2 genes from the input gene list.The full list of subs  
nrchrSubstrates" data-content="TRRAP targets 1 genes from the input gene list.The full list of substr  
nrchrSubstrates" data-content="CK1GAMMA1 targets 1 genes from the input gene list.The full list of  
nrchrSubstrates" data-content="CSNK1D targets 2 genes from the input gene list.The full list of subs  
nrchrSubstrates" data-content="PRKCG targets 2 genes from the input gene list.The full list of substi  
nrchrSubstrates" data-content="PKC targets 1 genes from the input gene list.The full list of substrate  
nrchrSubstrates" data-content="CK1 targets 1 genes from the input gene list.The full list of substrate  
nrchrSubstrates" data-content="JNK3 targets 1 genes from the input gene list.The full list of substrat  
nrchrSubstrates" data-content="MAP2K4 targets 2 genes from the input gene list.The full list of subs  
nrchrSubstrates" data-content="PDGFRALPHA targets 1 genes from the input gene list.The full list o  
nrchrSubstrates" data-content="TTK targets 3 genes from the input gene list.The full list of substrate  
nrchrSubstrates" data-content="CK1DELTA targets 2 genes from the input gene list.The full list of su  
nrchrSubstrates" data-content="CAMKIIBETA targets 2 genes from the input gene list.The full list of :  
nrchrSubstrates" data-content="P70S6K targets 1 genes from the input gene list.The full list of subst  
nrchrSubstrates" data-content="ABL targets 2 genes from the input gene list.The full list of substrate  
nrchrSubstrates" data-content="ERBB3 targets 2 genes from the input gene list.The full list of substr  
nrchrSubstrates" data-content="RIPK3 targets 3 genes from the input gene list.The full list of substr  
nrchrSubstrates" data-content="PKC targets 1 genes from the input gene list.The full list of substrate  
nrchrSubstrates" data-content="CAMKIIALPHA targets 2 genes from the input gene list.The full list o  
nrchrSubstrates" data-content="TAF1 targets 1 genes from the input gene list.The full list of substrat  
nrchrSubstrates" data-content="MAP3K8 targets 2 genes from the input gene list.The full list of subs  
nrchrSubstrates" data-content="TAOK1 targets 1 genes from the input gene list.The full list of substr  
nrchrSubstrates" data-content="MAST1 targets 1 genes from the input gene list.The full list of substr  
nrchrSubstrates" data-content="POMK targets 1 genes from the input gene list.The full list of substr  
nrchrSubstrates" data-content="PRKCC targets 2 genes from the input gene list.The full list of substi  
nrchrSubstrates" data-content="PRKG1 targets 2 genes from the input gene list.The full list of substr  
nrchrSubstrates" data-content="BTK targets 2 genes from the input gene list.The full list of substrate  
nrchrSubstrates" data-content="PDK targets 1 genes from the input gene list.The full list of substrate  
nrchrSubstrates" data-content="ROR1 targets 1 genes from the input gene list.The full list of substr  
nrchrSubstrates" data-content="LRRK1 targets 1 genes from the input gene list.The full list of substr  
nrchrSubstrates" data-content="ULK4 targets 1 genes from the input gene list.The full list of substrat  
nrchrSubstrates" data-content="MINK1 targets 1 genes from the input gene list.The full list of substr  
nrchrSubstrates" data-content="STK40 targets 1 genes from the input gene list.The full list of substr  
nrchrSubstrates" data-content="MAP4K5 targets 1 genes from the input gene list.The full list of subs  
nrchrSubstrates" data-content="PKDCC targets 1 genes from the input gene list.The full list of substr  
nrchrSubstrates" data-content="MAST4 targets 1 genes from the input gene list.The full list of substr  
nrchrSubstrates" data-content="TYRO3 targets 1 genes from the input gene list.The full list of substr

nrichrSubstrates" data-content="DMPK targets 1 genes from the input gene list.The full list of substr  
nrichrSubstrates" data-content="PKMYT1 targets 1 genes from the input gene list.The full list of subs  
nrichrSubstrates" data-content="PRKX targets 1 genes from the input gene list.The full list of substr  
nrichrSubstrates" data-content="LMTK2 targets 1 genes from the input gene list.The full list of substr  
nrichrSubstrates" data-content="MARK4 targets 1 genes from the input gene list.The full list of substr  
nrichrSubstrates" data-content="MAP3K14 targets 3 genes from the input gene list.The full list of sub  
nrichrSubstrates" data-content="PRKD3 targets 1 genes from the input gene list.The full list of substr  
nrichrSubstrates" data-content="FASTK targets 1 genes from the input gene list.The full list of substr  
nrichrSubstrates" data-content="PIM3 targets 1 genes from the input gene list.The full list of substrate  
nrichrSubstrates" data-content="TRIB3 targets 1 genes from the input gene list.The full list of substr  
nrichrSubstrates" data-content="GSG2 targets 1 genes from the input gene list.The full list of substr  
nrichrSubstrates" data-content="SGK2 targets 1 genes from the input gene list.The full list of substrat  
nrichrSubstrates" data-content="PNCK targets 1 genes from the input gene list.The full list of substr  
nrichrSubstrates" data-content="MAPK15 targets 1 genes from the input gene list.The full list of subs  
nrichrSubstrates" data-content="TYK2 targets 2 genes from the input gene list.The full list of substrat  
nrichrSubstrates" data-content="HIPK1 targets 1 genes from the input gene list.The full list of substr  
nrichrSubstrates" data-content="NEK9 targets 1 genes from the input gene list.The full list of substrat  
nrichrSubstrates" data-content="STK26 targets 1 genes from the input gene list.The full list of substr  
nrichrSubstrates" data-content="TLK1 targets 1 genes from the input gene list.The full list of substrat  
nrichrSubstrates" data-content="SIK1 targets 1 genes from the input gene list.The full list of substrate  
nrichrSubstrates" data-content="CAMKK2 targets 1 genes from the input gene list.The full list of subs  
nrichrSubstrates" data-content="MAP4K4 targets 1 genes from the input gene list.The full list of subs  
nrichrSubstrates" data-content="WEE1 targets 1 genes from the input gene list.The full list of substr  
nrichrSubstrates" data-content="MAPK13 targets 2 genes from the input gene list.The full list of subs  
nrichrSubstrates" data-content="CDK16 targets 1 genes from the input gene list.The full list of substr  
nrichrSubstrates" data-content="CSNK1G2 targets 1 genes from the input gene list.The full list of suc  
nrichrSubstrates" data-content="CSNK1G1 targets 1 genes from the input gene list.The full list of suc  
nrichrSubstrates" data-content="MAP3K11 targets 1 genes from the input gene list.The full list of sub  
nrichrSubstrates" data-content="TTN targets 1 genes from the input gene list.The full list of substrate  
nrichrSubstrates" data-content="DYRK3 targets 1 genes from the input gene list.The full list of substr  
nrichrSubstrates" data-content="AURKC targets 1 genes from the input gene list.The full list of substr  
nrichrSubstrates" data-content="NUAK1 targets 1 genes from the input gene list.The full list of substr  
nrichrSubstrates" data-content="CAMKK1 targets 1 genes from the input gene list.The full list of subs  
nrichrSubstrates" data-content="GRK5 targets 1 genes from the input gene list.The full list of substr  
nrichrSubstrates" data-content="MKNK2 targets 1 genes from the input gene list.The full list of substr  
nrichrSubstrates" data-content="INSR targets 2 genes from the input gene list.The full list of substrat  
nrichrSubstrates" data-content="NEK1 targets 1 genes from the input gene list.The full list of substrat  
nrichrSubstrates" data-content="EPHB3 targets 1 genes from the input gene list.The full list of substr  
nrichrSubstrates" data-content="PRKCE targets 2 genes from the input gene list.The full list of substr  
nrichrSubstrates" data-content="RPS6KA2 targets 1 genes from the input gene list.The full list of sub  
nrichrSubstrates" data-content="MOS targets 1 genes from the input gene list.The full list of substrate  
nrichrSubstrates" data-content="CK1EPSILON targets 1 genes from the input gene list.The full list of  
nrichrSubstrates" data-content="CLK2 targets 1 genes from the input gene list.The full list of substrat  
nrichrSubstrates" data-content="RPS6KB2 targets 1 genes from the input gene list.The full list of sub  
nrichrSubstrates" data-content="PLK1 targets 5 genes from the input gene list.The full list of substrat  
nrichrSubstrates" data-content="AKT3 targets 1 genes from the input gene list.The full list of substrat  
nrichrSubstrates" data-content="SGK3 targets 1 genes from the input gene list.The full list of substrat





nrichrSubstrates" data-content="CSNK2A1 targets 50 genes from the input gene list.The full list of su  
nrichrSubstrates" data-content="MAPK1 targets 35 genes from the input gene list.The full list of subs  
nrichrSubstrates" data-content="MAPK3 targets 27 genes from the input gene list.The full list of subs  
nrichrSubstrates" data-content="HIPK2 targets 20 genes from the input gene list.The full list of substr  
nrichrSubstrates" data-content="ERK1 targets 21 genes from the input gene list.The full list of substr  
nrichrSubstrates" data-content="MAPK14 targets 36 genes from the input gene list.The full list of sub  
nrichrSubstrates" data-content="CDK1 targets 46 genes from the input gene list.The full list of substr  
nrichrSubstrates" data-content="AKT1 targets 23 genes from the input gene list.The full list of substr  
nrichrSubstrates" data-content="CK2ALPHA targets 20 genes from the input gene list.The full list of s  
nrichrSubstrates" data-content="MAPK8 targets 19 genes from the input gene list.The full list of subs  
nrichrSubstrates" data-content="ERK2 targets 16 genes from the input gene list.The full list of substr  
nrichrSubstrates" data-content="CDK4 targets 15 genes from the input gene list.The full list of substr  
nrichrSubstrates" data-content="GSK3B targets 47 genes from the input gene list.The full list of subs  
nrichrSubstrates" data-content="JNK1 targets 12 genes from the input gene list.The full list of substr  
nrichrSubstrates" data-content="PRKCD targets 14 genes from the input gene list.The full list of subs  
nrichrSubstrates" data-content="CDC2 targets 17 genes from the input gene list.The full list of substr  
nrichrSubstrates" data-content="PKBALPHA targets 15 genes from the input gene list.The full list of s  
nrichrSubstrates" data-content="DNAPK targets 11 genes from the input gene list.The full list of subs  
nrichrSubstrates" data-content="CK2 targets 9 genes from the input gene list.The full list of substrate  
nrichrSubstrates" data-content="GSK3BETA targets 12 genes from the input gene list.The full list of s  
nrichrSubstrates" data-content="CDK2 targets 45 genes from the input gene list.The full list of substr  
richrSubstrates" data-content="ABL1 targets 12 genes from the input gene list.The full list of substrates is avail  
richrSubstrates" data-content="IKKBETA targets 7 genes from the input gene list.The full list of substrates is av  
richrSubstrates" data-content="JNK2 targets 6 genes from the input gene list.The full list of substrates is availa  
richrSubstrates" data-content="RAF1 targets 10 genes from the input gene list.The full list of substrates is avail  
richrSubstrates" data-content="PRKCB targets 12 genes from the input gene list.The full list of substrates is av  
richrSubstrates" data-content="RPS6KA3 targets 14 genes from the input gene list.The full list of substrates is a  
richrSubstrates" data-content="SRC targets 18 genes from the input gene list.The full list of substrates is availa  
richrSubstrates" data-content="PKD1 targets 7 genes from the input gene list.The full list of substrates is availa  
richrSubstrates" data-content="PRKACA targets 28 genes from the input gene list.The full list of substrates is a  
richrSubstrates" data-content="MAP2K4 targets 6 genes from the input gene list.The full list of substrates is av  
richrSubstrates" data-content="TBK1 targets 7 genes from the input gene list.The full list of substrates is availa  
richrSubstrates" data-content="RPS6KA1 targets 7 genes from the input gene list.The full list of substrates is av  
richrSubstrates" data-content="CDK5 targets 10 genes from the input gene list.The full list of substrates is avail  
richrSubstrates" data-content="MAPK9 targets 7 genes from the input gene list.The full list of substrates is av  
richrSubstrates" data-content="PRKCA targets 24 genes from the input gene list.The full list of substrates is av  
richrSubstrates" data-content="ATM targets 11 genes from the input gene list.The full list of substrates is avail  
richrSubstrates" data-content="CHEK1 targets 10 genes from the input gene list.The full list of substrates is av  
richrSubstrates" data-content="CHEK2 targets 5 genes from the input gene list.The full list of substrates is avail  
richrSubstrates" data-content="PRKDC targets 7 genes from the input gene list.The full list of substrates is av  
richrSubstrates" data-content="GSK3ALPHA targets 5 genes from the input gene list.The full list of substrates is  
richrSubstrates" data-content="GSK targets 4 genes from the input gene list.The full list of substrates is availab  
richrSubstrates" data-content="AURORAA targets 6 genes from the input gene list.The full list of substrates is a  
richrSubstrates" data-content="PIM1 targets 5 genes from the input gene list.The full list of substrates is availa  
richrSubstrates" data-content="CDK6 targets 4 genes from the input gene list.The full list of substrates is availa  
richrSubstrates" data-content="MAPK7 targets 4 genes from the input gene list.The full list of substrates is av  
richrSubstrates" data-content="PRKCZ targets 6 genes from the input gene list.The full list of substrates is avail











chrSubstrates" data-content="FGFR1 targets 1 genes from the input gene list.The full list of substrates is avail  
chrSubstrates" data-content="ITK targets 1 genes from the input gene list.The full list of substrates is availabl  
chrSubstrates" data-content="ARAF targets 1 genes from the input gene list.The full list of substrates is availa  
chrSubstrates" data-content="ULK1 targets 1 genes from the input gene list.The full list of substrates is availa  
chrSubstrates" data-content="HCK targets 1 genes from the input gene list.The full list of substrates is availab  
chrSubstrates" data-content="MAP2K2 targets 1 genes from the input gene list.The full list of substrates is av  
chrSubstrates" data-content="ABL2 targets 1 genes from the input gene list.The full list of substrates is availa  
chrSubstrates" data-content="MET targets 1 genes from the input gene list.The full list of substrates is availa  
chrSubstrates" data-content="NLK targets 1 genes from the input gene list.The full list of substrates is availab  
chrSubstrates" data-content="PTK2 targets 1 genes from the input gene list.The full list of substrates is availa  
chrSubstrates" data-content="PRKCG targets 1 genes from the input gene list.The full list of substrates is avai  
chrSubstrates" data-content="NEK2 targets 1 genes from the input gene list.The full list of substrates is availa  
chrSubstrates" data-content="PDPK1 targets 1 genes from the input gene list.The full list of substrates is avai  
chrSubstrates" data-content="KDR targets 1 genes from the input gene list.The full list of substrates is availab  
chrSubstrates" data-content="PKABETA targets 1 genes from the input gene list.The full list of substrates is an  
chrSubstrates" data-content="PLK4 targets 1 genes from the input gene list.The full list of substrates is availa  
chrSubstrates" data-content="SGK1 targets 1 genes from the input gene list.The full list of substrates is availa  
chrSubstrates" data-content="PRKCC targets 1 genes from the input gene list.The full list of substrates is avai  
chrSubstrates" data-content="PRKCE targets 1 genes from the input gene list.The full list of substrates is avail  
chrSubstrates" data-content="CSNK2A1 targets 49 genes from the input gene list.The full list of substrates is ;  
chrSubstrates" data-content="MAPK1 targets 35 genes from the input gene list.The full list of substrates is av  
chrSubstrates" data-content="MAPK14 targets 39 genes from the input gene list.The full list of substrates is a  
chrSubstrates" data-content="MAPK3 targets 26 genes from the input gene list.The full list of substrates is av  
chrSubstrates" data-content="HIPK2 targets 18 genes from the input gene list.The full list of substrates is ava  
chrSubstrates" data-content="ERK1 targets 19 genes from the input gene list.The full list of substrates is avail  
chrSubstrates" data-content="CDK1 targets 45 genes from the input gene list.The full list of substrates is avai  
chrSubstrates" data-content="CK2ALPHA targets 21 genes from the input gene list.The full list of substrates is ;  
chrSubstrates" data-content="CDK4 targets 17 genes from the input gene list.The full list of substrates is avai  
chrSubstrates" data-content="AKT1 targets 23 genes from the input gene list.The full list of substrates is avail  
chrSubstrates" data-content="GSK3B targets 47 genes from the input gene list.The full list of substrates is ava  
chrSubstrates" data-content="ERK2 targets 15 genes from the input gene list.The full list of substrates is avail  
chrSubstrates" data-content="GSK3BETA targets 14 genes from the input gene list.The full list of substrates is  
chrSubstrates" data-content="JNK1 targets 11 genes from the input gene list.The full list of substrates is avail  
chrSubstrates" data-content="MAPK8 targets 16 genes from the input gene list.The full list of substrates is av  
chrSubstrates" data-content="CDK2 targets 46 genes from the input gene list.The full list of substrates is avai  
chrSubstrates" data-content="CK2 targets 9 genes from the input gene list.The full list of substrates is availab  
chrSubstrates" data-content="PKBALPHA targets 14 genes from the input gene list.The full list of substrates is ;  
chrSubstrates" data-content="PRKCA targets 28 genes from the input gene list.The full list of substrates is ava  
chrSubstrates" data-content="CDC2 targets 15 genes from the input gene list.The full list of substrates is avai  
chrSubstrates" data-content="RPS6KA3 targets 14 genes from the input gene list.The full list of substrates is ;  
chrSubstrates" data-content="PRKACA targets 27 genes from the input gene list.The full list of substrates is a  
chrSubstrates" data-content="IKKBETA targets 6 genes from the input gene list.The full list of substrates is av  
chrSubstrates" data-content="GSK3ALPHA targets 6 genes from the input gene list.The full list of substrates is ;  
chrSubstrates" data-content="TBK1 targets 7 genes from the input gene list.The full list of substrates is availa  
chrSubstrates" data-content="PRKCD targets 9 genes from the input gene list.The full list of substrates is avai  
chrSubstrates" data-content="IKBKE targets 7 genes from the input gene list.The full list of substrates is avail;  
chrSubstrates" data-content="AURORAA targets 7 genes from the input gene list.The full list of substrates is a















chrSubstrates" data-content="AURORAA targets 8 genes from the input gene list.The full list of substrates is a  
chrSubstrates" data-content="CSNK2A2 targets 10 genes from the input gene list.The full list of substrates is ;  
chrSubstrates" data-content="CSNK1E targets 7 genes from the input gene list.The full list of substrates is ava  
chrSubstrates" data-content="PRKCD targets 10 genes from the input gene list.The full list of substrates is ava  
chrSubstrates" data-content="CHEK1 targets 12 genes from the input gene list.The full list of substrates is ava  
chrSubstrates" data-content="CDK5 targets 11 genes from the input gene list.The full list of substrates is avai  
chrSubstrates" data-content="MELK targets 5 genes from the input gene list.The full list of substrates is availa  
chrSubstrates" data-content="PRKCA targets 27 genes from the input gene list.The full list of substrates is ava  
chrSubstrates" data-content="PKBBETA targets 6 genes from the input gene list.The full list of substrates is av  
chrSubstrates" data-content="PKBGAMMA targets 5 genes from the input gene list.The full list of substrates i  
chrSubstrates" data-content="CDK6 targets 5 genes from the input gene list.The full list of substrates is availa  
chrSubstrates" data-content="CHEK2 targets 6 genes from the input gene list.The full list of substrates is avail  
chrSubstrates" data-content="JNK2 targets 5 genes from the input gene list.The full list of substrates is availa  
chrSubstrates" data-content="PIM1 targets 6 genes from the input gene list.The full list of substrates is availa  
chrSubstrates" data-content="PRKAA1 targets 8 genes from the input gene list.The full list of substrates is ava  
chrSubstrates" data-content="RPS6KA1 targets 7 genes from the input gene list.The full list of substrates is av  
chrSubstrates" data-content="PRK CZ targets 7 genes from the input gene list.The full list of substrates is avail  
chrSubstrates" data-content="SRC targets 17 genes from the input gene list.The full list of substrates is availa  
chrSubstrates" data-content="PRKACA targets 28 genes from the input gene list.The full list of substrates is a  
chrSubstrates" data-content="PKR targets 5 genes from the input gene list.The full list of substrates is availab  
chrSubstrates" data-content="PLK1 targets 12 genes from the input gene list.The full list of substrates is avail  
chrSubstrates" data-content="GSK targets 4 genes from the input gene list.The full list of substrates is availab  
chrSubstrates" data-content="PRKDC targets 7 genes from the input gene list.The full list of substrates is avai  
chrSubstrates" data-content="TBK1 targets 6 genes from the input gene list.The full list of substrates is availa  
chrSubstrates" data-content="IKBKE targets 6 genes from the input gene list.The full list of substrates is availa  
chrSubstrates" data-content="CHUK targets 6 genes from the input gene list.The full list of substrates is availa  
chrSubstrates" data-content="CK1ALPHA targets 6 genes from the input gene list.The full list of substrates is ;  
chrSubstrates" data-content="ATR targets 7 genes from the input gene list.The full list of substrates is availab  
chrSubstrates" data-content="CDK9 targets 4 genes from the input gene list.The full list of substrates is availa  
chrSubstrates" data-content="PKD1 targets 5 genes from the input gene list.The full list of substrates is availa  
chrSubstrates" data-content="CK2A2 targets 5 genes from the input gene list.The full list of substrates is avail  
chrSubstrates" data-content="RET targets 4 genes from the input gene list.The full list of substrates is availab  
chrSubstrates" data-content="RAF1 targets 7 genes from the input gene list.The full list of substrates is availa  
chrSubstrates" data-content="PLK3 targets 4 genes from the input gene list.The full list of substrates is availa  
chrSubstrates" data-content="DYRK2 targets 4 genes from the input gene list.The full list of substrates is avai  
chrSubstrates" data-content="DYRK1A targets 4 genes from the input gene list.The full list of substrates is ava  
chrSubstrates" data-content="PDHK1 targets 5 genes from the input gene list.The full list of substrates is avai  
chrSubstrates" data-content="IKK targets 2 genes from the input gene list.The full list of substrates is availabl  
chrSubstrates" data-content="NLK targets 4 genes from the input gene list.The full list of substrates is availab  
chrSubstrates" data-content="CDK7 targets 5 genes from the input gene list.The full list of substrates is availa  
chrSubstrates" data-content="HIPK1 targets 3 genes from the input gene list.The full list of substrates is avail  
chrSubstrates" data-content="AURORAB targets 5 genes from the input gene list.The full list of substrates is a  
chrSubstrates" data-content="NIK targets 2 genes from the input gene list.The full list of substrates is availabl  
chrSubstrates" data-content="MAP2K3 targets 4 genes from the input gene list.The full list of substrates is av  
chrSubstrates" data-content="MAP2K4 targets 4 genes from the input gene list.The full list of substrates is av  
chrSubstrates" data-content="AURKA targets 5 genes from the input gene list.The full list of substrates is avai  
chrSubstrates" data-content="CK1DELTA targets 4 genes from the input gene list.The full list of substrates is a

ichrSubstrates" data-content="DNA targets 2 genes from the input gene list.The full list of substrates is availa

ichrSubstrates" data-content="CDC7 targets 3 genes from the input gene list.The full list of substrates is availa

ichrSubstrates" data-content="CDK8 targets 3 genes from the input gene list.The full list of substrates is availa

ichrSubstrates" data-content="IKBKB targets 5 genes from the input gene list.The full list of substrates is availa

ichrSubstrates" data-content="MAPK9 targets 5 genes from the input gene list.The full list of substrates is ava

ichrSubstrates" data-content="UHMK1 targets 3 genes from the input gene list.The full list of substrates is ava

ichrSubstrates" data-content="MAPK7 targets 3 genes from the input gene list.The full list of substrates is ava

ichrSubstrates" data-content="CK1GAMMA1 targets 2 genes from the input gene list.The full list of substrates

ichrSubstrates" data-content="PKCALPHA targets 6 genes from the input gene list.The full list of substrates is ;

ichrSubstrates" data-content="CDK3 targets 3 genes from the input gene list.The full list of substrates is availa

ichrSubstrates" data-content="EIF2AK2 targets 3 genes from the input gene list.The full list of substrates is ava

ichrSubstrates" data-content="BMPR1B targets 3 genes from the input gene list.The full list of substrates is av

ichrSubstrates" data-content="JNK3 targets 2 genes from the input gene list.The full list of substrates is availa

ichrSubstrates" data-content="SGK1 targets 4 genes from the input gene list.The full list of substrates is availa

ichrSubstrates" data-content="MAP3K5 targets 3 genes from the input gene list.The full list of substrates is av

ichrSubstrates" data-content="PKG1CGKI targets 3 genes from the input gene list.The full list of substrates is a

ichrSubstrates" data-content="ALK targets 3 genes from the input gene list.The full list of substrates is availab

ichrSubstrates" data-content="ERBB2 targets 5 genes from the input gene list.The full list of substrates is avail

ichrSubstrates" data-content="AURKB targets 6 genes from the input gene list.The full list of substrates is avai

ichrSubstrates" data-content="MTOR targets 5 genes from the input gene list.The full list of substrates is avail

ichrSubstrates" data-content="ACTR2B targets 2 genes from the input gene list.The full list of substrates is ava

ichrSubstrates" data-content="STK11 targets 3 genes from the input gene list.The full list of substrates is avail

ichrSubstrates" data-content="PRKAA2 targets 3 genes from the input gene list.The full list of substrates is ava

ichrSubstrates" data-content="RPS6KA5 targets 3 genes from the input gene list.The full list of substrates is av

ichrSubstrates" data-content="INSR targets 4 genes from the input gene list.The full list of substrates is availa

ichrSubstrates" data-content="PKCIOTA targets 3 genes from the input gene list.The full list of substrates is av

ichrSubstrates" data-content="PKC targets 4 genes from the input gene list.The full list of substrates is availab

ichrSubstrates" data-content="MAPK11 targets 5 genes from the input gene list.The full list of substrates is av

ichrSubstrates" data-content="CSNK1D targets 3 genes from the input gene list.The full list of substrates is ava

ichrSubstrates" data-content="FOXO3 targets 1 genes from the input gene list.The full list of substrates is avai

ichrSubstrates" data-content="TRIM33 targets 1 genes from the input gene list.The full list of substrates is ava

ichrSubstrates" data-content="LYK5 targets 1 genes from the input gene list.The full list of substrates is availa

ichrSubstrates" data-content="PIKFYVE targets 1 genes from the input gene list.The full list of substrates is ava

ichrSubstrates" data-content="MAP3K14 targets 5 genes from the input gene list.The full list of substrates is a

ichrSubstrates" data-content="ACVR2B targets 2 genes from the input gene list.The full list of substrates is ava

ichrSubstrates" data-content="GSK3A targets 3 genes from the input gene list.The full list of substrates is avai

ichrSubstrates" data-content="PKMYT1 targets 2 genes from the input gene list.The full list of substrates is av

ichrSubstrates" data-content="PKA targets 2 genes from the input gene list.The full list of substrates is availab

ichrSubstrates" data-content="MAPK15 targets 2 genes from the input gene list.The full list of substrates is av

ichrSubstrates" data-content="AMPKA2 targets 2 genes from the input gene list.The full list of substrates is av

ichrSubstrates" data-content="SIK1 targets 2 genes from the input gene list.The full list of substrates is availa

ichrSubstrates" data-content="MAP4K4 targets 2 genes from the input gene list.The full list of substrates is av

ichrSubstrates" data-content="MERTK targets 2 genes from the input gene list.The full list of substrates is avai

ichrSubstrates" data-content="EGFR targets 6 genes from the input gene list.The full list of substrates is availa

ichrSubstrates" data-content="NUAK1 targets 2 genes from the input gene list.The full list of substrates is avai

ichrSubstrates" data-content="GRK5 targets 2 genes from the input gene list.The full list of substrates is availa

ichrSubstrates" data-content="EPHA8 targets 2 genes from the input gene list.The full list of substrates is avai











ates is available below:TRIM28 MYC TP63 AR HIF1A SMAD2 SMAD1 SMAD3 CAV1 SIAH2 NFKB1  
bstrates is available below:EHMT2 AKT1 DAXX AR PPARGC1A JUN EZH2 SIRT1 STAT3 YY1 SQS  
ates is available below:EHMT2 AR PPARGC1A JUN EZH2 SIRT1 STAT3 SQSTM1 FOXO1 NFKB1 S  
strates is available below:EHMT2 AKT1 AR PPARGC1A JUN EZH2 STAT3 YY1 SQSTM1 FOXO1 S  
ates is available below:RB1 MYC SKP2 WDR77 FOXO1 SMAD2 JUN SMAD3 ESR1 SP1 MDM4 CDI  
trates is available below:JUN SP1 UHRF1 E2F1 TRIM24 TP63 SMARCC1 SMARCA4 RELA CAV1 W  
ates is available below:MYC AKT1 AR HIST1H3A PPARGC1A JUN EZH2 CDKN1A NCOR1 CDKN2A  
substrates is available below:MYC AKT1 SKP2 SMARCC1 AR PPARGC1A EZH2 CDKN1A NCOR2 F  
ates is available below:JUN DDB2 SP1 UHRF1 E2F1 E2F4 TRIM28 TP63 SMARCC1 SMARCA4 CA  
ates is available below:KAT5 MYC AR SQSTM1 HIF1A SMAD2 SMAD1 JUN SMAD4 SMAD3 ESR1 N  
trates is available below:RB1 MYC AKT1 AR HIF1A JUN EZH2 CDKN1A TGFB1I1 NCOR2 CDKN2A  
substrates is available below:MYC AKT1 AR FOXO1 PPARGC1A SMAD1 JUN SMAD3 ESR1 NFKB1  
ates is available below:CDKN1A HNF4A MYC SIRT1 HIF1A RELA E2F1 SMAD2 JUN SMAD3 STAT3  
ates is available below:RB1 MYC AR SMAD2 SMAD1 JUN SMAD4 SMAD3 ESR1 NFKB1 SP1 NCOF  
trates is available below:MYC AKT1 AR JUN CDKN1A STAT3 FBXW7 FOXO1 SMAD2 SMAD4 SMA  
strates is available below:TGFB1I1 MYC HSP90AA1 SMAD2 SMAD3 CAV1 WWP1 NFKB1 PML PPI  
ates is available below:RB1 KAT5 MYC TP63 DDX5 JUN CAV1 ESR1 SNW1 MDM4 CDKN1A MYOD  
substrates is available below:RB1 MYC AKT1 JUN SMARCA4 NCOR2 RELA YY1 SP1 SUMO1 SIN3,  
strates is available below:GSK3B CDKN1A FOXO4 FOXO1 RELA AKT1 CHUK ESR1 NFKB1" style=  
tes is available below:RB1 KAT5 TRIM28 TP63 DAXX HIF1A SMARCA4 EZH2 PARP1 FBXW7 SMA  
trates is available below:KAT5 TRIM28 AKT1 SMAD2 JUN SMAD4 ESR1 SP1 HSP90AA1 CHUK PA  
substrates is available below:GSK3B HNF4A MYC AKT1 PARP1 FOXO1 JUN ESR1 NFKB1" style="c  
bstrates is available below:HSP90AA1 CHUK NFKB1 RELA NCOR2 IRF7 AKT1" style="cursor: point  
ates is available below:RB1 KAT5 TRIM28 MYC SKP2 AR JUN EZH2 CDKN1A PARP1 NCOR1 REL  
bstrates is available below:MYC AR HIST1H3A JUN CDKN1A TCF20 HNF4A NCOR2 KAT2B CDKN  
ates is available below:RB1 MYC AKT1 AR ESR1 NFKB1 PIN1 PRKG1 HSP90AA1 PARP1 MAPK1" :  
trates is available below:MYC AR JUN CDKN1A SIRT1 SUZ12 CDKN2A STAT3 FOXO4 SP1 NFE2L  
substrates is available below:GSK3B CDKN1A FOXO1 RELA CHUK NFKB1" style="cursor: pointer; te  
s is available below:CDKN1A CEBPB RELA MYC ESR1 NFKB1" style="cursor: pointer; text-decorati  
strates is available below:RELA AKT1 CHUK STAT3 NFKB1 IRF7 SQSTM1" style="cursor: pointer; te  
trates is available below:TRIM28 SQSTM1 HIST1H3A JUN CAV1 NFE2L2 GSK3B CDKN1A HDAC5  
ates is available below:RB1 TRIM28 E2F1 VHL SIAH2 PML MDM4" style="cursor: pointer; text-decor  
trates is available below:SQSTM1 DDX5 SMAD3 SMURF1 HSP90AA1 HDAC4 HDAC5 E2F1 E2F4" :  
ates is available below:RB1 MYC AR HIF1A FOXO1 NFE2L2 GSK3B CDKN1A HDAC5 STAT3 PPP1  
es is available below:CDKN1A MYC SKP2 AR UHRF1 RELA HIST1H3A" style="cursor: pointer; text-c  
ates is available below:GSK3B AKT1 PIAS4 RELA MAPK1 STAT3 SP1 PIN1" style="cursor: pointer;  
ates is available below:GSK3B CDKN1A AR HIST1H3A VHL ESR1 SKI PIN1" style="cursor: pointer;  
trates is available below:AKT1 AR JUN STAT3 FBXW7 SQSTM1 NFKB1 NFE2L2 STUB1 HNF4A RE  
trates is available below:TP63 IRF7 OTUB1 SMAD2 WWOX SMURF1 PPP1CA" style="cursor: point  
s is available below:HSP90AA1 CHUK STAT3 NFKB1 PPP1CA IRF7" style="cursor: pointer; text-dec  
trates is available below:RB1 TRIM28 MYC SKP2 HIST1H3A EZH2 CDKN1A NFKB1 MDM4 SIN3A E  
s is available below:FOXO1 HNF4A SMAD4 SETDB1 FBXW7 STAT3" style="cursor: pointer; text-dec  
tes is available below:HIST1H3A E2F1 SMAD1 SMAD3 STAT3" style="cursor: pointer; text-decoration  
trates is available below:TRAF6 SMAD2 SMAD1 SMAD4 SMAD3 SMURF1" style="cursor: pointer; te  
tes is available below:RB1 CDKN1A E2F1 JUN ESR1" style="cursor: pointer; text-decoration: underlir

es is available below:RB1 RELA MYC SMAD2 JUN" style="cursor: pointer; text-decoration: underline  
; is available below:NCOR2 NFKB1 RELA" style="cursor: pointer; text-decoration: underline dotted;">  
es is available below:AKT1 IRF7 SQSTM1 RELA E2F1 STAT3 ESR1" style="cursor: pointer; text-dec  
ites is available below:AKT1 BTRC IRF1 IRF7 RELA ESR1 NFKB1" style="cursor: pointer; text-decor  
tes is available below:MYC BTRC NCOR2 NCOR1 RELA ESR1 NFKB1" style="cursor: pointer; text-c  
es is available below:GSK3B CHUK FOXO4 HIST1H3A PPARGC1A ESR1" style="cursor: pointer; te  
trates is available below:PPARGC1A JUN ESR1 NFKB1 HNF4A CEBPB E2F1 PML" style="cursor: p  
strates is available below:RELA HSP90AA1 CHUK NFKB1 SQSTM1" style="cursor: pointer; text-decc  
ates is available below:GSK3B AKT1 PRKG1 HSP90AA1 CHUK FOXO1" style="cursor: pointer; text-  
trates is available below:AKT1 AR HIST1H3A JUN CDKN1A STAT3 CAV1 ESR1 GSK3B ASXL1" sty  
tes is available below:RB1 MYC AKT1 AR JUN CDKN1A WWOX STAT3 NFKB1 CEBPB E2F4 HNF4  
ates is available below:MYC AKT1 SKP2 NFKB1 CDKN1A HSP90AA1 RELA" style="cursor: pointer;  
ates is available below:SMAD2 SMAD1 SMAD4 SMURF1" style="cursor: pointer; text-decoration: unc  
ites is available below:EHMT2 MYC AKT1 SQSTM1 JUN ESR1 STAT3" style="cursor: pointer; text-d  
strates is available below:CDKN1A SQSTM1 FOXO1 RELA VHL MDM4" style="cursor: pointer; text-c  
tes is available below:RB1 RCHY1 SMAD1 SMAD3" style="cursor: pointer; text-decoration: underline  
ites is available below:TP63 SMARCC1 PARP1 RELA CDKN2A NFKB1" style="cursor: pointer; text-d  
trates is available below:MYC CDKN2A SIAH2 ESR1 SMARCA4" style="cursor: pointer; text-decorati  
ates is available below:MYC HSP90AA1 HDAC2 RELA JUN" style="cursor: pointer; text-decoration: u  
ubstrates is available below:MYC DDX5 CAV1 NFKB1 GSK3B MYOD1 KLF5" style="cursor: pointer; t  
ates is available below:MYC JUN SIAH2 STAT3" style="cursor: pointer; text-decoration: underline dot  
s is available below:AKT1 HSP90AA1 HDAC2 RELA JUN" style="cursor: pointer; text-decoration: unc  
ubstrates is available below:AR PPARGC1A JUN STAT3 NFKB1 PIN1 HSP90AA1 UHRF1 HNF4A REL  
strates is available below:GSK3B TP63 PPARGC1A CDKN2A ESR1" style="cursor: pointer; text-decc  
strates is available below:RELA HIST1H3A TRIM28 STAT3" style="cursor: pointer; text-decoration: u  
trates is available below:GSK3B MYC MYOD1 MAPK1 STAT3" style="cursor: pointer; text-decoration  
trates is available below:RB1 SQSTM1 FOXO1 NFE2L2 HNF4A HDAC5" style="cursor: pointer; text-  
as is available below:HDAC4 HDAC5" style="cursor: pointer; text-decoration: underline dotted;">2 sub  
tes is available below:GTF2B AR E2F1 SMAD1 ESR1" style="cursor: pointer; text-decoration: underli  
tes is available below:AR HIST1H3A JUN CAV1 ESR1 CDKN1A HSP90AA1 STAT3" style="cursor: p  
strates is available below:GSK3B CEBPB MAPK1 JUN ESR1" style="cursor: pointer; text-decoration:  
s is available below:HIST1H3A E2F4 JUN" style="cursor: pointer; text-decoration: underline dotted;">  
ates is available below:MYC AKT1 CEBPA CEBPB" style="cursor: pointer; text-decoration: underline  
es is available below:HIST1H3A MAPK1 STAT3 EZH2" style="cursor: pointer; text-decoration: underli  
as is available below:MYC JUN NFKB1" style="cursor: pointer; text-decoration: underline dotted;">3 s  
ubstrates is available below:RB1 GSK3B JUN NFKB1 MDM4" style="cursor: pointer; text-decoration: u  
tes is available below:SMAD2 SMAD4 SMAD3" style="cursor: pointer; text-decoration: underline dotte  
s is available below:HSP90AA1 JUN" style="cursor: pointer; text-decoration: underline dotted;">2 sub  
strates is available below:CDKN1A MYC JUN CDKN2A" style="cursor: pointer; text-decoration: underli  
strates is available below:MYC SMAD2 CDKN1A NCOR2 HDAC5 RCHY1" style="cursor: pointer; text-  
es is available below:AKT1 WWOX AR" style="cursor: pointer; text-decoration: underline dotted;">3 s  
ates is available below:CDKN1A MYC FOXO4 JUN STAT3" style="cursor: pointer; text-decoration: ur  
tes is available below:RB1 CEBPA CDKN1A" style="cursor: pointer; text-decoration: underline dotted;  
ates is available below:HDAC5 PHB2 RELA" style="cursor: pointer; text-decoration: underline dotted;  
strates is available below:HDAC4 GSK3B SMAD4" style="cursor: pointer; text-decoration: underline dc  
es is available below:HDAC4 HDAC5 JUN NFKB1" style="cursor: pointer; text-decoration: underline c  
trates is available below:HDAC4 RELA" style="cursor: pointer; text-decoration: underline dotted;">2 s

substrates is available below:SMAD2 SMAD1 IRF7" style="cursor: pointer; text-decoration: underline dotted;">2 substrates is available below:KDM5A RB1" style="cursor: pointer; text-decoration: underline dotted;">2 substrates is available below:AKT1 MAPK1 STAT3" style="cursor: pointer; text-decoration: underline dotted;">2 substrates is available below:RELA HSP90AA1 STAT3" style="cursor: pointer; text-decoration: underline dotted;">2 substrates is available below:HDAC4 GSK3B HDAC5" style="cursor: pointer; text-decoration: underline dotted;">2 substrates is available below:AR ESR1 HSP90AA1 NCOR1 STAT3" style="cursor: pointer; text-decoration: underline dotted;">2 substrates is available below:SMAD2 SMAD3" style="cursor: pointer; text-decoration: underline dotted;">2 substrates is available below:HDAC5 PPARGC1A PARP1" style="cursor: pointer; text-decoration: underline dotted;">2 substrates is available below:MYC HDAC5 SMAD2 JUN" style="cursor: pointer; text-decoration: underline dotted;">2 substrates is available below:AR HDAC5 CAV1 PIN1" style="cursor: pointer; text-decoration: underline dotted;">2 substrates is available below:CDKN1A AHR PRKG1 NFE2L2" style="cursor: pointer; text-decoration: underline dotted;">2 substrates is available below:HSP90AA1 MAPK1 NFKB1 SP1" style="cursor: pointer; text-decoration: underline dotted;">2 substrates is available below:TRAF6 SQSTM1" style="cursor: pointer; text-decoration: underline dotted;">2 substrates is available below:DAXX SP1 E2F1 CDKN2A PML" style="cursor: pointer; text-decoration: underline dotted;">2 substrates is available below:GSK3B AKT1 NCOR1 HDAC3" style="cursor: pointer; text-decoration: underline dotted;">1 substrates is available below:AKT1" style="cursor: pointer; text-decoration: underline dotted;">1 substrates is available below:SMAD4" style="cursor: pointer; text-decoration: underline dotted;">1 substrates is available below:HIST1H3A" style="cursor: pointer; text-decoration: underline dotted;">1 substrates is available below:HIST1H3A" style="cursor: pointer; text-decoration: underline dotted;">1 substrates is available below:SMAD4" style="cursor: pointer; text-decoration: underline dotted;">1 substrates is available below:AKT1" style="cursor: pointer; text-decoration: underline dotted;">1 substrate is available below:FBXW7 SP1 EZH2" style="cursor: pointer; text-decoration: underline dotted;">2 substrates is available below:FOXH1 AKT1" style="cursor: pointer; text-decoration: underline dotted;">2 substrates is available below:GSK3B RELA" style="cursor: pointer; text-decoration: underline dotted;">2 substrates is available below:AKT1 CHUK MAPK1" style="cursor: pointer; text-decoration: underline dotted;">2 substrates is available below:STAT3 AKT1" style="cursor: pointer; text-decoration: underline dotted;">2 substrates is available below:RELA HIST1H3A" style="cursor: pointer; text-decoration: underline dotted;">2 substrates is available below:AR RELA NFKB1" style="cursor: pointer; text-decoration: underline dotted;">2 substrates is available below:CDKN1A MYC" style="cursor: pointer; text-decoration: underline dotted;">2 substrates is available below:FOXH1 SMARCA4" style="cursor: pointer; text-decoration: underline dotted;">2 substrates is available below:HIST1H3A" style="cursor: pointer; text-decoration: underline dotted;">1 substrates is available below:HIST1H3A JUN" style="cursor: pointer; text-decoration: underline dotted;">2 substrates is available below:TGFB111 AKT1" style="cursor: pointer; text-decoration: underline dotted;">2 substrates is available below:RB1 YY1 HIST1H3A PIN1 HDAC5" style="cursor: pointer; text-decoration: underline dotted;">2 substrates is available below:FBXW7 FOXO1 MAPK1" style="cursor: pointer; text-decoration: underline dotted;">2 substrates is available below:HDAC5 CDKN1A" style="cursor: pointer; text-decoration: underline dotted;">2 substrates is available below:TRIM28 AKT1 DDX5" style="cursor: pointer; text-decoration: underline dotted;">2 substrates is available below:CDKN1A CAV1" style="cursor: pointer; text-decoration: underline dotted;">2 substrates is available below:AR ESR1 NFKB1 RELA" style="cursor: pointer; text-decoration: underline dotted;">2 substrates is available below:HDAC5 HIST1H3A" style="cursor: pointer; text-decoration: underline dotted;">2 substrates is available below:AKT1 STAT3" style="cursor: pointer; text-decoration: underline dotted;">2 substrates is available below:STAT3 AR" style="cursor: pointer; text-decoration: underline dotted;">2 substrates is available below:AKT1 FOXO1 HIST1H3A ESR1" style="cursor: pointer; text-decoration: underline dotted;">2 substrates is available below:STAT3" style="cursor: pointer; text-decoration: underline dotted;">1 substrates is available below:AKT1 HDAC5 JUN" style="cursor: pointer; text-decoration: underline dotted;">2 substrates is available below:CDKN1A DAXX" style="cursor: pointer; text-decoration: underline dotted;">2 substrates is available below:AKT1 AR" style="cursor: pointer; text-decoration: underline dotted;">2 substrate

substrates is available below:PRKG1 SP1" style="cursor: pointer; text-decoration: underline dotted;">2 substrates is available below:E2F1" style="cursor: pointer; text-decoration: underline dotted;">1 substrates  
ates is available below:AKT1" style="cursor: pointer; text-decoration: underline dotted;">1 substrates"  
s is available below:CEBPB" style="cursor: pointer; text-decoration: underline dotted;">1 substrates"  
s is available below:CEBPB" style="cursor: pointer; text-decoration: underline dotted;">1 substrates"  
es is available below:MAPK1" style="cursor: pointer; text-decoration: underline dotted;">1 substrates"  
es is available below:HIF1A JUN" style="cursor: pointer; text-decoration: underline dotted;">2 substrates is available below:MAPK1 GADD45GIP1" style="cursor: pointer; text-decoration: underline dotted;">1 substrates is available below:FOXO1 SIRT1" style="cursor: pointer; text-decoration: underline dotted;">2 substrates is available below:MYC AR JUN CDKN1A" style="cursor: pointer; text-decoration: underline dotted;">1 substrates is available below:FOXH1 TRAF6" style="cursor: pointer; text-decoration: underline dotted;">2 substrates is available below:NCOR2" style="cursor: pointer; text-decoration: underline dotted;">1 substrate substrates is available below:FOXO1" style="cursor: pointer; text-decoration: underline dotted;">1 substrates is available below:UHRF1 HIF1A" style="cursor: pointer; text-decoration: underline dotted;">2 substrates is available below:GSK3B HSP90AA1" style="cursor: pointer; text-decoration: underline dotted;">1 substrates is available below:RELA" style="cursor: pointer; text-decoration: underline dotted;">1 substrates" s is available below:FOXO1" style="cursor: pointer; text-decoration: underline dotted;">1 substrates" es is available below:JUN" style="cursor: pointer; text-decoration: underline dotted;">1 substrates" trates is available below:AKT1 DAXX" style="cursor: pointer; text-decoration: underline dotted;">2 substrates if substrates is available below:CAV1" style="cursor: pointer; text-decoration: underline dotted;">1 substrates s is available below:HSP90AA1 E2F1 E2F4" style="cursor: pointer; text-decoration: underline dotted;">1 substrates is available below:FOXO1 MDM4" style="cursor: pointer; text-decoration: underline dotted;">1 substrates is available below:RCHY1 PPARGC1A" style="cursor: pointer; text-decoration: underline dotted;">1 substrates is available below:AKT1" style="cursor: pointer; text-decoration: underline dotted;">1 substrates s is available below:MYOD1 CAV1" style="cursor: pointer; text-decoration: underline dotted;">2 substrates is available below:HNF4A AKT1" style="cursor: pointer; text-decoration: underline dotted;">2 substrates is available below:DAXX DDX5 HSP90AA1" style="cursor: pointer; text-decoration: underline dotted;">1 substrates is available below:STAT3" style="cursor: pointer; text-decoration: underline dotted;">1 substrates" f substrates is available below:CEBPB RCHY1" style="cursor: pointer; text-decoration: underline dotted;">1 substrates" es is available below:GTF2B" style="cursor: pointer; text-decoration: underline dotted;">1 substrates" trates is available below:HSP90AA1 MAPK1" style="cursor: pointer; text-decoration: underline dotted;">1 substrates is available below:GSK3B" style="cursor: pointer; text-decoration: underline dotted;">1 substrate ates is available below:AKT1" style="cursor: pointer; text-decoration: underline dotted;">1 substrates" ites is available below:AKT1" style="cursor: pointer; text-decoration: underline dotted;">1 substrates" rates is available below:CHUK HIST1H3A" style="cursor: pointer; text-decoration: underline dotted;">1 substrates is available below:CDKN1A PRKG1" style="cursor: pointer; text-decoration: underline dotted;">2 substrates s is available below:JUN CAV1" style="cursor: pointer; text-decoration: underline dotted;">2 substrates s is available below:AKT1" style="cursor: pointer; text-decoration: underline dotted;">1 substrates" tes is available below:FOXH1" style="cursor: pointer; text-decoration: underline dotted;">1 substrates ates is available below:FOXH1" style="cursor: pointer; text-decoration: underline dotted;">1 substrate es is available below:SMURF1" style="cursor: pointer; text-decoration: underline dotted;">1 substrate ates is available below:SMAD2" style="cursor: pointer; text-decoration: underline dotted;">1 substrate ates is available below:FOXO4" style="cursor: pointer; text-decoration: underline dotted;">1 substrate trates is available below:GSK3B" style="cursor: pointer; text-decoration: underline dotted;">1 substrate ates is available below:FOXO4" style="cursor: pointer; text-decoration: underline dotted;">1 substrate ates is available below:SMAD1" style="cursor: pointer; text-decoration: underline dotted;">1 substrate ates is available below:AKT1" style="cursor: pointer; text-decoration: underline dotted;">1 substrates"

tes is available below:SP1" style="cursor: pointer; text-decoration: underline dotted;">1 substrates"  
trates is available below:SMARCA4" style="cursor: pointer; text-decoration: underline dotted;">1 subse  
tes is available below:FOXH1" style="cursor: pointer; text-decoration: underline dotted;">1 substrates  
ates is available below:PPP1CA" style="cursor: pointer; text-decoration: underline dotted;">1 substrat  
ates is available below:SMARCA4" style="cursor: pointer; text-decoration: underline dotted;">1 substi  
strates is available below:DDX5 CHUK STUB1" style="cursor: pointer; text-decoration: underline dott  
ates is available below:HDAC5" style="cursor: pointer; text-decoration: underline dotted;">1 substrate  
ates is available below:WWP1" style="cursor: pointer; text-decoration: underline dotted;">1 substrate:  
es is available below:PML" style="cursor: pointer; text-decoration: underline dotted;">1 substrates"  
tes is available below:FOXH1" style="cursor: pointer; text-decoration: underline dotted;">1 substrates  
tes is available below:HIST1H3A" style="cursor: pointer; text-decoration: underline dotted;">1 substra  
tes is available below:GSK3B" style="cursor: pointer; text-decoration: underline dotted;">1 substrates'  
tes is available below:HSP90AA1" style="cursor: pointer; text-decoration: underline dotted;">1 substr:  
trates is available below:JUN" style="cursor: pointer; text-decoration: underline dotted;">1 substrates"  
es is available below:STAT3 NFKB1" style="cursor: pointer; text-decoration: underline dotted;">2 sub  
ites is available below:DAXX" style="cursor: pointer; text-decoration: underline dotted;">1 substrates"  
es is available below:FOXO4" style="cursor: pointer; text-decoration: underline dotted;">1 substrates'  
ates is available below:TRAF6" style="cursor: pointer; text-decoration: underline dotted;">1 substrates  
es is available below:HIST1H3A" style="cursor: pointer; text-decoration: underline dotted;">1 substrat  
es is available below:NCOR2" style="cursor: pointer; text-decoration: underline dotted;">1 substrates"  
strates is available below:AKT1" style="cursor: pointer; text-decoration: underline dotted;">1 substrate  
trates is available below:SMARCA4" style="cursor: pointer; text-decoration: underline dotted;">1 subse  
ites is available below:HSP90AA1" style="cursor: pointer; text-decoration: underline dotted;">1 substr:  
trates is available below:SQSTM1 JUN" style="cursor: pointer; text-decoration: underline dotted;">2 s  
ates is available below:SMARCA4" style="cursor: pointer; text-decoration: underline dotted;">1 substr  
strates is available below:EHMT2" style="cursor: pointer; text-decoration: underline dotted;">1 substr  
strates is available below:RELA" style="cursor: pointer; text-decoration: underline dotted;">1 substrat  
strates is available below:PIN1" style="cursor: pointer; text-decoration: underline dotted;">1 substrate  
s is available below:SQSTM1" style="cursor: pointer; text-decoration: underline dotted;">1 substrates  
ates is available below:SIRT1" style="cursor: pointer; text-decoration: underline dotted;">1 substrates  
ates is available below:HIST1H3A" style="cursor: pointer; text-decoration: underline dotted;">1 subst  
ates is available below:CDKN1A" style="cursor: pointer; text-decoration: underline dotted;">1 substrat  
strates is available below:AKT1" style="cursor: pointer; text-decoration: underline dotted;">1 substrate  
tes is available below:SMAD1" style="cursor: pointer; text-decoration: underline dotted;">1 substrates  
ates is available below:FOXO4" style="cursor: pointer; text-decoration: underline dotted;">1 substrate  
es is available below:JUN CAV1" style="cursor: pointer; text-decoration: underline dotted;">2 substrat  
es is available below:VHL" style="cursor: pointer; text-decoration: underline dotted;">1 substrates"  
ates is available below:SMARCA4" style="cursor: pointer; text-decoration: underline dotted;">1 substr  
ates is available below:FBXW7 STAT3" style="cursor: pointer; text-decoration: underline dotted;">2 s  
strates is available below:GSK3B" style="cursor: pointer; text-decoration: underline dotted;">1 substr:  
es is available below:MYOD1" style="cursor: pointer; text-decoration: underline dotted;">1 substrates"  
substrates is available below:FOXO1" style="cursor: pointer; text-decoration: underline dotted;">1 su  
es is available below:ASXL1" style="cursor: pointer; text-decoration: underline dotted;">1 substrates"  
strates is available below:GSK3B" style="cursor: pointer; text-decoration: underline dotted;">1 substr:  
es is available below:MYC CDKN1A SUZ12 YY1 PIN1" style="cursor: pointer; text-decoration: underli  
es is available below:GSK3B" style="cursor: pointer; text-decoration: underline dotted;">1 substrates"  
tes is available below:GSK3B" style="cursor: pointer; text-decoration: underline dotted;">1 substrates'



ites is available below:STAT3" style="cursor: pointer; text-decoration: underline dotted;">1 substrates  
trates is available below:ESR1 HSP90AA1 STAT3" style="cursor: pointer; text-decoration: underline c  
es is available below:EZH2" style="cursor: pointer; text-decoration: underline dotted;">1 substrates"  
es is available below:PPARGC1A" style="cursor: pointer; text-decoration: underline dotted;">1 substr  
ates is available below:FOXH1" style="cursor: pointer; text-decoration: underline dotted;">1 substrate  
es is available below:AKT1" style="cursor: pointer; text-decoration: underline dotted;">1 substrates"  
es is available below:HIST1H3A" style="cursor: pointer; text-decoration: underline dotted;">1 substrat  
tes is available below:SMAD2" style="cursor: pointer; text-decoration: underline dotted;">1 substrates  
ates is available below:PML" style="cursor: pointer; text-decoration: underline dotted;">1 substrates"  
ates is available below:TGFB111" style="cursor: pointer; text-decoration: underline dotted;">1 substrat  
ates is available below:GSK3B" style="cursor: pointer; text-decoration: underline dotted;">1 substrate  
es is available below:HIST1H3A" style="cursor: pointer; text-decoration: underline dotted;">1 substrat  
es is available below:AKT1" style="cursor: pointer; text-decoration: underline dotted;">1 substrates"  
ates is available below:CDKN1A" style="cursor: pointer; text-decoration: underline dotted;">1 substrat  
es is available below:STAT3" style="cursor: pointer; text-decoration: underline dotted;">1 substrates"  
ates is available below:AKT1" style="cursor: pointer; text-decoration: underline dotted;">1 substrates"  
ates is available below:HDAC5" style="cursor: pointer; text-decoration: underline dotted;">1 substrate  
s is available below:YY1 TRIM28 MYC" style="cursor: pointer; text-decoration: underline dotted;">3 s  
ates is available below:PIN1" style="cursor: pointer; text-decoration: underline dotted;">1 substrates"  
es is available below:FBXW7" style="cursor: pointer; text-decoration: underline dotted;">1 substrates"  
trates is available below:CHUK" style="cursor: pointer; text-decoration: underline dotted;">1 substrate  
ates is available below:STAT3" style="cursor: pointer; text-decoration: underline dotted;">1 substrates  
ates is available below:CDKN1A" style="cursor: pointer; text-decoration: underline dotted;">1 substrat  
s is available below:PML" style="cursor: pointer; text-decoration: underline dotted;">1 substrates"  
s is available below:ESR1 IRF1 MAPK1" style="cursor: pointer; text-decoration: underline dotted;">3 :  
ates is available below:FOXH1" style="cursor: pointer; text-decoration: underline dotted;">1 substrate  
es is available below:SQSTM1" style="cursor: pointer; text-decoration: underline dotted;">1 substrate  
ates is available below:SMAD4" style="cursor: pointer; text-decoration: underline dotted;">1 substrate  
s is available below:CAV1" style="cursor: pointer; text-decoration: underline dotted;">1 substrates"  
substrates is available below:STAT3" style="cursor: pointer; text-decoration: underline dotted;">1 sub  
; is available below:STAT3" style="cursor: pointer; text-decoration: underline dotted;">1 substrates"  
es is available below:CEBPB" style="cursor: pointer; text-decoration: underline dotted;">1 substrates"  
ites is available below:PML" style="cursor: pointer; text-decoration: underline dotted;">1 substrates"  
s is available below:PARP1" style="cursor: pointer; text-decoration: underline dotted;">1 substrates"  
ites is available below:HSP90AA1" style="cursor: pointer; text-decoration: underline dotted;">1 substr  
ates is available below:HDAC5" style="cursor: pointer; text-decoration: underline dotted;">1 substrate  
es is available below:SUMO1" style="cursor: pointer; text-decoration: underline dotted;">1 substrates  
es is available below:CDKN1A" style="cursor: pointer; text-decoration: underline dotted;">1 substrate  
ates is available below:AKT1" style="cursor: pointer; text-decoration: underline dotted;">1 substrates"  
s is available below:TGFB111 CAV1 NFE2L2" style="cursor: pointer; text-decoration: underline dotted  
es is available below:ESR1" style="cursor: pointer; text-decoration: underline dotted;">1 substrates"  
substrates is available below:AR" style="cursor: pointer; text-decoration: underline dotted;">1 substrates"  
s is available below:HSP90AA1" style="cursor: pointer; text-decoration: underline dotted;">1 substrat  
ates is available below:HIST1H3A" style="cursor: pointer; text-decoration: underline dotted;">1 subst  
bstrates is available below:RB1" style="cursor: pointer; text-decoration: underline dotted;">1 substrate  
trates is available below:JUN" style="cursor: pointer; text-decoration: underline dotted;">1 substrates"  
trates is available below:PPP1CA STUB1" style="cursor: pointer; text-decoration: underline dotted;">2

substrates is available below:SPI1 AKT1 DAXX CSNK2A1 AR JUN EZH2 FOS SIRT1 STAT3 YY1 SQSTM1

substrates is available below:RB1 AKT1 MED1 CSNK2A1 AR GATA1 JUN SNAI1 EZH2 CDKN1A FOS NCOR2

substrates is available below:SPIB AKT1 MED1 RUNX1 AR TP53 TWIST1 GATA1 JUN CDKN1A FOS VAV1

substrates is available below:TRIM28 TLE1 RUNX1 AR TP53 GATA1 SMAD3 SIAH2 PHF1 SUMO1 SIN3A

substrates is available below:ETS1 ETS2 SPIB PRKCD AR SQSTM1 TP53 GATA1 JUN SMAD3 SP1 TCF3

substrates is available below:AKT1 AR JUN EZH2 FOS STAT3 YY1 SQSTM1 SP1 NFE2L2 TP53 SMARCA4

substrates is available below:CSNK2A1 AR GATA2 JUN EZH2 FOS SIRT1 STAT3 SQSTM1 SP1 NFE2L2

substrates is available below:AKT1 CSNK2A1 AR TP53 TWIST1 GATA2 GATA1 JUN EZH2 CDKN1A FOS NCOR2

substrates is available below:RB1 SPI1 SPIB AKT1 TP53 JUN SMARCA4 NCOR2 RELA YY1 TLE1 VAV1

substrates is available below:RUNX1 AR TP53 TWIST1 JUN CDKN1A FOS SIRT1 RARA SUZ12 STAT3

substrates is available below:RB1 ETS1 ETS2 AR TP53 JUN SMAD3 SP1 TCF3 FOS NCOR2 HDAC4 CEBP

substrates is available below:RB1 SKP2 WDR77 TP53 DNMT1 JUN SMAD3 SP1 TCF3 CDKN1A SUMO1 FOS

substrates is available below:GATA2 JUN FOS SP1 UHRF1 SMARCC1 TP53 SMARCA4 RELA ETS1 BHLHE40

substrates is available below:CDKN1A HSPB1 FOS SIRT1 RUNX1 TP53 RELA MAPK8 JUN SMAD3 STAT3

substrates is available below:TRIM28 PRKCD SQSTM1 TP53 JUN NFE2L2 GSK3B CDKN1A HSPB1 FOS NCOR2

substrates is available below:RB1 TRIM28 SKP2 CSNK2A1 AR TP53 JUN EZH2 CDKN1A PARP1 FOS NCOR2

substrates is available below:AKT1 SKP2 SMARCC1 AR TP53 GATA1 EZH2 CDKN1A NCOR2 TAL1

substrates is available below:TRIM28 AKT1 PRKCD TP53 JUN SP1 TCF3 PARP1 RELA MAPK9 MAPK8

substrates is available below:SPI1 AKT1 TLE1 HDAC2 RELA MAPK9 JUN VDR CDK1" style="cursor: pointer;

substrates is available below:AKT1 AR TP53 DNMT1 JUN SMAD3 SNAI1 GSK3B PHF1 PARP1 CEBP

substrates is available below:JUN FOS DDB2 SP1 UHRF1 TRIM28 SMARCC1 TP53 SMARCA4 BHLHE40

substrates is available below:RB1 SPI1 PRKCD TP53 JUN CDKN1A FOS VAV1 CEBPB HDAC2 STAT3 HIPK2" style="cursor: pointer;

substrates is available below:HSPB1 RELA AKT1 STAT3 FOS SQSTM1 TP53" style="cursor: pointer; text-decoration: underline c

substrates is available below:RB1 HSPB1 RELA JUN FOS TP53" style="cursor: pointer; text-decoration: underline dotted;">6 subst

substrates is available below:RB1 ETS2 AKT1 PRKCD AR TP53 HSPA4 PARP1 FOS MAPK7" style="cursor: pointer; text-decoration

substrates is available below:AKT1 RUNX1 AR TP53 JUN CDKN1A STAT3 BHLHE40 CDK1 GSK3B HSPB1 MAPK9" style="cursor: p

substrates is available below:AR TP53 JUN CDKN1A TCF20 FOS NCOR2 KAT2B STAT3 SMAD3 BHLHE40 CDK1 GSK3B SIN3A" s

substrates is available below:RB1 SPI1 AKT1 PRKCD AR JUN CDKN1A FOS STAT3 HIPK2 CDK1 CEBPB RUNX1 TP53 CALM1 VAV1 SV

substrates is available below:HSPB1 TP53 HDAC4 HDAC5 MAPK9 MAPK8 JUN" style="cursor: pointer; text-decoration: underline

substrates is available below:SPI1 AR JUN FOS STAT3 ZBTB16 UHRF1 TP53 RELA ETS1 VDR BHLHE40 GSK3B RB1 SNAI1 CDKN1

substrates is available below:HSPB1 AKT1 DAXX MAPK9 MAPK8 HSPA4" style="cursor: pointer; text-decoration: underline do

substrates is available below:AKT1 SQSTM1 RELA NONO STAT3 CALM1 HSPA1A" style="cursor: pointer; text-decoration: underlin

substrates is available below:GSK3B FOS VAV1 TP53 CEBPB MAPK7 JUN" style="cursor: pointer; text-decoration: underline dc

substrates is available below:RB1 AR TP53 DNMT1 NFE2L2 GSK3B CDKN1A HDAC5 STAT3 STUB1" style="cursor: pointer; text-de

substrates is available below:CDKN1A ETS2 FOS TP53 JUN STAT3 BHLHE40" style="cursor: pointer; text-decoration: underline c

substrates is available below:SPI1 AKT1 AR JUN FOS STAT3 SQSTM1 NFE2L2 STUB1 TP53 RELA VDR BHLHE40 GSK3B RB1 CDKN

substrates is available below:RB1 SMARCB1 TRIM28 MED1 DAXX TP53 SMARCA4 EZH2 PARP1 SP1 CDK1" style="cursor: pointer;

substrates is available below:RB1 TRIM28 SKP2 MED1 TP53 EZH2 CDKN1A FOS CDK1 SIN3A" style="cursor: pointer; text-decor

substrates is available below:RB1 TRIM28 TP53 SIAH2 PML" style="cursor: pointer; text-decoration: underline dotted;">5 subst

substrates is available below:AKT1 SKP2 MED1 TP53 CDKN1A RELA MAPK8" style="cursor: pointer; text-decoration: underline c

substrates is available below:GSK3B AKT1 PARP1 TP53 JUN" style="cursor: pointer; text-decoration: underline dotted;">5

substrates is available below:CDKN1A CEBPB RELA SNAI1" style="cursor: pointer; text-decoration: underline dotted;">4 substrate:

substrates is available below:GSK3B AKT1 NCOR1 TP53 HDAC3 CDK1" style="cursor: pointer; text-decoration: underline dot

substrates is available below:CDKN1A SKP2 AR UHRF1 RELA" style="cursor: pointer; text-decoration: underline dotted;">5 substr

substrates is available below:RB1 CEBPA CDKN1A RUNX1" style="cursor: pointer; text-decoration: underline dotted;">4 substrat

substrates is available below:ETS1 MAPK7 FOS PML" style="cursor: pointer; text-decoration: underline dotted;">4 substrates"

substrates is available below:GSK3B AKT1 RELA MAPK7 STAT3 SP1" style="cursor: pointer; text-decoration: underline dotted;">

available below: BTRC NCOR2 NCOR1 RELA CALM1 HSPA1A" style="cursor: pointer; text-decoration: underline dotted;">4 substrates

available below: SMARCC1 PARP1 FOS RELA CALM1 HSPA1A" style="cursor: pointer; text-decoration: underline dotted;">4 substrates

available below: TP53 DNMT1 SIAH2 SMARCA4 SNAI1" style="cursor: pointer; text-decoration: underline dotted;">4 substrates

available below: SQSTM1 SMAD3 CALM1 HDAC4 HDAC5 HSPA1A" style="cursor: pointer; text-decoration: underline dotted;">4 substrates

available below: MAPK9 MAPK8 AKT1 STAT3" style="cursor: pointer; text-decoration: underline dotted;">4 substrates

available below: HDAC4 GSK3B HDAC5 PHF1" style="cursor: pointer; text-decoration: underline dotted;">4 substrates

available below: AR TP53 JUN CDK1 CDKN1A PRMT1 FOS" style="cursor: pointer; text-decoration: underline dotted;">4 substrates

available below: JUN SIAH2 STAT3 TP53" style="cursor: pointer; text-decoration: underline dotted;">4 substrates

available below: RELA TRIM28 STAT3 RARA" style="cursor: pointer; text-decoration: underline dotted;">4 substrates

available below: RB1 MED1 SQSTM1 TP53 NFE2L2 HDAC5" style="cursor: pointer; text-decoration: underline dotted;">5 substrates

available below: GSK3B FOS TAL1 MAPK8 STAT3" style="cursor: pointer; text-decoration: underline dotted;">5 substrates

available below: TP53 SMAD3 PML SP1 SNAI1" style="cursor: pointer; text-decoration: underline dotted;">5 substrates

available below: HSPB1 AKT1 HDAC5 JUN SNAI1" style="cursor: pointer; text-decoration: underline dotted;">5 substrates

available below: ETS1 AR CDK1 VAV1 NCOR1 STAT3" style="cursor: pointer; text-decoration: underline dotted;">6 substrates

available below: GSK3B RELA RARA" style="cursor: pointer; text-decoration: underline dotted;">3 substrates

available below: SPI1 YY1 TRIM28 CSNK2A1 PRKCD TP53 VAV1" style="cursor: pointer; text-decoration: underline dotted;">4 substrates

available below: HDAC4 HDAC5" style="cursor: pointer; text-decoration: underline dotted;">2 substrates

available below: NCOR2 RELA" style="cursor: pointer; text-decoration: underline dotted;">2 substrates

available below: GSK3B CDKN1A RELA AKT1" style="cursor: pointer; text-decoration: underline dotted;">4 substrates

available below: AKT1 BTRC RELA CALM1 HSPA1A" style="cursor: pointer; text-decoration: underline dotted;">5 substrates

available below: RELA NCOR2 AKT1" style="cursor: pointer; text-decoration: underline dotted;">3 substrates

available below: TP53 JUN HSPB1 FOS CEBPB PML" style="cursor: pointer; text-decoration: underline dotted;">6 substrates

available below: GSK3B CDKN1A AR TP53 SKI" style="cursor: pointer; text-decoration: underline dotted;">5 substrates

available below: CEBPB TP53" style="cursor: pointer; text-decoration: underline dotted;">2 substrates

available below: RB1 GSK3B FOS TP53 JUN" style="cursor: pointer; text-decoration: underline dotted;">5 substrates

available below: CDKN1A FOS JUN BHLHE40" style="cursor: pointer; text-decoration: underline dotted;">4 substrates

available below: GSK3B CDKN1A RELA" style="cursor: pointer; text-decoration: underline dotted;">3 substrates

available below: JUN TP53" style="cursor: pointer; text-decoration: underline dotted;">2 substrates

available below: SPIB HDAC2 RELA JUN" style="cursor: pointer; text-decoration: underline dotted;">4 substrates

available below: RB1 CDKN1A JUN" style="cursor: pointer; text-decoration: underline dotted;">3 substrates

available below: PRKCD AR JUN CALM1 CDKN1A FOS STAT3" style="cursor: pointer; text-decoration: underline dotted;">4 substrates

available below: RUNX1 CDK1 TP53" style="cursor: pointer; text-decoration: underline dotted;">3 substrates

available below: HDAC4 RELA" style="cursor: pointer; text-decoration: underline dotted;">2 substrates

available below: RB1 SMAD3 TP53" style="cursor: pointer; text-decoration: underline dotted;">3 substrates

available below: HSPB1 TRIM28 AKT1 TP53" style="cursor: pointer; text-decoration: underline dotted;">4 substrates

available below: FOS VAV1 TP53 JUN" style="cursor: pointer; text-decoration: underline dotted;">4 substrates

available below: CDKN1A MAPK8 DAXX" style="cursor: pointer; text-decoration: underline dotted;">3 substrates

available below: JUN TP53" style="cursor: pointer; text-decoration: underline dotted;">2 substrates

available below: RELA STAT3 TP53" style="cursor: pointer; text-decoration: underline dotted;">3 substrates

available below: AKT1 SQSTM1 DNMT1 JUN STAT3" style="cursor: pointer; text-decoration: underline dotted;">5 substrates

available below: FOS SQSTM1 TP53 JUN" style="cursor: pointer; text-decoration: underline dotted;">4 substrates

available below: AR RARA TP53 CDK1" style="cursor: pointer; text-decoration: underline dotted;">4 substrates

available below: HDAC5 PARP1 TP53" style="cursor: pointer; text-decoration: underline dotted;">3 substrates

available below: SIRT1 RUNX1 TP53" style="cursor: pointer; text-decoration: underline dotted;">3 substrates

available below: CDKN1A SQSTM1 TP53 RELA" style="cursor: pointer; text-decoration: underline dotted;">4 substrates

available below: ETS1 ETS2 CDKN1A NCOR2 HDAC5" style="cursor: pointer; text-decoration: underline dotted;">5 substrates

available below: DNMT1 UHRF1 TP53" style="cursor: pointer; text-decoration: underline dotted;">3 substrates

able below:HSPA4 SP1 EZH2" style="cursor: pointer; text-decoration: underline dotted;">3 substrates"  
lable below:AKT1 CEBPA CEBPB" style="cursor: pointer; text-decoration: underline dotted;">3 substrates"  
lable below:AKT1" style="cursor: pointer; text-decoration: underline dotted;">1 substrates"  
ailable below:AKT1" style="cursor: pointer; text-decoration: underline dotted;">1 substrates"  
available below:AKT1 PRKCD MAPK8" style="cursor: pointer; text-decoration: underline dotted;">3 substrates"  
lable below:PRKCD AKT1" style="cursor: pointer; text-decoration: underline dotted;">2 substrates"  
ailable below:FOXH1 AKT1" style="cursor: pointer; text-decoration: underline dotted;">2 substrates"  
ailable below:SMARCA4 CDK1" style="cursor: pointer; text-decoration: underline dotted;">2 substrates"  
ailable below:FOS SNAI1" style="cursor: pointer; text-decoration: underline dotted;">2 substrates"  
able below:DAXX KAT6A" style="cursor: pointer; text-decoration: underline dotted;">2 substrates"  
lable below:STAT3 AKT1" style="cursor: pointer; text-decoration: underline dotted;">2 substrates"  
lable below:RB1 YY1 TP53 CDK1 HDAC5" style="cursor: pointer; text-decoration: underline dotted;">5 substrates"  
lable below:CDKN1A TP53" style="cursor: pointer; text-decoration: underline dotted;">2 substrates"  
lable below:GATA1 TCF3" style="cursor: pointer; text-decoration: underline dotted;">2 substrates"  
lable below:FOXH1 SMARCA4" style="cursor: pointer; text-decoration: underline dotted;">2 substrates"  
lable below:JUN TP53" style="cursor: pointer; text-decoration: underline dotted;">2 substrates"  
able below:DAXX NONO CALM1 HSPA1A" style="cursor: pointer; text-decoration: underline dotted;">4 substrates"  
ailable below:CDK1 CALM1 HSPA1A" style="cursor: pointer; text-decoration: underline dotted;">3 substrates"  
lable below:SMAD3 TP53" style="cursor: pointer; text-decoration: underline dotted;">2 substrates"  
ailable below:GSK3B HSPB1" style="cursor: pointer; text-decoration: underline dotted;">2 substrates"  
lable below:GSK3B PRKCD" style="cursor: pointer; text-decoration: underline dotted;">2 substrates"  
lable below:AKT1 AR" style="cursor: pointer; text-decoration: underline dotted;">2 substrates"  
lable below:SMAD3 STAT3" style="cursor: pointer; text-decoration: underline dotted;">2 substrates"  
ailable below:HDAC5 CDKN1A" style="cursor: pointer; text-decoration: underline dotted;">2 substrates"  
lable below:HDAC5 RELA" style="cursor: pointer; text-decoration: underline dotted;">2 substrates"  
lable below:GSK3B AKT1 PRKCD" style="cursor: pointer; text-decoration: underline dotted;">3 substrates"  
ailable below:CDKN1A FOS" style="cursor: pointer; text-decoration: underline dotted;">2 substrates"  
able below:MAPK9 MAPK8" style="cursor: pointer; text-decoration: underline dotted;">2 substrates"  
able below:CDKN1A SNAI1" style="cursor: pointer; text-decoration: underline dotted;">2 substrates"  
ailable below:HDAC4 GSK3B" style="cursor: pointer; text-decoration: underline dotted;">2 substrates"  
lable below:VAV1 RUNX1" style="cursor: pointer; text-decoration: underline dotted;">2 substrates"  
able below:AKT1 TP53" style="cursor: pointer; text-decoration: underline dotted;">2 substrates"  
lable below:AKT1 STAT3" style="cursor: pointer; text-decoration: underline dotted;">2 substrates"  
lable below:STAT3 AR" style="cursor: pointer; text-decoration: underline dotted;">2 substrates"  
lable below:DAXX TP53 SP1 PML" style="cursor: pointer; text-decoration: underline dotted;">4 substrates"  
available below:HSPB1 TP53" style="cursor: pointer; text-decoration: underline dotted;">2 substrates"  
lable below:PRKCD AR HDAC5" style="cursor: pointer; text-decoration: underline dotted;">3 substrates"  
lable below:CDKN1A TP53" style="cursor: pointer; text-decoration: underline dotted;">2 substrates"  
available below:CALM1 RARA STUB1 HSPA1A" style="cursor: pointer; text-decoration: underline dotted;">4 substrates"  
lable below:FOS TP53 JUN" style="cursor: pointer; text-decoration: underline dotted;">3 substrates"  
lable below:AKT1 AR" style="cursor: pointer; text-decoration: underline dotted;">2 substrates"  
ailable below:UXT HSPA4 CALM1 STUB1 HSPA1A" style="cursor: pointer; text-decoration: underline dotted;">4 substrates"  
lable below:STAT3" style="cursor: pointer; text-decoration: underline dotted;">1 substrates"  
available below:PRKCD TP53 GSK3B MAPK7" style="cursor: pointer; text-decoration: underline dotted;">4 substrates"  
lable below:CDKN1A AHR NFE2L2" style="cursor: pointer; text-decoration: underline dotted;">3 substrates"  
available below:SP1 TP53" style="cursor: pointer; text-decoration: underline dotted;">2 substrates"  
lable below:SPI1 PRKCD FOS VAV1 NFE2L2" style="cursor: pointer; text-decoration: underline dotted;">5 substrates"

ible below:TP53" style="cursor: pointer; text-decoration: underline dotted;">1 substrates"  
ible below:TP53" style="cursor: pointer; text-decoration: underline dotted;">1 substrates"  
lable below:AKT1" style="cursor: pointer; text-decoration: underline dotted;">1 substrates"  
ailable below:FOS TP53 JUN" style="cursor: pointer; text-decoration: underline dotted;">3 substrates"  
ble below:JUN TP53" style="cursor: pointer; text-decoration: underline dotted;">2 substrates"  
able below:AES TP53" style="cursor: pointer; text-decoration: underline dotted;">2 substrates"  
ailable below:MAPK9 MAPK8" style="cursor: pointer; text-decoration: underline dotted;">2 substrates"  
s available below:PRKCD STAT3" style="cursor: pointer; text-decoration: underline dotted;">2 substrates"  
e below:LMO2 STAT3" style="cursor: pointer; text-decoration: underline dotted;">2 substrates"  
le below:CEBPB" style="cursor: pointer; text-decoration: underline dotted;">1 substrates"  
le below:STAT3 TP53" style="cursor: pointer; text-decoration: underline dotted;">2 substrates"  
able below:PML HSPA1A" style="cursor: pointer; text-decoration: underline dotted;">2 substrates"  
ailable below:RELA SQSTM1" style="cursor: pointer; text-decoration: underline dotted;">2 substrates"  
able below:CALM1 HSPA1A" style="cursor: pointer; text-decoration: underline dotted;">2 substrates"  
ailable below:HSPB1 FOXH1" style="cursor: pointer; text-decoration: underline dotted;">2 substrates"  
ailable below:TP53" style="cursor: pointer; text-decoration: underline dotted;">1 substrates"  
lable below:HDAC5 ETS1" style="cursor: pointer; text-decoration: underline dotted;">2 substrates"  
ible below:CDKN1A TP53" style="cursor: pointer; text-decoration: underline dotted;">2 substrates"  
lable below:NCOR2" style="cursor: pointer; text-decoration: underline dotted;">1 substrates"  
le below:FOS" style="cursor: pointer; text-decoration: underline dotted;">1 substrates"  
; is available below:TP53" style="cursor: pointer; text-decoration: underline dotted;">1 substrates"  
ailable below:HSPB1 SMAD3" style="cursor: pointer; text-decoration: underline dotted;">2 substrates"  
ible below:TP53 MAPK7" style="cursor: pointer; text-decoration: underline dotted;">2 substrates"  
le below:RELA" style="cursor: pointer; text-decoration: underline dotted;">1 substrates"  
ailable below:TP53" style="cursor: pointer; text-decoration: underline dotted;">1 substrates"  
ble below:STAT3 EZH2" style="cursor: pointer; text-decoration: underline dotted;">2 substrates"  
le below:SPI1 PRKCD TP53 VAV1" style="cursor: pointer; text-decoration: underline dotted;">4 substrates"  
ailable below:TP53" style="cursor: pointer; text-decoration: underline dotted;">1 substrates"  
available below:TP53 CDK1" style="cursor: pointer; text-decoration: underline dotted;">2 substrates"  
able below:FOS VAV1" style="cursor: pointer; text-decoration: underline dotted;">2 substrates"  
is available below:ETS1 FOS" style="cursor: pointer; text-decoration: underline dotted;">2 substrates"  
ble below:FOS" style="cursor: pointer; text-decoration: underline dotted;">1 substrates"  
ible below:RB1" style="cursor: pointer; text-decoration: underline dotted;">1 substrates"  
ailable below:PRKCD" style="cursor: pointer; text-decoration: underline dotted;">1 substrates"  
available below:AR FOS RELA" style="cursor: pointer; text-decoration: underline dotted;">3 substrates"  
ilable below:AKT1" style="cursor: pointer; text-decoration: underline dotted;">1 substrates"  
ilable below:HSPB1" style="cursor: pointer; text-decoration: underline dotted;">1 substrates"  
is available below:AR RELA" style="cursor: pointer; text-decoration: underline dotted;">2 substrates"  
lable below:AKT1 VAV1" style="cursor: pointer; text-decoration: underline dotted;">2 substrates"  
ble below:GSK3B AES" style="cursor: pointer; text-decoration: underline dotted;">2 substrates"  
s is available below:ETS1 CEBPB" style="cursor: pointer; text-decoration: underline dotted;">2 substrates"  
ailable below:SMAD3" style="cursor: pointer; text-decoration: underline dotted;">1 substrates"  
ible below:AKT1 PRKCD SNAI1" style="cursor: pointer; text-decoration: underline dotted;">3 substrates"  
le below:STAT3" style="cursor: pointer; text-decoration: underline dotted;">1 substrates"  
ble below:TP53" style="cursor: pointer; text-decoration: underline dotted;">1 substrates"  
lable below:CDKN1A HSPB1" style="cursor: pointer; text-decoration: underline dotted;">2 substrates"  
ible below:SQSTM1" style="cursor: pointer; text-decoration: underline dotted;">1 substrates"





able below:FOXH1" style="cursor: pointer; text-decoration: underline dotted;">1 substrates"  
e below:ETS1" style="cursor: pointer; text-decoration: underline dotted;">1 substrates"  
ible below:PRKCD" style="cursor: pointer; text-decoration: underline dotted;">1 substrates"  
ble below:SQSTM1" style="cursor: pointer; text-decoration: underline dotted;">1 substrates"  
le below:SPI1" style="cursor: pointer; text-decoration: underline dotted;">1 substrates"  
ailable below:GADD45GIP1" style="cursor: pointer; text-decoration: underline dotted;">1 substrates"  
ble below:CEBPB" style="cursor: pointer; text-decoration: underline dotted;">1 substrates"  
ole below:PARP1" style="cursor: pointer; text-decoration: underline dotted;">1 substrates"  
le below:STAT3" style="cursor: pointer; text-decoration: underline dotted;">1 substrates"  
ble below:SUMO1" style="cursor: pointer; text-decoration: underline dotted;">1 substrates"  
lable below:GSK3B" style="cursor: pointer; text-decoration: underline dotted;">1 substrates"  
ible below:CDK1" style="cursor: pointer; text-decoration: underline dotted;">1 substrates"  
lable below:AKT1" style="cursor: pointer; text-decoration: underline dotted;">1 substrates"  
ole below:ETS1" style="cursor: pointer; text-decoration: underline dotted;">1 substrates"  
available below:AR" style="cursor: pointer; text-decoration: underline dotted;">1 substrates"  
ble below:CDK1" style="cursor: pointer; text-decoration: underline dotted;">1 substrates"  
ible below:MAPK7" style="cursor: pointer; text-decoration: underline dotted;">1 substrates"  
lable below:SPI1" style="cursor: pointer; text-decoration: underline dotted;">1 substrates"  
lable below:STAT3" style="cursor: pointer; text-decoration: underline dotted;">1 substrates"  
available below:SPI1 AKT1 DAXX AR JUN EZH2 FOS SIRT1 STAT3 YY1 CDC25B SQSTM1 FOXO3 FOXO1 FOXM1 SI  
ailable below:RB1 AKT1 MED1 AR GATA1 JUN EZH2 TGFB1I1 FOS NCOR2 STAT3 TLE1 CDC25B FOXO3 FOXO1 B  
available below:AKT1 AR JUN EZH2 FOS STAT3 YY1 CDC25B SQSTM1 FOXO3 FOXO1 SP1 NFE2L2 FOXM1 SMARC  
ailable below:SPIB AKT1 MED1 RUNX1 AR GATA1 JUN FOS VAV1 TAL1 STAT3 ETS1 FOXO3 FOXO1 SMAD4 SMA  
ilable below:TLE1 RUNX1 AR GATA1 SMAD1 SMAD3 CAV1 SIAH2 SUMO1 SIN3A PAX6 SIRT1 NCOR1 HDAC4 CEF  
able below:ETS1 SPIB AR SQSTM1 GATA1 SMAD1 JUN SMAD4 SMAD3 SP1 TCF3 FOS NCOR2 TAL1 HDAC4 CEBF  
lable below:AR GATA2 JUN EZH2 FOS SIRT1 STAT3 CDC25B SQSTM1 FOXO3 FOXO1 SP1 NFE2L2 FOXM1 STUB1  
; available below:RB1 SPI1 SPIB AKT1 JUN SMARCA4 NCOR2 RELA YY1 TLE1 CDC25B VDR SP1 CDK1 SUMO1 SIN  
lable below:RB1 SKP2 CDC25B WDR77 CCNE1 DNMT1 FOXO1 JUN SMAD3 SP1 TCF3 FOXM1 SUMO1 RBL1 CEBI  
lable below:AKT1 AR GATA2 GATA1 JUN EZH2 FOS NCOR1 TAL1 RARA STAT3 SKI PIAS2 CDC25B DNMT1 FOXO3  
ailable below:GATA2 JUN FOS CDC25B SP1 SMARCC1 SMARCA4 RELA ETS1 CAV1 TCF3 NCOR2 NCOR1 TLE1 BCL  
able below:RB1 ETS1 AR SMAD1 JUN SMAD4 SMAD3 SP1 TCF3 FOS NCOR2 HDAC4 CEBPB RELA STAT3" style=""  
; available below:AKT1 AR CCNE1 DNMT1 FOXO3 FOXO1 SMAD1 JUN SMAD3 GSK3B HNF4A CEBPB TCF7L2 STA  
able below:FOXM1 HNF4A FOS SIRT1 RUNX1 RELA MAPK8 JUN SMAD3 STAT3 SP1" style="cursor: pointer; text  
ailable below:RUNX1 AR JUN FOS SIRT1 RARA SUZ12 STAT3 TLE1 CDC25B FOXO3 SP1 CDK1 NFE2L2 SIN3A STU  
lable below:JUN FOS DDB2 CDC25B SP1 SMARCC1 SMARCA4 CAV1 TCF3 RNF4 WDR77 NCOR2 USP7 TLE1 CEBF  
le below:SPI1 AKT1 TLE1 CDC25B HDAC2 RELA JUN VDR CDK1" style="cursor: pointer; text-decoration: underli  
; available below:AKT1 SKP2 SMARCC1 AR GATA1 EZH2 NCOR2 TAL1 RARA RELA FOXO3 FOXO1 SMAD3 GSK3B  
ailable below:SPI1 AKT1 AR JUN FOS STAT3 SQSTM1 NFE2L2 STUB1 HNF4A RELA CCNE1 VDR CAV1 GSK3B IRF1  
lable below:RB1 SKP2 AR JUN EZH2 FOS NCOR1 RELA STAT3 CDC25B CCNE1 FOXO1 CDK1 FOXM1 RBL1" style=  
available below:AR JUN TCF20 HNF4A FOS NCOR2 KAT2B STAT3 CDC25B FOXO3 SMAD3 CDK1 GSK3B SIN3A" st  
available below:SPI1 AR JUN FOS STAT3 CDC25B FOXO3 HNF4A RELA ETS1 CCNE1 VDR CAV1 GSK3B RB1 AES NC  
ailable below:FOXO3 RELA AKT1 STAT3 FOS SQSTM1" style="cursor: pointer; text-decoration: underline dotte  
; available below:GSK3B HNF4A AKT1 FOXO3 FOXO1 JUN" style="cursor: pointer; text-decoration: underline d  
ble below:AKT1 SQSTM1 RELA NONO STAT3 CALM1 HSPA1A" style="cursor: pointer; text-decoration: underlin  
lable below:SQSTM1 JUN CAV1 NFE2L2 GSK3B FOS VAV1 MAPK8 STAT3" style="cursor: pointer; text-decoratic  
able below:AKT1 BTRC IRF1 FOXO3 RELA CALM1 HSPA1A" style="cursor: pointer; text-decoration: underline dc  
available below:GSK3B AKT1 CDC25B NCOR1 CCNE1 HDAC3 CDK1" style="cursor: pointer; text-decoration: unc



available below:RB1 SPI1 JUN CAV1 FOS VAV1 CEBPB HDAC2 STAT3" style="cursor: pointer; text-decoration: underline dotted;">4 substrates" available below:RB1 SKP2 MED1 EZH2 FOS CDC25B CCNE1 CDK1 FOXM1 SIN3A" style="cursor: pointer; text-decoration: underline dotted;">4 substrates" available below:FOXO3 RELA NCOR2 AKT1" style="cursor: pointer; text-decoration: underline dotted;">4 substrates" available below:FOXO1 HNF4A TCF7L2 SMAD4 STAT3" style="cursor: pointer; text-decoration: underline dotted;">5 substrates" available below:RB1 SPI1 AKT1 AR JUN FOS STAT3 CDK1 CEBPB RUNX1 CALM1 HNF4A VAV1 SMAD3 CAV1" style="cursor: pointer; text-decoration: underline dotted;">4 substrates" available below:RB1 MED1 SQSTM1 FOXO3 FOXO1 NFE2L2 HNF4A" style="cursor: pointer; text-decoration: underline dotted;">4 substrates" available below:GSK3B FOXO3 FOXO1 RELA AKT1" style="cursor: pointer; text-decoration: underline dotted;">5 substrates" available below:AKT1 JUN SMAD4 SP1 TCF3 RELA MAPK8" style="cursor: pointer; text-decoration: underline dotted;">4 substrates" available below:GSK3B FOS VAV1 CDC25B CEBPB JUN" style="cursor: pointer; text-decoration: underline dotted;">4 substrates" available below:GSK3B FOXO3 FOXO1 RELA" style="cursor: pointer; text-decoration: underline dotted;">4 substrates" available below:GSK3B AKT1 PIAS4 RELA STAT3 SP1" style="cursor: pointer; text-decoration: underline dotted;">6 substrates" available below:RB1 CEBPA FOXM1 RUNX1" style="cursor: pointer; text-decoration: underline dotted;">4 substrates" available below:RB1 RELA JUN FOS" style="cursor: pointer; text-decoration: underline dotted;">4 substrates" available below:SMARCC1 FOS FOXO3 RELA CALM1 HSPA1A" style="cursor: pointer; text-decoration: underline dotted;">4 substrates" available below:SPIB HDAC2 RELA TCF7L2 JUN" style="cursor: pointer; text-decoration: underline dotted;">5 substrates" available below:RB1 AR DNMT1 FOXO1 NFE2L2 GSK3B STAT3 STUB1" style="cursor: pointer; text-decoration: underline dotted;">4 substrates" available below:GSK3B AKT1 PRKG1 FOXO3 FOXO1" style="cursor: pointer; text-decoration: underline dotted;">5 substrates" available below:GSK3B FOS TAL1 MAPK8 STAT3" style="cursor: pointer; text-decoration: underline dotted;">5 substrates" available below:TGFB1I1 SMAD3 CAV1 PML SP1" style="cursor: pointer; text-decoration: underline dotted;">5 substrates" available below:ETS1 AR CDK1 VAV1 NCOR1 STAT3" style="cursor: pointer; text-decoration: underline dotted;">6 substrates" available below:RB1 MED1 DAXX SMARCA4 EZH2 SMAD1 SP1 CDK1 RBL1" style="cursor: pointer; text-decoration: underline dotted;">4 substrates" available below:AR CCNE1 RARA SMAD1 CDK1" style="cursor: pointer; text-decoration: underline dotted;">5 substrates" available below:GSK3B RELA RARA" style="cursor: pointer; text-decoration: underline dotted;">3 substrates" available below:AKT1 RUNX1 AR JUN STAT3 CAV1 CDK1 GSK3B" style="cursor: pointer; text-decoration: underline dotted;">4 substrates" available below:NCOR2 RELA" style="cursor: pointer; text-decoration: underline dotted;">2 substrates" available below:TRAF6 SMAD1 SMAD4 SMAD3" style="cursor: pointer; text-decoration: underline dotted;">4 substrates" available below:CDC25B JUN HNF4A FOS CEBPB PML" style="cursor: pointer; text-decoration: underline dotted;">4 substrates" available below:RB1 FOXM1 SIAH2 PML" style="cursor: pointer; text-decoration: underline dotted;">4 substrates" available below:GSK3B FOXM1 CDC25B AR SKI" style="cursor: pointer; text-decoration: underline dotted;">5 substrates" available below:AKT1 CCNE1 CEBPA CEBPB" style="cursor: pointer; text-decoration: underline dotted;">4 substrates" available below:SKP2 AR FOXO3 RELA" style="cursor: pointer; text-decoration: underline dotted;">4 substrates" available below:RB1 AKT1 CDC25B AR PRKG1 FOS" style="cursor: pointer; text-decoration: underline dotted;">6 substrates" available below:SMAD4 SMAD3 CDC25B" style="cursor: pointer; text-decoration: underline dotted;">3 substrates" available below:SMAD1 SMAD3 STAT3" style="cursor: pointer; text-decoration: underline dotted;">3 substrates" available below:CEBPB RELA CCNE1" style="cursor: pointer; text-decoration: underline dotted;">3 substrates" available below:MED1 SMAD1 SMAD4" style="cursor: pointer; text-decoration: underline dotted;">3 substrates" available below:ETS1 FOS PML" style="cursor: pointer; text-decoration: underline dotted;">3 substrates" available below:SQSTM1 SMAD3 CALM1 HDAC4 HSPA1A" style="cursor: pointer; text-decoration: underline dotted;">4 substrates" available below:HDAC4 GSK3B SMAD4" style="cursor: pointer; text-decoration: underline dotted;">3 substrates" available below:RB1 JUN CCNE1" style="cursor: pointer; text-decoration: underline dotted;">3 substrates" available below:HDAC4 RELA" style="cursor: pointer; text-decoration: underline dotted;">2 substrates" available below:FOS VAV1 JUN CAV1" style="cursor: pointer; text-decoration: underline dotted;">4 substrates" available below:RB1 SMAD1 SMAD3" style="cursor: pointer; text-decoration: underline dotted;">3 substrates" available below:AKT1 SKP2 MED1 RELA MAPK8" style="cursor: pointer; text-decoration: underline dotted;">5 substrates" available below:AKT1 SQSTM1 DNMT1 JUN STAT3" style="cursor: pointer; text-decoration: underline dotted;">5 substrates" available below:MAPK8 AKT1 STAT3" style="cursor: pointer; text-decoration: underline dotted;">3 substrates"

available below:FOS CDC25B SQSTM1 JUN" style="cursor: pointer; text-decoration: underline dotted;">4 substrates

available below:JUN SIAH2 STAT3" style="cursor: pointer; text-decoration: underline dotted;">3 substrates

available below:FOXO1 SIRT1 RUNX1" style="cursor: pointer; text-decoration: underline dotted;">3 substrates

available below:RELA STAT3 RARA" style="cursor: pointer; text-decoration: underline dotted;">3 substrates

available below:RB1 GSK3B FOS JUN" style="cursor: pointer; text-decoration: underline dotted;">4 substrates

available below:TRAF6 SQSTM1" style="cursor: pointer; text-decoration: underline dotted;">2 substrates

available below:AR JUN CAV1 CALM1 FOS STAT3" style="cursor: pointer; text-decoration: underline dotted;">6 substrates

available below:AR JUN CDK1 PRMT1 FOS" style="cursor: pointer; text-decoration: underline dotted;">5 substrates

available below:AKT1 DAXX MAPK8" style="cursor: pointer; text-decoration: underline dotted;">3 substrates

available below:SPI1 TGFB1I1 FOS VAV1 CAV1 NFE2L2" style="cursor: pointer; text-decoration: underline dotted;">6 substrates

available below:FOXH1 AKT1" style="cursor: pointer; text-decoration: underline dotted;">2 substrates

available below:AKT1" style="cursor: pointer; text-decoration: underline dotted;">1 substrates

available below:SMAD4" style="cursor: pointer; text-decoration: underline dotted;">1 substrates

available below:SMAD4" style="cursor: pointer; text-decoration: underline dotted;">1 substrates

available below:AKT1" style="cursor: pointer; text-decoration: underline dotted;">1 substrates

available below:SMARCA4 CDK1" style="cursor: pointer; text-decoration: underline dotted;">2 substrates

available below:HNF4A AKT1 VAV1" style="cursor: pointer; text-decoration: underline dotted;">3 substrates

available below:STAT3 AKT1" style="cursor: pointer; text-decoration: underline dotted;">2 substrates

available below:GATA1 TCF3" style="cursor: pointer; text-decoration: underline dotted;">2 substrates

available below:DNMT1 SIAH2 SMARCA4" style="cursor: pointer; text-decoration: underline dotted;">3 substrates

available below:HDAC4 MAPK8 JUN" style="cursor: pointer; text-decoration: underline dotted;">3 substrates

available below:FOXH1 SMARCA4" style="cursor: pointer; text-decoration: underline dotted;">2 substrates

available below:DAXX NONO CALM1 HSPA1A" style="cursor: pointer; text-decoration: underline dotted;">4 substrates

available below:TGFB1I1 AKT1" style="cursor: pointer; text-decoration: underline dotted;">2 substrates

available below:CDK1 CALM1 HSPA1A" style="cursor: pointer; text-decoration: underline dotted;">3 substrates

available below:CDC25B AR FOS RELA" style="cursor: pointer; text-decoration: underline dotted;">4 substrates

available below:AKT1 AR" style="cursor: pointer; text-decoration: underline dotted;">2 substrates

available below:CAV1 FOS" style="cursor: pointer; text-decoration: underline dotted;">2 substrates

available below:GSK3B CCNE1" style="cursor: pointer; text-decoration: underline dotted;">2 substrates

available below:VAV1 RUNX1" style="cursor: pointer; text-decoration: underline dotted;">2 substrates

available below:AKT1 STAT3" style="cursor: pointer; text-decoration: underline dotted;">2 substrates

available below:STAT3 AR" style="cursor: pointer; text-decoration: underline dotted;">2 substrates

available below:RUNX1 CDK1" style="cursor: pointer; text-decoration: underline dotted;">2 substrates

available below:CALM1 RARA STUB1 HSPA1A" style="cursor: pointer; text-decoration: underline dotted;">4 substrates

available below:RB1 FOXM1 CDK1" style="cursor: pointer; text-decoration: underline dotted;">3 substrates

available below:FOS JUN CAV1" style="cursor: pointer; text-decoration: underline dotted;">3 substrates

available below:MAPK8 DAXX" style="cursor: pointer; text-decoration: underline dotted;">2 substrates

available below:AKT1 AR" style="cursor: pointer; text-decoration: underline dotted;">2 substrates

available below:AHR PRKG1 NFE2L2" style="cursor: pointer; text-decoration: underline dotted;">3 substrates

available below:SQSTM1 FOXO1 RELA" style="cursor: pointer; text-decoration: underline dotted;">3 substrates

available below:HDAC4" style="cursor: pointer; text-decoration: underline dotted;">1 substrates

available below:STAT3" style="cursor: pointer; text-decoration: underline dotted;">1 substrates

available below:PRKG1 SP1" style="cursor: pointer; text-decoration: underline dotted;">2 substrates

available below:RELA STAT3" style="cursor: pointer; text-decoration: underline dotted;">2 substrates

available below:HDAC4 GSK3B" style="cursor: pointer; text-decoration: underline dotted;">2 substrates

available below:FOS CDC25B JUN" style="cursor: pointer; text-decoration: underline dotted;">3 substrates

available below:CDC25B" style="cursor: pointer; text-decoration: underline dotted;">1 substrates

lable below:AKT1" style="cursor: pointer; text-decoration: underline dotted;">1 substrates"  
le below:CEBPB" style="cursor: pointer; text-decoration: underline dotted;">1 substrates"  
able below:SMAD4 AES" style="cursor: pointer; text-decoration: underline dotted;">2 substrates"  
ilable below:FOS JUN STAT3" style="cursor: pointer; text-decoration: underline dotted;">3 substrates"  
able below:PML HSPA1A" style="cursor: pointer; text-decoration: underline dotted;">2 substrates"  
le below:CEBPB" style="cursor: pointer; text-decoration: underline dotted;">1 substrates"  
ble below:SUZ12 YY1 CDC25B FOXO3 CDK1 FOXM1" style="cursor: pointer; text-decoration: underline dotted;">5 substrates"  
ailable below:RELA SQSTM1" style="cursor: pointer; text-decoration: underline dotted;">2 substrates"  
able below:CALM1 HSPA1A" style="cursor: pointer; text-decoration: underline dotted;">2 substrates"  
ailable below:FOXH1 TRAF6" style="cursor: pointer; text-decoration: underline dotted;">2 substrates"  
ilable below:RB1 YY1 CDK1 FOXM1" style="cursor: pointer; text-decoration: underline dotted;">4 substrates"  
ailable below:CDC25B" style="cursor: pointer; text-decoration: underline dotted;">1 substrates"  
le below:FOXO3" style="cursor: pointer; text-decoration: underline dotted;">1 substrates"  
ole below:JUN" style="cursor: pointer; text-decoration: underline dotted;">1 substrates"  
ible below:FOXM1 CDK1" style="cursor: pointer; text-decoration: underline dotted;">2 substrates"  
able below:SP1 EZH2" style="cursor: pointer; text-decoration: underline dotted;">2 substrates"  
lable below:NCOR2" style="cursor: pointer; text-decoration: underline dotted;">1 substrates"  
le below:FOS" style="cursor: pointer; text-decoration: underline dotted;">1 substrates"  
is available below:FOXO1" style="cursor: pointer; text-decoration: underline dotted;">1 substrates"  
available below:AKT1 MAPK8" style="cursor: pointer; text-decoration: underline dotted;">2 substrates"  
le below:RELA" style="cursor: pointer; text-decoration: underline dotted;">1 substrates"  
le below:FOXO1" style="cursor: pointer; text-decoration: underline dotted;">1 substrates"  
ble below:STAT3 EZH2" style="cursor: pointer; text-decoration: underline dotted;">2 substrates"  
ble below:JUN" style="cursor: pointer; text-decoration: underline dotted;">1 substrates"  
available below:FOXO1 CDK1" style="cursor: pointer; text-decoration: underline dotted;">2 substrates"  
able below:FOS VAV1" style="cursor: pointer; text-decoration: underline dotted;">2 substrates"  
is available below:ETS1 FOS" style="cursor: pointer; text-decoration: underline dotted;">2 substrates"  
ailable below:FOS JUN" style="cursor: pointer; text-decoration: underline dotted;">2 substrates"  
ble below:FOS" style="cursor: pointer; text-decoration: underline dotted;">1 substrates"  
is available below:CAV1" style="cursor: pointer; text-decoration: underline dotted;">1 substrates"  
ible below:RB1" style="cursor: pointer; text-decoration: underline dotted;">1 substrates"  
is available below:AR RELA" style="cursor: pointer; text-decoration: underline dotted;">2 substrates"  
ilable below:AKT1" style="cursor: pointer; text-decoration: underline dotted;">1 substrates"  
ble below:GSK3B AES" style="cursor: pointer; text-decoration: underline dotted;">2 substrates"  
s is available below:ETS1 CEBPB" style="cursor: pointer; text-decoration: underline dotted;">2 substrates"  
ailable below:SMAD3" style="cursor: pointer; text-decoration: underline dotted;">1 substrates"  
ailable below:UXT CALM1 STUB1 HSPA1A" style="cursor: pointer; text-decoration: underline dotted;">4 subst  
le below:DAXX SP1 PML" style="cursor: pointer; text-decoration: underline dotted;">3 substrates"  
le below:STAT3" style="cursor: pointer; text-decoration: underline dotted;">1 substrates"  
ible below:FOXO3 FOXO1" style="cursor: pointer; text-decoration: underline dotted;">2 substrates"  
available below:AKT1 CDC25B" style="cursor: pointer; text-decoration: underline dotted;">2 substrates"  
ailable below:GSK3B CDK1" style="cursor: pointer; text-decoration: underline dotted;">2 substrates"  
lable below:GSK3B" style="cursor: pointer; text-decoration: underline dotted;">1 substrates"  
ilable below:FHL2" style="cursor: pointer; text-decoration: underline dotted;">1 substrates"  
ble below:TCF7L2" style="cursor: pointer; text-decoration: underline dotted;">1 substrates"  
ilable below:RUNX1" style="cursor: pointer; text-decoration: underline dotted;">1 substrates"  
ilable below:AKT1" style="cursor: pointer; text-decoration: underline dotted;">1 substrates"

able below:AKT1" style="cursor: pointer; text-decoration: underline dotted; ">1 substrates"  
le below:SPIB VAV1" style="cursor: pointer; text-decoration: underline dotted; ">2 substrates"  
lable below:AKT1 JUN" style="cursor: pointer; text-decoration: underline dotted; ">2 substrates"  
ble below:VAV1 STAT3" style="cursor: pointer; text-decoration: underline dotted; ">2 substrates"  
le below:AKT1" style="cursor: pointer; text-decoration: underline dotted; ">1 substrates"  
lable below:MED1" style="cursor: pointer; text-decoration: underline dotted; ">1 substrates"  
lable below:CALM1" style="cursor: pointer; text-decoration: underline dotted; ">1 substrates"  
able below:FOXH1" style="cursor: pointer; text-decoration: underline dotted; ">1 substrates"  
able below:FOXH1" style="cursor: pointer; text-decoration: underline dotted; ">1 substrates"  
ailable below:GSK3B" style="cursor: pointer; text-decoration: underline dotted; ">1 substrates"  
ilable below:SMAD1" style="cursor: pointer; text-decoration: underline dotted; ">1 substrates"  
able below:CDK1" style="cursor: pointer; text-decoration: underline dotted; ">1 substrates"  
lable below:AKT1" style="cursor: pointer; text-decoration: underline dotted; ">1 substrates"  
able below:SP1" style="cursor: pointer; text-decoration: underline dotted; ">1 substrates"  
ible below:GATA2" style="cursor: pointer; text-decoration: underline dotted; ">1 substrates"  
lable below:FOS" style="cursor: pointer; text-decoration: underline dotted; ">1 substrates"  
ailable below:FOS" style="cursor: pointer; text-decoration: underline dotted; ">1 substrates"  
ble below:FOXH1" style="cursor: pointer; text-decoration: underline dotted; ">1 substrates"  
ilable below:SMARCA4" style="cursor: pointer; text-decoration: underline dotted; ">1 substrates"  
able below:AES" style="cursor: pointer; text-decoration: underline dotted; ">1 substrates"  
available below:RNF14" style="cursor: pointer; text-decoration: underline dotted; ">1 substrates"  
lable below:AR CAV1" style="cursor: pointer; text-decoration: underline dotted; ">2 substrates"  
ible below:PML" style="cursor: pointer; text-decoration: underline dotted; ">1 substrates"  
ble below:RUNX1" style="cursor: pointer; text-decoration: underline dotted; ">1 substrates"  
able below:FOXH1" style="cursor: pointer; text-decoration: underline dotted; ">1 substrates"  
ble below:ETS1" style="cursor: pointer; text-decoration: underline dotted; ">1 substrates"  
ible below:GSK3B" style="cursor: pointer; text-decoration: underline dotted; ">1 substrates"  
ailable below:JUN" style="cursor: pointer; text-decoration: underline dotted; ">1 substrates"  
ailable below:HSPA1A" style="cursor: pointer; text-decoration: underline dotted; ">1 substrates"  
able below:DAXX" style="cursor: pointer; text-decoration: underline dotted; ">1 substrates"  
ailable below:MAPK8" style="cursor: pointer; text-decoration: underline dotted; ">1 substrates"  
able below:TRAF6" style="cursor: pointer; text-decoration: underline dotted; ">1 substrates"  
available below:TCF3" style="cursor: pointer; text-decoration: underline dotted; ">1 substrates"  
ailable below:FOXO3" style="cursor: pointer; text-decoration: underline dotted; ">1 substrates"  
ble below:NCOR2" style="cursor: pointer; text-decoration: underline dotted; ">1 substrates"  
ailable below:AKT1" style="cursor: pointer; text-decoration: underline dotted; ">1 substrates"  
ailable below:SMARCA4" style="cursor: pointer; text-decoration: underline dotted; ">1 substrates"  
able below:CDK1" style="cursor: pointer; text-decoration: underline dotted; ">1 substrates"  
ailable below:CALM1 STAT3 HSPA1A" style="cursor: pointer; text-decoration: underline dotted; ">3 substrates"  
lable below:SMARCA4" style="cursor: pointer; text-decoration: underline dotted; ">1 substrates"  
le below:FOS" style="cursor: pointer; text-decoration: underline dotted; ">1 substrates"  
available below:RELA" style="cursor: pointer; text-decoration: underline dotted; ">1 substrates"  
ible below:SQSTM1" style="cursor: pointer; text-decoration: underline dotted; ">1 substrates"  
lable below:SIRT1" style="cursor: pointer; text-decoration: underline dotted; ">1 substrates"  
le below:JUN" style="cursor: pointer; text-decoration: underline dotted; ">1 substrates"  
available below:RELA" style="cursor: pointer; text-decoration: underline dotted; ">1 substrates"  
ailable below:AKT1" style="cursor: pointer; text-decoration: underline dotted; ">1 substrates"



available below:DNMT1" style="cursor: pointer; text-decoration: underline dotted;">1 substrates"  
available below:SUMO1" style="cursor: pointer; text-decoration: underline dotted;">1 substrates"  
available below:ETS1 NCOR2" style="cursor: pointer; text-decoration: underline dotted;">2 substrates"  
available below:GSK3B" style="cursor: pointer; text-decoration: underline dotted;">1 substrates"  
available below:AKT1" style="cursor: pointer; text-decoration: underline dotted;">1 substrates"  
available below:CAV1 GSK3B" style="cursor: pointer; text-decoration: underline dotted;">2 substrates"  
available below:ETS1" style="cursor: pointer; text-decoration: underline dotted;">1 substrates"  
available below:AR" style="cursor: pointer; text-decoration: underline dotted;">1 substrates"  
available below:CDK1" style="cursor: pointer; text-decoration: underline dotted;">1 substrates"  
available below:CAV1" style="cursor: pointer; text-decoration: underline dotted;">1 substrates"  
available below:OTUB1" style="cursor: pointer; text-decoration: underline dotted;">1 substrates"  
available below:SPI1" style="cursor: pointer; text-decoration: underline dotted;">1 substrates"  
available below:PRKG1" style="cursor: pointer; text-decoration: underline dotted;">1 substrates"  
is available below:RARA" style="cursor: pointer; text-decoration: underline dotted;">1 substrates"  
available below:JUN" style="cursor: pointer; text-decoration: underline dotted;">1 substrates"  
available below:STAT3" style="cursor: pointer; text-decoration: underline dotted;">1 substrates"  
is available below:SP1" style="cursor: pointer; text-decoration: underline dotted;">1 substrates"  
available below:CDK1" style="cursor: pointer; text-decoration: underline dotted;">1 substrates"  
available below:AKT1 DAXX AR SET JUN EZH2 CTCF SIRT1 CRYAB STAT3 YY1 SQSTM1 KPNB1 FOXO3 FOXO1 MDM4  
available below:TRIM28 RUNX1 AR TP53 SMAD2 SMAD1 SMAD3 CAV1 SIAH2 MDM4 CHD8 PHF1 MECP2 SUMO1  
available below:AR JUN EZH2 CTCF SIRT1 STAT3 SQSTM1 KPNB1 FOXO3 FOXO1 SP1 MDM4 NFE2L2 UHRF1 STUB1  
available below:AKT1 AR JUN EZH2 CTCF CRYAB STAT3 YY1 SQSTM1 FOXO3 FOXO1 SP1 MDM4 NFE2L2 TP53 SMC3  
available below:RB1 SMC3 SKP2 WDR77 TP53 DNMT1 FOXO1 SMAD2 JUN SMAD3 SP1 MDM4 CDKN1A CHD8 SUMO1  
available below:AKT1 RUNX1 AR TP53 JUN TOP2A CDKN1A SREBF1 STAT3 ETS1 FOXO3 FOXO1 SMAD2 SMAD4 SIRT1  
available below:RB1 AKT1 AR JUN SNAI1 EZH2 CDKN1A TGFB1I1 NCOR2 STAT3 FOXO3 FOXO1 SP1 CDK1 CEBPA CEBPB  
available below:SET JUN MECP2 SP1 UHRF1 SMARCC1 TP53 SMARCA4 SREBF1 RELA ETS1 CAV1 SMC3 SNAI1 CDK1  
available below:SET JUN DDB2 SP1 UHRF1 TRIM28 SMARCC1 TP53 SMARCA4 SREBF1 CAV1 RNF4 SMC3 WDR77 CDK1  
available below:RB1 TRIM28 SKP2 AR TP53 RAD21 JUN ATM EZH2 TOP2A TOP2B CDKN1A XPO1 SREBF1 PARP1 NFKBIA  
available below:AKT1 AR TP53 DNMT1 FOXO3 FOXO1 SMAD1 JUN SMAD3 SNAI1 GSK3B PHF1 HNF4A SREBF1  
available below:SOX2 TRIM28 AKT1 TP53 SMAD2 JUN SMAD4 SP1 ATM TOP2B PARP1 SMC1A RELA MAPK9 MAPK8  
available below:RB1 AKT1 TP53 JUN SMARCA4 TOP2A NCOR2 RELA NPM1 YY1 NCL VDR NFKBIA SP1 CDK1 SUZ12  
available below:ETS1 AR SQSTM1 TP53 SMAD2 SMAD1 JUN SMAD4 SMAD3 SP1 SREBF1 NCOR2 CEBPB RELA MAPK9  
available below:RB1 ETS1 AR TP53 SMAD2 SMAD1 JUN SMAD4 SMAD3 SP1 SREBF1 NCOR2 CEBPB RELA MAPK7 STK11  
available below:SOX2 AKT1 AR TP53 JUN EZH2 CDKN1A NCOR1 STAT3 SKI PIAS2 KAT6A DNMT1 FOXO3 FOXO1 SMAD3  
available below:AR TP53 JUN TOP2A TOP2B CDKN1A TCF20 CTCF HNF4A NCOR2 STAT3 KPNA4 FOXO3 SMAD3  
available below:CDKN1A HNF4A SIRT1 RUNX1 TP53 RELA MAPK8 SMAD2 JUN SMAD3 STAT3 SP1" style="cursor: pointer; text-decoration: underline dotted;">1 substrates"  
available below:AKT1 SKP2 SMARCC1 AR TP53 EZH2 CDKN1A NCOR2 RELA NPM1 FOXO3 FOXO1 SMAD2 SMAD4  
available below:SOX2 RUNX1 AR TP53 JUN CDKN1A SREBF1 SIRT1 SUZ12 STAT3 FOXO3 NFKBIA SP1 CDK1 NFE2L2  
available below:RB1 SMARCB1 SMC3 SOX2 TRIM28 DAXX TP53 SMARCA4 ATM EZH2 PARP1 SMAD1 SP1 CDK1 MDM4  
available below:GSK3B HNF4A AKT1 SREBF1 PARP1 TP53 FOXO3 FOXO1 JUN" style="cursor: pointer; text-decoration: underline dotted;">1 substrates"  
available below:FOXO3 RELA AKT1 STAT3 NFKBIA IRF7 SQSTM1 TP53" style="cursor: pointer; text-decoration: underline dotted;">1 substrates"  
available below:TOP2A AKT1 HDAC2 RELA MAPK9 JUN VDR NFKBIA CDK1" style="cursor: pointer; text-decoration: underline dotted;">1 substrates"  
available below:FOXO3 RELA NCOR2 NFKBIA IRF7 AKT1" style="cursor: pointer; text-decoration: underline dotted;">1 substrates"  
available below:AKT1 RUNX1 AR TP53 JUN CDKN1A STAT3 CAV1 SMAD7 NFKBIA CDK1 GSK3B MAPK9" style="cursor: pointer; text-decoration: underline dotted;">1 substrates"  
available below:TGFB1I1 TP53 SMAD2 SMAD3 CAV1 PML SP1 SNAI1" style="cursor: pointer; text-decoration: underline dotted;">1 substrates"  
available below:RB1 TP53 JUN CAV1 NFKBIA MDM4 CDKN1A CEBPB HDAC2 STAT3 HIPK2" style="cursor: pointer; text-decoration: underline dotted;">1 substrates"  
available below:CDKN1A YBX1 SQSTM1 TP53 KPNB1 FOXO1 RELA MDM4" style="cursor: pointer; text-decoration: underline dotted;">1 substrates"

available below:TOP2A GSK3B AKT1 NCOR1 TP53 HDAC3 NFKBIA CDK1" style="cursor: pointer; text-decoration: underline dotted;";>4 substrates

available below:SMC3 SOX2 AR TP53 JUN CDK1 TOP2A CDKN1A PRMT1 NPM1" style="cursor: pointer; text-decoration: underline dotted;";>4 substrates

available below:NCL TP53 DNMT1 SET SIAH2 SMARCA4 SNAI1" style="cursor: pointer; text-decoration: underline dotted;";>4 substrates

available below:TRIM28 SQSTM1 TP53 JUN CAV1 NFE2L2 GSK3B CDKN1A MAPK8 STAT3" style="cursor: pointer; text-decoration: underline dotted;";>4 substrates

available below:RB1 SOX2 TRIM28 SKP2 TP53 EZH2 TOP2A CDKN1A CDK1 MDM4 YBX1 SIN3A" style="cursor: pointer; text-decoration: underline dotted;";>4 substrates

available below:RB1 AR TP53 DNMT1 FOXO1 ATM NFE2L2 GSK3B CDKN1A STAT3 STUB1" style="cursor: pointer; text-decoration: underline dotted;";>4 substrates

available below:SMAD2 SMAD4 SMAD3 SMAD7 TP53" style="cursor: pointer; text-decoration: underline dotted;";>4 substrates

available below:AKT1 AR JUN CRYAB STAT3 SQSTM1 NFE2L2 STUB1 TP53 HNF4A RELA VDR CAV1 GSK3B RB1 HOXA10" style="cursor: pointer; text-decoration: underline dotted;";>4 substrates

available below:GSK3B CDKN1A FOXO3 FOXO1 RELA AKT1" style="cursor: pointer; text-decoration: underline dotted;";>4 substrates

is available below:GSK3B CDKN1A FOXO3 FOXO1 RELA" style="cursor: pointer; text-decoration: underline dotted;";>4 substrates

available below:RB1 CEBPA CDKN1A NPM1 RUNX1" style="cursor: pointer; text-decoration: underline dotted;";>4 substrates

available below:RB1 TRIM28 TP53 SIAH2 PML MDM4" style="cursor: pointer; text-decoration: underline dotted;";>4 substrates

available below:RB1 RELA SMAD2 JUN TP53" style="cursor: pointer; text-decoration: underline dotted;";>4 substrates

available below:CDKN1A SKP2 AR UHRF1 FOXO3 RELA" style="cursor: pointer; text-decoration: underline dotted;";>4 substrates

available below:RB1 SQSTM1 TP53 FOXO3 FOXO1 NFE2L2 HNF4A SREBF1" style="cursor: pointer; text-decoration: underline dotted;";>4 substrates

available below:GSK3B YBX1 TP53 CEBPB MAPK7 JUN NFKBIA" style="cursor: pointer; text-decoration: underline dotted;";>4 substrates

available below:GSK3B AKT1 PIAS4 RELA MAPK7 STAT3 SP1" style="cursor: pointer; text-decoration: underline dotted;";>4 substrates

available below:RB1 AKT1 AR JUN CDKN1A STAT3 HIPK2 CDK1 CEBPB RUNX1 TP53 TOP2A HNF4A SMAD3 CAV1 SMAD4" style="cursor: pointer; text-decoration: underline dotted;";>4 substrates

available below:AR JUN CRYAB STAT3 FOXO3 UHRF1 TP53 HNF4A SREBF1 RELA ETS1 VDR CAV1 GSK3B RB1 SNAI1" style="cursor: pointer; text-decoration: underline dotted;";>4 substrates

available below:NPM1 STAT3 NFKBIA IRF7 TP53" style="cursor: pointer; text-decoration: underline dotted;";>4 substrates

available below:SMC3 TP53 RAD21 TOP2A CDKN1A XPO1 SUZ12 NPM1 YY1 FOXO3 CDK1 SMC1A" style="cursor: pointer; text-decoration: underline dotted;";>4 substrates

available below:CDKN1A CEBPB RELA SNAI1" style="cursor: pointer; text-decoration: underline dotted;";>4 substrates

available below:AKT1 SKP2 TP53 ATM CDKN1A RELA MAPK8" style="cursor: pointer; text-decoration: underline dotted;";>4 substrates

available below:AKT1 IRF7 SQSTM1 RELA STAT3 NFKBIA" style="cursor: pointer; text-decoration: underline dotted;";>4 substrates

available below:AKT1 BTRC IRF7 FOXO3 RELA NFKBIA" style="cursor: pointer; text-decoration: underline dotted;";>4 substrates

available below:BTRC NCOR2 NCOR1 FOXO3 RELA NFKBIA" style="cursor: pointer; text-decoration: underline dotted;";>4 substrates

available below:RB1 GSK3B TP53 JUN ATM MDM4" style="cursor: pointer; text-decoration: underline dotted;";>4 substrates

available below:DAXX TP53 SP1 ATM SMC1A NPM1 PML" style="cursor: pointer; text-decoration: underline dotted;";>4 substrates

available below:RB1 SMAD1 SMAD3 TP53" style="cursor: pointer; text-decoration: underline dotted;";>4 substrates

available below:XPO1 TP53 MAPK9 MAPK8 JUN" style="cursor: pointer; text-decoration: underline dotted;";>4 substrates

available below:NCL HDAC2 RELA JUN NFKBIA" style="cursor: pointer; text-decoration: underline dotted;";>4 substrates

available below:MAPK9 MAPK8 AKT1 STAT3" style="cursor: pointer; text-decoration: underline dotted;";>4 substrates

available below:RB1 AKT1 AR TP53 PRKG1 PARP1 MAPK7" style="cursor: pointer; text-decoration: underline dotted;";>4 substrates

available below:TOP2A JUN NPM1 TP53" style="cursor: pointer; text-decoration: underline dotted;";>4 substrates

available below:JUN SIAH2 STAT3 TP53" style="cursor: pointer; text-decoration: underline dotted;";>4 substrates

available below:FOXO1 SIRT1 RUNX1 TP53" style="cursor: pointer; text-decoration: underline dotted;";>4 substrates

available below:GSK3B AKT1 PRKG1 FOXO3 FOXO1" style="cursor: pointer; text-decoration: underline dotted;";>4 substrates

available below:NCOR2 RELA" style="cursor: pointer; text-decoration: underline dotted;";>2 substrates

available below:FOXO1 HNF4A SMAD4 STAT3" style="cursor: pointer; text-decoration: underline dotted;";>4 substrates

available below:TOP2A AR TP53 SMAD1 CDK1" style="cursor: pointer; text-decoration: underline dotted;";>4 substrates

available below:DAXX MECP2 KAT6A" style="cursor: pointer; text-decoration: underline dotted;";>3 substrates

available below:RB1 TOP2A XPO1 NPM1 CDK1" style="cursor: pointer; text-decoration: underline dotted;";>4 substrates

available below:CEBPB TP53" style="cursor: pointer; text-decoration: underline dotted;";>2 substrates

available below:SMAD2 SMAD1 SMAD4 SMAD3" style="cursor: pointer; text-decoration: underline dotted;";>4 substrates

available below:AKT1 DAXX MAPK9 MAPK8" style="cursor: pointer; text-decoration: underline dotted;";>4 substrates

available below:GSK3B CDKN1A AR TP53 SKI" style="cursor: pointer; text-decoration: underline dotted;";>4 substrates

available below:TP53 FOXO1 CDK1 MDM4" style="cursor: pointer; text-decoration: underline dotted;";>4 substrates

able below:JUN TP53" style="cursor: pointer; text-decoration: underline dotted;">2 substrates"  
ible below:TOP2A NPM1 NCL" style="cursor: pointer; text-decoration: underline dotted;">3 substrates"  
ible below:SMAD1 SMAD3 STAT3" style="cursor: pointer; text-decoration: underline dotted;">3 substrates"  
able below:SMARCC1 PARP1 FOXO3 RELA NFKBIA" style="cursor: pointer; text-decoration: underline dotted;">  
ilable below:CDKN1A TP53 JUN STAT3 NFKBIA" style="cursor: pointer; text-decoration: underline dotted;">5 s  
ilable below:SMAD2 SMAD1 SMAD4" style="cursor: pointer; text-decoration: underline dotted;">3 substrates  
ilable below:ETS1 MAPK7 PML" style="cursor: pointer; text-decoration: underline dotted;">3 substrates"  
; is available below:TP53 FOXO1" style="cursor: pointer; text-decoration: underline dotted;">2 substrates"  
available below:TP53 CAV1 TOP2A GSK3B MAPK7 KLF5" style="cursor: pointer; text-decoration: underline dot  
ible below:RB1 CDKN1A JUN" style="cursor: pointer; text-decoration: underline dotted;">3 substrates"  
ailable below:RUNX1 CDK1 TP53" style="cursor: pointer; text-decoration: underline dotted;">3 substrates"  
ailable below:SMAD2 SMAD1 IRF7" style="cursor: pointer; text-decoration: underline dotted;">3 substrates"  
ble below:JUN TP53" style="cursor: pointer; text-decoration: underline dotted;">2 substrates"  
ible below:FOXO3 FOXO1 MAPK7 NFKBIA" style="cursor: pointer; text-decoration: underline dotted;">4 substr  
ailable below:CDKN1A MAPK8 DAXX" style="cursor: pointer; text-decoration: underline dotted;">3 substrates  
available below:PRKG1 SP1 TP53" style="cursor: pointer; text-decoration: underline dotted;">3 substrates"  
le below:RELA STAT3 TP53" style="cursor: pointer; text-decoration: underline dotted;">3 substrates"  
lable below:ETS1 AR CDK1 NCOR1 STAT3" style="cursor: pointer; text-decoration: underline dotted;">5 substr  
ilable below:RB1 YY1 TP53 CDK1 ATM TOP2A" style="cursor: pointer; text-decoration: underline dotted;">6 su  
able below:AKT1 SQSTM1 DNMT1 JUN STAT3" style="cursor: pointer; text-decoration: underline dotted;">5 s  
ilable below:SMAD2 SMAD3" style="cursor: pointer; text-decoration: underline dotted;">2 substrates"  
able below:SMAD4 AES TP53" style="cursor: pointer; text-decoration: underline dotted;">3 substrates"  
ilable below:FOXO3 PARP1 TP53" style="cursor: pointer; text-decoration: underline dotted;">3 substrates"  
ailable below:RELA TRIM28 STAT3" style="cursor: pointer; text-decoration: underline dotted;">3 substrates"  
ble below:TP53 JUN CAV1 NFKBIA" style="cursor: pointer; text-decoration: underline dotted;">4 substrates"  
ailable below:RELA SREBF1 SQSTM1" style="cursor: pointer; text-decoration: underline dotted;">3 substrates  
le below:CDKN1A AHR PRKG1 NFE2L2" style="cursor: pointer; text-decoration: underline dotted;">4 substrate  
ailable below:TP53 JUN HNF4A CEBPB PML" style="cursor: pointer; text-decoration: underline dotted;">5 sub  
ailable below:DNMT1 UHRF1 TP53" style="cursor: pointer; text-decoration: underline dotted;">3 substrates"  
lable below:AKT1" style="cursor: pointer; text-decoration: underline dotted;">1 substrates"  
ilable below:SMAD4" style="cursor: pointer; text-decoration: underline dotted;">1 substrates"  
ble below:SMAD4" style="cursor: pointer; text-decoration: underline dotted;">1 substrates"  
ailable below:AKT1" style="cursor: pointer; text-decoration: underline dotted;">1 substrates"  
available below:NCL NFKBIA YBX1 NPM1 STUB1" style="cursor: pointer; text-decoration: underline dotted;">5  
ilable below:FOXH1 AKT1" style="cursor: pointer; text-decoration: underline dotted;">2 substrates"  
lable below:AKT1 CEBPA CEBPB" style="cursor: pointer; text-decoration: underline dotted;">3 substrates"  
ailable below:SMARCA4 CDK1" style="cursor: pointer; text-decoration: underline dotted;">2 substrates"  
le below:GSK3B RELA" style="cursor: pointer; text-decoration: underline dotted;">2 substrates"  
ailable below:JUN NFKBIA" style="cursor: pointer; text-decoration: underline dotted;">2 substrates"  
ailable below:SREBF1 FOXO3" style="cursor: pointer; text-decoration: underline dotted;">2 substrates"  
able below:SREBF1 NCOR2" style="cursor: pointer; text-decoration: underline dotted;">2 substrates"  
ailable below:DDX17 SMARCA4" style="cursor: pointer; text-decoration: underline dotted;">2 substrates"  
ilable below:STAT3 AKT1" style="cursor: pointer; text-decoration: underline dotted;">2 substrates"  
ible below:AR JUN CAV1 ATM CDKN1A STAT3" style="cursor: pointer; text-decoration: underline dotted;">6 su  
ilable below:CDKN1A TP53" style="cursor: pointer; text-decoration: underline dotted;">2 substrates"  
ible below:SMAD1 TP53" style="cursor: pointer; text-decoration: underline dotted;">2 substrates"  
lable below:FOXH1 SMARCA4" style="cursor: pointer; text-decoration: underline dotted;">2 substrates"



ilable below:RAD21 DDX17" style="cursor: pointer; text-decoration: underline dotted;">2 substrates"  
ilable below:IRF7 OTUB1 SMAD2" style="cursor: pointer; text-decoration: underline dotted;">3 substrates"  
le below:TP53 CDK1 TOP2A XPO1" style="cursor: pointer; text-decoration: underline dotted;">4 substrates"  
ible below:JUN TP53" style="cursor: pointer; text-decoration: underline dotted;">2 substrates"  
e below:TGFB111 AKT1" style="cursor: pointer; text-decoration: underline dotted;">2 substrates"  
s available below:FOXO1 TP53" style="cursor: pointer; text-decoration: underline dotted;">2 substrates"  
ible below:AKT1 AR" style="cursor: pointer; text-decoration: underline dotted;">2 substrates"  
lable below:CDKN1A PRKG1 SMAD7" style="cursor: pointer; text-decoration: underline dotted;">3 substrates"  
available below:TRIM28 AKT1 TP53" style="cursor: pointer; text-decoration: underline dotted;">3 substrates"  
le below:TP53 JUN CAV1" style="cursor: pointer; text-decoration: underline dotted;">3 substrates"  
ailable below:CDKN1A CAV1" style="cursor: pointer; text-decoration: underline dotted;">2 substrates"  
able below:MAPK9 MAPK8" style="cursor: pointer; text-decoration: underline dotted;">2 substrates"  
able below:CDKN1A SNAI1" style="cursor: pointer; text-decoration: underline dotted;">2 substrates"  
available below:GSK3B SMAD4" style="cursor: pointer; text-decoration: underline dotted;">2 substrates"  
available below:TOP2A GSK3B CDK1" style="cursor: pointer; text-decoration: underline dotted;">3 substrates"  
able below:AKT1 TP53" style="cursor: pointer; text-decoration: underline dotted;">2 substrates"  
le below:AKT1 STAT3" style="cursor: pointer; text-decoration: underline dotted;">2 substrates"  
le below:STAT3 AR" style="cursor: pointer; text-decoration: underline dotted;">2 substrates"  
available below:FOXO3 TP53" style="cursor: pointer; text-decoration: underline dotted;">2 substrates"  
ailable below:GSK3B MAPK8 STAT3" style="cursor: pointer; text-decoration: underline dotted;">3 substrates"  
ble below:FOXO3 NFkBIA" style="cursor: pointer; text-decoration: underline dotted;">2 substrates"  
ble below:STAT3" style="cursor: pointer; text-decoration: underline dotted;">1 substrates"  
lable below:AKT1 JUN SNAI1" style="cursor: pointer; text-decoration: underline dotted;">3 substrates"  
ailable below:SQSTM1 TP53 JUN" style="cursor: pointer; text-decoration: underline dotted;">3 substrates"  
lable below:CDKN1A TP53" style="cursor: pointer; text-decoration: underline dotted;">2 substrates"  
ible below:AKT1 AR" style="cursor: pointer; text-decoration: underline dotted;">2 substrates"  
available below:ETS1 SMAD2 CDKN1A NCOR2" style="cursor: pointer; text-decoration: underline dotted;">4 sub  
ible below:TP53" style="cursor: pointer; text-decoration: underline dotted;">1 substrates"  
ible below:TP53" style="cursor: pointer; text-decoration: underline dotted;">1 substrates"  
lable below:AKT1" style="cursor: pointer; text-decoration: underline dotted;">1 substrates"  
lable below:CRYAB" style="cursor: pointer; text-decoration: underline dotted;">1 substrates"  
ilable below:GSK3B PHF1" style="cursor: pointer; text-decoration: underline dotted;">2 substrates"  
le below:TOP2A" style="cursor: pointer; text-decoration: underline dotted;">1 substrates"  
le below:CEBPB" style="cursor: pointer; text-decoration: underline dotted;">1 substrates"  
ailable below:MAPK9 MAPK8" style="cursor: pointer; text-decoration: underline dotted;">2 substrates"  
available below:TP53" style="cursor: pointer; text-decoration: underline dotted;">1 substrates"  
le below:FOXO3" style="cursor: pointer; text-decoration: underline dotted;">1 substrates"  
lable below:NCOR2" style="cursor: pointer; text-decoration: underline dotted;">1 substrates"  
lable below:SET ETS1" style="cursor: pointer; text-decoration: underline dotted;">2 substrates"  
ible below:CDKN1A TP53" style="cursor: pointer; text-decoration: underline dotted;">2 substrates"  
ible below:NPM1 CDK1" style="cursor: pointer; text-decoration: underline dotted;">2 substrates"  
le below:RELA" style="cursor: pointer; text-decoration: underline dotted;">1 substrates"  
ailable below:RELA" style="cursor: pointer; text-decoration: underline dotted;">1 substrates"  
ilable below:TP53" style="cursor: pointer; text-decoration: underline dotted;">1 substrates"  
le below:FOXO1" style="cursor: pointer; text-decoration: underline dotted;">1 substrates"  
able below:SP1 EZH2" style="cursor: pointer; text-decoration: underline dotted;">2 substrates"  
ible below:TP53 MAPK7" style="cursor: pointer; text-decoration: underline dotted;">2 substrates"

available below:DDX17 SQSTM1 SMAD3" style="cursor: pointer; text-decoration: underline dotted;">3 substrates"  
available below:TP53" style="cursor: pointer; text-decoration: underline dotted;">1 substrates"  
available below:ETS1 NOTCH4" style="cursor: pointer; text-decoration: underline dotted;">2 substrates"  
available below:AKT1 MAPK8" style="cursor: pointer; text-decoration: underline dotted;">2 substrates"  
available below:STAT3 EZH2" style="cursor: pointer; text-decoration: underline dotted;">2 substrates"  
available below:YY1 TRIM28 TP53 TOP2A" style="cursor: pointer; text-decoration: underline dotted;">4 substrates"  
available below:CAV1" style="cursor: pointer; text-decoration: underline dotted;">1 substrates"  
available below:RB1" style="cursor: pointer; text-decoration: underline dotted;">1 substrates"  
available below:AKT1" style="cursor: pointer; text-decoration: underline dotted;">1 substrates"  
available below:CRYAB" style="cursor: pointer; text-decoration: underline dotted;">1 substrates"  
available below:TOP2A CDK1" style="cursor: pointer; text-decoration: underline dotted;">2 substrates"  
available below:CDKN1A JUN" style="cursor: pointer; text-decoration: underline dotted;">2 substrates"  
available below:CAV1 NFKBIA" style="cursor: pointer; text-decoration: underline dotted;">2 substrates"  
available below:AR RELA" style="cursor: pointer; text-decoration: underline dotted;">2 substrates"  
available below:HNF4A AKT1" style="cursor: pointer; text-decoration: underline dotted;">2 substrates"  
available below:STAT3" style="cursor: pointer; text-decoration: underline dotted;">1 substrates"  
available below:GSK3B AES" style="cursor: pointer; text-decoration: underline dotted;">2 substrates"  
available below:ETS1 CEBPB" style="cursor: pointer; text-decoration: underline dotted;">2 substrates"  
available below:TP53" style="cursor: pointer; text-decoration: underline dotted;">1 substrates"  
available below:AKT1 FOXO1 SNAI1" style="cursor: pointer; text-decoration: underline dotted;">3 substrates"  
available below:SQSTM1" style="cursor: pointer; text-decoration: underline dotted;">1 substrates"  
available below:NPM1 CDK1" style="cursor: pointer; text-decoration: underline dotted;">2 substrates"  
available below:TP53" style="cursor: pointer; text-decoration: underline dotted;">1 substrates"  
available below:GSK3B" style="cursor: pointer; text-decoration: underline dotted;">1 substrates"  
available below:FHL2" style="cursor: pointer; text-decoration: underline dotted;">1 substrates"  
available below:KPNB1" style="cursor: pointer; text-decoration: underline dotted;">1 substrates"  
available below:RUNX1" style="cursor: pointer; text-decoration: underline dotted;">1 substrates"  
available below:XPO1" style="cursor: pointer; text-decoration: underline dotted;">1 substrates"  
available below:AKT1" style="cursor: pointer; text-decoration: underline dotted;">1 substrates"  
available below:AKT1" style="cursor: pointer; text-decoration: underline dotted;">1 substrates"  
available below:AKT1" style="cursor: pointer; text-decoration: underline dotted;">1 substrates"  
available below:KAT6A" style="cursor: pointer; text-decoration: underline dotted;">1 substrates"  
available below:FOXH1" style="cursor: pointer; text-decoration: underline dotted;">1 substrates"  
available below:FOXH1" style="cursor: pointer; text-decoration: underline dotted;">1 substrates"  
available below:SMAD2" style="cursor: pointer; text-decoration: underline dotted;">1 substrates"  
available below:GSK3B" style="cursor: pointer; text-decoration: underline dotted;">1 substrates"  
available below:SMAD1" style="cursor: pointer; text-decoration: underline dotted;">1 substrates"  
available below:CDK1" style="cursor: pointer; text-decoration: underline dotted;">1 substrates"  
available below:AKT1" style="cursor: pointer; text-decoration: underline dotted;">1 substrates"  
available below:SP1" style="cursor: pointer; text-decoration: underline dotted;">1 substrates"  
available below:TOP2A" style="cursor: pointer; text-decoration: underline dotted;">1 substrates"  
available below:SNAI1" style="cursor: pointer; text-decoration: underline dotted;">1 substrates"  
available below:FOXH1" style="cursor: pointer; text-decoration: underline dotted;">1 substrates"  
available below:SMARCA4" style="cursor: pointer; text-decoration: underline dotted;">1 substrates"  
available below:AES" style="cursor: pointer; text-decoration: underline dotted;">1 substrates"  
available below:TP53" style="cursor: pointer; text-decoration: underline dotted;">1 substrates"  
available below:PML" style="cursor: pointer; text-decoration: underline dotted;">1 substrates"

ble below:RUNX1" style="cursor: pointer; text-decoration: underline dotted;">1 substrates"  
ilable below:SET" style="cursor: pointer; text-decoration: underline dotted;">1 substrates"  
able below:FOXH1" style="cursor: pointer; text-decoration: underline dotted;">1 substrates"  
ble below:ETS1" style="cursor: pointer; text-decoration: underline dotted;">1 substrates"  
ible below:GSK3B" style="cursor: pointer; text-decoration: underline dotted;">1 substrates"  
le below:TOP2A TGFB11 CAV1 NFE2L2" style="cursor: pointer; text-decoration: underline dotted;">4 substrates"  
ailable below:MAPK8" style="cursor: pointer; text-decoration: underline dotted;">1 substrates"  
ible below:TP53" style="cursor: pointer; text-decoration: underline dotted;">1 substrates"  
ble below:ATM" style="cursor: pointer; text-decoration: underline dotted;">1 substrates"  
ailable below:AKT1" style="cursor: pointer; text-decoration: underline dotted;">1 substrates"  
able below:CDK1" style="cursor: pointer; text-decoration: underline dotted;">1 substrates"  
ible below:SMAD2 JUN" style="cursor: pointer; text-decoration: underline dotted;">2 substrates"  
lable below:SMARCA4" style="cursor: pointer; text-decoration: underline dotted;">1 substrates"  
available below:RELA" style="cursor: pointer; text-decoration: underline dotted;">1 substrates"  
ailable below:MAPK7" style="cursor: pointer; text-decoration: underline dotted;">1 substrates"  
le below:SQSTM1" style="cursor: pointer; text-decoration: underline dotted;">1 substrates"  
lable below:SIRT1" style="cursor: pointer; text-decoration: underline dotted;">1 substrates"  
lable below:NFKBIA" style="cursor: pointer; text-decoration: underline dotted;">1 substrates"  
lable below:AR CAV1" style="cursor: pointer; text-decoration: underline dotted;">2 substrates"  
le below:JUN" style="cursor: pointer; text-decoration: underline dotted;">1 substrates"  
available below:RELA" style="cursor: pointer; text-decoration: underline dotted;">1 substrates"  
ailable below:AKT1" style="cursor: pointer; text-decoration: underline dotted;">1 substrates"  
ible below:ETS1" style="cursor: pointer; text-decoration: underline dotted;">1 substrates"  
ible below:CDKN1A" style="cursor: pointer; text-decoration: underline dotted;">1 substrates"  
lable below:SMARCA4" style="cursor: pointer; text-decoration: underline dotted;">1 substrates"  
available below:GSK3B" style="cursor: pointer; text-decoration: underline dotted;">1 substrates"  
ble below:JUN" style="cursor: pointer; text-decoration: underline dotted;">1 substrates"  
lable below:RUNX1" style="cursor: pointer; text-decoration: underline dotted;">1 substrates"  
ailable below:GSK3B" style="cursor: pointer; text-decoration: underline dotted;">1 substrates"  
ailable below:TP53 JUN" style="cursor: pointer; text-decoration: underline dotted;">2 substrates"  
ble below:GSK3B" style="cursor: pointer; text-decoration: underline dotted;">1 substrates"  
ible below:GSK3B" style="cursor: pointer; text-decoration: underline dotted;">1 substrates"  
able below:STAT3" style="cursor: pointer; text-decoration: underline dotted;">1 substrates"  
able below:CDK1" style="cursor: pointer; text-decoration: underline dotted;">1 substrates"  
ble below:EZH2" style="cursor: pointer; text-decoration: underline dotted;">1 substrates"  
ailable below:CDKN1A" style="cursor: pointer; text-decoration: underline dotted;">1 substrates"  
ble below:TP53" style="cursor: pointer; text-decoration: underline dotted;">1 substrates"  
lable below:FOXH1" style="cursor: pointer; text-decoration: underline dotted;">1 substrates"  
ble below:AKT1" style="cursor: pointer; text-decoration: underline dotted;">1 substrates"  
ilable below:RELA" style="cursor: pointer; text-decoration: underline dotted;">1 substrates"  
ible below:SMAD2" style="cursor: pointer; text-decoration: underline dotted;">1 substrates"  
lable below:TGFB11" style="cursor: pointer; text-decoration: underline dotted;">1 substrates"  
lable below:GSK3B" style="cursor: pointer; text-decoration: underline dotted;">1 substrates"  
ble below:ETS1" style="cursor: pointer; text-decoration: underline dotted;">1 substrates"  
ble below:ETS1" style="cursor: pointer; text-decoration: underline dotted;">1 substrates"  
ible below:AKT1" style="cursor: pointer; text-decoration: underline dotted;">1 substrates"  
le below:RUNX1" style="cursor: pointer; text-decoration: underline dotted;">1 substrates"

able below:CRYAB" style="cursor: pointer; text-decoration: underline dotted;">1 substrates"  
able below:STAT3" style="cursor: pointer; text-decoration: underline dotted;">1 substrates"  
lable below:TP53" style="cursor: pointer; text-decoration: underline dotted;">1 substrates"  
ble below:NPM1" style="cursor: pointer; text-decoration: underline dotted;">1 substrates"  
lable below:STAT3" style="cursor: pointer; text-decoration: underline dotted;">1 substrates"  
le below:PML" style="cursor: pointer; text-decoration: underline dotted;">1 substrates"  
lable below:FOXH1" style="cursor: pointer; text-decoration: underline dotted;">1 substrates"  
e below:ETS1" style="cursor: pointer; text-decoration: underline dotted;">1 substrates"  
ble below:SQSTM1" style="cursor: pointer; text-decoration: underline dotted;">1 substrates"  
le below:CAV1" style="cursor: pointer; text-decoration: underline dotted;">1 substrates"  
s available below:STAT3" style="cursor: pointer; text-decoration: underline dotted;">1 substrates"  
e below:STAT3" style="cursor: pointer; text-decoration: underline dotted;">1 substrates"  
ailable below:GADD45GIP1" style="cursor: pointer; text-decoration: underline dotted;">1 substrates"  
ble below:CEBPB" style="cursor: pointer; text-decoration: underline dotted;">1 substrates"  
able below:PML" style="cursor: pointer; text-decoration: underline dotted;">1 substrates"  
ole below:PARP1" style="cursor: pointer; text-decoration: underline dotted;">1 substrates"  
available below:AR RELA" style="cursor: pointer; text-decoration: underline dotted;">2 substrates"  
ailable below:FOXH1" style="cursor: pointer; text-decoration: underline dotted;">1 substrates"  
ble below:SUMO1" style="cursor: pointer; text-decoration: underline dotted;">1 substrates"  
lable below:GSK3B" style="cursor: pointer; text-decoration: underline dotted;">1 substrates"  
lable below:AKT1" style="cursor: pointer; text-decoration: underline dotted;">1 substrates"  
available below:AR" style="cursor: pointer; text-decoration: underline dotted;">1 substrates"  
able below:TOP2A" style="cursor: pointer; text-decoration: underline dotted;">1 substrates"  
is available below:ETS1" style="cursor: pointer; text-decoration: underline dotted;">1 substrates"  
ailable below:NCL STAT3" style="cursor: pointer; text-decoration: underline dotted;">2 substrates"  
ble below:STAT3" style="cursor: pointer; text-decoration: underline dotted;">1 substrates"  
is available below:TOP2A" style="cursor: pointer; text-decoration: underline dotted;">1 substrates"  
le below:TP53 NFKBIA" style="cursor: pointer; text-decoration: underline dotted;">2 substrates"  
lable below:STAT3" style="cursor: pointer; text-decoration: underline dotted;">1 substrates"  
s available below:SP1" style="cursor: pointer; text-decoration: underline dotted;">1 substrates"  
ailable below:UXT STUB1" style="cursor: pointer; text-decoration: underline dotted;">2 substrates"  
able below:DAXX" style="cursor: pointer; text-decoration: underline dotted;">1 substrates"

MDM4 SUMO1 SIN3A CHUK PARP1 PAX6 SIRT1 NCOR1 HDAC4 CEBPB RCHY1 RELA PML ASX  
TM1 FOXO1 PIN1 MDM4 SUMO1 HSP90AA1 UHRF1 E2F1 GADD45GIP1 STUB1 TRIM28 SMARCC  
3P1 MDM4 NFE2L2 HSP90AA1 UHRF1 E2F1 E2F4 STUB1 TRIM28 SMARCC1 SMARCA4 SNW1 H  
P1 MDM4 NFE2L2 HSP90AA1 E2F1 SMARCA4 HNF4A RELA DDX5 CAV1 GSK3B VHL RB1 MYC I  
KN1A SUMO1 HSP90AA1 PARP1 RBL1 MYOD1 CEBPA CEBPB CDKN2A STAT3 PPP1CA" style="c  
/HSC1 REST CDKN1A NCOR2 NCOR1 CDKN2A HDAC4 CEBPA CEBPB PML ASXL1 KAT5 SETDI  
STAT3 PPP1CA SKI PIAS2 FOXO4 FOXO1 SMAD4 SMAD3 ESR1 SP1 MDM4 KDM5A GSK3B C  
RELA FOXO4 FOXO1 SMAD2 SMAD3 ESR1 NFKB1 MDM4 GSK3B HSP90AA1 CHUK MYOD1" styl  
V1 WHSC1 MYOD1 RNF4 REST PHB2 WDR77 CDKN1A NCOR2 CDKN2A USP7 CEBPB HDAC2 F  
NFKB1 SP1 NCOR2 HDAC4 CEBPB RELA STAT3" style="cursor: pointer; text-decoration: underline  
STAT3 FBXW7 FOXO1 SP1 CHUK CEBPA CEBPB PML SKP2 HIST1H3A PARP1 RELA SMAD2 S  
PIN1 GSK3B HNF4A PARP1 CEBPB E2F1 STAT3" style="cursor: pointer; text-decoration: underline  
NFKB1 SP1" style="cursor: pointer; text-decoration: underline dotted;">13 substrates"  
HDAC4 CEBPB RELA STAT3" style="cursor: pointer; text-decoration: underline dotted;">16 substr  
D3 CAV1 ESR1 SP1 GSK3B CHUK CEBPA CEBPB E2F4 PML STUB1" style="cursor: pointer; text-c  
P1CA SP1" style="cursor: pointer; text-decoration: underline dotted;">11 substrates"  
CEBPB HDAC2 STAT3" style="cursor: pointer; text-decoration: underline dotted;">15 substrates"  
A HSP90AA1 HDAC4 HDAC2 HDAC3 RBBP4 PML" style="cursor: pointer; text-decoration: underline  
"style="cursor: pointer; text-decoration: underline dotted;">9 substrates"  
D1 SP1 MDM4 HSP90AA1 RBL1 E2F1 VHL" style="cursor: pointer; text-decoration: underline dotted;  
RP1 RELA" style="cursor: pointer; text-decoration: underline dotted;">12 substrates"  
cursor: pointer; text-decoration: underline dotted;">9 substrates"  
er; text-decoration: underline dotted;">7 substrates"  
A STAT3 FOXO1 RBL1 MYOD1 E2F1" style="cursor: pointer; text-decoration: underline dotted;">17 :  
2A STAT3 SMAD3 ESR1 GSK3B SIN3A CHUK" style="cursor: pointer; text-decoration: underline dot  
style="cursor: pointer; text-decoration: underline dotted;">11 substrates"  
2 SIN3A MAPK1 STUB1" style="cursor: pointer; text-decoration: underline dotted;">14 substrates"  
xt-decoration: underline dotted;">6 substrates"  
on: underline dotted;">6 substrates"  
xt-decoration: underline dotted;">7 substrates"  
MAPK1 STAT3" style="cursor: pointer; text-decoration: underline dotted;">11 substrates"  
ation: underline dotted;">7 substrates"  
style="cursor: pointer; text-decoration: underline dotted;">9 substrates"  
CA STUB1" style="cursor: pointer; text-decoration: underline dotted;">12 substrates"  
decoration: underline dotted;">7 substrates"  
text-decoration: underline dotted;">8 substrates"  
text-decoration: underline dotted;">8 substrates"  
ELA CAV1 GSK3B IRF1 RB1 HOXA9 MYC CDKN1A NCOR2 NCOR1 CDKN2A AHR PRKG1 CEBPB  
er; text-decoration: underline dotted;">7 substrates"  
oration: underline dotted;">6 substrates"  
:E2F1 E2F4" style="cursor: pointer; text-decoration: underline dotted;">12 substrates"  
coration: underline dotted;">6 substrates"  
n: underline dotted;">5 substrates"  
xt-decoration: underline dotted;">6 substrates"  
re dotted;">5 substrates"

dotted;">5 substrates"  
3 substrates"  
:oration: underline dotted;">7 substrates"  
ation: underline dotted;">7 substrates"  
decoration: underline dotted;">7 substrates"  
xt-decoration: underline dotted;">6 substrates"  
ointer; text-decoration: underline dotted;">8 substrates"  
oration: underline dotted;">5 substrates"  
decoration: underline dotted;">6 substrates"  
le="cursor: pointer; text-decoration: underline dotted;">10 substrates"  
LA SMAD3 CAV1 ESR1 MAPK1" style="cursor: pointer; text-decoration: underline dotted;">16 substra  
text-decoration: underline dotted;">7 substrates"  
derline dotted;">4 substrates"  
ecoration: underline dotted;">7 substrates"  
decoration: underline dotted;">6 substrates"  
dotted;">4 substrates"  
decoration: underline dotted;">6 substrates"  
on: underline dotted;">5 substrates"  
nderline dotted;">5 substrates"  
:ext-decoration: underline dotted;">7 substrates"  
tted;">4 substrates"  
derline dotted;">5 substrates"  
LA CAV1 GSK3B RB1 MYC HIF1A CDKN1A NCOR2 NCOR1 CDKN2A HDAC5 CEBPB SMAD4 SMA  
oration: underline dotted;">5 substrates"  
nderline dotted;">4 substrates"  
: underline dotted;">5 substrates"  
decoration: underline dotted;">6 substrates"  
substrates"  
ne dotted;">5 substrates"  
ointer; text-decoration: underline dotted;">8 substrates"  
underline dotted;">5 substrates"  
.3 substrates"  
dotted;">4 substrates"  
ine dotted;">4 substrates"  
ubstrates"  
nderline dotted;">5 substrates"  
ed;">3 substrates"  
ostrates"  
ne dotted;">4 substrates"  
-decoration: underline dotted;">6 substrates"  
substrates"  
nderline dotted;">5 substrates"  
>3 substrates"  
>3 substrates"  
otted;">3 substrates"  
dotted;">4 substrates"  
ubstrates"

æd;">3 substrates"  
rates"  
3 substrates"  
d;">3 substrates"  
ted;">3 substrates"  
underline dotted;">5 substrates"  
: substrates"  
ie dotted;">3 substrates"  
tted;">4 substrates"  
æd;">4 substrates"  
æ dotted;">4 substrates"  
r: underline dotted;">4 substrates"  
ubstrates"  
æ dotted;">5 substrates"  
derline dotted;">4 substrates"  
'  
æS"  
trates"  
ites"  
'  
:s"  
3 substrates"  
ubstrates"  
rates"  
tted;">3 substrates"  
ostrates"  
>2 substrates"  
æd;">3 substrates"  
strates"  
·2 substrates"  
ostrates"  
bstrates"  
rates"  
derline dotted;">5 substrates"  
æd;">3 substrates"  
·2 substrates"  
tted;">3 substrates"  
substrates"  
: dotted;">4 substrates"  
substrates"  
ates"  
æS"  
ie dotted;">4 substrates"  
  
·3 substrates"  
substrates"  
:s"

substrates"

'

"

.tes"

ed;">2 substrates"

substrates"

otted;">4 substrates"

substrates"

es"

bstrates"

substrates"

>2 substrates"

strates"

strates"

'>3 substrates"

>2 substrates"

otted;">2 substrates"

,"

rates"

strates"

ed;">3 substrates"

ed;">2 substrates"

;">2 substrates"

s"

'

2 substrates"

! substrates"

es"

"

s"

s"

s"

s"

.tes"

es"

es"

'



strates"  
"  
es"  
rates"  
ed;">3 substrates"  
s"  
s"

,"  
ites"  
"  
ates"  
'  
strates"

"  
;"  
es"

s"  
strates"  
ates"  
ubstrates"  
ates"  
ates"  
ies"  
s"  
"

,"  
rates"  
tes"  
s"  
"  
s"  
es"

ates"  
ubstrates"  
ates"  
'

bstrates"

ates"  
ne dotted;">5 substrates"  
'  
"

"  
lotted;">3 substrates"

ates"  
s"

tes"  
,

ies"  
s"  
es"

es"

s"  
ubstrates"

,

s"  
s"  
tes"

substrates"  
s"  
s"  
s"

strates"

,

ates"  
s"  
"  
s"

l;">3 substrates"

"  
es"  
rates"  
s"  
,

2 substrates"

STM1 SUMO1 UHRF1 GADD45GIP1 STUB1 TRIM28 SMARCC1 TP53 SMARCA4 RELA VDR BHLH  
COR2 STAT3 TLE1 SP1 CDK1 CEBPA CEBPB PML SKP2 RUNX1 TP53 TWIST1 CALM1 PARP1 R  
AV1 TAL1 STAT3 ETS1 ETS2 SMAD3 SP1 BHLHE40 CDK1 GSK3B CEBPA CEBPB MAPK8 MAPK7  
, PARP1 SIRT1 NCOR1 HDAC4 CEBPB RELA MAPK8 PML HIPK2" style="cursor: pointer; text-deco  
} FOS NCOR2 TAL1 HDAC4 CEBPB RELA MAPK8 MAPK7 STAT3" style="cursor: pointer; text-deco  
:CA4 RELA BHLHE40 TCF3 GSK3B RB1 CDKN1A NCOR2 NCOR1 TLE1 DNMT1 CDK1 SIN3A CEE  
UHRF1 STUB1 TRIM28 SMARCC1 TP53 SMARCA4 RELA BHLHE40 TCF3 GSK3B RB1 MED1 WD  
NCOR1 TAL1 RARA STAT3 SKI KAT6A DNMT1 SMAD3 SP1 TCF3 GSK3B HSPB1" style="cursor:  
'DR SP1 CDK1 SUMO1 SIN3A HDAC4 HDAC2 HDAC3 PML" style="cursor: pointer; text-decoration:  
TLE1 SP1 BHLHE40 CDK1 NFE2L2 HSPB1 SIN3A STUB1" style="cursor: pointer; text-decoration: u  
}PB RELA MAPK7 STAT3" style="cursor: pointer; text-decoration: underline dotted;">16 substrates"  
PARP1 CEBPA CEBPB STAT3" style="cursor: pointer; text-decoration: underline dotted;">15 substra  
LHE40 TCF3 SNAI1 CDKN1A NCOR2 NCOR1 HIPK2 TLE1 KAT6A HDAC4 CEBPA CEBPB PML TV  
3 SP1" style="cursor: pointer; text-decoration: underline dotted;">12 substrates"  
S VAV1 HDAC5 MAPK8 STAT3" style="cursor: pointer; text-decoration: underline dotted;">14 substr  
>OR1 RELA NFYA STAT3 ZBTB16 CDK1" style="cursor: pointer; text-decoration: underline dotted;">  
RARA RELA SMAD3 GSK3B HSPB1" style="cursor: pointer; text-decoration: underline dotted;">15 s  
" style="cursor: pointer; text-decoration: underline dotted;">11 substrates"  
text-decoration: underline dotted;">9 substrates"  
PB STAT3" style="cursor: pointer; text-decoration: underline dotted;">12 substrates"  
TCF3 RNF4 WDR77 CDKN1A NCOR2 USP7 TLE1 KAT6A CEBPB HDAC2 PML PARP1 NONO MA  
text-decoration: underline dotted;">12 substrates"  
dotted;">7 substrates"  
rates"  
: underline dotted;">10 substrates"  
pointer; text-decoration: underline dotted;">12 substrates"  
style="cursor: pointer; text-decoration: underline dotted;">14 substrates"  
AD3 HSPB1" style="cursor: pointer; text-decoration: underline dotted;">18 substrates"  
dotted;">7 substrates"  
LA AES NCOR2 NCOR1 TAL1 RARA TLE1 CDK1 HDAC5 CEBPB VAV1 SMAD3 HSPB1" style="cursor: pointer; text-d  
tted;">6 substrates"  
ie dotted;">7 substrates"  
otted;">7 substrates"  
ecoration: underline dotted;">10 substrates"  
dotted;">7 substrates"  
l1A NCOR2 NCOR1 AHR CDK1 CEBPB VAV1 SMAD3 HSPB1" style="cursor: pointer; text-decoration: underline d  
; text-decoration: underline dotted;">11 substrates"  
ation: underline dotted;">10 substrates"  
rates"  
dotted;">7 substrates"  
substrates"  
s"  
ted;">6 substrates"  
ates"  
es"  
6 substrates"

ed;">6 substrates"  
ted;">6 substrates"  
'>5 substrates"  
line dotted;">6 substrates"  
s"  
ates"  
ted;">7 substrates"

ates"  
:ed;">6 substrates"  
ubstrates"  
rates"  
strates"  
substrates"

ted;">7 substrates"

rates"  
ostrates"

substrates"  
ates"

:rates"  
rates"  
tes"

ed;">7 substrates"

strates"

"

ubstrates"  
s"

strates"  
5 substrates"

"

ites"

ates"

,

bstrates"

5 substrates"

strates"

tes"



rates"





JMO1 GADD45GIP1 STUB1 SMARCC1 SMARCA4 RELA CCNE1 VDR CAV1 TCF3 GSK3B IRF1 OTUB1 RB1 MED1 W  
CL6 SP1 CDK1 CEBPA CEBPB PML SKP2 RUNX1 CALM1 RELA ETS1 CCNE1 SMAD1 SMAD4 SMAD3 CAV1 TCF3 G  
A4 HNF4A RELA CCNE1 CAV1 TCF3 GSK3B RB1 NCOR2 NCOR1 TLE1 DNMT1 CDK1 SIN3A CEBPA CEBPB SKP2 R  
D3 CAV1 BCL6 SP1 CDK1 GSK3B CEBPA CEBPB MAPK8 PML STUB1" style="cursor: pointer; text-decoration: un  
3PB RELA MAPK8 PML" style="cursor: pointer; text-decoration: underline dotted;">18 substrates"  
PB RELA MAPK8 STAT3" style="cursor: pointer; text-decoration: underline dotted;">19 substrates"  
SMARCC1 SMARCA4 HNF4A RELA CCNE1 CAV1 TCF3 GSK3B RB1 MED1 WDR77 NCOR2 NCOR1 RARA USP7 DN  
I3A HDAC4 HDAC2 HDAC3 TCF7L2 PML" style="cursor: pointer; text-decoration: underline dotted;">21 substra  
PA CEBPB STAT3" style="cursor: pointer; text-decoration: underline dotted;">17 substrates"  
FOXO1 SMAD4 SMAD3 BCL6 SP1 TCF3 GSK3B" style="cursor: pointer; text-decoration: underline dotted;">23  
.6 HDAC4 CEBPA CEBPB PML RBL1 MAPK8 DAXX AR EZH2 SIRT1 STAT3 SQSTM1 FOXO3 FOXO1 NFE2L2 FOXM1  
'cursor: pointer; text-decoration: underline dotted;">15 substrates"  
T3" style="cursor: pointer; text-decoration: underline dotted;">14 substrates"  
t-decoration: underline dotted;">11 substrates"  
B1" style="cursor: pointer; text-decoration: underline dotted;">16 substrates"  
PB HDAC2 PML NONO RBL1 MAPK8 TCF7L2 DAXX AR EZH2 STAT3 YY1 FOXO3 FOXO1 NFE2L2 FOXM1 SUMO1 C  
ine dotted;">9 substrates"  
" style="cursor: pointer; text-decoration: underline dotted;">14 substrates"  
RB1 HOXA9 NCOR2 NCOR1 AHR BCL6 CDK1 PRKG1 CEBPB VAV1 SMAD3 TCF7L2" style="cursor: pointer; text-c  
"cursor: pointer; text-decoration: underline dotted;">15 substrates"  
yle="cursor: pointer; text-decoration: underline dotted;">14 substrates"  
OR2 NCOR1 TAL1 RARA TLE1 CDK1 CEBPB VAV1 SMAD4 SMAD3 TCF7L2" style="cursor: pointer; text-decoratic  
d;">6 substrates"  
otted;">6 substrates"  
ie dotted;">7 substrates"  
on: underline dotted;">9 substrates"  
otted;">7 substrates"  
lerline dotted;">7 substrates"

ne dotted;">7 substrates"  
ine dotted;">9 substrates"  
ration: underline dotted;">10 substrates"  
rates"  
substrates"  
ursor: pointer; text-decoration: underline dotted;">15 substrates"  
rline dotted;">7 substrates"  
substrates"  
ed;">7 substrates"  
;">6 substrates"  
ubstrates"  
substrates"  
s"

ted;">6 substrates"  
rates"  
rline dotted;">8 substrates"  
substrates"  
ubstrates"  
ubstrates"  
substrates"  
nderline dotted;">9 substrates"  
ates"

dotted;">8 substrates"

bstrates"  
">6 substrates"

strates"  
es"

ostrates"

ted;">5 substrates"  
;"

strates"  
ubstrates"

ates"

"

strates"  
ates"

substrates"

es"

ates"

'

s"

bstrates"

"

">6 substrates"

rates"





MDM4 SUMO1 UHRF1 GADD45 GIP1 STUB1 TRIM28 SMARCC1 TP53 SMARCA4 RELA NPM1 VDR CAV1 GSK3B OTU  
SIN3A PARP1 PAX6 SIRT1 NCOR1 CEBPB RELA MAPK8 PML HIPK2" style="cursor: pointer; text-decoration: underline dotted;">20 substrates

TRIM28 SMARCC1 TP53 SMARCA4 HNF4A SREBF1 RELA NPM1 CAV1 GSK3B RB1 SMC3 WDR77 RAD21 CDKN1A  
SMARCA4 HNF4A SREBF1 RELA NPM1 CAV1 GSK3B RB1 SMC3 CDKN1A NCOR2 NCOR1 DNMT1 CDK1 SIN3A CEBP  
A IO1 PARP1 RBL1 CEBPA CEBPB STAT3" style="cursor: pointer; text-decoration: underline dotted;">20 substrates

MAD3 CAV1 SMAD7 NFKBIA SP1 CDK1 GSK3B CEBPA CEBPB MAPK8 MAPK7 PML STUB1" style="cursor: pointer; text-decoration: underline dotted;">17 substrates

CEBPB PML SKP2 RUNX1 TP53 TOP2A SREBF1 PARP1 RELA ETS1 SMAD2 SMAD1 SMAD4 SMAD3 CAV1 SMAD7  
PML N1A NCOR2 NCOR1 HIPK2 KAT6A CEBPA CEBPB PML TOP2A TOP2B RBL1 MAPK8 MAPK7 DAXX AR EZH2 CTCF  
FOXP1 CDKN1A NCOR2 USP7 KAT6A SMC1A CEBPB HDAC2 PML TOP2A TOP2B XPO1 PARP1 RBL1 MAPK8 DAXX AR EZH2  
CTCF FOXO1 NCOR1 RELA NPM1 STAT3 NCL FOXO1 CDK1 RBL1" style="cursor: pointer; text-decoration: underline dotted;">23 substrates

PARP1 CEBPB STAT3" style="cursor: pointer; text-decoration: underline dotted;">17 substrates"

MAPK8" style="cursor: pointer; text-decoration: underline dotted;">15 substrates"

MDM1 SIN3A HDAC2 HDAC3 PML" style="cursor: pointer; text-decoration: underline dotted;">20 substrates"

MDM2 MAPK7 STAT3" style="cursor: pointer; text-decoration: underline dotted;">17 substrates"

STAT3" style="cursor: pointer; text-decoration: underline dotted;">16 substrates"

MDM4 SMAD3 SP1 MDM4 GSK3B YBX1" style="cursor: pointer; text-decoration: underline dotted;">21 substrate

SMAD7 NFKBIA CDK1 GSK3B YBX1 SIN3A" style="cursor: pointer; text-decoration: underline dotted;">20 substrates

MDM1" style="cursor: pointer; text-decoration: underline dotted;">12 substrates"

MDM3 NFKBIA MDM4 GSK3B" style="cursor: pointer; text-decoration: underline dotted;">17 substrates"

MDM2 SIN3A STUB1" style="cursor: pointer; text-decoration: underline dotted;">17 substrates"

MDM4 SMC1A RBL1" style="cursor: pointer; text-decoration: underline dotted;">17 substrates"

MDM1" style="cursor: pointer; text-decoration: underline dotted;">9 substrates"

MDM2" style="cursor: pointer; text-decoration: underline dotted;">8 substrates"

MDM1" style="cursor: pointer; text-decoration: underline dotted;">9 substrates"

MDM2" style="cursor: pointer; text-decoration: underline dotted;">6 substrates"

MDM1" style="cursor: pointer; text-decoration: underline dotted;">13 substrates"

MDM2" style="cursor: pointer; text-decoration: underline dotted;">8 substrates"

MDM1" style="cursor: pointer; text-decoration: underline dotted;">11 substrates"

MDM2" style="cursor: pointer; text-decoration: underline dotted;">8 substrates"

i: underline dotted;">8 substrates"  
coration: underline dotted;">10 substrates"  
dotted;">7 substrates"  
text-decoration: underline dotted;">10 substrates"  
nter; text-decoration: underline dotted;">12 substrates"  
ext-decoration: underline dotted;">11 substrates"  
5 substrates"  
<A9 CDKN1A NCOR2 NCOR1 AHR CDK1 PRKG1 CEBPB ATM TOP2A SMAD3 NFKBIA" style="cursor: pointer; text  
otted;">6 substrates"  
ed;">5 substrates"  
ubstrates"  
6 substrates"  
s"  
6 substrates"  
r: underline dotted;">8 substrates"  
e dotted;">7 substrates"  
ted;">7 substrates"  
<D7 NFKBIA" style="cursor: pointer; text-decoration: underline dotted;">17 substrates"  
I1 CDKN1A AES NCOR2 NCOR1 CDK1 CEBPB TOP2A TOP2B SMAD4 SMAD3 SMAD7 NFKBIA" style="cursor: poi  
ates"  
inter; text-decoration: underline dotted;">12 substrates"  
s"  
otted;">7 substrates"  
>6 substrates"  
5 substrates"  
d;">6 substrates"  
'>6 substrates"  
>7 substrates"  
"  
rates"  
rates"  
s"  
;">7 substrates"  
  
ites"  
substrates"  
  
es"  
ates"  
  
ubstrates"  
  
ubstrates"  
rates"  
ates"  
:rates"



>5 substrates"  
substrates"  
;"

ted;">6 substrates"

rates"  
"

ates"  
bstrates"  
ubstrates"

"  
es"  
strates"

substrates"

ibstrates"

'  
'

strates"

35"

tes"



CL1" style="cursor: pointer; text-decoration: underline dotted;">25 substrates"

C1 SMARCA4 RELA PPP1CA CAV1 GSK3B IRF1 OTUB1 VHL RB1 PHB2 MYC WDR77 HIF1A CDK1  
NF4A RELA PPP1CA DDX5 CAV1 GSK3B WHSC1 MYOD1 VHL REST RB1 MYC WDR77 HIF1A C  
-HIF1A CDKN1A NCOR2 NCOR1 CDKN2A SIN3A CHUK CEBPA CEBPB RBBP4 ASXL1 KAT5 SKP2  
cursor: pointer; text-decoration: underline dotted;">22 substrates"

B1 KDM5A RBL1 MAPK1 EHMT2 DAXX AR EZH2 SIRT1 STAT3 SQSTM1 FOXO1 NFKB1 MDM4 N  
IKK MAPK1" style="cursor: pointer; text-decoration: underline dotted;">25 substrates"

e="cursor: pointer; text-decoration: underline dotted;">21 substrates"

ML ASXL1 KAT5 SETDB1 PARP1 RBL1 MAPK1 EHMT2 DAXX AR EZH2 STAT3 YY1 FOXO1 MDM  
dotted;">18 substrates"

MAD1 SMAD4 SMAD3 CAV1 ESR1 GSK3B MAPK1" style="cursor: pointer; text-decoration: underline  
dotted;">17 substrates"

ates"

decoration: underline dotted;">21 substrates"

dotted;">17 substrates"

;">17 substrates"

substrates"

ted;">16 substrates"

HIST1H3A SMAD3 ESR1 MAPK1" style="cursor: pointer; text-decoration: underline dotted;">28 sub

ites"

\D3 ESR1 MAPK1" style="cursor: pointer; text-decoration: underline dotted;">25 substrates"











E40 TCF3 GSK3B RB1 MED1 WDR77 SNAI1 CDKN1A NCOR2 NCOR1 USP7 TLE1 DNMT1 CDK1  
:ELA ETS1 ETS2 SMAD3 BHLHE40 TCF3 GSK3B HSPB1 MAPK8 MAPK7" style="cursor: pointer; te  
7 PML STUB1" style="cursor: pointer; text-decoration: underline dotted;">27 substrates"

ration: underline dotted;">20 substrates"

ration: underline dotted;">21 substrates"

3PA CEBPB SKP2 RUNX1 TWIST1 SIAH2 PARP1 VAV1 SUZ12 SMAD3 HSPB1 MAPK8" style="cur  
R77 CDKN1A NCOR2 NCOR1 RARA USP7 KAT6A DNMT1 CDK1 SIN3A CEBPA CEBPB HDAC2 F  
pointer; text-decoration: underline dotted;">23 substrates"

underline dotted;">20 substrates"

underline dotted;">19 substrates"

tes"

MIST1 MAPK8 MAPK7 DAXX AR EZH2 SIRT1 STAT3 SQSTM1 NFE2L2 CALM1 GSK3B RB1 MED1

ates"

17 substrates"

substrates"

.PK8 DAXX AR EZH2 STAT3 YY1 ZBTB16 NFE2L2 SUMO1 GSK3B RB1 MED1 TCF20 DNMT1 CD1

decoration: underline dotted;">28 substrates"

lotted;">24 substrates"













/DR77 NCOR2 NCOR1 USP7 TLE1 DNMT1 CDK1 SIN3A CEBPB HDAC2 HDAC3 PML RUNX1 PRMT1 SUZ12 SMAD4  
GSK3B MAPK8 TCF7L2" style="cursor: pointer; text-decoration: underline dotted;">35 substrates"  
JNX1 SIAH2 VAV1 SUZ12 SMAD4 SMAD3 MAPK8 TCF7L2" style="cursor: pointer; text-decoration: underline dotted;">26 substrates"

MT1 CDK1 SIN3A CEBPA CEBPB HDAC2 PML SKP2 RUNX1 SUZ12 SMAD4 SMAD3 NONO RBL1 MAPK8" style="cursor: pointer; text-decoration: underline dotted;">27 substrates"

substrates"

CALM1 CCNE1 GSK3B IRF1 RB1 MED1 TCF20 DNMT1 CDK1 SIN3A SKP2 RUNX1 SUZ12 SMAD1 SMAD4 SMAD3

CNE1 GSK3B RB1 MED1 TCF20 PAX6 DNMT1 CDK1 SIN3A SKP2 RUNX1 PRMT1 SUZ12 SMAD4 SMAD3" style="cursor: pointer; text-decoration: underline dotted;">28 substrates"

text-decoration: underline dotted;">28 substrates"

text-decoration: underline dotted;">27 substrates"











RB1 SMC3 WDR77 RAD21 SNAI1 CDKN1A NCOR2 NCOR1 USP7 NCL DNMT1 COPS5 CDK1 SIN3A CEBPB HDAC2  
style="text-decoration: underline dotted;">24 substrates"

NCOR2 NCOR1 USP7 KAT6A NCL DNMT1 CDK1 SIN3A SMC1A CEBPA CEBPB HDAC2 PML SOX2 SKP2 RUNX1 A  
CEBPB SKP2 RUNX1 SIAH2 TOP2A TOP2B XPO1 PARP1 SUZ12 SMAD4 SMAD3 NFKBIA MAPK8" style="cursor  
pointer; text-decoration: underline dotted;">27 substrates"

NFKBIA GSK3B MAPK8 MAPK7" style="cursor: pointer; text-decoration: underline dotted;">35 substrates"

SIRT1 STAT3 SQSTM1 KPNB1 FOXO3 FOXO1 MDM4 NFE2L2 NPM1 GSK3B RB1 TCF20 DNMT1 CDK1 SIN3A KLF5  
CTCF STAT3 YY1 ZBTB33 KPNB1 FOXO3 FOXO1 MDM4 NFE2L2 SUMO1 NPM1 GSK3B CHD8 RB1 RAD21 TCF20  
>3 substrates"

!S"  
:rates"



-decoration: underline dotted;">27 substrates"

nter; text-decoration: underline dotted;">28 substrates"











<N1A NCOR2 NCOR1 CDKN2A USP7 CUL3 SKIL COPS5 SIN3A CHUK CEBPB HDAC2 HDAC3 RE  
DKN1A NCOR2 NCOR1 CDKN2A USP7 SIN3A CHUK CEBPA CEBPB HDAC2 RBBP4 PML ASXL1  
? HIST1H3A SIAH2 PARP1 SUZ12 SMAD4 SMAD3 ESR1 MAPK1" style="cursor: pointer; text-decora

FE2L2 SNW1 GSK3B IRF1 VHL RB1 MYC HIF1A TCF20 SKIL SIN3A CHUK RBBP4 KLF5 SKP2 SL

/4 NFE2L2 SUMO1 HSP90AA1 SNW1 PPP1CA GSK3B VHL RB1 MYC HIF1A TCF20 PAX6 SIN3A

e dotted;">31 substrates"

strates"













SIN3A CEBPB HDAC2 HDAC3 PML RUNX1 TWIST1 PRMT1 SUZ12 SMAD3 HSPA4 NONO HSPB  
:xt-decoration: underline dotted;">35 substrates"

'sor: pointer; text-decoration: underline dotted;">36 substrates"  
'ML SKP2 RUNX1 ZFPM1 SUZ12 NFYA SMAD3 NONO HSPB1 MAPK8" style="cursor: pointer; text-

I TCF20 DNMT1 CDK1 SIN3A SKP2 RUNX1 ZFPM1 SUZ12 SMAD3 HSPB1" style="cursor: pointer;

<1 SIN3A SKP2 RUNX1 PRMT1 SUZ12 SMAD3 HSPB1" style="cursor: pointer; text-decoration: unde













4 SMAD3 NONO RBL1" style="cursor: pointer; text-decoration: underline dotted;">49 substrates"

otted;">39 substrates"

ursor: pointer; text-decoration: underline dotted;">45 substrates"

" style="cursor: pointer; text-decoration: underline dotted;">47 substrates"

ursor: pointer; text-decoration: underline dotted;">46 substrates"













AC2 HDAC3 PML SOX2 RUNX1 TOP2A TOP2B XPO1 PRMT1 SUZ12 SMAD4 SMAD3 NFKBIA RBL1 MAPK9" style="

TM TOP2A TOP2B XPO1 SUZ12 SMAD4 SMAD3 NFKBIA YBX1 RBL1 MAPK8" style="cursor: pointer; text-decoration: underline dotted;">44 substrates"

SOX2 SKP2 RUNX1 SUZ12 SMAD2 SMAD1 SMAD4 SMAD3 SMAD7 NFKBIA" style="cursor: pointer; text-decoration: underline dotted;">44 substrates"  
) PAX6 NCL DNMT1 CDK1 SIN3A SOX2 SKP2 RUNX1 PRMT1 SUZ12 SMAD2 SMAD4 SMAD3 NFKBIA" style="cursor: pointer; text-decoration: underline dotted;">44 substrates"













3BP4 PML SUZ12 SMAD4 SMAD3 ESR1 RBL1 MAPK1" style="cursor: pointer; text-decoration: underline dotted;">45 substrates"  
KAT5 SKP2 SETDB1 SUZ12 SMAD4 SMAD3 ESR1 RBL1 MAPK1" style="cursor: pointer; text-decoration: underline dotted;">45 substrates"

JZ12 CDYL SMAD2 SMAD1 SMAD4 SMAD3 SMURF1 ESR1" style="cursor: pointer; text-decoration: underline dotted;">45 substrates"

CHUK RBBP4 SKP2 SUZ12 CDYL SMAD2 SMAD4 SMAD3 ESR1" style="cursor: pointer; text-decoration: underline dotted;">45 substrates"













1 MAPK9" style="cursor: pointer; text-decoration: underline dotted;">50 substrates"

text-decoration: underline dotted;">46 substrates"

text-decoration: underline dotted;">47 substrates"

text-decoration: underline dotted;">45 substrates"



























"cursor: pointer; text-decoration: underline dotted;">60 substrates"

tion: underline dotted;">57 substrates"

tion: underline dotted;">57 substrates"

or: pointer; text-decoration: underline dotted;">61 substrates"















rline dotted;">56 substrates"  
ration: underline dotted;">58 substrates"

underline dotted;">59 substrates"

ation: underline dotted;">60 substrates"

**Supplemental Table III:** Blood pressure measurements of mice of the indicated genotypes (n=30-35 mice per genotype).

| <b>Genotype</b>                  | <b>Systolic</b> | <b>Diastolic</b> | <b>Mean</b> |
|----------------------------------|-----------------|------------------|-------------|
| <b>WT</b>                        | 99±4            | 74±3             | 82±5        |
| <b>Hipk2<sup>R-/R-</sup></b>     | 94±7            | 71±5             | 78±7        |
| <b>MFS</b>                       | 105±5           | 80±5             | 88±3        |
| <b>MFS;Hipk2<sup>R-/R-</sup></b> | 104±6           | 81±4             | 91±4        |

**Supplemental Table IV List of DEGs identified in aortas of MFS patients**

| <b>Comparison</b> | <b>NCBI gene symbol</b> | <b>P-value</b> | <b>Q-value</b> | <b>Log2(fold_change)</b> |
|-------------------|-------------------------|----------------|----------------|--------------------------|
| FB vs AS          | AAAS                    | 3.99236E-13    | 3.96812E-11    | -0.8432809               |
| FB vs AS          | AARSD1                  | 0              | 0              | -0.8199553               |
| FB vs AS          | ABCB4                   | 0.000335463    | 0.00497917     | -1.375102                |
| FB vs AS          | ABCC3                   | 8.34122E-11    | 5.99061E-09    | -1.446303                |
| FB vs AS          | ABCD4                   | 0.000263168    | 0.00402969     | -0.8942512               |
| FB vs AS          | ABL2                    | 4.21838E-09    | 2.15998E-07    | -0.8727594               |
| FB vs AS          | ABLIM1                  | 2.06593E-05    | 0.00045904     | 0.7108819                |
| FB vs AS          | ABR                     | 0              | 0              | -1.018789                |
| FB vs AS          | ACAD11                  | 0.00108998     | 0.0131744      | -0.6975787               |
| FB vs AS          | ACAD9                   | 6.66134E-16    | 9.75711E-14    | -0.8099042               |
| FB vs AS          | ACIN1                   | 7.96829E-12    | 6.77122E-10    | -0.9841055               |
| FB vs AS          | ACOX3                   | 7.41632E-10    | 4.69082E-08    | -0.9281282               |
| FB vs AS          | ACRC                    | 0.00444597     | 0.0412782      | -1.960485                |
| FB vs AS          | ACSS1                   | 7.4829E-14     | 7.9333E-12     | -1.300108                |
| FB vs AS          | ACSS2                   | 3.07222E-08    | 1.34645E-06    | -0.8692014               |
| FB vs AS          | ADAMTS9                 | 0.00213977     | 0.0230144      | -0.554121                |
| FB vs AS          | ADARB1                  | 2.00952E-05    | 0.0004474      | -1.316787                |
| FB vs AS          | ADCY6                   | 0.000217218    | 0.00342989     | -0.9995689               |
| FB vs AS          | ADCY7                   | 1.8069E-06     | 5.34958E-05    | 0.925166                 |
| FB vs AS          | ADGRA2                  | 0.00384449     | 0.036862       | 1.22702                  |
| FB vs AS          | ADGRB1                  | 1.19153E-05    | 0.000284028    | -2.683001                |
| FB vs AS          | ADGRB2                  | 8.80316E-05    | 0.00160914     | 0.7946585                |
| FB vs AS          | ADGRF5                  | 0              | 0              | 2.950191                 |
| FB vs AS          | ADGRG1                  | 0.00402946     | 0.0382915      | -1.923137                |
| FB vs AS          | ADHFE1                  | 0              | 0              | -1.526735                |
| FB vs AS          | ADM                     | 0.000696789    | 0.00910405     | 0.9544768                |
| FB vs AS          | ADRA1A                  | 0.00565364     | 0.0492459      | -2.818947                |
| FB vs AS          | ADRA1D                  | 5.07979E-05    | 0.000993282    | -1.772842                |
| FB vs AS          | ADRA2C                  | 0.000198093    | 0.00315025     | -1.924417                |
| FB vs AS          | AFF3                    | 0.00309405     | 0.0311138      | -1.297626                |
| FB vs AS          | AGAP3                   | 0.000392484    | 0.00564487     | -0.9099944               |
| FB vs AS          | AHI1                    | 0.000901753    | 0.0113299      | -0.8792961               |
| FB vs AS          | AHNAK2                  | 0.00220555     | 0.0234725      | 1.295983                 |
| FB vs AS          | AKAP13                  | 8.20988E-12    | 6.92366E-10    | -0.6537082               |
| FB vs AS          | AKAP9                   | 0.00200009     | 0.0218071      | -0.442843                |
| FB vs AS          | AKNA                    | 6.66134E-15    | 8.52345E-13    | -1.11482                 |
| FB vs AS          | AKR1A1                  | 1.03308E-09    | 6.18295E-08    | 0.5216148                |
| FB vs AS          | AKR1C2                  | 0              | 0              | 1.501397                 |
| FB vs AS          | ALCAM                   | 0.00159906     | 0.018164       | 0.8904775                |
| FB vs AS          | ALS2CR12                | 0.000665511    | 0.00876725     | -1.461442                |
| FB vs AS          | AMACR                   | 1.37497E-09    | 7.8898E-08     | 0.8452834                |
| FB vs AS          | AMDHD2                  | 0.000983306    | 0.0122031      | -0.6982397               |
| FB vs AS          | AMER1                   | 0.00554869     | 0.0486807      | -0.9701349               |
| FB vs AS          | AMOTL2                  | 2.71036E-06    | 7.81651E-05    | 1.237032                 |
| FB vs AS          | ANAPC2                  | 0.000321859    | 0.00480285     | -1.124207                |

|          |          |             |             |            |
|----------|----------|-------------|-------------|------------|
| FB vs AS | ANAPC5   | 3.28402E-09 | 1.72442E-07 | -0.9733605 |
| FB vs AS | ANGPT1   | 2.55214E-11 | 1.97294E-09 | 1.547242   |
| FB vs AS | ANGPTL1  | 0.00110112  | 0.0132803   | -1.535898  |
| FB vs AS | ANKLE2   | 8.39872E-08 | 3.44998E-06 | -0.9797172 |
| FB vs AS | ANKMY1   | 0.000660302 | 0.00872978  | -1.053225  |
| FB vs AS | ANKRD10  | 3.25186E-07 | 1.15286E-05 | -1.012484  |
| FB vs AS | ANKRD13D | 3.48906E-10 | 2.2451E-08  | -1.256819  |
| FB vs AS | ANKRD6   | 0.000147667 | 0.00246822  | 0.6621571  |
| FB vs AS | ANKS1B   | 7.87289E-06 | 0.000198283 | -0.7292957 |
| FB vs AS | ANKS3    | 1.90292E-13 | 1.94342E-11 | -1.190891  |
| FB vs AS | ANKS6    | 7.30024E-05 | 0.00136582  | -1.072912  |
| FB vs AS | ANKZF1   | 3.37508E-14 | 3.87334E-12 | -1.408873  |
| FB vs AS | ANOS1    | 0.000551778 | 0.00749072  | 1.880218   |
| FB vs AS | ANTXR1   | 9.63979E-05 | 0.00173641  | 1.194656   |
| FB vs AS | ANTXR2   | 0.00101629  | 0.0125147   | 0.9051775  |
| FB vs AS | ANXA3    | 0.00336246  | 0.0332411   | 1.394404   |
| FB vs AS | AP2A2    | 1.0435E-05  | 0.000254742 | -0.8910686 |
| FB vs AS | AP2B1    | 0.000519352 | 0.00711122  | 0.4679998  |
| FB vs AS | APLN     | 1.11298E-08 | 5.36351E-07 | 3.646226   |
| FB vs AS | AQP1     | 2.70416E-08 | 1.19455E-06 | 0.4512905  |
| FB vs AS | ARFGAP1  | 0.000717777 | 0.00932897  | -1.192371  |
| FB vs AS | ARGLU1   | 9.78568E-11 | 6.93849E-09 | -2.267305  |
| FB vs AS | ARHGAP22 | 1.04424E-06 | 3.30241E-05 | -1.253464  |
| FB vs AS | ARHGAP25 | 0.00322612  | 0.0322595   | 0.5978763  |
| FB vs AS | ARHGAP26 | 1.80146E-05 | 0.000407598 | -1.560099  |
| FB vs AS | ARHGAP32 | 0.000129598 | 0.00220931  | -1.330304  |
| FB vs AS | ARHGAP33 | 4.40195E-11 | 3.31098E-09 | -1.684006  |
| FB vs AS | ARHGEF1  | 1.00364E-13 | 1.04416E-11 | -1.149113  |
| FB vs AS | ARHGEF17 | 0.0028286   | 0.0288881   | -0.8095191 |
| FB vs AS | ARHGEF2  | 2.23061E-05 | 0.000485932 | -0.7105328 |
| FB vs AS | ARHGEF28 | 0.000350092 | 0.00516464  | 0.7788789  |
| FB vs AS | ARHGEF7  | 6.58403E-10 | 4.18819E-08 | -1.346813  |
| FB vs AS | ARID4A   | 0.000139229 | 0.0023377   | -0.7335579 |
| FB vs AS | ARIH2    | 1.94189E-08 | 9.00712E-07 | -0.7533236 |
| FB vs AS | ARL6IP1  | 0.000665066 | 0.00876725  | 0.8459253  |
| FB vs AS | ARL6IP5  | 7.56373E-07 | 2.48376E-05 | 0.6830605  |
| FB vs AS | ARMC8    | 0.000323531 | 0.00482134  | -0.8411255 |
| FB vs AS | ARMC9    | 0.00128786  | 0.0151228   | -1.115698  |
| FB vs AS | ARNTL    | 2.41986E-05 | 0.000521043 | -2.717763  |
| FB vs AS | ARPP19   | 5.34762E-05 | 0.0010335   | 0.5782333  |
| FB vs AS | ARRB2    | 0.00281301  | 0.0287816   | -0.7561291 |
| FB vs AS | ARSA     | 0.000872336 | 0.0109976   | -0.8228611 |
| FB vs AS | ARSE     | 0.000208316 | 0.00330338  | 1.923343   |
| FB vs AS | ASAP3    | 4.57279E-06 | 0.000123554 | -1.398408  |
| FB vs AS | ASB16    | 0.00292659  | 0.029698    | -1.287503  |
| FB vs AS | ASCC1    | 0.000587955 | 0.00788568  | -0.5481139 |
| FB vs AS | ATF3     | 3.19046E-05 | 0.000655281 | 1.081093   |

|          |          |             |             |            |
|----------|----------|-------------|-------------|------------|
| FB vs AS | ATG16L2  | 2.82095E-08 | 1.24122E-06 | -0.9199218 |
| FB vs AS | ATG4D    | 0.00353362  | 0.0345806   | -0.9546014 |
| FB vs AS | ATP10A   | 8.43769E-15 | 1.05538E-12 | -2.537244  |
| FB vs AS | ATP13A1  | 5.88834E-07 | 1.99237E-05 | -1.265526  |
| FB vs AS | ATP2A3   | 1.77545E-06 | 5.27047E-05 | -0.9043756 |
| FB vs AS | ATRN     | 0.000508714 | 0.0070056   | 0.5714812  |
| FB vs AS | ATXN2    | 0.00019182  | 0.00306361  | -0.7159666 |
| FB vs AS | ATXN7    | 0.00511483  | 0.0459179   | -0.5436587 |
| FB vs AS | ATXN7L1  | 0.000534422 | 0.00728174  | -0.7775681 |
| FB vs AS | AUTS2    | 8.21446E-05 | 0.00152152  | -0.9901956 |
| FB vs AS | B3GALNT1 | 0.00302292  | 0.0305364   | 1.136792   |
| FB vs AS | B3GALT2  | 0.00571774  | 0.0497654   | 1.425248   |
| FB vs AS | B4GALNT3 | 5.46205E-11 | 4.02673E-09 | -1.930524  |
| FB vs AS | BANF1    | 9.51344E-07 | 3.03449E-05 | 0.5294521  |
| FB vs AS | BAP1     | 0.00115098  | 0.0138068   | -0.5506615 |
| FB vs AS | BARD1    | 0.00073774  | 0.00953835  | -0.7031292 |
| FB vs AS | BAZ2A    | 2.24265E-14 | 2.62791E-12 | -1.314667  |
| FB vs AS | BCAS2    | 0.000166204 | 0.00272888  | 0.437412   |
| FB vs AS | BCAT1    | 0.00213158  | 0.0229707   | 0.695303   |
| FB vs AS | BCL3     | 0.00337649  | 0.0332924   | -1.110952  |
| FB vs AS | BCL6     | 2.29535E-06 | 6.65816E-05 | -0.9583753 |
| FB vs AS | BCL6B    | 0.00345228  | 0.0339195   | 2.062303   |
| FB vs AS | BCORL1   | 3.82892E-05 | 0.000763568 | -0.7377556 |
| FB vs AS | BCR      | 2.10499E-05 | 0.00046586  | -1.057553  |
| FB vs AS | BDNF     | 7.06102E-14 | 7.55801E-12 | 2.153999   |
| FB vs AS | BHLHE40  | 1.65188E-11 | 1.35211E-09 | 2.070935   |
| FB vs AS | BHMT2    | 1.66864E-05 | 0.000382208 | -0.8558531 |
| FB vs AS | BICD1    | 0.00312389  | 0.0313855   | -1.016466  |
| FB vs AS | BID      | 0.000468303 | 0.00656568  | 1.377024   |
| FB vs AS | BMP4     | 3.34104E-06 | 9.4397E-05  | 1.826148   |
| FB vs AS | BNC2     | 0.000476746 | 0.0066589   | -0.7458209 |
| FB vs AS | BOC      | 1.47406E-07 | 5.67792E-06 | -1.721543  |
| FB vs AS | BRD4     | 0.00344911  | 0.0339183   | -0.5094087 |
| FB vs AS | BRD9     | 3.02113E-05 | 0.000623957 | -0.9352105 |
| FB vs AS | BRICD5   | 3.84771E-07 | 1.35119E-05 | -2.235798  |
| FB vs AS | BRPF3    | 0.000138882 | 0.0023354   | -0.7894991 |
| FB vs AS | BRSK1    | 1.36216E-06 | 4.18884E-05 | -1.749576  |
| FB vs AS | BTBD19   | 0.000117526 | 0.00204422  | -1.064957  |
| FB vs AS | BTN3A1   | 1.06029E-07 | 4.23052E-06 | 0.9320894  |
| FB vs AS | BTNL9    | 0.000208781 | 0.00330605  | -2.585858  |
| FB vs AS | C11ORF80 | 0.00103344  | 0.0126738   | -0.9719176 |
| FB vs AS | C15ORF52 | 1.69438E-07 | 6.39383E-06 | -1.549662  |
| FB vs AS | C15ORF59 | 5.06346E-06 | 0.000133887 | -1.913367  |
| FB vs AS | C19ORF66 | 8.51324E-05 | 0.00156903  | -0.9945363 |
| FB vs AS | C1ORF159 | 0.00280643  | 0.0287407   | -1.358149  |
| FB vs AS | C1ORF198 | 0.000848282 | 0.0107186   | 0.94586    |
| FB vs AS | C1RL     | 2.52265E-05 | 0.000539004 | -0.7908827 |

|          |          |             |             |            |
|----------|----------|-------------|-------------|------------|
| FB vs AS | C21ORF58 | 0.00428803  | 0.0402142   | -1.586502  |
| FB vs AS | C2ORF40  | 0.00234224  | 0.0246445   | 1.89296    |
| FB vs AS | C3       | 6.94726E-08 | 2.8857E-06  | 2.86161    |
| FB vs AS | C4A      | 0.00191055  | 0.0210994   | -1.325256  |
| FB vs AS | C5ORF46  | 0.000412133 | 0.005897    | 2.559767   |
| FB vs AS | C7ORF43  | 3.90624E-07 | 1.36314E-05 | -0.858746  |
| FB vs AS | C9ORF47  | 0.000585481 | 0.00786197  | -2.708931  |
| FB vs AS | CACNA2D3 | 0.00488397  | 0.0443461   | -1.963015  |
| FB vs AS | CACTIN   | 0.000843063 | 0.0106769   | -0.9616553 |
| FB vs AS | CALCRL   | 0.00205016  | 0.022244    | 2.524124   |
| FB vs AS | CALR     | 0.00215048  | 0.0230405   | 0.7953217  |
| FB vs AS | CALU     | 1.61412E-06 | 4.8537E-05  | 0.5833347  |
| FB vs AS | CAMK2B   | 8.19345E-13 | 7.79568E-11 | -3.823105  |
| FB vs AS | CAMK2G   | 9.56936E-05 | 0.00172652  | -0.7955866 |
| FB vs AS | CAMKK2   | 0.00109346  | 0.0132022   | -0.5000491 |
| FB vs AS | CANX     | 1.18055E-08 | 5.66458E-07 | 0.6033314  |
| FB vs AS | CAPN1    | 0.000220294 | 0.00346862  | -0.503437  |
| FB vs AS | CAPN10   | 6.44217E-08 | 2.68593E-06 | -0.8940226 |
| FB vs AS | CAPN15   | 0.00378451  | 0.0363539   | -1.0186    |
| FB vs AS | CAPN2    | 0.00285384  | 0.0291191   | -1.025051  |
| FB vs AS | CAPN3    | 0.00452839  | 0.0418688   | -1.674362  |
| FB vs AS | CAPNS1   | 0           | 0           | 0.7574211  |
| FB vs AS | CAPRIN2  | 9.08969E-07 | 2.91603E-05 | -1.336913  |
| FB vs AS | CAPS     | 0.00504057  | 0.0453977   | -1.296061  |
| FB vs AS | CARS2    | 5.10703E-15 | 6.6884E-13  | -1.095657  |
| FB vs AS | CASZ1    | 0           | 0           | -2.23807   |
| FB vs AS | CCAR1    | 0.000470763 | 0.00659187  | -0.6271423 |
| FB vs AS | CCDC130  | 0           | 0           | -2.129268  |
| FB vs AS | CCDC136  | 2.77556E-14 | 3.21849E-12 | -1.801049  |
| FB vs AS | CCDC14   | 0.000581654 | 0.00782502  | -0.5668879 |
| FB vs AS | CCDC142  | 1.25919E-05 | 0.000298241 | -1.430283  |
| FB vs AS | CCDC144A | 0.00204745  | 0.022244    | -2.049447  |
| FB vs AS | CCDC144B | 2.62411E-08 | 1.16846E-06 | -1.416861  |
| FB vs AS | CCDC146  | 3.10862E-15 | 4.1693E-13  | 0.868943   |
| FB vs AS | CCDC149  | 3.88764E-05 | 0.000772807 | -1.222383  |
| FB vs AS | CCDC159  | 1.89206E-07 | 7.06794E-06 | -1.476482  |
| FB vs AS | CCDC190  | 3.42349E-08 | 1.48868E-06 | 2.304881   |
| FB vs AS | CCDC40   | 1.98805E-05 | 0.000443507 | -2.101536  |
| FB vs AS | CCDC57   | 5.65587E-09 | 2.86187E-07 | -1.498058  |
| FB vs AS | CCDC66   | 6.24774E-05 | 0.00119092  | -0.5298948 |
| FB vs AS | CCDC80   | 0.00188854  | 0.0209604   | 0.9901658  |
| FB vs AS | CCDC82   | 0.00448886  | 0.0415723   | -0.7120954 |
| FB vs AS | CCNK     | 1.93371E-09 | 1.0763E-07  | -0.885991  |
| FB vs AS | CCNL1    | 0.00102006  | 0.0125473   | -0.6182341 |
| FB vs AS | CD34     | 0.00141532  | 0.016429    | 0.6014155  |
| FB vs AS | CD37     | 0.00553846  | 0.0486807   | 0.6548783  |
| FB vs AS | CD4      | 0.00140178  | 0.0162887   | 1.281067   |

|          |          |             |             |            |
|----------|----------|-------------|-------------|------------|
| FB vs AS | CD44     | 0.00100782  | 0.0124309   | 0.4870883  |
| FB vs AS | CDCA7L   | 0.00108526  | 0.0131602   | 1.563367   |
| FB vs AS | CDH11    | 1.1992E-08  | 5.70492E-07 | 1.793268   |
| FB vs AS | CDH19    | 2.63864E-05 | 0.000560559 | 2.760658   |
| FB vs AS | CDH2     | 8.93771E-05 | 0.00162839  | 1.341917   |
| FB vs AS | CDH5     | 0.00181468  | 0.0203025   | 1.448246   |
| FB vs AS | CDH8     | 2.13571E-06 | 6.25651E-05 | -1.470358  |
| FB vs AS | CDK3     | 0.00260109  | 0.0268602   | -1.176401  |
| FB vs AS | CDK9     | 0.00332175  | 0.0329569   | -0.9841795 |
| FB vs AS | CEACAM19 | 0.00424423  | 0.0399043   | -1.184972  |
| FB vs AS | CEBPB    | 0.00231365  | 0.024436    | -1.668313  |
| FB vs AS | CEBPD    | 0.0013034   | 0.0152892   | -1.645254  |
| FB vs AS | CEP131   | 0.00111782  | 0.0134525   | -1.223796  |
| FB vs AS | CEP295NL | 0.000679936 | 0.00890476  | -1.85741   |
| FB vs AS | CERCAM   | 0.000269891 | 0.00412129  | 0.6987991  |
| FB vs AS | CES4A    | 1.61761E-06 | 4.8537E-05  | -1.940738  |
| FB vs AS | CFD      | 8.62372E-10 | 5.33329E-08 | 1.817678   |
| FB vs AS | CFH      | 2.90687E-06 | 8.31857E-05 | 1.611803   |
| FB vs AS | CHD6     | 3.33949E-05 | 0.00067962  | -1.789463  |
| FB vs AS | CHFR     | 8.89934E-09 | 4.403E-07   | -1.708171  |
| FB vs AS | CHIT1    | 0.000802695 | 0.0102355   | -2.032073  |
| FB vs AS | CHN2     | 3.02404E-09 | 1.60002E-07 | 2.239984   |
| FB vs AS | CHST15   | 0.000131931 | 0.00223881  | 1.090555   |
| FB vs AS | CIC      | 2.39665E-05 | 0.000517044 | -0.9413783 |
| FB vs AS | CKM      | 0.000812601 | 0.01035     | 3.546692   |
| FB vs AS | CLASRP   | 0           | 0           | -1.978717  |
| FB vs AS | CLCN7    | 0.00445633  | 0.0413399   | -1.092988  |
| FB vs AS | CLEC16A  | 4.21971E-07 | 1.46793E-05 | -1.217824  |
| FB vs AS | CLK1     | 8.58715E-10 | 5.33329E-08 | -1.333431  |
| FB vs AS | CLK2     | 2.4418E-11  | 1.91424E-09 | -1.726432  |
| FB vs AS | CLK3     | 4.87927E-11 | 3.64537E-09 | -1.143878  |
| FB vs AS | CLUH     | 0.00356084  | 0.0348018   | -0.7872727 |
| FB vs AS | CMTR1    | 0.00328069  | 0.0326465   | -0.6740121 |
| FB vs AS | CNOT3    | 0.00108829  | 0.0131684   | -0.6245519 |
| FB vs AS | CNTN1    | 0.00470925  | 0.0430405   | 0.7242808  |
| FB vs AS | CNTN5    | 0.00364892  | 0.0353523   | -2.547177  |
| FB vs AS | COL10A1  | 0.00220424  | 0.0234725   | 2.502373   |
| FB vs AS | COL15A1  | 2.43626E-05 | 0.000523562 | 1.853301   |
| FB vs AS | COL1A2   | 0.000524296 | 0.0071613   | 0.8320629  |
| FB vs AS | COL21A1  | 0.000373708 | 0.00541681  | 0.8396047  |
| FB vs AS | COL3A1   | 0.000599366 | 0.00800978  | 0.8604489  |
| FB vs AS | COL4A3   | 0.000445934 | 0.00630767  | -1.432342  |
| FB vs AS | COL6A3   | 4.22892E-06 | 0.000115895 | 1.279643   |
| FB vs AS | COL7A1   | 0.000171917 | 0.00281438  | -2.382302  |
| FB vs AS | COL8A1   | 9.6402E-11  | 6.87915E-09 | 2.561815   |
| FB vs AS | COL9A2   | 0.000393922 | 0.00565095  | -1.8857    |
| FB vs AS | COPRS    | 0.00537332  | 0.047624    | 0.9371071  |

|          |          |             |             |            |
|----------|----------|-------------|-------------|------------|
| FB vs AS | CORIN    | 0.00514892  | 0.0460754   | 1.600191   |
| FB vs AS | CORO6    | 7.81314E-07 | 2.54315E-05 | -1.309865  |
| FB vs AS | CORO7    | 2.12377E-05 | 0.000468155 | -1.258544  |
| FB vs AS | COTL1    | 0.000431904 | 0.00611922  | 1.153866   |
| FB vs AS | COX7A2L  | 0.00464919  | 0.0426469   | 0.7486656  |
| FB vs AS | COX7C    | 1.17201E-06 | 3.66484E-05 | 0.6807802  |
| FB vs AS | CPAMD8   | 0.000321797 | 0.00480285  | -1.83516   |
| FB vs AS | CPEB3    | 0.00153967  | 0.0175971   | -1.785415  |
| FB vs AS | CPED1    | 1.56996E-08 | 7.37416E-07 | 0.7998987  |
| FB vs AS | CPNE1    | 0.00144746  | 0.016767    | -0.6524042 |
| FB vs AS | CPNE2    | 0.00217427  | 0.0232283   | 0.7061706  |
| FB vs AS | CPNE3    | 0.000109078 | 0.00193014  | 0.7247935  |
| FB vs AS | CPQ      | 6.57205E-05 | 0.00124211  | 0.8395923  |
| FB vs AS | CRABP2   | 0.000112337 | 0.00197558  | 1.12396    |
| FB vs AS | CREB5    | 0.00153947  | 0.0175971   | -0.5859728 |
| FB vs AS | CREBZF   | 0           | 0           | -1.782815  |
| FB vs AS | CRIM1    | 9.30504E-08 | 3.76668E-06 | 1.249685   |
| FB vs AS | CRISPLD1 | 4.72708E-07 | 1.61913E-05 | 1.766018   |
| FB vs AS | CRLF1    | 0.00136043  | 0.015858    | 1.216867   |
| FB vs AS | CROCCP3  | 0           | 0           | -1.771025  |
| FB vs AS | CSAD     | 7.20351E-09 | 3.59594E-07 | -1.730463  |
| FB vs AS | CSMD2    | 3.15688E-06 | 8.94208E-05 | -2.689041  |
| FB vs AS | CSNK1G2  | 0.000109233 | 0.00193014  | -1.13096   |
| FB vs AS | CTSZ     | 0.000280788 | 0.00427596  | 1.175717   |
| FB vs AS | CTTN     | 0           | 0           | -0.9258899 |
| FB vs AS | CUEDC1   | 0.000123127 | 0.00212175  | -0.9647134 |
| FB vs AS | CYB5A    | 6.11928E-05 | 0.00117044  | 0.4237652  |
| FB vs AS | CYBRD1   | 0.00246657  | 0.025782    | 0.9249258  |
| FB vs AS | CYCS     | 0.00120711  | 0.0143564   | 0.6143023  |
| FB vs AS | CYP20A1  | 0.00372023  | 0.0359181   | 0.8302966  |
| FB vs AS | CYP2R1   | 4.66013E-06 | 0.000125609 | -1.080362  |
| FB vs AS | CYP4B1   | 0.00244605  | 0.0256397   | -3.200304  |
| FB vs AS | CYR61    | 0.00018531  | 0.00298967  | 1.837854   |
| FB vs AS | CYSLTR1  | 0.0020203   | 0.0220058   | 2.93491    |
| FB vs AS | CYTL1    | 6.18652E-09 | 3.11622E-07 | 2.09157    |
| FB vs AS | DACT1    | 0.00330308  | 0.0328303   | 0.8862491  |
| FB vs AS | DCAF11   | 2.9291E-05  | 0.000609472 | -0.7232407 |
| FB vs AS | DCAF8    | 0.00315918  | 0.0316829   | -0.7267929 |
| FB vs AS | DCN      | 0           | 0           | 3.685443   |
| FB vs AS | DCTPP1   | 0.00185004  | 0.0206153   | 0.5692988  |
| FB vs AS | DDIT4    | 2.83868E-05 | 0.000596503 | -1.436713  |
| FB vs AS | DDX17    | 1.95421E-08 | 9.02665E-07 | -1.024482  |
| FB vs AS | DDX51    | 0.000348488 | 0.00515188  | -1.190382  |
| FB vs AS | DENND1A  | 4.35254E-07 | 1.50474E-05 | -0.6551479 |
| FB vs AS | DENND3   | 2.47502E-10 | 1.64982E-08 | -1.711936  |
| FB vs AS | DES      | 0.000101808 | 0.00181914  | -1.001371  |
| FB vs AS | DGAT1    | 0.000164006 | 0.00270077  | -0.9507347 |



|          |         |             |             |            |
|----------|---------|-------------|-------------|------------|
| FB vs AS | DGCR8   | 3.60731E-05 | 0.000723541 | -0.9868298 |
| FB vs AS | DGKA    | 1.4489E-05  | 0.000336725 | -1.044561  |
| FB vs AS | DGKD    | 1.16653E-09 | 6.83466E-08 | -1.936455  |
| FB vs AS | DGKG    | 3.87436E-07 | 1.35627E-05 | -2.582562  |
| FB vs AS | DHDDS   | 0.000112296 | 0.00197558  | -0.4383432 |
| FB vs AS | DHX34   | 0.00288636  | 0.0293701   | -0.9190901 |
| FB vs AS | DHX38   | 5.91055E-07 | 1.99383E-05 | -0.8255828 |
| FB vs AS | DIO2    | 2.63599E-10 | 1.74666E-08 | -0.9192376 |
| FB vs AS | DIS3L2  | 0.00208247  | 0.0225285   | -0.7061265 |
| FB vs AS | DLC1    | 0.00554249  | 0.0486807   | 0.6249508  |
| FB vs AS | DLGAP4  | 1.55764E-12 | 1.42129E-10 | -0.5753064 |
| FB vs AS | DLL1    | 0.00378496  | 0.0363539   | -1.96347   |
| FB vs AS | DLX1    | 0.000749924 | 0.00966222  | -2.825828  |
| FB vs AS | DLX2    | 0.00050975  | 0.0070056   | -1.308931  |
| FB vs AS | DMTF1   | 1.25583E-05 | 0.000298078 | -0.89062   |
| FB vs AS | DNAJC11 | 0.000192521 | 0.0030704   | -0.7402251 |
| FB vs AS | DNAJC17 | 2.07577E-05 | 0.000460309 | -1.240003  |
| FB vs AS | DNAJC7  | 0.000150605 | 0.00250603  | -0.5308186 |
| FB vs AS | DNM1L   | 8.0439E-05  | 0.00149241  | -0.6802794 |
| FB vs AS | DNM1P46 | 0.00336373  | 0.0332411   | -1.537562  |
| FB vs AS | DNM2    | 0.000286705 | 0.00436011  | -0.6144944 |
| FB vs AS | DNMT3A  | 2.609E-09   | 1.41416E-07 | -1.313442  |
| FB vs AS | DOCK4   | 2.54075E-06 | 7.3464E-05  | -1.16496   |
| FB vs AS | DOCK8   | 0.00415793  | 0.0392255   | 0.807946   |
| FB vs AS | DOK7    | 0.00104178  | 0.0127441   | -1.143339  |
| FB vs AS | DPF2    | 0.0019099   | 0.0210994   | -0.5620742 |
| FB vs AS | DRD2    | 0.000226745 | 0.0035551   | -1.866533  |
| FB vs AS | DSEL    | 0.00525586  | 0.0468202   | 1.284406   |
| FB vs AS | DST     | 5.44128E-10 | 3.48117E-08 | -0.569961  |
| FB vs AS | DTNB    | 0.000313725 | 0.00470144  | -1.036511  |
| FB vs AS | DUSP15  | 1.91344E-05 | 0.000427718 | -1.731929  |
| FB vs AS | DVL3    | 1.57589E-05 | 0.000363206 | -0.9395135 |
| FB vs AS | DXO     | 0.00277254  | 0.0284722   | -0.8637823 |
| FB vs AS | DYNLL1  | 0.00437283  | 0.0407691   | 1.11781    |
| FB vs AS | DYRK1B  | 0.0047299   | 0.0431584   | -0.7415372 |
| FB vs AS | DYRK3   | 0.00031255  | 0.00469543  | 1.814857   |
| FB vs AS | DZIP1L  | 2.94369E-07 | 1.06049E-05 | -1.964515  |
| FB vs AS | E2F4    | 6.34281E-06 | 0.000164205 | -1.054204  |
| FB vs AS | E4F1    | 2.32923E-05 | 0.000505438 | -1.186773  |
| FB vs AS | EBF4    | 0.000127089 | 0.00217655  | -1.491716  |
| FB vs AS | ECHDC2  | 1.17706E-12 | 1.10109E-10 | -1.170923  |
| FB vs AS | ECI1    | 0.0049408   | 0.0447783   | -0.5105588 |
| FB vs AS | EDC3    | 0.00012308  | 0.00212175  | -0.5800598 |
| FB vs AS | EDNRB   | 0.000486785 | 0.00678209  | 2.531942   |
| FB vs AS | EEF2K   | 4.39976E-05 | 0.000868407 | -1.352616  |
| FB vs AS | EEPDI   | 3.04172E-05 | 0.000627044 | -1.606238  |
| FB vs AS | EFTUD2  | 8.5875E-05  | 0.0015801   | -0.9364178 |

|          |          |             |             |            |
|----------|----------|-------------|-------------|------------|
| FB vs AS | EGR1     | 0.000702117 | 0.00916291  | 1.788146   |
| FB vs AS | EHBP1L1  | 2.22045E-15 | 3.08975E-13 | -1.373231  |
| FB vs AS | EHD2     | 0           | 0           | 0.5222663  |
| FB vs AS | EI24     | 0.00197974  | 0.0216275   | 0.6114351  |
| FB vs AS | EIF3L    | 0.00128349  | 0.0151219   | 0.6127192  |
| FB vs AS | ELL2     | 4.22943E-09 | 2.15998E-07 | -1.294755  |
| FB vs AS | ENGASE   | 2.2879E-11  | 1.80631E-09 | -1.644024  |
| FB vs AS | ENTPD4   | 2.29878E-07 | 8.4221E-06  | -1.042818  |
| FB vs AS | EP400NL  | 2.44874E-05 | 0.000524219 | -0.8412265 |
| FB vs AS | EPHA3    | 0.00278718  | 0.0285962   | 1.607645   |
| FB vs AS | EPHA4    | 2.8839E-05  | 0.000602318 | -1.120394  |
| FB vs AS | EPS8     | 2.29996E-07 | 8.4221E-06  | 0.6923146  |
| FB vs AS | ERC2     | 8.92472E-05 | 0.00162839  | -3.339396  |
| FB vs AS | ERFE     | 4.0602E-06  | 0.000112714 | -1.652803  |
| FB vs AS | ERG      | 0.0013509   | 0.0157965   | -0.627423  |
| FB vs AS | ERLIN2   | 0.00388686  | 0.0371085   | 0.8256182  |
| FB vs AS | ESM1     | 7.81166E-06 | 0.000197187 | 2.176329   |
| FB vs AS | ESPNL    | 0.00481596  | 0.0439077   | -1.597192  |
| FB vs AS | ETV1     | 0.00233541  | 0.0245958   | 0.8077464  |
| FB vs AS | ETV7     | 0.00499785  | 0.045123    | -1.207278  |
| FB vs AS | EXD3     | 2.73108E-10 | 1.78369E-08 | -1.373387  |
| FB vs AS | EXOC3    | 1.23106E-05 | 0.000292825 | -1.04853   |
| FB vs AS | F2R      | 0.000976524 | 0.0121324   | 1.772982   |
| FB vs AS | FAM118A  | 0.00327973  | 0.0326465   | -1.412587  |
| FB vs AS | FAM120C  | 5.18895E-05 | 0.00100809  | -1.249065  |
| FB vs AS | FAM149A  | 3.23051E-07 | 1.15263E-05 | 0.6588198  |
| FB vs AS | FAM150B  | 0.00455294  | 0.0419911   | -2.712618  |
| FB vs AS | FAM160B2 | 1.29785E-12 | 1.20397E-10 | -1.223938  |
| FB vs AS | FAM193A  | 1.7642E-08  | 8.21719E-07 | -0.950282  |
| FB vs AS | FAM193B  | 1.45284E-09 | 8.29387E-08 | -1.055358  |
| FB vs AS | FAM229A  | 0.00118661  | 0.0141579   | -1.400645  |
| FB vs AS | FAM84A   | 1.23701E-08 | 5.85976E-07 | -2.490987  |
| FB vs AS | FBF1     | 0.00559587  | 0.0489727   | -0.8869873 |
| FB vs AS | FBLIM1   | 3.42642E-09 | 1.78238E-07 | -0.6596678 |
| FB vs AS | FBN1     | 0.000163755 | 0.00270063  | 0.7567235  |
| FB vs AS | FBRSL1   | 1.39997E-05 | 0.000327404 | -1.54923   |
| FB vs AS | FBXL19   | 2.00798E-07 | 7.45096E-06 | -1.517706  |
| FB vs AS | FBXL22   | 0.000180552 | 0.00293845  | -1.567485  |
| FB vs AS | FBXL6    | 0.000828489 | 0.0105162   | -1.115726  |
| FB vs AS | FBXO31   | 0.00363125  | 0.0352424   | -1.43152   |
| FB vs AS | FECH     | 0.000114842 | 0.00201009  | -0.6235021 |
| FB vs AS | FGFR1OP2 | 0.000501384 | 0.00693343  | -0.4548618 |
| FB vs AS | FGFRL1   | 6.07287E-08 | 2.54147E-06 | -0.9103189 |
| FB vs AS | FHL2     | 0.000118608 | 0.00205661  | 0.840327   |
| FB vs AS | FKBP5    | 9.3386E-10  | 5.61931E-08 | -2.461547  |
| FB vs AS | FLRT2    | 0.00471586  | 0.0430656   | 1.745618   |
| FB vs AS | FLYWCH1  | 0.0051612   | 0.0461111   | -0.8393353 |

|          |         |             |             |            |
|----------|---------|-------------|-------------|------------|
| FB vs AS | FMNL3   | 4.12337E-13 | 4.06207E-11 | 1.230525   |
| FB vs AS | FMOD    | 6.54519E-07 | 2.18147E-05 | 1.591311   |
| FB vs AS | FNBP4   | 2.75091E-12 | 2.44985E-10 | -1.410377  |
| FB vs AS | FNDC5   | 0.0005728   | 0.00774776  | -2.599956  |
| FB vs AS | FOXD2   | 0.000104431 | 0.00185707  | -1.616566  |
| FB vs AS | FOXL1   | 1.00595E-05 | 0.000247201 | -1.792161  |
| FB vs AS | FOXS1   | 0.00204934  | 0.022244    | 1.630846   |
| FB vs AS | FPGS    | 1.23126E-06 | 3.83932E-05 | -1.634255  |
| FB vs AS | FRAS1   | 0.00163754  | 0.0185067   | 0.7402131  |
| FB vs AS | FREM1   | 0.0010672   | 0.0129837   | -0.7268199 |
| FB vs AS | FRZB    | 0.000303015 | 0.0045645   | 1.864735   |
| FB vs AS | FST     | 0.0019453   | 0.0213694   | 2.911156   |
| FB vs AS | FSTL1   | 0.00133931  | 0.0156773   | 0.9547881  |
| FB vs AS | FSTL3   | 2.19868E-05 | 0.000479916 | -0.8477144 |
| FB vs AS | FXYD5   | 6.53723E-05 | 0.00123763  | 0.8079027  |
| FB vs AS | FZD8    | 0.000304247 | 0.00457687  | 1.834627   |
| FB vs AS | G6PD    | 0.00288228  | 0.0293555   | -0.7152504 |
| FB vs AS | GAB2    | 1.70281E-05 | 0.000388436 | -0.7679195 |
| FB vs AS | GAD1    | 1.76124E-09 | 9.86041E-08 | -3.17197   |
| FB vs AS | GADD45G | 0.000116491 | 0.00203257  | -1.716201  |
| FB vs AS | GAL3ST4 | 0           | 0           | 1.432739   |
| FB vs AS | GALM    | 0.00552245  | 0.048636    | 0.9774858  |
| FB vs AS | GALNT11 | 4.22246E-05 | 0.000836378 | 0.6550119  |
| FB vs AS | GALNT5  | 0.000239649 | 0.00372074  | 2.149904   |
| FB vs AS | GARNL3  | 0.000105526 | 0.00187354  | -1.08497   |
| FB vs AS | GAS8    | 0           | 0           | -1.92478   |
| FB vs AS | GBA2    | 0.00147159  | 0.0169935   | -0.8511767 |
| FB vs AS | GBP1    | 0.00121883  | 0.014434    | -1.021664  |
| FB vs AS | GCNT2   | 1.79743E-07 | 6.75979E-06 | -1.63171   |
| FB vs AS | GFAP    | 0           | 0           | -3.960166  |
| FB vs AS | GFOD1   | 0.00259205  | 0.0268166   | -1.305214  |
| FB vs AS | GFRA1   | 0.000259088 | 0.00397816  | -1.699501  |
| FB vs AS | GGA1    | 0.000740026 | 0.00955681  | -0.9344437 |
| FB vs AS | GGA3    | 7.51322E-05 | 0.00140096  | -0.8831893 |
| FB vs AS | GGT7    | 9.55714E-05 | 0.00172652  | -1.132503  |
| FB vs AS | GIGYF1  | 8.00653E-07 | 2.59095E-05 | -2.001092  |
| FB vs AS | GIGYF2  | 1.77024E-06 | 5.26907E-05 | -0.5940986 |
| FB vs AS | GIPC1   | 0.000381789 | 0.00551958  | -0.9015274 |
| FB vs AS | GIT2    | 2.85001E-06 | 8.19801E-05 | -0.3969828 |
| FB vs AS | GJC1    | 0.00484735  | 0.0441216   | -0.9597099 |
| FB vs AS | GLI2    | 0.000121441 | 0.00209919  | -1.674276  |
| FB vs AS | GLIPR2  | 0.00434963  | 0.040655    | -0.8514057 |
| FB vs AS | GLIS3   | 0.0018826   | 0.0209152   | -0.7586036 |
| FB vs AS | GLRB    | 8.46597E-05 | 0.0015655   | 1.849439   |
| FB vs AS | GLYCTK  | 3.45031E-05 | 0.000699317 | -1.088256  |
| FB vs AS | GLYR1   | 0.00409335  | 0.0387761   | -0.7085845 |
| FB vs AS | GMPR    | 0.00145783  | 0.0168521   | -0.8186064 |

|          |           |             |             |            |
|----------|-----------|-------------|-------------|------------|
| FB vs AS | GOLGA2P5  | 0.00487793  | 0.0443461   | -1.647927  |
| FB vs AS | GOLGA6L4  | 7.64014E-09 | 3.79687E-07 | -2.314591  |
| FB vs AS | GOLGA8O   | 1.4187E-05  | 0.000331089 | -1.470475  |
| FB vs AS | GOLGA8R   | 3.38314E-05 | 0.000687246 | -1.378953  |
| FB vs AS | GPAT2     | 1.37769E-10 | 9.64557E-09 | 1.125474   |
| FB vs AS | GPC4      | 0.00433632  | 0.0405647   | 1.220134   |
| FB vs AS | GPX3      | 2.14603E-05 | 0.000469443 | 1.036012   |
| FB vs AS | GRB10     | 8.79795E-05 | 0.00160914  | -0.9879352 |
| FB vs AS | GREB1L    | 1.94137E-07 | 7.22789E-06 | -1.567037  |
| FB vs AS | GRIA2     | 2.14217E-05 | 0.000469443 | 0.6292467  |
| FB vs AS | GSG1L     | 0.000645584 | 0.00856572  | 1.324369   |
| FB vs AS | GSTM1     | 0.000535962 | 0.0072938   | -2.816653  |
| FB vs AS | GSTM2     | 0.000169084 | 0.00277209  | -0.6745549 |
| FB vs AS | GTPBP3    | 2.5266E-09  | 1.38552E-07 | -1.747033  |
| FB vs AS | H1FNT     | 0.000644009 | 0.00855502  | -1.535942  |
| FB vs AS | HAPLN1    | 1.82077E-14 | 2.17944E-12 | 2.571024   |
| FB vs AS | HAUS7     | 1.36802E-06 | 4.19527E-05 | -0.7367263 |
| FB vs AS | HCFC1R1   | 5.08597E-05 | 0.000993282 | 0.6984885  |
| FB vs AS | HDAC10    | 0.000921912 | 0.0115312   | -0.8466733 |
| FB vs AS | HDAC6     | 1.30999E-06 | 4.07328E-05 | -1.041012  |
| FB vs AS | HDAC7     | 1.50724E-12 | 1.38666E-10 | -1.159711  |
| FB vs AS | HECTD3    | 0.00345786  | 0.0339443   | -0.7156898 |
| FB vs AS | HECTD4    | 0.000460676 | 0.00648325  | -1.147966  |
| FB vs AS | HEPH      | 1.37126E-09 | 7.8898E-08  | 0.6467603  |
| FB vs AS | HERC2     | 0.00441081  | 0.0410544   | -0.7248708 |
| FB vs AS | HGS       | 7.76452E-07 | 2.53474E-05 | -1.085332  |
| FB vs AS | HIF1A     | 0.00366197  | 0.0354479   | -0.7212613 |
| FB vs AS | HIF3A     | 0           | 0           | -3.341685  |
| FB vs AS | HINFP     | 4.896E-06   | 0.000130701 | -1.349423  |
| FB vs AS | HIP1R     | 0           | 0           | -3.781329  |
| FB vs AS | HLA-DPA1  | 2.88658E-15 | 3.91871E-13 | 1.954569   |
| FB vs AS | HLA-DQA1  | 0           | 0           | 2.822928   |
| FB vs AS | HLA-DQB1  | 0.000358771 | 0.00524126  | 1.596512   |
| FB vs AS | HLA-DRB1  | 0.000718193 | 0.00932897  | 2.143701   |
| FB vs AS | HLA-DRB5  | 0.00234885  | 0.0246907   | 1.70858    |
| FB vs AS | HMG20B    | 1.59806E-05 | 0.000366933 | -0.8580062 |
| FB vs AS | HMGN1     | 4.59998E-05 | 0.000903122 | -0.6985893 |
| FB vs AS | HNRNPH1   | 2.90299E-10 | 1.87884E-08 | -0.6219834 |
| FB vs AS | HPR       | 0.0039455   | 0.0376038   | 1.847328   |
| FB vs AS | HS3ST2    | 2.17706E-11 | 1.73107E-09 | -3.298399  |
| FB vs AS | HS6ST3    | 6.8112E-07  | 2.26335E-05 | -3.470236  |
| FB vs AS | HSD17B7P2 | 0.0010287   | 0.0126396   | -1.089311  |
| FB vs AS | HSF1      | 0.00215004  | 0.0230405   | -0.8017551 |
| FB vs AS | HSP90B1   | 0           | 0           | 0.7884235  |
| FB vs AS | HSPB6     | 7.43127E-06 | 0.000188439 | 0.4614981  |
| FB vs AS | HTRA1     | 0.00154457  | 0.0176314   | 0.9022634  |
| FB vs AS | HTRA3     | 1.062E-05   | 0.000257564 | -1.408274  |

|          |               |             |             |            |
|----------|---------------|-------------|-------------|------------|
| FB vs AS | IDUA          | 0.000189552 | 0.00303611  | -1.063484  |
| FB vs AS | IFI27         | 0.000104001 | 0.00185238  | 2.820052   |
| FB vs AS | IFI44         | 1.18606E-05 | 0.000283941 | 1.237786   |
| FB vs AS | IFI44L        | 0.000432062 | 0.00611922  | 1.962189   |
| FB vs AS | IFRD2         | 0.000796103 | 0.0101748   | -0.4061033 |
| FB vs AS | IGF2          | 6.27342E-07 | 2.10349E-05 | 3.23667    |
| FB vs AS | IGFBP2        | 1.38833E-10 | 9.65929E-09 | 0.8285404  |
| FB vs AS | IGHMBP2       | 2.56337E-09 | 1.3988E-07  | -1.5692    |
| FB vs AS | IGSF10        | 0.000256482 | 0.00395452  | -1.880065  |
| FB vs AS | IKBIP         | 0.0034104   | 0.0335877   | 0.9161922  |
| FB vs AS | IKBKB         | 0           | 0           | -1.539927  |
| FB vs AS | IL17RE        | 0.0020309   | 0.0220997   | -0.4564504 |
| FB vs AS | IL32          | 8.00573E-07 | 2.59095E-05 | 0.7826818  |
| FB vs AS | IL34          | 1.55431E-15 | 2.1902E-13  | 1.631178   |
| FB vs AS | ILKAP         | 7.16235E-06 | 0.00018329  | -1.077723  |
| FB vs AS | INHBA         | 0.000579527 | 0.00782502  | 1.742614   |
| FB vs AS | INMT          | 4.26042E-07 | 1.47748E-05 | 1.381422   |
| FB vs AS | INO80E        | 1.12903E-05 | 0.000272043 | -0.9852128 |
| FB vs AS | INPP4A        | 0.00183619  | 0.0205019   | -0.8303343 |
| FB vs AS | INPP5K        | 0.00245749  | 0.0257112   | -0.510384  |
| FB vs AS | INPPL1        | 2.25467E-08 | 1.02445E-06 | -1.142182  |
| FB vs AS | IP6K2         | 1.05582E-08 | 5.20062E-07 | -1.276843  |
| FB vs AS | IRF3          | 1.19636E-08 | 5.70492E-07 | -0.6841847 |
| FB vs AS | ISM1          | 6.66134E-16 | 9.75711E-14 | -5.192177  |
| FB vs AS | ITFG1         | 9.00562E-10 | 5.50827E-08 | 0.6507983  |
| FB vs AS | ITGA5         | 0           | 0           | -2.443305  |
| FB vs AS | ITGA9         | 0.000350379 | 0.00516464  | -0.9551983 |
| FB vs AS | ITGB1BP1      | 2.14648E-05 | 0.000469443 | 0.4827426  |
| FB vs AS | ITGB2         | 0.00012542  | 0.0021546   | 0.7025761  |
| FB vs AS | ITGBL1        | 6.3598E-12  | 5.57459E-10 | 1.327069   |
| FB vs AS | ITIH4         | 0           | 0           | -2.60729   |
| FB vs AS | ITLN1         | 0.00084633  | 0.0107061   | 1.566177   |
| FB vs AS | ITM2B         | 1.11671E-05 | 0.000269657 | 0.8994781  |
| FB vs AS | ITM2C         | 0.000661754 | 0.00873861  | -1.180376  |
| FB vs AS | ITPKB         | 9.85923E-06 | 0.000242816 | -0.5725669 |
| FB vs AS | IVNS1ABP      | 0.00149312  | 0.0171709   | 0.4931391  |
| FB vs AS | JMJD7-PLA2G4B | 6.12498E-06 | 0.00015968  | -1.979963  |
| FB vs AS | JPH1          | 0.000426789 | 0.00606771  | -2.164706  |
| FB vs AS | KALRN         | 0           | 0           | -1.779362  |
| FB vs AS | KANK2         | 9.37623E-07 | 2.99931E-05 | -0.8535925 |
| FB vs AS | KANSL1        | 1.47841E-06 | 4.49663E-05 | -1.47134   |
| FB vs AS | KANSL3        | 9.58143E-08 | 3.85056E-06 | -0.8851714 |
| FB vs AS | KAT5          | 0.0042026   | 0.0395798   | -0.4341403 |
| FB vs AS | KBTBD13       | 0.00548463  | 0.0483794   | -0.8672618 |
| FB vs AS | KCNE1         | 0.00163213  | 0.0184643   | -3.067204  |
| FB vs AS | KCNK9         | 0.0038666   | 0.0369785   | -2.182013  |
| FB vs AS | KCNMB3        | 0.000954778 | 0.0118784   | -1.087167  |

|          |              |             |             |            |
|----------|--------------|-------------|-------------|------------|
| FB vs AS | KCTD13       | 0.00290057  | 0.0294878   | -0.9732005 |
| FB vs AS | KCTD8        | 0.000691084 | 0.00904013  | -1.220227  |
| FB vs AS | KDELC2       | 4.08209E-08 | 1.76131E-06 | 0.7441179  |
| FB vs AS | KDM2A        | 0.00514185  | 0.0460491   | -1.087448  |
| FB vs AS | KDM3A        | 3.24746E-07 | 1.15286E-05 | -0.6283871 |
| FB vs AS | KDM5C        | 0.00185326  | 0.0206305   | -0.7283317 |
| FB vs AS | KIAA0513     | 0.000707751 | 0.0092227   | -1.78481   |
| FB vs AS | KIAA0754     | 0.00163004  | 0.0184594   | -0.4003069 |
| FB vs AS | KIAA0895L    | 1.03164E-05 | 0.000252956 | -1.553818  |
| FB vs AS | KIAA0907     | 0.00465086  | 0.0426469   | -0.8259271 |
| FB vs AS | KIAA1456     | 0.00457158  | 0.0420933   | -1.609324  |
| FB vs AS | KIAA1614     | 0.00372913  | 0.0359417   | -0.8972391 |
| FB vs AS | KIAA1683     | 4.70177E-07 | 1.61544E-05 | -0.9112821 |
| FB vs AS | KIF5C        | 0.000986296 | 0.0122266   | -1.595374  |
| FB vs AS | KIF7         | 7.13288E-06 | 0.000182957 | -1.496896  |
| FB vs AS | KIFC2        | 3.0668E-07  | 1.10128E-05 | -1.811068  |
| FB vs AS | KIFC3        | 1.70208E-05 | 0.000388436 | -0.9888176 |
| FB vs AS | KL           | 5.62876E-05 | 0.0010822   | 1.476737   |
| FB vs AS | KLC1         | 0.000604199 | 0.00806469  | -0.83658   |
| FB vs AS | KLF10        | 0.00317659  | 0.0318288   | 1.552827   |
| FB vs AS | KLF15        | 0.000229939 | 0.00360011  | -2.044     |
| FB vs AS | KLF2         | 2.1361E-05  | 0.000469443 | 1.305589   |
| FB vs AS | KLHDC4       | 0           | 0           | -1.611539  |
| FB vs AS | KLHL3        | 1.31361E-06 | 4.07328E-05 | -1.02256   |
| FB vs AS | KLHL42       | 5.28835E-05 | 0.00102382  | -1.485079  |
| FB vs AS | KMT2C        | 0.000746021 | 0.00962306  | -1.119814  |
| FB vs AS | KMT5A        | 0           | 0           | -0.9859334 |
| FB vs AS | KRBA1        | 6.17209E-06 | 0.000160158 | -1.499524  |
| FB vs AS | KRT16        | 0.00150708  | 0.0172957   | 1.465669   |
| FB vs AS | KRT7         | 5.05178E-05 | 0.000990077 | 2.707937   |
| FB vs AS | KY           | 0.00501449  | 0.0452235   | -1.150958  |
| FB vs AS | L3MBTL1      | 5.96454E-07 | 2.00596E-05 | -1.822404  |
| FB vs AS | LAMA5        | 1.06204E-12 | 1.00192E-10 | -1.414153  |
| FB vs AS | LAMC2        | 5.71468E-05 | 0.00109683  | -1.876753  |
| FB vs AS | LAMP1        | 3.18912E-11 | 2.44836E-09 | 0.6521115  |
| FB vs AS | LAT          | 0.000294631 | 0.00446235  | -1.2898    |
| FB vs AS | LDLRAD3      | 0.00436473  | 0.0407277   | 1.086847   |
| FB vs AS | LEMD2        | 0.000822096 | 0.010447    | -0.822916  |
| FB vs AS | LIMA1        | 1.82204E-05 | 0.000410586 | -0.6696733 |
| FB vs AS | LIMS2        | 0.00113372  | 0.0136144   | -0.5808296 |
| FB vs AS | LMBR1        | 0.000128427 | 0.00219271  | -0.8828815 |
| FB vs AS | LMBR1L       | 2.91675E-05 | 0.000608038 | -1.030883  |
| FB vs AS | LMO2         | 0.00249152  | 0.0259211   | -1.652848  |
| FB vs AS | LOC100505585 | 1.00364E-13 | 1.04416E-11 | -1.12093   |
| FB vs AS | LOC100506403 | 0           | 0           | 1.559863   |
| FB vs AS | LOC100996693 | 0           | 0           | -2.799733  |
| FB vs AS | LOC101928160 | 0.00143834  | 0.0166788   | -0.971     |

|          |              |             |             |            |
|----------|--------------|-------------|-------------|------------|
| FB vs AS | LOC101928168 | 3.02404E-09 | 1.60002E-07 | 1.895004   |
| FB vs AS | LOC105371397 | 0           | 0           | -1.519428  |
| FB vs AS | LOX          | 4.45163E-06 | 0.000120867 | 1.474259   |
| FB vs AS | LPIN1        | 1.191E-05   | 0.000284028 | -0.5582589 |
| FB vs AS | LPIN3        | 0.000257492 | 0.00395912  | -1.450511  |
| FB vs AS | LPXN         | 0.00403141  | 0.0382915   | -1.274457  |
| FB vs AS | LRP11        | 0.00211912  | 0.0228808   | 1.486325   |
| FB vs AS | LRP8         | 0.000553502 | 0.00750498  | -1.686903  |
| FB vs AS | LRRRC37A2    | 1.7939E-12  | 1.62355E-10 | -2.295347  |
| FB vs AS | LRRRC37A3    | 0.00044967  | 0.00635244  | -1.928177  |
| FB vs AS | LRRRC37B     | 5.39535E-11 | 4.00407E-09 | -0.9950965 |
| FB vs AS | LRRFIP1      | 0.00247278  | 0.0258227   | -0.4902079 |
| FB vs AS | LRRFIP2      | 0.000771007 | 0.00989948  | -1.096867  |
| FB vs AS | LRSAM1       | 0.000176972 | 0.00288441  | -0.8566677 |
| FB vs AS | LSM14B       | 0.00103854  | 0.0127185   | -0.5292526 |
| FB vs AS | LSP1         | 0.0010699   | 0.0130023   | 0.5161185  |
| FB vs AS | LSS          | 3.2705E-07  | 1.15578E-05 | -1.107521  |
| FB vs AS | LTB4R2       | 0.000231873 | 0.00361009  | -0.9803348 |
| FB vs AS | LTBP1        | 5.82179E-06 | 0.000153574 | 0.5176228  |
| FB vs AS | LTBP4        | 0           | 0           | 0.5646512  |
| FB vs AS | LUM          | 3.50293E-06 | 9.84714E-05 | 2.010085   |
| FB vs AS | LZTR1        | 2.83998E-05 | 0.000596503 | -1.051256  |
| FB vs AS | LZTS3        | 0.00120336  | 0.014327    | -0.7110334 |
| FB vs AS | MACF1        | 0.00163004  | 0.0184594   | -0.401531  |
| FB vs AS | MAD1L1       | 0.0026619   | 0.0274119   | -0.7459635 |
| FB vs AS | MADD         | 0.00442155  | 0.04112     | -0.622156  |
| FB vs AS | MAFG         | 0.0024788   | 0.0258613   | -1.310065  |
| FB vs AS | MAGEC3       | 1.3577E-06  | 4.18668E-05 | -1.317482  |
| FB vs AS | MAGI1        | 0.000764054 | 0.00982154  | -0.6430426 |
| FB vs AS | MAMLD1       | 1.63072E-07 | 6.19563E-06 | -0.5418621 |
| FB vs AS | MAP3K10      | 9.03722E-14 | 9.49078E-12 | -1.801164  |
| FB vs AS | MAP3K11      | 9.29434E-05 | 0.00168509  | -0.8365704 |
| FB vs AS | MAP4K2       | 0.000521795 | 0.00713589  | -1.362255  |
| FB vs AS | MAP7         | 3.66921E-05 | 0.000734635 | -1.783735  |
| FB vs AS | MAP7D3       | 4.60667E-08 | 1.95731E-06 | -0.9311937 |
| FB vs AS | MAP9         | 0.000313796 | 0.00470144  | 0.5831121  |
| FB vs AS | MAPK12       | 1.42154E-10 | 9.74889E-09 | -1.962827  |
| FB vs AS | MAPK4        | 0.0012837   | 0.0151219   | -1.451081  |
| FB vs AS | MAPK8IP3     | 0           | 0           | -1.843769  |
| FB vs AS | MAPKAPK5     | 0.00468753  | 0.0429125   | -0.4182363 |
| FB vs AS | MAPKBP1      | 9.45524E-08 | 3.81361E-06 | -1.295955  |
| FB vs AS | MAPRE2       | 0.00232992  | 0.0245846   | 1.026409   |
| FB vs AS | MAPRE3       | 9.04654E-08 | 3.6754E-06  | -0.8801744 |
| FB vs AS | MARCH3       | 0.00100422  | 0.0124073   | -2.872772  |
| FB vs AS | MARCKSL1     | 0.00255978  | 0.0265321   | 2.120088   |
| FB vs AS | MASP1        | 1.08708E-08 | 5.28442E-07 | 3.611672   |
| FB vs AS | MATN2        | 2.05114E-11 | 1.65458E-09 | 1.706164   |

|          |         |             |             |            |
|----------|---------|-------------|-------------|------------|
| FB vs AS | MAU2    | 7.52608E-07 | 2.47871E-05 | -1.088259  |
| FB vs AS | MBD1    | 0           | 0           | -0.975631  |
| FB vs AS | MBD6    | 1.09159E-09 | 6.49816E-08 | -1.247377  |
| FB vs AS | MCCC1   | 5.50197E-05 | 0.00105965  | -0.8554475 |
| FB vs AS | MCF2L   | 0           | 0           | -3.323654  |
| FB vs AS | MDM1    | 0.00168066  | 0.0189363   | -0.8513554 |
| FB vs AS | MDM4    | 2.22045E-16 | 3.38603E-14 | -0.9538968 |
| FB vs AS | MED15   | 1.72204E-05 | 0.00039122  | -0.9089984 |
| FB vs AS | MED22   | 2.45383E-08 | 1.10591E-06 | -1.246044  |
| FB vs AS | MED24   | 1.47722E-05 | 0.000342592 | -0.789445  |
| FB vs AS | MED25   | 0.00298084  | 0.0301387   | -0.4652802 |
| FB vs AS | MEIS1   | 2.44209E-05 | 0.000523803 | -1.245603  |
| FB vs AS | MEIS2   | 1.53286E-06 | 4.64954E-05 | -0.3939376 |
| FB vs AS | MEN1    | 2.34035E-13 | 2.36843E-11 | -1.227562  |
| FB vs AS | MEOX2   | 0.00213852  | 0.0230144   | 1.983599   |
| FB vs AS | MET     | 1.5361E-07  | 5.89651E-06 | 2.441395   |
| FB vs AS | METTL17 | 2.02961E-08 | 9.29777E-07 | -0.7191851 |
| FB vs AS | METTL22 | 3.4861E-14  | 3.95993E-12 | -0.9047843 |
| FB vs AS | MFAP2   | 0.00453627  | 0.0419069   | -1.057642  |
| FB vs AS | MGAM    | 0.0035819   | 0.0349769   | 2.20035    |
| FB vs AS | MGAT4B  | 7.57316E-10 | 4.76296E-08 | -0.4962563 |
| FB vs AS | MGAT4C  | 0.00173234  | 0.0194989   | 4.035847   |
| FB vs AS | MGLL    | 0.00013557  | 0.00229008  | 1.023871   |
| FB vs AS | MIB2    | 0.00564476  | 0.0492457   | -0.7214227 |
| FB vs AS | MICA    | 0.000354367 | 0.00520424  | -1.80178   |
| FB vs AS | MICAL3  | 2.88658E-15 | 3.91871E-13 | -1.883477  |
| FB vs AS | MICALCL | 0.000293477 | 0.00445093  | -1.910469  |
| FB vs AS | MICALL2 | 6.66134E-16 | 9.75711E-14 | -1.30157   |
| FB vs AS | MIGA2   | 0.000582027 | 0.00782502  | -1.36581   |
| FB vs AS | MINK1   | 0.000653236 | 0.00864664  | -0.6141737 |
| FB vs AS | MKL2    | 0.00157498  | 0.0179454   | -0.8966314 |
| FB vs AS | MLLT4   | 2.77156E-07 | 1.00499E-05 | -0.8193305 |
| FB vs AS | MMP2    | 2.64457E-08 | 1.17288E-06 | 0.9258338  |
| FB vs AS | MMP9    | 1.87914E-05 | 0.000420898 | 2.740444   |
| FB vs AS | MOB2    | 0.00190548  | 0.0210994   | -0.768126  |
| FB vs AS | MOV10   | 0.00444332  | 0.0412782   | -1.160335  |
| FB vs AS | MPP3    | 0.00470841  | 0.0430405   | -1.39641   |
| FB vs AS | MROH7   | 0.000508264 | 0.0070056   | -0.7713075 |
| FB vs AS | MRPL38  | 1.15347E-09 | 6.79389E-08 | -0.7226384 |
| FB vs AS | MSL3    | 0.000162    | 0.00268361  | -0.5777437 |
| FB vs AS | MSTO1   | 0.000509621 | 0.0070056   | -0.9456398 |
| FB vs AS | MT2A    | 0.000581083 | 0.00782502  | -0.7036942 |
| FB vs AS | MTA1    | 8.89124E-10 | 5.46836E-08 | -1.273664  |
| FB vs AS | MTHFR   | 2.0157E-11  | 1.63787E-09 | -2.018826  |
| FB vs AS | MTMR11  | 5.05518E-07 | 1.7262E-05  | -0.5210586 |
| FB vs AS | MTSS1L  | 0.00157848  | 0.0179486   | -1.087084  |
| FB vs AS | MUS81   | 1.11203E-08 | 5.36351E-07 | -1.143289  |



|          |          |             |             |            |
|----------|----------|-------------|-------------|------------|
| FB vs AS | MUSTN1   | 1.60002E-07 | 6.0998E-06  | -2.434544  |
| FB vs AS | MX1      | 0.000200209 | 0.00317936  | 1.164971   |
| FB vs AS | MXD1     | 4.52597E-05 | 0.000891737 | -1.065744  |
| FB vs AS | MXD3     | 0.000225317 | 0.0035377   | -1.398482  |
| FB vs AS | MXRA5    | 4.22993E-09 | 2.15998E-07 | 3.009399   |
| FB vs AS | MYC      | 0.00298066  | 0.0301387   | 0.7983143  |
| FB vs AS | MYH1     | 0.000627839 | 0.00836017  | 2.012051   |
| FB vs AS | MYH13    | 6.96312E-05 | 0.00131157  | 1.825496   |
| FB vs AS | MYH2     | 0.000462146 | 0.00649572  | 2.816444   |
| FB vs AS | MYH4     | 0.00542576  | 0.0478982   | 2.850941   |
| FB vs AS | MYH6     | 0.0051531   | 0.0460758   | 1.246727   |
| FB vs AS | MYH8     | 0.0035886   | 0.034981    | 2.713186   |
| FB vs AS | MYLK     | 0.000364204 | 0.00530343  | -0.5890378 |
| FB vs AS | MYO15B   | 0.00416935  | 0.0392999   | -0.8004571 |
| FB vs AS | MYO1D    | 1.88022E-07 | 7.04734E-06 | 0.8329564  |
| FB vs AS | MYO1E    | 0.00501716  | 0.0452235   | -0.6005304 |
| FB vs AS | MYO5B    | 2.86283E-05 | 0.00059936  | -1.329346  |
| FB vs AS | MYO6     | 0.000182032 | 0.00295822  | -0.8989372 |
| FB vs AS | NAA40    | 3.20293E-05 | 0.00065663  | -1.40337   |
| FB vs AS | NADSYN1  | 2.35856E-07 | 8.60835E-06 | -0.9465475 |
| FB vs AS | NASP     | 0           | 0           | -1.12082   |
| FB vs AS | NAT1     | 0.00328166  | 0.0326465   | 1.012262   |
| FB vs AS | NAT9     | 1.05826E-05 | 0.000257217 | -1.254975  |
| FB vs AS | NAV1     | 0.000189368 | 0.00303611  | -1.008722  |
| FB vs AS | NAV2     | 9.54792E-15 | 1.18097E-12 | -2.016627  |
| FB vs AS | NCOA5    | 0.00286929  | 0.02925     | -1.041902  |
| FB vs AS | NDRG1    | 0.00323716  | 0.0323194   | 0.9239827  |
| FB vs AS | NDUFS2   | 0.00112201  | 0.0134883   | -0.5014994 |
| FB vs AS | NECAB3   | 2.16338E-11 | 1.73107E-09 | -2.082309  |
| FB vs AS | NECTIN3  | 0.00499626  | 0.045123    | 0.3898437  |
| FB vs AS | NEIL1    | 0.00095501  | 0.0118784   | -1.262788  |
| FB vs AS | NEK8     | 0.00492186  | 0.0446537   | -1.553058  |
| FB vs AS | NELFA    | 2.61147E-12 | 2.34442E-10 | -0.8119906 |
| FB vs AS | NEXN     | 0           | 0           | -0.5782607 |
| FB vs AS | NFATC2IP | 0.000351469 | 0.0051685   | -1.529577  |
| FB vs AS | NFATC4   | 0           | 0           | -1.761388  |
| FB vs AS | NFKB2    | 0.00525739  | 0.0468202   | -0.5359679 |
| FB vs AS | NGEF     | 8.61235E-05 | 0.00158206  | 2.06141    |
| FB vs AS | NIN      | 0.00191542  | 0.0211322   | -0.4759154 |
| FB vs AS | NINL     | 4.92391E-06 | 0.000131132 | -1.653409  |
| FB vs AS | NKAIN2   | 0.00303185  | 0.0305988   | 5.432061   |
| FB vs AS | NKD1     | 0.00124756  | 0.0147585   | -1.456083  |
| FB vs AS | NLGN4Y   | 0.0012868   | 0.0151228   | 0.8638706  |
| FB vs AS | NLRP3    | 0.000356333 | 0.00522089  | 1.138843   |
| FB vs AS | NME7     | 0.00183886  | 0.0205112   | 0.5200894  |
| FB vs AS | NOV      | 8.02249E-06 | 0.000201595 | 1.680573   |
| FB vs AS | NOVA1    | 3.83699E-07 | 1.35119E-05 | -1.718298  |

|          |         |             |             |            |
|----------|---------|-------------|-------------|------------|
| FB vs AS | NOX4    | 0.000127824 | 0.00218577  | 0.8701803  |
| FB vs AS | NPAS2   | 2.82996E-09 | 1.52189E-07 | -1.554691  |
| FB vs AS | NPC2    | 0.000466368 | 0.0065468   | 0.5783332  |
| FB vs AS | NPEPPS  | 0.000498938 | 0.00691678  | -0.8184886 |
| FB vs AS | NPHP3   | 0.00327218  | 0.0326397   | -0.7416664 |
| FB vs AS | NPIPA2  | 0.000837546 | 0.0106191   | -1.177629  |
| FB vs AS | NPIPB4  | 2.29674E-06 | 6.65816E-05 | -1.670151  |
| FB vs AS | NPR3    | 1.2269E-07  | 4.82611E-06 | 1.441955   |
| FB vs AS | NR2C1   | 2.97124E-06 | 8.48098E-05 | -0.912412  |
| FB vs AS | NR3C1   | 1.29347E-09 | 7.49943E-08 | 0.8396166  |
| FB vs AS | NRG1    | 1.59866E-05 | 0.000366933 | 2.964251   |
| FB vs AS | NRXN3   | 0.000293076 | 0.00445091  | 0.7698917  |
| FB vs AS | NSMF    | 4.75362E-06 | 0.000127512 | -1.485134  |
| FB vs AS | NTN1    | 6.48026E-05 | 0.00122893  | -2.041885  |
| FB vs AS | NTRK3   | 0           | 0           | -0.9945891 |
| FB vs AS | NUAK1   | 0.00138893  | 0.0161732   | 1.534377   |
| FB vs AS | NUDCD3  | 0.00448074  | 0.0415317   | -0.7031553 |
| FB vs AS | NUP88   | 0.00259797  | 0.0268529   | -0.6392239 |
| FB vs AS | NVL     | 4.97143E-06 | 0.000131861 | -0.8854312 |
| FB vs AS | OAS1    | 0.000494597 | 0.00688232  | 1.970625   |
| FB vs AS | OAT     | 3.96437E-06 | 0.000110605 | 0.633848   |
| FB vs AS | ODF2L   | 0.00333259  | 0.0330351   | -0.9705883 |
| FB vs AS | OGN     | 1.12686E-09 | 6.67244E-08 | 1.446003   |
| FB vs AS | OMD     | 1.04153E-05 | 0.000254742 | 2.203284   |
| FB vs AS | OTUD5   | 0.00560474  | 0.0490118   | -0.4459417 |
| FB vs AS | OXTR    | 0.0005179   | 0.00710007  | 2.342446   |
| FB vs AS | PABPC1L | 2.96462E-05 | 0.000614905 | -1.361234  |
| FB vs AS | PAK1    | 0.0035351   | 0.0345806   | -0.4824906 |
| FB vs AS | PAK3    | 0.000506673 | 0.00699787  | -1.330476  |
| FB vs AS | PAM     | 0           | 0           | 0.4506702  |
| FB vs AS | PAM16   | 0.00145699  | 0.0168521   | -0.9874229 |
| FB vs AS | PAMR1   | 0.00174252  | 0.0195739   | 2.956296   |
| FB vs AS | PANK4   | 5.24051E-08 | 2.20141E-06 | -1.247902  |
| FB vs AS | PAPSS2  | 0.00198894  | 0.0217067   | 1.735887   |
| FB vs AS | PARD3   | 0.000550901 | 0.00748795  | -0.7460139 |
| FB vs AS | PAWR    | 6.76203E-05 | 0.00127585  | -1.094108  |
| FB vs AS | PBX2    | 0.00527151  | 0.0469084   | -0.7563249 |
| FB vs AS | PCDH10  | 0.000381143 | 0.0055174   | 1.529398   |
| FB vs AS | PCDH11Y | 0.0057223   | 0.0497661   | -1.129976  |
| FB vs AS | PCDH15  | 0.00038505  | 0.00555229  | -2.267647  |
| FB vs AS | PCDH20  | 8.80314E-05 | 0.00160914  | -1.844663  |
| FB vs AS | PCDHB12 | 0.00190972  | 0.0210994   | -0.5107666 |
| FB vs AS | PCNT    | 0.000132241 | 0.00224065  | -1.204192  |
| FB vs AS | PCSK5   | 0.00016259  | 0.00268939  | -1.315386  |
| FB vs AS | PCSK7   | 0.0024564   | 0.0257112   | -0.9148172 |
| FB vs AS | PDE4DIP | 0           | 0           | -0.9805267 |
| FB vs AS | PDE8B   | 1.92096E-10 | 1.2882E-08  | -1.206825  |

|          |         |             |             |            |
|----------|---------|-------------|-------------|------------|
| FB vs AS | PDIA3   | 4.33712E-05 | 0.000857564 | 0.7273857  |
| FB vs AS | PDK1    | 0.00181872  | 0.0203273   | 1.092686   |
| FB vs AS | PDK4    | 1.28604E-05 | 0.00030331  | -1.783218  |
| FB vs AS | PDPN    | 0.000243354 | 0.00377301  | -2.432836  |
| FB vs AS | PDXDC2P | 8.50474E-06 | 0.000211328 | -1.66736   |
| FB vs AS | PDZD2   | 0.00023164  | 0.00361009  | -1.847552  |
| FB vs AS | PEAK1   | 1.58678E-06 | 4.78699E-05 | 1.020873   |
| FB vs AS | PER1    | 1.02004E-07 | 4.08454E-06 | -0.8213666 |
| FB vs AS | PFKFB3  | 0           | 0           | -1.299319  |
| FB vs AS | PGF     | 1.10212E-06 | 3.46578E-05 | 2.563141   |
| FB vs AS | PHACTR1 | 3.35456E-11 | 2.55774E-09 | -1.53189   |
| FB vs AS | PHC1    | 1.38193E-07 | 5.34154E-06 | -1.071316  |
| FB vs AS | PHF21A  | 0.000117402 | 0.00204422  | -1.166669  |
| FB vs AS | PHF21B  | 0.000383189 | 0.00553263  | -3.177381  |
| FB vs AS | PHLDB1  | 0           | 0           | -1.177853  |
| FB vs AS | PHYHD1  | 4.39285E-08 | 1.87361E-06 | -1.584762  |
| FB vs AS | PI15    | 0.000708355 | 0.0092227   | -2.162571  |
| FB vs AS | PIAS3   | 0           | 0           | -0.8109583 |
| FB vs AS | PICK1   | 0.000230681 | 0.00360665  | -1.170402  |
| FB vs AS | PIGK    | 0.000194152 | 0.00309199  | 0.9825207  |
| FB vs AS | PIK3C2B | 9.4776E-05  | 0.00171552  | -1.524037  |
| FB vs AS | PIK3R3  | 0.00384259  | 0.036862    | -1.250766  |
| FB vs AS | PILRA   | 7.06957E-05 | 0.00132937  | -1.160572  |
| FB vs AS | PIP4K2A | 0.00390883  | 0.0372863   | -0.7551793 |
| FB vs AS | PLA2G4B | 6.12498E-06 | 0.00015968  | -1.396827  |
| FB vs AS | PLA2G6  | 1.30522E-07 | 5.08032E-06 | -1.552634  |
| FB vs AS | PLAT    | 0.000734624 | 0.00951968  | -0.4344082 |
| FB vs AS | PLCB4   | 0.00542083  | 0.0478926   | -0.4718232 |
| FB vs AS | PLCD3   | 8.25701E-06 | 0.000206092 | -0.9657701 |
| FB vs AS | PLCG1   | 0.00322827  | 0.0322595   | -0.6927005 |
| FB vs AS | PLCXD1  | 0.00359263  | 0.0349896   | -1.176639  |
| FB vs AS | PLD4    | 0.000735441 | 0.00951968  | 2.827734   |
| FB vs AS | PLD5    | 1.15815E-06 | 3.63169E-05 | -1.087939  |
| FB vs AS | PLEKHA4 | 2.72869E-10 | 1.78369E-08 | -0.8547729 |
| FB vs AS | PLXDC2  | 0.00059049  | 0.00790065  | 0.8215965  |
| FB vs AS | PLXNA4  | 0.00371085  | 0.0358587   | -1.039089  |
| FB vs AS | PLXNB1  | 0           | 0           | -1.758603  |
| FB vs AS | PNCK    | 1.33061E-06 | 4.11455E-05 | -1.772329  |
| FB vs AS | PNKP    | 9.1031E-10  | 5.53747E-08 | -1.335305  |
| FB vs AS | PNN     | 0.00195513  | 0.0214429   | -0.9101296 |
| FB vs AS | PODNL1  | 2.87131E-06 | 8.23799E-05 | 2.758533   |
| FB vs AS | POLD4   | 3.44129E-11 | 2.60602E-09 | -0.9013274 |
| FB vs AS | POLR2J3 | 7.13651E-13 | 6.90815E-11 | -1.166224  |
| FB vs AS | POLR3E  | 0.00064823  | 0.0085906   | -1.27815   |
| FB vs AS | PON2    | 0.000126763 | 0.00217431  | -0.7858763 |
| FB vs AS | POR     | 7.81406E-11 | 5.64845E-09 | -0.7679621 |
| FB vs AS | POU2F1  | 2.12023E-05 | 0.000468155 | -1.159108  |

|          |          |             |              |            |
|----------|----------|-------------|--------------|------------|
| FB vs AS | PPAN     | 1.32881E-07 | 5.15412E-06  | -0.9300742 |
| FB vs AS | PPDPF    | 6.14492E-06 | 0.000159825  | 0.7390832  |
| FB vs AS | PPFIA2   | 1.08016E-08 | 5.27384E-07  | -1.686568  |
| FB vs AS | PPFIA4   | 3.88471E-08 | 1.68267E-06  | -2.872781  |
| FB vs AS | PPIL2    | 1.14411E-07 | 4.53249E-06  | -1.03818   |
| FB vs AS | PPM1N    | 0.000356439 | 0.00522089   | 2.04988    |
| FB vs AS | PPP1R12A | 7.68163E-05 | 0.00142996   | -0.6519162 |
| FB vs AS | PPP1R13L | 0.00509076  | 0.0457757    | -0.4784323 |
| FB vs AS | PPP1R1A  | 1.82766E-06 | 5.38242E-05  | -2.266586  |
| FB vs AS | PPP1R37  | 1.59839E-07 | 6.0998E-06   | -0.8586864 |
| FB vs AS | PPP5C    | 8.10837E-08 | 3.34305E-06  | -1.497468  |
| FB vs AS | PPP6R2   | 2.22045E-16 | 3.38603E-14  | -1.13792   |
| FB vs AS | PRDM10   | 0.00219506  | 0.023428     | -1.133559  |
| FB vs AS | PRDM11   | 4.35121E-06 | 0.00011872   | -1.18736   |
| FB vs AS | PRDM15   | 0.00512072  | 0.0459338    | -1.651982  |
| FB vs AS | PRDM16   | 2.81585E-05 | 0.000593675  | -1.519509  |
| FB vs AS | PRDM2    | 0.000261153 | 0.00400434   | -0.8033089 |
| FB vs AS | PRELP    | 0.003977    | 0.0378392    | 1.433568   |
| FB vs AS | PRKAR1A  | 0.0015108   | 0.0173205    | 0.3992906  |
| FB vs AS | PRKAR1B  | 6.46141E-05 | 0.00122814   | 0.8440236  |
| FB vs AS | PRKCE    | 0.0043047   | 0.0403366    | -1.34391   |
| FB vs AS | PROSER3  | 3.39993E-08 | 1.48424E-06  | -1.572463  |
| FB vs AS | PRPF38B  | 0.000782558 | 0.0100247    | -1.091757  |
| FB vs AS | PRPF40B  | 1.80665E-05 | 0.000407944  | -1.41502   |
| FB vs AS | PRR4     | 2.58682E-13 | 2.59428E-11  | -1.435603  |
| FB vs AS | PRRT2    | 0.000131819 | 0.00223881   | -1.349569  |
| FB vs AS | PRSS23   | 0.000779535 | 0.00999745   | 1.172483   |
| FB vs AS | PSMD10   | 5.10243E-05 | 0.0009947499 | 0.6430986  |
| FB vs AS | PSRC1    | 0.00279203  | 0.0286196    | -1.181052  |
| FB vs AS | PSTPIP1  | 1.30459E-07 | 5.08032E-06  | -1.196612  |
| FB vs AS | PTGIR    | 6.96909E-12 | 6.06093E-10  | -1.134798  |
| FB vs AS | PTGIS    | 0.00181117  | 0.0202836    | 1.122368   |
| FB vs AS | PTGS1    | 0           | 0            | 2.853011   |
| FB vs AS | PTHLH    | 0.00105418  | 0.0128534    | -1.092348  |
| FB vs AS | PTPN3    | 0.00029798  | 0.00450695   | -0.9085953 |
| FB vs AS | PTPRD    | 1.40598E-06 | 4.28803E-05  | -1.237169  |
| FB vs AS | PUS1     | 0.0014991   | 0.0172218    | -1.07129   |
| FB vs AS | PXN      | 1.55431E-15 | 2.1902E-13   | -1.55237   |
| FB vs AS | PXYLP1   | 0.0041474   | 0.0391594    | 0.8839213  |
| FB vs AS | PYCR1    | 0.002445    | 0.0256397    | 2.271062   |
| FB vs AS | QDPR     | 8.00909E-05 | 0.00148843   | 0.8430736  |
| FB vs AS | RAB40C   | 0.00235355  | 0.0247167    | -1.435117  |
| FB vs AS | RABEP2   | 0.0021545   | 0.0230615    | -0.8199093 |
| FB vs AS | RABL2A   | 0.000997071 | 0.0123327    | -1.146834  |
| FB vs AS | RABL3    | 7.49017E-08 | 3.09965E-06  | 0.411851   |
| FB vs AS | RAD51D   | 0.000759016 | 0.00976805   | -1.42875   |
| FB vs AS | RAD52    | 1.03424E-06 | 3.28009E-05  | -1.747582  |

|          |                |             |             |            |
|----------|----------------|-------------|-------------|------------|
| FB vs AS | RAD54L2        | 3.45637E-06 | 9.74084E-05 | -0.7623317 |
| FB vs AS | RAI1           | 3.03273E-09 | 1.60002E-07 | -1.151546  |
| FB vs AS | RANBP3         | 0.000912955 | 0.0114577   | -0.6611434 |
| FB vs AS | RAPGEF5        | 0.00535723  | 0.0475571   | 1.578897   |
| FB vs AS | RAPGEFL1       | 4.14839E-05 | 0.000823171 | -1.696152  |
| FB vs AS | RASD2          | 0.00161105  | 0.018263    | -1.916116  |
| FB vs AS | RASGRP2        | 0           | 0           | -1.540543  |
| FB vs AS | RASL11B        | 0.000134005 | 0.00226709  | 0.776022   |
| FB vs AS | RBM17          | 1.35049E-05 | 0.000317751 | -0.9903224 |
| FB vs AS | RBM19          | 0.000130704 | 0.00222476  | -1.160423  |
| FB vs AS | RBM25          | 2.22045E-16 | 3.38603E-14 | -1.10436   |
| FB vs AS | RBM5           | 1.07821E-05 | 0.000260926 | -1.15611   |
| FB vs AS | RDH13          | 0.000317234 | 0.00474657  | -1.262857  |
| FB vs AS | REEP1          | 7.06479E-12 | 6.09653E-10 | -1.916716  |
| FB vs AS | RERG           | 1.4877E-14  | 1.80012E-12 | -1.346269  |
| FB vs AS | REXO1          | 0.00206165  | 0.0223252   | -1.152869  |
| FB vs AS | RGMA           | 7.28262E-12 | 6.23616E-10 | -1.724413  |
| FB vs AS | RGS3           | 0           | 0           | -1.361164  |
| FB vs AS | RGS4           | 5.43146E-05 | 0.00104789  | 1.896309   |
| FB vs AS | RHOT2          | 7.7649E-13  | 7.45163E-11 | -1.364904  |
| FB vs AS | RIMKLB         | 0.000679394 | 0.00890476  | -0.533097  |
| FB vs AS | RNF149         | 9.77503E-05 | 0.00175227  | -1.068844  |
| FB vs AS | RNF17          | 0.00454995  | 0.0419911   | -3.688855  |
| FB vs AS | RNF19A         | 0.00196196  | 0.0214966   | -0.5752326 |
| FB vs AS | RNF215         | 0.00276312  | 0.0284017   | -0.8323863 |
| FB vs AS | RNF40          | 0.00197024  | 0.0215449   | -0.6920108 |
| FB vs AS | ROBO2          | 3.59026E-05 | 0.000721421 | 3.976663   |
| FB vs AS | ROBO4          | 4.59666E-05 | 0.000903122 | 2.285285   |
| FB vs AS | RORA           | 2.93482E-07 | 1.06049E-05 | -1.300884  |
| FB vs AS | RPA2           | 0.00013618  | 0.00229691  | 1.039777   |
| FB vs AS | RPAIN          | 0.000954219 | 0.0118784   | -0.6541811 |
| FB vs AS | RPL15          | 0.000124984 | 0.00215041  | 0.6345801  |
| FB vs AS | RPL4           | 0.00494751  | 0.0447783   | 0.4461903  |
| FB vs AS | RPS27L         | 0           | 0           | 0.8332948  |
| FB vs AS | RPS28          | 0.00255407  | 0.0265223   | 1.078902   |
| FB vs AS | RPS6KB2        | 0.00135773  | 0.015843    | -0.9739406 |
| FB vs AS | RPS6KL1        | 0.0029777   | 0.0301387   | -1.193383  |
| FB vs AS | RRP1           | 2.52935E-11 | 1.96901E-09 | -0.9235774 |
| FB vs AS | RSAD1          | 0.000174336 | 0.00284562  | -0.9152955 |
| FB vs AS | RTEL1          | 6.58916E-06 | 0.000169793 | -1.697054  |
| FB vs AS | RTEL1-TNFRSF6B | 2.26865E-09 | 1.25023E-07 | -1.596497  |
| FB vs AS | RUNX1          | 0           | 0           | 1.621339   |
| FB vs AS | RYR3           | 2.13301E-07 | 7.86247E-06 | -2.910424  |
| FB vs AS | S100PBP        | 0.000815921 | 0.0103804   | -0.8071776 |
| FB vs AS | SAMD11         | 0.000211762 | 0.00334849  | -1.499449  |
| FB vs AS | SAMD14         | 0.00148643  | 0.0171117   | -1.125562  |
| FB vs AS | SAP18          | 1.10106E-07 | 4.3775E-06  | 0.5370403  |

|          |          |             |             |            |
|----------|----------|-------------|-------------|------------|
| FB vs AS | SAP30BP  | 8.83603E-06 | 0.000218584 | -1.341069  |
| FB vs AS | SARAF    | 9.01018E-07 | 2.90728E-05 | 0.7480006  |
| FB vs AS | SBNO2    | 2.04119E-06 | 5.99538E-05 | -1.306641  |
| FB vs AS | SC5D     | 0.00223482  | 0.0236945   | 0.6713157  |
| FB vs AS | SCAPER   | 0.00467518  | 0.0428347   | -0.5571806 |
| FB vs AS | SCARA3   | 0.000992898 | 0.0122947   | -0.4249708 |
| FB vs AS | SCG2     | 2.01069E-08 | 9.24916E-07 | 4.152176   |
| FB vs AS | SCGB3A2  | 0.00148016  | 0.0170586   | 3.625187   |
| FB vs AS | SDC4     | 9.72344E-06 | 0.000240003 | 0.6411972  |
| FB vs AS | SDK1     | 3.22935E-05 | 0.000660829 | -1.309329  |
| FB vs AS | SDPR     | 0.000525507 | 0.00716904  | 1.853789   |
| FB vs AS | SELK     | 6.05607E-06 | 0.000158254 | 0.5136751  |
| FB vs AS | SELO     | 2.56637E-05 | 0.000546248 | -0.8175752 |
| FB vs AS | SEMA3D   | 9.73593E-05 | 0.00174807  | -1.561994  |
| FB vs AS | SEMA3F   | 0.00268632  | 0.0276378   | 1.005426   |
| FB vs AS | SEMA6D   | 0.000186717 | 0.00300801  | -0.7751188 |
| FB vs AS | SEPT6    | 0.00178848  | 0.02007     | 1.136764   |
| FB vs AS | SEPT9    | 0.000236301 | 0.00367388  | -0.8949843 |
| FB vs AS | SERPINE2 | 1.69017E-07 | 6.39383E-06 | 1.975695   |
| FB vs AS | SERPINF1 | 2.22045E-16 | 3.38603E-14 | 2.541295   |
| FB vs AS | SERPINH1 | 1.55431E-15 | 2.1902E-13  | 0.879499   |
| FB vs AS | SESN3    | 0.000273518 | 0.00417097  | 1.423558   |
| FB vs AS | SETD1B   | 6.16597E-05 | 0.00117735  | -1.634486  |
| FB vs AS | SETD5    | 0           | 0           | -1.032657  |
| FB vs AS | SETDB1   | 2.43859E-07 | 8.87138E-06 | -0.9466543 |
| FB vs AS | SF1      | 0.00372439  | 0.0359271   | -0.462196  |
| FB vs AS | SFPQ     | 0.00528173  | 0.0469618   | -0.8381987 |
| FB vs AS | SFRP4    | 3.00545E-06 | 8.53487E-05 | 1.944337   |
| FB vs AS | SH2D3C   | 0.00537794  | 0.0476271   | 1.769864   |
| FB vs AS | SH3KBP1  | 7.41188E-05 | 0.00138438  | 1.137685   |
| FB vs AS | SH3RF2   | 1.16743E-10 | 8.2252E-09  | -2.075564  |
| FB vs AS | SHC2     | 6.49384E-06 | 0.000167725 | -1.134431  |
| FB vs AS | SHC4     | 2.21659E-06 | 6.45944E-05 | 1.625207   |
| FB vs AS | SHISA3   | 3.29549E-05 | 0.000671894 | 2.174241   |
| FB vs AS | SHKBP1   | 3.08934E-05 | 0.000635685 | -0.7495236 |
| FB vs AS | SHMT1    | 9.76996E-15 | 1.19516E-12 | -1.391828  |
| FB vs AS | SIK3     | 4.08817E-06 | 0.000112927 | -0.8276023 |
| FB vs AS | SIRT7    | 0.000110616 | 0.00195147  | -1.634257  |
| FB vs AS | SKOR1    | 4.78192E-08 | 2.02405E-06 | -1.353966  |
| FB vs AS | SLC11A1  | 0.00125311  | 0.0148085   | -2.048529  |
| FB vs AS | SLC26A10 | 2.94832E-09 | 1.57037E-07 | -1.472939  |
| FB vs AS | SLC26A11 | 0.000149506 | 0.00249147  | -1.087786  |
| FB vs AS | SLC26A4  | 0.00148029  | 0.0170586   | 1.745777   |
| FB vs AS | SLC26A6  | 4.10458E-09 | 2.12522E-07 | -1.595833  |
| FB vs AS | SLC27A3  | 0.00336892  | 0.0332472   | -0.583993  |
| FB vs AS | SLC29A2  | 0.000784803 | 0.0100419   | -1.614164  |
| FB vs AS | SLC2A1   | 2.81303E-05 | 0.000593675 | 0.9938415  |

|          |               |             |              |            |
|----------|---------------|-------------|--------------|------------|
| FB vs AS | SLC2A3        | 0.00133106  | 0.0155972    | 1.041265   |
| FB vs AS | SLC35D2       | 0.000251751 | 0.00389235   | -1.056859  |
| FB vs AS | SLC39A11      | 2.73995E-10 | 1.78369E-08  | -0.8873571 |
| FB vs AS | SLC3A2        | 3.77411E-06 | 0.000105561  | -0.4435498 |
| FB vs AS | SLC41A3       | 3.29044E-05 | 0.000671894  | 0.4209783  |
| FB vs AS | SLC44A1       | 0           | 0            | 0.7332075  |
| FB vs AS | SLC4A2        | 0.000142568 | 0.00239016   | -0.7467118 |
| FB vs AS | SLC4A4        | 0.00154583  | 0.0176314    | 1.165002   |
| FB vs AS | SLC4A7        | 8.2109E-06  | 0.000205402  | -0.7110633 |
| FB vs AS | SLC7A8        | 1.65E-06    | 4.92434E-05  | -1.058828  |
| FB vs AS | SLC8B1        | 1.44008E-05 | 0.000335377  | -0.7870482 |
| FB vs AS | SLFN12        | 0.000914428 | 0.0114633    | 0.74995    |
| FB vs AS | SLX1A-SULT1A3 | 0.00436394  | 0.0407277    | -1.233701  |
| FB vs AS | SMARCA4       | 5.37637E-07 | 1.82469E-05  | -1.198093  |
| FB vs AS | SMARCD3       | 5.41789E-14 | 5.91293E-12  | -0.5967341 |
| FB vs AS | SMIM12        | 0.00214589  | 0.0230358    | -0.6643212 |
| FB vs AS | SMOX          | 6.46507E-05 | 0.00122814   | -1.203914  |
| FB vs AS | SMTN          | 0           | 0            | -1.585279  |
| FB vs AS | SNED1         | 3.55271E-15 | 4.70819E-13  | -1.431176  |
| FB vs AS | SNRPA1        | 0.00557025  | 0.0487868    | -0.4376891 |
| FB vs AS | SNRPG         | 0.00042575  | 0.00606068   | 1.03586    |
| FB vs AS | SOCS3         | 2.78626E-05 | 0.000589669  | 2.182638   |
| FB vs AS | SON           | 0.00265581  | 0.0273745    | -0.5796266 |
| FB vs AS | SOX9          | 0.00105405  | 0.0128534    | 1.513334   |
| FB vs AS | SPCS2         | 0.00305856  | 0.0308125    | 0.4270857  |
| FB vs AS | SPEG          | 0           | 0            | -2.808273  |
| FB vs AS | SPG7          | 7.77156E-15 | 9.831019E-13 | -1.265948  |
| FB vs AS | SPIN2B        | 0.000166088 | 0.00272888   | -0.6596991 |
| FB vs AS | SPNS1         | 9.2772E-10  | 5.61271E-08  | -0.677797  |
| FB vs AS | SPOCD1        | 0.000190395 | 0.00304522   | -2.706509  |
| FB vs AS | SPRY1         | 0.000498029 | 0.0069128    | 0.8075566  |
| FB vs AS | SRC           | 3.55194E-06 | 9.95974E-05  | -1.560154  |
| FB vs AS | SREBF1        | 0.000895834 | 0.0112722    | -0.841022  |
| FB vs AS | SRPK3         | 0.00085049  | 0.0107343    | -1.288247  |
| FB vs AS | SRRM2         | 4.32987E-14 | 4.8687E-12   | -1.361615  |
| FB vs AS | SRRT          | 1.7031E-10  | 1.14903E-08  | -1.286067  |
| FB vs AS | ST3GAL1       | 1.63507E-06 | 4.89289E-05  | -1.695046  |
| FB vs AS | ST3GAL4       | 0.00424083  | 0.0399043    | 0.4593767  |
| FB vs AS | ST7           | 1.71433E-05 | 0.000390265  | 0.818269   |
| FB vs AS | ST7L          | 4.17776E-06 | 0.000114832  | -0.4167124 |
| FB vs AS | ST7-OT3       | 1.71433E-05 | 0.000390265  | 0.7986532  |
| FB vs AS | STAC2         | 0.00465014  | 0.0426469    | -1.166556  |
| FB vs AS | STARD9        | 6.39664E-07 | 2.13836E-05  | -1.338816  |
| FB vs AS | STAT6         | 0.000114244 | 0.00200363   | -0.5572761 |
| FB vs AS | STK32C        | 0.00358758  | 0.034981     | -1.565417  |
| FB vs AS | STMN4         | 0.00293674  | 0.0297739    | -2.090059  |
| FB vs AS | STOX2         | 1.02209E-06 | 3.25085E-05  | -2.350977  |

|          |          |             |             |            |
|----------|----------|-------------|-------------|------------|
| FB vs AS | STPG1    | 3.5644E-05  | 0.000717522 | 1.676113   |
| FB vs AS | STRN4    | 9.54548E-12 | 7.98949E-10 | -0.6670014 |
| FB vs AS | STX10    | 0           | 0           | -1.066522  |
| FB vs AS | STX18    | 0.00519027  | 0.0463337   | -1.320011  |
| FB vs AS | STX1A    | 1.55997E-06 | 4.71892E-05 | -2.011779  |
| FB vs AS | SUGCT    | 0.00117713  | 0.014075    | 1.205426   |
| FB vs AS | SULF1    | 3.48502E-05 | 0.000704089 | 0.682102   |
| FB vs AS | SUPT5H   | 7.22017E-07 | 2.38501E-05 | -0.7326733 |
| FB vs AS | SYNC     | 3.75916E-05 | 0.000751293 | -1.365236  |
| FB vs AS | SYNE1    | 0.00066956  | 0.00879993  | -0.4573942 |
| FB vs AS | SYNE2    | 4.97991E-09 | 2.53134E-07 | -0.6192864 |
| FB vs AS | SYPL2    | 0.000511406 | 0.0070197   | -2.0475    |
| FB vs AS | SYT12    | 5.92859E-14 | 6.40748E-12 | 3.991301   |
| FB vs AS | SYTL3    | 0.0056514   | 0.0492459   | -1.456647  |
| FB vs AS | SZT2     | 0.000732048 | 0.00949786  | -0.9313878 |
| FB vs AS | TAB1     | 0.00457024  | 0.0420933   | -0.9054709 |
| FB vs AS | TACC2    | 0           | 0           | -1.387787  |
| FB vs AS | TAF1     | 8.49087E-05 | 0.0015675   | -0.8544181 |
| FB vs AS | TAF1C    | 2.20958E-09 | 1.22373E-07 | -1.415863  |
| FB vs AS | TAF1D    | 0.000896147 | 0.0112722   | -0.8178437 |
| FB vs AS | TAF6L    | 0.00530599  | 0.0471399   | -1.132308  |
| FB vs AS | TAF8     | 0.00192142  | 0.0211566   | -0.70271   |
| FB vs AS | TAOK2    | 0.000485605 | 0.00677413  | -0.5255391 |
| FB vs AS | TASP1    | 9.70457E-05 | 0.00174525  | -1.487248  |
| FB vs AS | TBC1D10A | 1.05471E-13 | 1.08713E-11 | -1.046229  |
| FB vs AS | TBC1D10B | 0.00346449  | 0.0339794   | -0.7308398 |
| FB vs AS | TBC1D22A | 0.00409065  | 0.0387761   | -0.4309405 |
| FB vs AS | TBCK     | 1.84439E-05 | 0.000414784 | -0.4153049 |
| FB vs AS | TBP      | 0           | 0           | -1.598513  |
| FB vs AS | TBX20    | 0.000589863 | 0.00790065  | 3.715901   |
| FB vs AS | TCERG1   | 2.33539E-05 | 0.000505788 | -0.8326358 |
| FB vs AS | TCF21    | 0.000456907 | 0.00643834  | 1.656448   |
| FB vs AS | TCF4     | 0.00427794  | 0.0401534   | 0.4498605  |
| FB vs AS | TCFL5    | 0.000350742 | 0.00516464  | -0.6149555 |
| FB vs AS | TCHP     | 0.000572769 | 0.00774776  | -1.102049  |
| FB vs AS | TCIRG1   | 0           | 0           | -1.534613  |
| FB vs AS | TCOF1    | 2.32705E-08 | 1.05304E-06 | -0.8957996 |
| FB vs AS | TCTN1    | 0.00308337  | 0.0310344   | 0.6876549  |
| FB vs AS | TDG      | 0.00510433  | 0.0458607   | -0.537322  |
| FB vs AS | TDRD5    | 0.00361283  | 0.0351249   | -2.432118  |
| FB vs AS | TEAD2    | 0.00405679  | 0.0384997   | -0.7645598 |
| FB vs AS | TEAD3    | 0.000224868 | 0.00353564  | -1.523756  |
| FB vs AS | TECPR1   | 2.28934E-05 | 0.000497752 | -1.249273  |
| FB vs AS | TEKT4P2  | 6.2164E-09  | 3.11716E-07 | -2.426918  |
| FB vs AS | TELO2    | 7.39389E-06 | 0.00018792  | -1.289802  |
| FB vs AS | TEP1     | 0.00282379  | 0.0288654   | -1.040818  |
| FB vs AS | TFAP2A   | 0.000114292 | 0.00200363  | -3.084204  |



|          |           |             |             |            |
|----------|-----------|-------------|-------------|------------|
| FB vs AS | TFPI      | 5.30687E-14 | 5.84911E-12 | 1.585393   |
| FB vs AS | TFRC      | 0.00011974  | 0.00207301  | -0.9492536 |
| FB vs AS | TGFB1I1   | 0           | 0           | -0.5314213 |
| FB vs AS | TGFB2     | 0.00100837  | 0.0124309   | 1.534752   |
| FB vs AS | TGFBR1    | 5.18302E-05 | 0.00100809  | 0.4734212  |
| FB vs AS | THAP5     | 0.000361591 | 0.00527553  | 0.4876645  |
| FB vs AS | THBS1     | 0           | 0           | 2.868232   |
| FB vs AS | THBS2     | 5.24628E-05 | 0.00101745  | 1.2634     |
| FB vs AS | THOC5     | 0.00513593  | 0.0460332   | -0.6939241 |
| FB vs AS | THOC7     | 0.00257126  | 0.0266263   | 0.55145    |
| FB vs AS | THY1      | 0           | 0           | 3.390291   |
| FB vs AS | TIMP4     | 0.00312941  | 0.0314126   | -1.732436  |
| FB vs AS | TLE1      | 0.0053938   | 0.0476916   | -1.06146   |
| FB vs AS | TMCO4     | 1.56727E-10 | 1.06383E-08 | -0.9426574 |
| FB vs AS | TMED9     | 1.22196E-09 | 7.12192E-08 | 0.737702   |
| FB vs AS | TMEM120A  | 0.00187102  | 0.0208074   | -0.751561  |
| FB vs AS | TMEM130   | 0           | 0           | 3.513695   |
| FB vs AS | TMEM175   | 0.00041418  | 0.00591868  | -0.5682119 |
| FB vs AS | TMEM200A  | 0.00331813  | 0.0329505   | 2.95601    |
| FB vs AS | TMEM45A   | 0.00173451  | 0.0195036   | 1.42839    |
| FB vs AS | TMEM59    | 1.42748E-10 | 9.74889E-09 | 0.6802978  |
| FB vs AS | TMEM62    | 0.000342945 | 0.00508344  | -1.037363  |
| FB vs AS | TMEM63A   | 0.00223493  | 0.0236945   | -1.042291  |
| FB vs AS | TMEM94    | 1.41065E-10 | 9.74889E-09 | -1.283716  |
| FB vs AS | TMOD1     | 0.000393595 | 0.00565095  | -1.606851  |
| FB vs AS | TMTC1     | 1.39603E-05 | 0.00032717  | 1.252993   |
| FB vs AS | TNC       | 0           | 0           | -2.147106  |
| FB vs AS | TNFAIP8   | 2.96626E-05 | 0.000614905 | 0.7013391  |
| FB vs AS | TNFRSF10B | 7.70474E-07 | 2.52262E-05 | -1.48593   |
| FB vs AS | TNFRSF11B | 0.00562396  | 0.0491027   | 0.9569744  |
| FB vs AS | TNKS1BP1  | 0.000107587 | 0.00190711  | -0.8743204 |
| FB vs AS | TNNC1     | 0.00192365  | 0.0211602   | -2.686208  |
| FB vs AS | TNPO2     | 0.000301897 | 0.00456     | -0.7163665 |
| FB vs AS | TNRC18    | 2.77047E-05 | 0.000587444 | -0.8726431 |
| FB vs AS | TNRC6A    | 0.000368638 | 0.00535729  | -0.7806291 |
| FB vs AS | TNRC6C    | 0.0053699   | 0.047624    | -0.4932384 |
| FB vs AS | TNS2      | 2.54652E-05 | 0.000543063 | -0.8955759 |
| FB vs AS | TOM1      | 0.00110655  | 0.0133313   | -0.6968973 |
| FB vs AS | TOM1L2    | 0.00360924  | 0.0351207   | -0.5192578 |
| FB vs AS | TOP3A     | 0.000302858 | 0.0045645   | -0.9541149 |
| FB vs AS | TOP3B     | 0.000348117 | 0.00515188  | -1.221206  |
| FB vs AS | TOR2A     | 0.000327514 | 0.00487417  | -1.311837  |
| FB vs AS | TPD52L1   | 1.38717E-06 | 4.24231E-05 | 1.115301   |
| FB vs AS | TPM1      | 1.16187E-11 | 9.6522E-10  | -0.420563  |
| FB vs AS | TPM3      | 0.00464556  | 0.0426469   | -0.390541  |
| FB vs AS | TPM4      | 5.9163E-06  | 0.000155698 | -0.5349116 |
| FB vs AS | TRAF2     | 0.000675326 | 0.00886524  | -0.7280842 |

|          |         |             |             |            |
|----------|---------|-------------|-------------|------------|
| FB vs AS | TRAF5   | 2.11836E-07 | 7.83441E-06 | -0.625291  |
| FB vs AS | TRAFD1  | 0.00520768  | 0.0464518   | -0.5671937 |
| FB vs AS | TRAP1   | 7.15219E-05 | 0.00134263  | -0.9343544 |
| FB vs AS | TRIM3   | 0.000423199 | 0.00603207  | -1.139441  |
| FB vs AS | TRIM33  | 8.98559E-05 | 0.00163312  | -0.8814772 |
| FB vs AS | TRIM62  | 0.00160073  | 0.0181645   | -1.663971  |
| FB vs AS | TRIO    | 0           | 0           | -1.280422  |
| FB vs AS | TRIOBP  | 0.00117392  | 0.0140517   | -0.6909969 |
| FB vs AS | TRMU    | 5.93291E-06 | 0.000155767 | -1.217328  |
| FB vs AS | TRO     | 0           | 0           | -1.049572  |
| FB vs AS | TRPM4   | 7.78613E-11 | 5.64845E-09 | -1.530652  |
| FB vs AS | TSC22D1 | 0.00116976  | 0.0140169   | 0.5756124  |
| FB vs AS | TSC22D3 | 0.00231136  | 0.024435    | -0.7741162 |
| FB vs AS | TSC22D4 | 0.00385648  | 0.0369452   | -0.7888906 |
| FB vs AS | TSEN54  | 0.000254009 | 0.00392182  | -0.997335  |
| FB vs AS | TSPAN12 | 0.00220532  | 0.0234725   | 1.183859   |
| FB vs AS | TSPAN4  | 0           | 0           | 1.193416   |
| FB vs AS | TTC12   | 0.00128694  | 0.0151228   | -1.297088  |
| FB vs AS | TTC17   | 0.0010879   | 0.0131684   | -0.7388144 |
| FB vs AS | TTC39B  | 0.00228633  | 0.0242164   | -0.5632723 |
| FB vs AS | TTL11   | 8.19283E-10 | 5.12374E-08 | -0.9825194 |
| FB vs AS | TTL4    | 0.00386387  | 0.0369785   | -1.111168  |
| FB vs AS | TTYH3   | 0.00439918  | 0.0409804   | -1.435244  |
| FB vs AS | TUSC5   | 0.00449368  | 0.0415825   | -0.6632416 |
| FB vs AS | TXNRD2  | 0.00220864  | 0.0234828   | -1.163967  |
| FB vs AS | TYK2    | 5.14065E-08 | 2.16764E-06 | -1.334195  |
| FB vs AS | UACA    | 0.000187927 | 0.00301876  | 0.7333364  |
| FB vs AS | UAP1L1  | 0.00505081  | 0.0454533   | -1.50268   |
| FB vs AS | UBAP1L  | 0.00118908  | 0.0141722   | -1.898328  |
| FB vs AS | UBE2G2  | 4.08166E-06 | 0.000112927 | -0.8984872 |
| FB vs AS | UBE2J2  | 0.00461506  | 0.0424585   | -0.4306189 |
| FB vs AS | UBR4    | 1.67078E-08 | 7.81478E-07 | -0.9385529 |
| FB vs AS | ULK1    | 1.27186E-07 | 4.98535E-06 | -1.481108  |
| FB vs AS | ULK3    | 4.84057E-14 | 5.38853E-12 | -1.128047  |
| FB vs AS | UNK     | 0.00319978  | 0.0320323   | -1.059974  |
| FB vs AS | UNKL    | 1.06661E-06 | 3.36359E-05 | -1.500484  |
| FB vs AS | UPF2    | 0.000138587 | 0.00233397  | -1.59099   |
| FB vs AS | UQCRQ   | 0.00194651  | 0.0213694   | 0.7354838  |
| FB vs AS | URB1    | 0.00233361  | 0.0245958   | -1.333781  |
| FB vs AS | USP19   | 0.00157675  | 0.0179472   | -0.471363  |
| FB vs AS | USP31   | 3.01012E-05 | 0.000622837 | -1.436403  |
| FB vs AS | USP54   | 1.14822E-05 | 0.000276069 | -1.348616  |
| FB vs AS | UVSSA   | 4.35545E-08 | 1.8648E-06  | -1.959457  |
| FB vs AS | VAMP1   | 0.00427406  | 0.040151    | -1.008183  |
| FB vs AS | VAT1    | 2.61693E-09 | 1.41416E-07 | 0.6294964  |
| FB vs AS | VCAM1   | 0.000943863 | 0.0117792   | 1.566774   |
| FB vs AS | VCAN    | 0           | 0           | 1.347129   |

|          |         |             |             |            |
|----------|---------|-------------|-------------|------------|
| FB vs AS | VEGFA   | 5.93176E-05 | 0.00113653  | 1.431301   |
| FB vs AS | VEGFB   | 0.000182714 | 0.00296498  | 0.6264813  |
| FB vs AS | VEZT    | 1.17236E-05 | 0.000281265 | -0.4521974 |
| FB vs AS | VMO1    | 0.00164516  | 0.0185739   | 1.072795   |
| FB vs AS | VTI1A   | 4.54062E-06 | 0.000122983 | -1.496661  |
| FB vs AS | WDFY1   | 0.000163004 | 0.00269223  | -0.9394756 |
| FB vs AS | WDR19   | 0           | 0           | 1.328352   |
| FB vs AS | WDR4    | 0.00413078  | 0.0390355   | -0.8503507 |
| FB vs AS | WDR45   | 1.93179E-14 | 2.28773E-12 | -0.7576503 |
| FB vs AS | WDR60   | 0.00336532  | 0.0332411   | -1.354131  |
| FB vs AS | WDR73   | 4.40253E-07 | 1.51731E-05 | -0.800347  |
| FB vs AS | WDR74   | 3.18804E-07 | 1.14113E-05 | -0.8585111 |
| FB vs AS | WDR91   | 8.99302E-05 | 0.00163312  | -1.710662  |
| FB vs AS | WIPF3   | 0.00103376  | 0.0126738   | 0.829819   |
| FB vs AS | WNK2    | 0.000411021 | 0.00588866  | -1.897323  |
| FB vs AS | WWP2    | 0.000173963 | 0.0028437   | -0.6057897 |
| FB vs AS | ZBTB16  | 1.33724E-11 | 1.10268E-09 | -2.379287  |
| FB vs AS | ZCCHC11 | 1.52283E-05 | 0.000352435 | -0.4677989 |
| FB vs AS | ZCCHC14 | 3.51793E-05 | 0.000709448 | -0.8503819 |
| FB vs AS | ZFAND2B | 0.000155364 | 0.00258136  | -0.522607  |
| FB vs AS | ZFHX4   | 0.00483996  | 0.0440904   | 1.011085   |
| FB vs AS | ZFP36   | 0.000269822 | 0.00412129  | -0.6066394 |
| FB vs AS | ZGPAT   | 0.000183346 | 0.00296658  | -1.339967  |
| FB vs AS | ZIC2    | 0.000143637 | 0.00240446  | -1.214702  |
| FB vs AS | ZMIZ2   | 2.10192E-08 | 9.58959E-07 | -1.137243  |
| FB vs AS | ZMYM3   | 0.000118487 | 0.00205661  | -0.7871667 |
| FB vs AS | ZNF148  | 2.58313E-08 | 1.15484E-06 | 0.5088463  |
| FB vs AS | ZNF282  | 0.00191968  | 0.0211566   | -0.9474721 |
| FB vs AS | ZNF333  | 0.000160878 | 0.00266899  | -1.075716  |
| FB vs AS | ZNF346  | 0.000936101 | 0.0116955   | -1.389857  |
| FB vs AS | ZNF395  | 0.00395399  | 0.0376525   | -0.6541051 |
| FB vs AS | ZNF444  | 0.00248999  | 0.0259211   | -1.082107  |
| FB vs AS | ZNF469  | 0.000370807 | 0.00538178  | 1.502345   |
| FB vs AS | ZNF500  | 0.000500054 | 0.00692363  | -1.08719   |
| FB vs AS | ZNF536  | 2.4949E-08  | 1.11989E-06 | -4.404439  |
| FB vs AS | ZNF580  | 0.00152074  | 0.0174165   | -0.8756803 |
| FB vs AS | ZNF618  | 0.000666286 | 0.00876725  | -0.8746958 |
| FB vs AS | ZNF638  | 6.43929E-15 | 8.33514E-13 | -0.3943209 |
| FB vs AS | ZNF692  | 1.53139E-05 | 0.000353681 | -0.844219  |
| FB vs AS | ZNF707  | 0.00143834  | 0.0166788   | -1.024482  |
| FB vs AS | ZNF783  | 0           | 0           | -1.768951  |
| FB vs AS | ZNF784  | 0.00205379  | 0.0222617   | -1.171764  |
| FB vs AS | ZSCAN18 | 1.76269E-09 | 9.86041E-08 | -0.7921283 |
| FB vs AS | ZSWIM8  | 5.7625E-12  | 5.09112E-10 | -0.9881551 |



**Supplemental Table V Predicted reg**

| <b>GO Biological Signaling Process</b>        | <b>Pvalue</b> | <b>Minus_log10_pvalue</b> | <b>Proteins t</b> |
|-----------------------------------------------|---------------|---------------------------|-------------------|
| transmembrane receptor protein serine/thre    | 1.03E-10      | 9.987686                  | CITED1,D          |
| transforming growth factor beta receptor sig  | 3.91E-10      | 9.408047                  | CITED1,F          |
| androgen receptor signaling pathway           | 7.37E-10      | 9.132716                  | DAXX,DD           |
| cytokine-mediated signaling pathway           | 3.80E-09      | 8.420235                  | AKT1,BTF          |
| intracellular steroid hormone receptor signal | 4.64E-08      | 7.333416                  | DAXX,DD           |
| androgen receptor signaling pathway           | 5.49E-06      | 5.2605                    | DAXX,FHI          |
| transforming growth factor beta receptor sig  | 9.25E-06      | 5.033672                  | FOS,FOXI          |
| Fc-epsilon receptor signaling pathway         | 2.24E-05      | 4.649636                  | BTRC,CAI          |
| Fc receptor signaling pathway                 | 2.33E-05      | 4.6325                    | BTRC,CAI          |
| transmembrane receptor protein serine/thre    | 3.94E-05      | 4.404549                  | FOS,FOXI          |
| androgen receptor signaling pathway           | 1.42E-10      | 9.847356                  | CCNE1,D           |
| intracellular steroid hormone receptor signal | 9.26E-09      | 8.033416                  | CCNE1,D           |
| transmembrane receptor protein serine/thre    | 2.85E-08      | 7.545346                  | FOS,FOXI          |
| transforming growth factor beta receptor sig  | 2.88E-08      | 7.539952                  | FOS,FOXI          |
| cytokine-mediated signaling pathway           | 9.50E-08      | 7.022359                  | AKT1,BCL          |
| transmembrane receptor protein serine/thre    | 1.04E-09      | 8.983305                  | CITED1,F          |
| transforming growth factor beta receptor sig  | 6.29E-09      | 8.2016                    | CITED1,F          |
| DNA damage response, signal transduction      | 1.24E-08      | 7.905001                  | ATM,CDK           |
| androgen receptor signaling pathway           | 1.99E-08      | 7.701319                  | DAXX,DD           |
| DNA damage response, signal transduction      | 2.27E-08      | 7.643491                  | ATM,CDK           |

**ulatory signaling pathways in aortas of MFS patients and mice**

**hat are part of signaling process and upstream regulatory subnetwork**

DX5,FOXH1,JUN,SIRT1,SKI,SMAD1,SMAD2,SMAD3,SMAD4,SMURF1,STUB1,TGFB1I1

OXH1,JUN,SIRT1,SKI,SMAD1,SMAD2,SMAD3,SMAD4,SMURF1

X5,KAT5,PIAS2,PPARGC1A,RB1,RNF4,TGFB1I1

RC,CDKN1A,CEBPA,CHUK,FOXO1,HIF1A,HIST1H3A,HSP90AA1,IRF1,IRF7,IRF8,MYC,NFKB

X5,KAT5,PIAS2,PPARGC1A,RB1,RNF4,TGFB1I1

\_2,RB1,RNF14,RNF4

H1,JUN,SIRT1,SKI,SMAD3

LM1,FOS,JUN,MAPK8,MAPK9,RELA,VAV1

LM1,FOS,JUN,MAPK8,MAPK9,RELA,VAV1

H1,JUN,SIRT1,SKI,SMAD3,STUB1

AXX,FHL2,PIAS2,RB1,RNF14,RNF4,TGFB1I1

AXX,FHL2,PIAS2,RB1,RNF14,RNF4,TGFB1I1

H1,JUN,SIRT1,SKI,SMAD1,SMAD3,SMAD4,STUB1,TGFB1I1

H1,JUN,SIRT1,SKI,SMAD1,SMAD3,SMAD4

.6,BTRC,CEBPA,FOS,FOXO1,FOXO3,IRF1,IRF8,PML,RELA,SIRT1,SMAD4,SMARCA4,SQST

OXH1,JUN,SIRT1,SKI,SMAD1,SMAD2,SMAD3,SMAD4,SMAD7,STUB1,TGFB1I1

OXH1,JUN,SIRT1,SKI,SMAD1,SMAD2,SMAD3,SMAD4

1,CDKN1A,HIPK2,MDM4,NPM1,PLK2,PML,PRMT1

X17,FHL2,PIAS2,RB1,RNF4,TGFB1I1

1,CDKN1A,MDM4,NPM1,PLK2,PML,PRMT1

1,PML,RELA,SIRT1,SMAD4,SMARCA4,SQSTM1,STAT3,TRAF6

M1,STAT3,TRAF6,VAV1

**Supplemental Table VI. BT173 pharmacokinetics**

|                  |                |
|------------------|----------------|
| AUC 0_Last       | 102.99 ng h/mL |
| Cmax             | 24.54 ng/mL    |
| Tmax             | 1 h            |
| T <sub>1/2</sub> | 9.83 h         |
| AUC infinity     | 216.92 ng h/mL |
| CL               | 0.0922 mL/h    |



**Supplemental Table VII.** Additional metrics from biaxial mechanical testing.

|                                                                                               | Ascending Aorta        |                          |                                |                                  |
|-----------------------------------------------------------------------------------------------|------------------------|--------------------------|--------------------------------|----------------------------------|
|                                                                                               | WT VEH<br><i>n</i> = 8 | WT BT173<br><i>n</i> = 8 | MFS VEH<br><i>n</i> = 6        | MFS BT173<br><i>n</i> = 4        |
| <b>Unloaded dimensions</b>                                                                    |                        |                          |                                |                                  |
| Wall Thickness, <i>H</i> (μm)                                                                 | 126 ± 7.5              | 140 ± 5.7                | 157 ± 9.3 <sup>(1)</sup>       | 169 ± 9.9 <sup>(1)</sup>         |
| Inner Diameter, <i>2A</i> (μm)                                                                | 881 ± 21               | 875 ± 23                 | 1528 ± 154 <sup>(1)(2)</sup>   | 1018 ± 133 <sup>(3)</sup>        |
| <b><i>In Vivo</i> (Loaded) Axial Stretch, λ<sub>z</sub></b>                                   | 1.76 ± 0.02            | 1.72 ± 0.04              | 1.59 ± 0.03 <sup>(1)</sup>     | 1.61 ± 0.09                      |
| <b>Dimensions at Diastolic Pressure <i>P</i> (mmHg)</b>                                       |                        |                          |                                |                                  |
| Wall Thickness, <i>h</i> (μm)                                                                 | <b><i>P</i> = 74</b>   | <b><i>P</i> = 71</b>     | <b><i>P</i> = 80</b>           | <b><i>P</i> = 81</b>             |
| Inner Diameter, <i>2a</i> (μm)                                                                | 47 ± 3.2               | 55 ± 3.2                 | 69 ± 6.0 <sup>(1)</sup>        | 64 ± 7.5                         |
|                                                                                               | 1474 ± 32.5            | 1460 ± 33.1              | 2343 ± 181.3 <sup>(1)(2)</sup> | 1897 ± 194.0                     |
| <b>Dimensions at Systolic Pressure <i>P</i> (mmHg)</b>                                        |                        |                          |                                |                                  |
| Wall Thickness, <i>h</i> (μm)                                                                 | <b><i>P</i> = 99</b>   | <b><i>P</i> = 94</b>     | <b><i>P</i> = 105</b>          | <b><i>P</i> = 104</b>            |
| Inner Diameter, <i>2a</i> (μm)                                                                | 43 ± 3.0               | 51 ± 2.9                 | 68 ± 6.0 <sup>(1)(2)</sup>     | 63 ± 7.4 <sup>(1)</sup>          |
|                                                                                               | 1623 ± 37.0            | 1595 ± 36.7              | 2397 ± 183.0 <sup>(1)(2)</sup> | 1940 ± 197.2                     |
| <b>Distensibility (1/MPa)</b>                                                                 | 30.43 ± 0.95           | 30.03 ± 0.76             | 7.05 ± 0.65 <sup>(1)(2)</sup>  | 7.43 ± 0.37 <sup>(1)(2)</sup>    |
| <b>Additional Metrics at Systolic Pressure</b>                                                |                        |                          |                                |                                  |
| Circumferential Stretch, λ <sub>θ</sub>                                                       | 1.66 ± 0.02            | 1.62 ± 0.04              | 1.48 ± 0.04 <sup>(1)(2)</sup>  | 1.70 ± 0.04 <sup>(3)</sup>       |
| Circumferential Cauchy Stress, σ <sub>θ</sub> (kPa)                                           | 255 ± 17.3             | 202 ± 13.8               | 251 ± 13.6                     | 217 ± 18.4                       |
| Axial Cauchy Stress, σ <sub>z</sub> (kPa)                                                     | 250 ± 16.6             | 209 ± 13.9               | 170 ± 11.7 <sup>(1)</sup>      | 160 ± 16.1 <sup>(1)</sup>        |
| Circumferential Linearized Material Stiffness, $\mathcal{E}_{\theta\theta\theta\theta}$ (MPa) | 1.44 ± 0.09            | 1.22 ± 0.09              | 4.37 ± 0.31 <sup>(1)(2)</sup>  | 3.44 ± 0.19 <sup>(1)(2)(3)</sup> |
| Axial Linearized Material Stiffness, $\mathcal{E}_{zzzz}$ (MPa)                               | 1.23 ± 0.09            | 1.04 ± 0.06              | 1.27 ± 0.06                    | 1.17 ± 0.05                      |
| Stored Strain Energy Density, <i>W</i> (kPa)                                                  | 78 ± 5.3               | 62 ± 4.8                 | 36 ± 3.6 <sup>(1)(2)</sup>     | 36 ± 4.9 <sup>(1)(2)</sup>       |
|                                                                                               | Ascending Aorta        |                          |                                |                                  |
|                                                                                               | WT VEH<br><i>n</i> = 8 | WT BT173<br><i>n</i> = 8 | MFS VEH<br><i>n</i> = 6        | MFS BT173<br><i>n</i> = 4        |
| <b>Dimensions at Fixed Pressure <i>P</i> (mmHg)</b>                                           |                        |                          |                                |                                  |
| Wall Thickness, <i>h</i> (μm)                                                                 | <b><i>P</i> = 100</b>  | <b><i>P</i> = 100</b>    | <b><i>P</i> = 100</b>          | <b><i>P</i> = 100</b>            |
| Inner Diameter, <i>2a</i> (μm)                                                                | 43 ± 3.0               | 50 ± 2.9                 | 68 ± 6.0 <sup>(1)(2)</sup>     | 63 ± 7.4 <sup>(1)</sup>          |
|                                                                                               | 1628 ± 37.1            | 1620 ± 37.1              | 2389 ± 182.6 <sup>(1)(2)</sup> | 1934 ± 196.8                     |
| <b>Additional Metrics at Fixed Pressure</b>                                                   |                        |                          |                                |                                  |
| Circumferential Stretch, λ <sub>θ</sub>                                                       | <b><i>P</i> = 100</b>  | <b><i>P</i> = 100</b>    | <b><i>P</i> = 100</b>          | <b><i>P</i> = 100</b>            |
| Circumferential Cauchy Stress, σ <sub>θ</sub> (kPa)                                           | 1.66 ± 0.02            | 1.65 ± 0.04              | 1.48 ± 0.04 <sup>(1)(2)</sup>  | 1.69 ± 0.04 <sup>(3)</sup>       |
| Axial Cauchy Stress, σ <sub>z</sub> (kPa)                                                     | 259 ± 17.6             | 221 ± 15.1               | 237 ± 12.9                     | 208 ± 17.6                       |
| Circumferential Linearized Material Stiffness, $\mathcal{E}_{\theta\theta\theta\theta}$ (MPa) | 251 ± 16.7             | 217 ± 14.4               | 166 ± 11.6 <sup>(1)</sup>      | 156 ± 15.8 <sup>(1)</sup>        |
| Axial Linearized Material Stiffness, $\mathcal{E}_{zzzz}$ (MPa)                               | 1.48 ± 0.09            | 1.42 ± 0.11              | 3.90 ± 0.28 <sup>(1)(2)</sup>  | 3.15 ± 0.17 <sup>(1)(2)(3)</sup> |
| Stored Strain Energy Density, <i>W</i> (kPa)                                                  | 1.24 ± 0.09            | 1.10 ± 0.06              | 1.22 ± 0.06                    | 1.14 ± 0.05                      |
|                                                                                               | 79 ± 5.4               | 66 ± 5.0                 | 35 ± 3.5 <sup>(1)(2)</sup>     | 35 ± 4.8 <sup>(1)(2)</sup>       |

Means ± standard errors of biaxial biomechanical metrics of the ascending aorta. Superscripted numbers indicate significant differences (*p*<0.05; one-way analysis of variance (ANOVA) followed by Tukey's post-hoc test).
